# Supplementary material for: Eco-friendly synthesis of fused pyrano[2,3-b]pyrans via ammonium acetate-mediated formal oxa-[3 + 3]cycloaddition of 4H-chromene-3-carbaldehydes and cyclic 1,3-dicarbonyl compounds
Source: Royal Society of Chemistry journal article supplement (doi:10.1039/d0ra06450e), 2020-01-01

Supplementary information for

**Eco-friendly synthesis of fused pyrano[2,3-*b*]pyrans via ammonium acetate-mediated formal oxa-[3 + 3] cycloaddition of 4*H*-chromene-3-carbaldehydes and cyclic 1,3-dicarbonyl compounds**

Vitaly A. Osyanin,<sup>\*,†</sup> Dmitry V. Osipov,<sup>†</sup> Irina A. Semenova,<sup>†</sup> Kirill S. Korzhenko,<sup>†</sup> Anton V. Lukashenko,<sup>†</sup> Oleg P. Demidov,<sup>‡</sup> and Yuri N. Klimochkin<sup>†</sup>

<sup>†</sup>Department of Organic Chemistry, Chemical Technological Faculty, Samara State Technical University, 244 Molodogvardeyskaya St., Samara 443100, Russia.

<sup>‡</sup>Department of Chemistry, North Caucasus Federal University, 1 Pushkin St., Stavropol 355009, Russia.

Table of Contents

|      |                                                                                                              |            |
|------|--------------------------------------------------------------------------------------------------------------|------------|
| I.   | Raw thermodynamic data used to calculate Gibbs free energies for 1-oxatriene – 2 <i>H</i> -pyran equilibrium | <b>S1</b>  |
| II.  | Cartesian coordinates of the geometries optimized in acetic acid at the B3LYP/cc-pVDZ level for <b>3ab</b>   | <b>S2</b>  |
|      | for <b>3ad</b>                                                                                               | <b>S3</b>  |
|      | for <b>3ca</b>                                                                                               | <b>S5</b>  |
|      | for <b>3ai</b>                                                                                               | <b>S6</b>  |
|      | for <b>3aj</b>                                                                                               | <b>S8</b>  |
|      | for <b>3ak</b>                                                                                               | <b>S10</b> |
|      | for <b>Z-5al</b>                                                                                             | <b>S11</b> |
| III. | Copies of NMR spectra for type <b>3</b> series                                                               | <b>S13</b> |
|      | for <b>5ak</b>                                                                                               | <b>S63</b> |
|      | for <b>6ak</b>                                                                                               | <b>S65</b> |
|      | for <b>5al</b>                                                                                               | <b>S67</b> |

**I. Raw thermodynamic data used to calculate Gibbs free energies for 1-oxatriene – 2*H*-pyran equilibrium.**

| Compound     | Total electronic energy ( <i>E</i> , a.u.) |                        | Total Gibbs free energy ( <i>G</i> , a.u.) |                        |
|--------------|--------------------------------------------|------------------------|--------------------------------------------|------------------------|
|              | 1-oxatriene form                           | 2 <i>H</i> -pyran form | 1-oxatriene form                           | 2 <i>H</i> -pyran form |
| <b>3ab</b>   | -1071.521532                               | -1071.531084           | -1071,280270                               | -1071,285621           |
| <b>3ad</b>   | -1051.668501                               | -1051.681065           | -1051,414286                               | -1051,422182           |
| <b>3ca</b>   | -1185.863709                               | -1185.871707           | -1185,604018                               | -1185,607718           |
| <b>3ai</b>   | -1076.122537                               | -1076.128937           | -1075,808558                               | -1075,810646           |
| <b>3aj</b>   | -1228.766708                               | -1228.772292           | -1228,421632                               | -1228,422259           |
| <b>5ak</b>   | -1110.628821                               | -1110.613306           | -1110,372219                               | -1110,353547           |
| <b>Z-5al</b> | -1052.662513                               | -1052.644851           | -1052,398729                               | -1052,376779           |

All minima had no imaginary frequencies. Rate constants was defined as:  $K_{eq} = e^{\frac{-\Delta G}{RT}}$

## II. Cartesian coordinates of the geometries optimized in acetic acid at the B3LYP/cc-pVDZ level

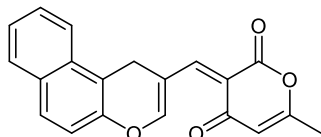

**3ab** (1-oxatriene form)

|   |             |             |             |
|---|-------------|-------------|-------------|
| C | -4.76303600 | -0.35044600 | 0.00044000  |
| C | -4.62649700 | -1.76823900 | 0.00029200  |
| C | -3.38224700 | -2.35108300 | -0.00015800 |
| C | -2.23266500 | -1.52684400 | -0.00045900 |
| C | -2.28963100 | -0.15000500 | -0.00034200 |
| C | -3.58199600 | 0.46877300  | 0.00010500  |
| O | -1.02635800 | -2.22390100 | -0.00088100 |
| C | 0.13112800  | -1.54904000 | -0.00079200 |
| C | 0.23811400  | -0.18565100 | -0.00063800 |
| C | -1.02062900 | 0.67232300  | -0.00070400 |
| O | 2.90042200  | -2.14651800 | -0.00048500 |
| C | 3.50463000  | -1.06301000 | -0.00061300 |
| C | 2.83767000  | 0.25684800  | -0.00038300 |
| C | 1.47743700  | 0.53349100  | -0.00044000 |
| C | 4.96202500  | -1.03964600 | 0.00010400  |
| C | 5.66513700  | 0.11230700  | 0.00046300  |
| H | -5.52480900 | -2.38916900 | 0.00053000  |
| H | -3.24932500 | -3.43375500 | -0.00028100 |
| H | 1.00426100  | -2.19972300 | -0.00088100 |
| H | -1.01139100 | 1.34164400  | -0.87995100 |
| H | -1.01116700 | 1.34208700  | 0.87818500  |
| H | 1.31083400  | 1.61689600  | -0.00028300 |
| C | -3.74252100 | 1.88448000  | 0.00020700  |
| H | -2.86285900 | 2.52862700  | -0.00005400 |
| C | -6.04116600 | 0.27241800  | 0.00089500  |
| C | -6.16125400 | 1.64706900  | 0.00099500  |
| H | -7.14875800 | 2.11311900  | 0.00134600  |
| C | -4.99945200 | 2.45730200  | 0.00063900  |
| H | -5.09881800 | 3.54490100  | 0.00070500  |
| H | -6.93152100 | -0.36124500 | 0.00115600  |
| C | 3.67486500  | 1.48299300  | -0.00007800 |
| O | 3.27425800  | 2.62728000  | 0.00008300  |
| O | 5.05776100  | 1.33684100  | 0.00033100  |
| C | 7.15065400  | 0.24171300  | 0.00102600  |
| H | 7.48110700  | 0.80781600  | -0.88523200 |
| H | 7.48041400  | 0.80789200  | 0.88749000  |
| H | 7.63126700  | -0.74458800 | 0.00125100  |
| H | 5.47870000  | -1.99863000 | 0.00027900  |

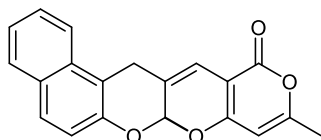

**3ab** (2H-pyran form)

|   |             |             |             |
|---|-------------|-------------|-------------|
| C | -4.27785800 | -0.71313500 | -0.48685500 |
| C | -3.69745600 | -1.96917200 | -0.82692200 |
| C | -2.36529300 | -2.21042300 | -0.60145100 |
| C | -1.54243100 | -1.19802900 | -0.03839000 |
| C | -2.04611200 | 0.05594200  | 0.28600800  |
| C | -3.44281300 | 0.30997400  | 0.07787600  |
| O | -0.22827700 | -1.56306300 | 0.15318100  |
| C | 0.49557900  | -0.73378100 | 1.08134300  |
| C | 0.31169400  | 0.70305200  | 0.70206100  |
| C | -1.11967700 | 1.14042700  | 0.81696000  |

|   |             |             |             |
|---|-------------|-------------|-------------|
| O | 1.82810700  | -1.22266200 | 1.06827600  |
| C | 2.81659000  | -0.51916100 | 0.47061100  |
| C | 2.63671100  | 0.77669400  | 0.03242900  |
| C | 1.33262700  | 1.39921500  | 0.17252900  |
| C | 4.07387700  | -1.17902200 | 0.35511500  |
| C | 5.10742000  | -0.49727700 | -0.20974600 |
| H | -4.33094900 | -2.74627400 | -1.26095800 |
| H | -1.90588400 | -3.17079300 | -0.84116300 |
| H | 0.10813300  | -0.95709900 | 2.09064100  |
| H | -1.26383800 | 2.07952400  | 0.26147500  |
| H | -1.37111800 | 1.36051500  | 1.87297400  |
| H | 1.20966600  | 2.42545700  | -0.17794100 |
| C | -4.04687400 | 1.55670600  | 0.41206800  |
| H | -3.44047000 | 2.35200800  | 0.84708300  |
| C | -5.65961800 | -0.45233000 | -0.69502400 |
| C | -6.21271900 | 0.76698200  | -0.35954700 |
| H | -7.27591200 | 0.95472000  | -0.52363200 |
| C | -5.39449800 | 1.77783900  | 0.20034000  |
| H | -5.83259900 | 2.74213000  | 0.46779600  |
| H | -6.28008600 | -1.24157100 | -1.12753200 |
| C | 3.74334700  | 1.48755800  | -0.56016900 |
| O | 3.74715900  | 2.62452400  | -0.98649800 |
| O | 4.95696800  | 0.77489600  | -0.65153500 |
| C | 6.48925000  | -1.01707000 | -0.42027500 |
| H | 6.74715700  | -0.98819800 | -1.49149300 |
| H | 7.21939000  | -0.38154800 | 0.10689700  |
| H | 6.57933500  | -2.04826900 | -0.05581300 |
| H | 4.19505000  | -2.20009300 | 0.71051800  |

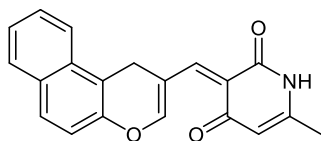

**3ad** (1-oxatriene form)

|   |             |             |             |
|---|-------------|-------------|-------------|
| C | -4.76780400 | -0.35350800 | 0.00019700  |
| C | -4.63162900 | -1.77136900 | 0.00008500  |
| C | -3.38750900 | -2.35424100 | -0.00014700 |
| C | -2.23597400 | -1.53172700 | -0.00027100 |
| C | -2.29363000 | -0.15439300 | -0.00017400 |
| C | -3.58604200 | 0.46462600  | 0.00005900  |
| O | -1.03264200 | -2.22912400 | -0.00049500 |
| C | 0.12815800  | -1.55065700 | -0.00044200 |
| C | 0.23415800  | -0.18975700 | -0.00032300 |
| C | -1.02451300 | 0.66787600  | -0.00032600 |
| O | 2.89328300  | -2.13715500 | -0.00032800 |
| C | 3.50815200  | -1.05488000 | -0.00017800 |
| C | 2.83308100  | 0.26802300  | -0.00012700 |
| C | 1.47501800  | 0.53446200  | -0.00020500 |
| C | 4.96261900  | -1.04802800 | 0.00006600  |
| C | 5.68811000  | 0.10228000  | 0.00024200  |
| H | -5.53018100 | -2.39209500 | 0.00018500  |
| H | -3.25526200 | -3.43708600 | -0.00023600 |
| H | 1.00229700  | -2.19990800 | -0.00050600 |
| H | -1.01492300 | 1.33823000  | -0.87911800 |
| H | -1.01481300 | 1.33839200  | 0.87833300  |
| H | 1.30823700  | 1.61881400  | -0.00013500 |
| C | -3.74621100 | 1.88046000  | 0.00015000  |
| H | -2.86604200 | 2.52396000  | 0.00003600  |
| C | -6.04555200 | 0.27001900  | 0.00043400  |
| C | -6.16519600 | 1.64480500  | 0.00052500  |
| H | -7.15252300 | 2.11134100  | 0.00070800  |
| C | -5.00285600 | 2.45418000  | 0.00037800  |

|   |             |             |             |
|---|-------------|-------------|-------------|
| H | -5.10146300 | 3.54191200  | 0.00044300  |
| H | -6.93623400 | -0.36331400 | 0.00054200  |
| C | 3.66841000  | 1.50860200  | 0.00004500  |
| O | 3.22652100  | 2.65758700  | 0.00001000  |
| C | 7.18599500  | 0.15376600  | 0.00046500  |
| H | 7.55544200  | 0.69330000  | -0.88771900 |
| H | 7.55517200  | 0.69324700  | 0.88879200  |
| H | 7.61153300  | -0.85743900 | 0.00049900  |
| H | 5.46260700  | -2.01583700 | 0.00008100  |
| N | 5.04411600  | 1.32195000  | 0.00022000  |
| H | 5.58932700  | 2.17914600  | 0.00032800  |

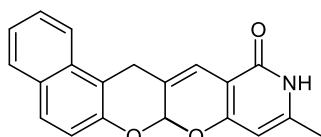

**3ad** (2H-pyran form)

|   |             |             |             |
|---|-------------|-------------|-------------|
| C | -4.27092700 | -0.71859600 | -0.49934300 |
| C | -3.68330900 | -1.96907200 | -0.84735300 |
| C | -2.35129900 | -2.20615100 | -0.61698300 |
| C | -1.53400600 | -1.19599600 | -0.04048300 |
| C | -2.04582900 | 0.05348900  | 0.29161300  |
| C | -3.44253100 | 0.30286000  | 0.07833700  |
| O | -0.22189900 | -1.55833200 | 0.15574400  |
| C | 0.49763100  | -0.72956700 | 1.09692600  |
| C | 0.30674100  | 0.70700800  | 0.72357100  |
| C | -1.12676400 | 1.13810600  | 0.83594600  |
| O | 1.82683800  | -1.20897000 | 1.09664900  |
| C | 2.81926500  | -0.50928100 | 0.47959100  |
| C | 2.63078400  | 0.79007900  | 0.04095500  |
| C | 1.32639200  | 1.40496600  | 0.19221900  |
| C | 4.06385900  | -1.18004900 | 0.35863500  |
| C | 5.11449300  | -0.51068700 | -0.21904400 |
| H | -4.31118000 | -2.74518100 | -1.29137900 |
| H | -1.88664600 | -3.16258500 | -0.86261800 |
| H | 0.09612900  | -0.96200000 | 2.09894700  |
| H | -1.27296900 | 2.08064500  | 0.28654200  |
| H | -1.38636300 | 1.34918100  | 1.89202600  |
| H | 1.20185800  | 2.43177500  | -0.15708300 |
| C | -4.05392800 | 1.54419600  | 0.41999300  |
| H | -3.45285000 | 2.33817700  | 0.86470200  |
| C | -5.65270300 | -0.46174500 | -0.71205500 |
| C | -6.21280900 | 0.75229300  | -0.36891700 |
| H | -7.27601400 | 0.93693100  | -0.53660600 |
| C | -5.40143300 | 1.76164900  | 0.20358400  |
| H | -5.84480300 | 2.72186200  | 0.47713600  |
| H | -6.26768700 | -1.24991300 | -1.15438700 |
| C | 3.73173900  | 1.51071900  | -0.56653800 |
| O | 3.69369800  | 2.67017100  | -0.99066700 |
| C | 6.47892300  | -1.10098500 | -0.41341400 |
| H | 6.74811300  | -1.11953500 | -1.48263700 |
| H | 7.24293300  | -0.50126200 | 0.10869200  |
| H | 6.51615800  | -2.12731700 | -0.02671600 |
| H | 4.17179200  | -2.20109000 | 0.71847200  |
| N | 4.92402300  | 0.77323100  | -0.65313700 |
| H | 5.69853200  | 1.27531100  | -1.08038200 |



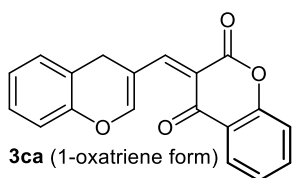

|   |             |             |             |
|---|-------------|-------------|-------------|
| C | 5.40157453  | -0.55686882 | 0.00001475  |
| C | 5.16439853  | -1.96129982 | 0.00000875  |
| C | 3.88176353  | -2.45411482 | -0.00002325 |
| C | 2.79470353  | -1.54932482 | -0.00004825 |
| C | 2.94916953  | -0.18033182 | -0.00004325 |
| C | 4.28222153  | 0.34481018  | -0.00001325 |
| O | 1.54049953  | -2.15779482 | -0.00007625 |
| C | 0.43494553  | -1.40384482 | -0.00005025 |
| C | 0.42376553  | -0.03511082 | -0.00003725 |
| C | 1.74181953  | 0.72982718  | -0.00007725 |
| O | -2.36820847 | -1.77700982 | -0.00011425 |
| C | -2.89282147 | -0.65632682 | 0.00003175  |
| C | -2.13787747 | 0.60732818  | 0.00003875  |
| C | -0.75768047 | 0.77333918  | 0.00000675  |
| H | 6.01640653  | -2.64437782 | 0.00002875  |
| H | 3.67189553  | -3.52451682 | -0.00002825 |
| H | -0.47933247 | -1.99346882 | -0.00003725 |
| H | 1.78038753  | 1.39803418  | 0.87897175  |
| H | 1.78038153  | 1.39795318  | -0.87919125 |
| H | -0.50947747 | 1.84074718  | 0.00002175  |
| C | -2.87203447 | 1.90359918  | 0.00007775  |
| O | -2.36063947 | 3.00394918  | 0.00011875  |
| O | -4.25153047 | 1.88753618  | 0.00009975  |
| C | -4.97754047 | 0.72270118  | 0.00005775  |
| C | -6.36969647 | 0.85624718  | 0.00005575  |
| C | -7.16017247 | -0.29133582 | -0.00000125 |
| H | -8.24768347 | -0.19251082 | -0.00000425 |
| C | -4.36752547 | -0.53681882 | 0.00000875  |
| C | -5.18468347 | -1.68288882 | -0.00005125 |
| C | -6.56978847 | -1.56649982 | -0.00005525 |
| H | -7.19655547 | -2.45987782 | -0.00009925 |
| H | -6.80644447 | 1.85565518  | 0.00009475  |
| H | -4.69307447 | -2.65634782 | -0.00008825 |
| H | 4.44668264  | 1.42263514  | -0.00001167 |
| H | 6.42066344  | -0.17014179 | 0.00004029  |

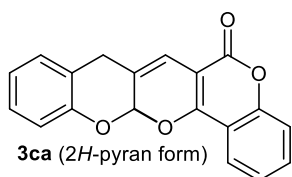

|   |             |             |             |
|---|-------------|-------------|-------------|
| C | -4.73439760 | -0.90605194 | -0.52033527 |
| C | -4.03499160 | -2.07195594 | -0.94651527 |
| C | -2.68109460 | -2.18785794 | -0.75349227 |
| C | -1.95668460 | -1.13251494 | -0.13728727 |
| C | -2.57964160 | 0.03953306  | 0.27365773  |
| C | -3.99854460 | 0.16089206  | 0.09851973  |
| O | -0.60726060 | -1.36926694 | 0.01337473  |
| C | 0.04052740  | -0.53474894 | 0.98815873  |
| C | -0.29365260 | 0.89795506  | 0.70790673  |
| C | -1.75992060 | 1.17833206  | 0.86321473  |
| O | 1.41757640  | -0.87732394 | 0.92983473  |
| C | 2.31621040  | -0.03812294 | 0.37021673  |
| C | 2.00261640  | 1.25241406  | 0.02654573  |
| C | 0.64363540  | 1.72898906  | 0.22074873  |
| H | -4.59368360 | -2.88191294 | -1.42124227 |

|   |             |             |             |
|---|-------------|-------------|-------------|
| H | -2.13020960 | -3.07858994 | -1.05981727 |
| H | -0.30321360 | -0.86198094 | 1.98454273  |
| H | -2.00708060 | 2.13070406  | 0.37028673  |
| H | -2.01426760 | 1.30508306  | 1.93367873  |
| H | 0.41474840  | 2.75856706  | -0.05830227 |
| C | 3.01739740  | 2.13239106  | -0.53000727 |
| O | 2.85143240  | 3.28793106  | -0.86163827 |
| O | 4.29328940  | 1.60191506  | -0.69405527 |
| C | 4.60522340  | 0.31562806  | -0.35093427 |
| C | 5.92297940  | -0.10108594 | -0.56123827 |
| C | 6.28523140  | -1.40431394 | -0.22778027 |
| H | 7.31351240  | -1.73267494 | -0.39127327 |
| C | 3.64668340  | -0.56340594 | 0.19137173  |
| C | 4.03256540  | -1.87898294 | 0.52154073  |
| C | 5.34163740  | -2.29516094 | 0.31342673  |
| H | 5.63690840  | -3.31405494 | 0.56903573  |
| H | 6.63901240  | 0.60500206  | -0.98316127 |
| H | 3.28644940  | -2.55582594 | 0.93762273  |
| H | -4.51710761 | 1.06124823  | 0.43454826  |
| H | -5.81311447 | -0.82496310 | -0.66202336 |

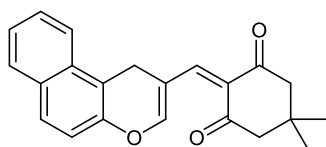

**3ai** (1-oxatriene form)

|   |             |             |             |
|---|-------------|-------------|-------------|
| C | 5.10458100  | -0.36442900 | 0.03493800  |
| C | 4.96299500  | -1.78139300 | 0.06675400  |
| C | 3.71673300  | -2.35981900 | 0.06634200  |
| C | 2.56880700  | -1.53310300 | 0.03355800  |
| C | 2.63153200  | -0.15653100 | 0.00142500  |
| C | 3.92612800  | 0.45779300  | 0.00209600  |
| O | 1.36212500  | -2.22556900 | 0.03906200  |
| C | 0.20485300  | -1.54300400 | 0.00605200  |
| C | 0.10271000  | -0.18229500 | -0.03287300 |
| C | 1.36567300  | 0.66975700  | -0.03390400 |
| O | -2.57343100 | -2.08310600 | -0.18117400 |
| C | -3.16505400 | -1.00532400 | -0.27456600 |
| C | -2.49387900 | 0.30566700  | -0.15120600 |
| C | -1.13380500 | 0.54881000  | -0.05059700 |
| C | -4.66068100 | -1.02735300 | -0.55759800 |
| C | -5.47024500 | 0.11372500  | 0.08443800  |
| C | -4.83006200 | 1.43337700  | -0.37818200 |
| H | 5.85913000  | -2.40509800 | 0.09175500  |
| H | 3.58042100  | -3.44187000 | 0.09090400  |
| H | -0.66679700 | -2.19301500 | 0.01788400  |
| H | 1.34572600  | 1.36041000  | 0.82891100  |
| H | 1.37102200  | 1.31945800  | -0.92784500 |
| H | -0.96038100 | 1.63107200  | 0.01443100  |
| H | -4.77114700 | -0.97047600 | -1.65767100 |
| H | -5.03292500 | -2.01694200 | -0.25318400 |
| H | -4.96387300 | 1.53334300  | -1.47265400 |
| H | -5.31197900 | 2.31090100  | 0.07838100  |
| C | -5.43790500 | 0.00461200  | 1.62144300  |
| H | -6.01193900 | 0.82533400  | 2.08145700  |
| H | -5.88259900 | -0.94746700 | 1.95393200  |
| H | -4.41166600 | 0.05104100  | 2.02133700  |
| C | -6.92759600 | 0.04735200  | -0.39846400 |
| H | -7.39890100 | -0.90155800 | -0.09450700 |
| H | -7.52080100 | 0.87180100  | 0.02976000  |
| H | -6.98932500 | 0.12020700  | -1.49663000 |
| C | -3.33590100 | 1.55267400  | -0.12657000 |

|   |             |             |             |
|---|-------------|-------------|-------------|
| O | -2.84633200 | 2.66240900  | 0.06309900  |
| C | 4.09155600  | 1.87265600  | -0.02917400 |
| H | 3.21390700  | 2.51912800  | -0.05404600 |
| C | 6.38464100  | 0.25439200  | 0.03487800  |
| C | 6.50943100  | 1.62835800  | 0.00404400  |
| H | 7.49845000  | 2.09129600  | 0.00440500  |
| C | 5.35029300  | 2.44169000  | -0.02817900 |
| H | 5.45310000  | 3.52876200  | -0.05238600 |
| H | 7.27286200  | -0.38187600 | 0.05995300  |

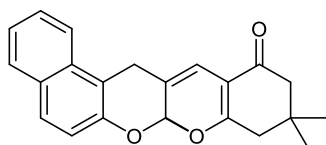

**3ai** (2H-pyran form)

|   |             |             |             |
|---|-------------|-------------|-------------|
| C | -4.62286500 | -0.71736800 | -0.41932700 |
| C | -4.05262200 | -1.97374100 | -0.77482400 |
| C | -2.71354100 | -2.21279500 | -0.59233000 |
| C | -1.87271600 | -1.19868400 | -0.05897100 |
| C | -2.36740500 | 0.05592100  | 0.27914400  |
| C | -3.77051000 | 0.30757500  | 0.11559700  |
| O | -0.55367900 | -1.56368900 | 0.08983200  |
| C | 0.20275100  | -0.72570300 | 0.98734600  |
| C | 0.00127400  | 0.70756100  | 0.60954500  |
| C | -1.42573300 | 1.14334600  | 0.77706300  |
| O | 1.53721300  | -1.20430300 | 0.92562100  |
| C | 2.50154200  | -0.50454000 | 0.27997900  |
| C | 2.30257700  | 0.76853500  | -0.16546000 |
| C | 1.00197100  | 1.39446500  | 0.03516400  |
| C | 3.78005700  | -1.26986500 | 0.14627800  |
| C | 5.01618400  | -0.35903200 | -0.04441700 |
| C | 4.67384300  | 0.71003400  | -1.10622000 |
| H | -4.69904900 | -2.75270500 | -1.18590900 |
| H | -2.26129000 | -3.17341300 | -0.84456000 |
| H | -0.14630300 | -0.94969900 | 2.01055400  |
| H | -1.59179000 | 2.08151900  | 0.22607100  |
| H | -1.64093000 | 1.36340300  | 1.84106100  |
| H | 0.87272600  | 2.41968500  | -0.31685800 |
| C | 3.39581300  | 1.49082600  | -0.83338200 |
| H | 3.67628400  | -1.94972300 | -0.72050800 |
| H | 3.89650600  | -1.91830300 | 1.02970700  |
| H | 5.49416800  | 1.43296300  | -1.23017700 |
| H | 4.53361400  | 0.21558500  | -2.08646500 |
| C | 5.39517000  | 0.31510700  | 1.28907400  |
| H | 5.66067400  | -0.44140200 | 2.04535200  |
| H | 6.26649100  | 0.97586400  | 1.15282000  |
| H | 4.57270600  | 0.92421800  | 1.69580100  |
| C | 6.19982300  | -1.21023800 | -0.53052400 |
| H | 7.09733700  | -0.58665100 | -0.67077700 |
| H | 6.44620500  | -1.99598000 | 0.20243600  |
| H | 5.97400900  | -1.70091600 | -1.49124600 |
| O | 3.26930900  | 2.66020400  | -1.18923100 |
| C | -4.36477200 | 1.55470900  | 0.46601100  |
| H | -3.74524700 | 2.35138200  | 0.87942900  |
| C | -6.01078100 | -0.45796400 | -0.58367900 |
| C | -6.55379800 | 0.76185300  | -0.23380100 |
| H | -7.62183400 | 0.94853600  | -0.36425200 |
| C | -5.71863400 | 1.77455500  | 0.29704100  |
| H | -6.14855700 | 2.73928100  | 0.57602600  |
| H | -6.64424800 | -1.24869400 | -0.99411600 |

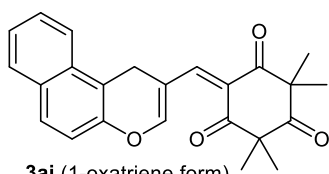

**3aj** (1-oxatriene form)

|   |             |             |             |
|---|-------------|-------------|-------------|
| C | -5.58602200 | -0.31888100 | 0.07029400  |
| C | -5.46519900 | -1.70432800 | -0.23768900 |
| C | -4.23359700 | -2.26154200 | -0.48296900 |
| C | -3.07907600 | -1.44515600 | -0.42546000 |
| C | -3.12209600 | -0.09891000 | -0.13112600 |
| C | -4.40172600 | 0.49359200  | 0.12382700  |
| O | -1.89028200 | -2.11259900 | -0.70154100 |
| C | -0.72842200 | -1.43629900 | -0.66373700 |
| C | -0.60846700 | -0.11035500 | -0.36993300 |
| C | -1.85101900 | 0.71877700  | -0.07899500 |
| O | 2.04659600  | -2.07320100 | -0.43111600 |
| C | 2.57583700  | -1.02191700 | -0.07692900 |
| C | 1.97949900  | 0.31072300  | -0.30531700 |
| C | 0.63494500  | 0.61170500  | -0.39193100 |
| C | 3.87130400  | -1.08819600 | 0.75384500  |
| C | 4.41451800  | 1.20196800  | -0.45148200 |
| H | -6.36584900 | -2.32070700 | -0.27780900 |
| H | -4.11377200 | -3.31884600 | -0.72327000 |
| H | 0.12307400  | -2.06345800 | -0.91538100 |
| H | -1.91141200 | 1.55917400  | -0.79511200 |
| H | -1.75420500 | 1.18996800  | 0.91574600  |
| H | 0.48597700  | 1.69878700  | -0.43733400 |
| C | 2.90077400  | 1.48604600  | -0.38483800 |
| O | 2.49246700  | 2.63728500  | -0.46620500 |
| C | 4.78649200  | 0.13855900  | 0.58519400  |
| O | 5.79582400  | 0.23579200  | 1.25734000  |
| C | 4.71546600  | 0.60970800  | -1.86262400 |
| H | 5.79319400  | 0.40583000  | -1.95532000 |
| H | 4.16877300  | -0.32273200 | -2.06688100 |
| H | 4.43190000  | 1.34348200  | -2.63266300 |
| C | 5.22500600  | 2.48276400  | -0.24085700 |
| H | 6.29937700  | 2.26283700  | -0.30037000 |
| H | 4.96306700  | 3.22582000  | -1.00576600 |
| H | 5.02104600  | 2.92353200  | 0.74568600  |
| C | 4.67618200  | -2.35848700 | 0.41634800  |
| H | 4.05862400  | -3.24976000 | 0.58902800  |
| H | 4.99592700  | -2.36643800 | -0.63728700 |
| H | 5.57132500  | -2.40372700 | 1.05186900  |
| C | 3.42689700  | -1.13358000 | 2.24251100  |
| H | 2.81755200  | -2.03189700 | 2.42121400  |
| H | 4.31930800  | -1.16698600 | 2.88344000  |
| H | 2.83313700  | -0.24847100 | 2.51938700  |
| C | -4.54624600 | 1.87688900  | 0.43305500  |
| H | -3.66384100 | 2.51568800  | 0.47965200  |
| C | -6.85097800 | 0.27773600  | 0.32567700  |
| C | -6.95576500 | 1.62142900  | 0.62209700  |
| H | -7.93339400 | 2.06767100  | 0.81590100  |
| C | -5.79083500 | 2.42521800  | 0.67525700  |
| H | -5.87775800 | 3.48833500  | 0.90994000  |
| H | -7.74372800 | -0.35110600 | 0.28219300  |

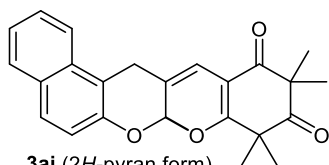

**3aj** (2H-pyran form)

|   |             |             |             |
|---|-------------|-------------|-------------|
| C | 5.03147500  | -0.56050000 | 0.64575300  |
| C | 4.42832700  | -1.72912400 | 1.19393800  |
| C | 3.10020700  | -1.99981700 | 0.97847800  |
| C | 2.30400200  | -1.10366300 | 0.21567000  |
| C | 2.83019400  | 0.06616400  | -0.32012300 |
| C | 4.22355400  | 0.34577300  | -0.12164200 |
| O | 0.99107900  | -1.49114700 | 0.05771100  |
| C | 0.30318200  | -0.83869600 | -1.02594500 |
| C | 0.49385300  | 0.63911300  | -0.91068800 |
| C | 1.93154900  | 1.04043300  | -1.06920500 |
| O | -1.03853900 | -1.29286900 | -0.95876200 |
| C | -2.03698300 | -0.49789000 | -0.50520000 |
| C | -1.85068900 | 0.83392900  | -0.28774000 |
| C | -0.53355900 | 1.41477300  | -0.53232900 |
| C | -3.33326200 | -1.26035400 | -0.38095100 |
| C | -4.23611900 | 1.02774100  | 0.69010400  |
| H | 5.04109600  | -2.41689500 | 1.78135700  |
| H | 2.62399800  | -2.89708100 | 1.37716500  |
| H | 0.70861800  | -1.25045200 | -1.96634500 |
| H | 2.07247600  | 2.06552700  | -0.69451100 |
| H | 2.21143300  | 1.05715800  | -2.14054400 |
| H | -0.41997300 | 2.48782700  | -0.36981900 |
| C | -2.94700800 | 1.69239800  | 0.17652600  |
| O | -2.81887000 | 2.91167000  | 0.22543800  |
| C | -4.50018600 | -0.34121300 | 0.04726100  |
| O | -5.64024900 | -0.74253900 | -0.09102000 |
| C | -5.44254700 | 1.95414300  | 0.47760600  |
| H | -5.63856900 | 2.11001900  | -0.59429000 |
| H | -6.34238200 | 1.51609100  | 0.92840900  |
| H | -5.24040500 | 2.93149300  | 0.93439200  |
| C | -4.02486700 | 0.79532900  | 2.21796500  |
| H | -3.89627100 | 1.77025300  | 2.71184200  |
| H | -4.90690800 | 0.29548400  | 2.64631200  |
| H | -3.13465300 | 0.18542700  | 2.43034400  |
| C | -3.68959600 | -1.89913700 | -1.74697000 |
| H | -3.77595200 | -1.13216600 | -2.53220200 |
| H | -2.91412900 | -2.61792200 | -2.04331400 |
| H | -4.65348600 | -2.41702500 | -1.66133800 |
| C | -3.18850600 | -2.38267700 | 0.68390500  |
| H | -4.13820500 | -2.93063800 | 0.76443300  |
| H | -2.39584000 | -3.08086400 | 0.37985200  |
| H | -2.93005500 | -1.98038400 | 1.67437100  |
| C | 4.85033200  | 1.50616000  | -0.66168100 |
| H | 4.26511100  | 2.21104900  | -1.25334400 |
| C | 6.40972700  | -0.27365500 | 0.84268600  |
| C | 6.98513500  | 0.86001200  | 0.30530500  |
| H | 8.04532600  | 1.06877400  | 0.46320600  |
| C | 6.19384700  | 1.75502200  | -0.45468400 |
| H | 6.64965700  | 2.65113700  | -0.88190200 |
| H | 7.00938200  | -0.97330600 | 1.43074900  |

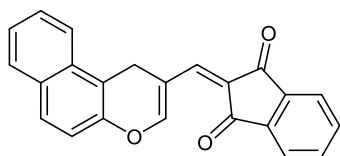

**5ak** (1-oxatriene form)

|   |             |             |             |
|---|-------------|-------------|-------------|
| C | -5.22679200 | -0.43426500 | -0.00011500 |
| C | -5.01999900 | -1.84349300 | -0.00023800 |
| C | -3.74846900 | -2.36364600 | -0.00025700 |
| C | -2.63899000 | -1.48513700 | -0.00015100 |
| C | -2.76553700 | -0.11167000 | -0.00003000 |
| C | -4.08738400 | 0.44171500  | -0.00000900 |
| O | -1.40315200 | -2.12441900 | -0.00018500 |
| C | -0.28045100 | -1.38381500 | -0.00012400 |
| C | -0.24785700 | -0.02137600 | -0.00000700 |
| C | -1.54064300 | 0.77635600  | 0.00007700  |
| O | 2.62096800  | -2.03309100 | 0.00021000  |
| C | 3.05334400  | -0.88180000 | -0.00003200 |
| C | 2.31443500  | 0.40248100  | 0.00002900  |
| C | 0.98029400  | 0.72539000  | 0.00003900  |
| H | -5.88659100 | -2.50807600 | -0.00032100 |
| H | -3.56252000 | -3.43854900 | -0.00035300 |
| H | 0.62067600  | -1.99834100 | -0.00019900 |
| H | -1.56336000 | 1.44638800  | -0.87878000 |
| H | -1.56336900 | 1.44618500  | 0.87908800  |
| H | 0.83194200  | 1.81439000  | 0.00009900  |
| C | 3.32320700  | 1.50546500  | 0.00012700  |
| O | 3.09705000  | 2.70841500  | -0.00016700 |
| C | 5.61158700  | -1.38607800 | 0.00018600  |
| C | 6.88685700  | -0.80740100 | 0.00017500  |
| C | 7.04757800  | 0.58951100  | 0.00008600  |
| C | 5.93634300  | 1.44176700  | 0.00002400  |
| C | 4.66965500  | 0.86034800  | 0.00005800  |
| C | 4.50900200  | -0.53323100 | 0.00010500  |
| H | 5.47614200  | -2.46895800 | 0.00021500  |
| H | 7.77175900  | -1.44735200 | 0.00021800  |
| H | 8.05454500  | 1.01203800  | 0.00008100  |
| H | 6.05021200  | 2.52718800  | -0.00000900 |
| C | -4.31800700 | 1.84780600  | 0.00011600  |
| H | -3.47114800 | 2.53458500  | 0.00020300  |
| C | -6.53408200 | 0.12452500  | -0.00009300 |
| C | -6.72222000 | 1.49161000  | 0.00003000  |
| H | -7.73156800 | 1.90831300  | 0.00004700  |
| C | -5.60175600 | 2.35798800  | 0.00013600  |
| H | -5.75456700 | 3.43941700  | 0.00023400  |
| H | -7.39177500 | -0.55276900 | -0.00017500 |

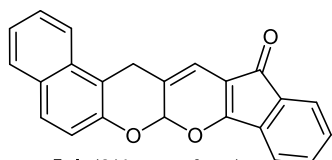

**5ak** (2H-pyran form)

|   |             |             |             |
|---|-------------|-------------|-------------|
| C | -4.63669300 | -0.82179000 | -0.49307100 |
| C | -3.97713200 | -2.03044300 | -0.85954800 |
| C | -2.62867300 | -2.18376100 | -0.65466600 |
| C | -1.87008700 | -1.12543300 | -0.08667100 |
| C | -2.45219200 | 0.08655800  | 0.26307900  |
| C | -3.86570500 | 0.24781200  | 0.07657500  |
| O | -0.53070000 | -1.40193400 | 0.08388100  |
| C | 0.14335900  | -0.54283300 | 1.01645900  |
| C | -0.13500500 | 0.89193400  | 0.65910900  |
| C | -1.59352000 | 1.22254900  | 0.79953700  |

|   |             |             |             |
|---|-------------|-------------|-------------|
| O | 1.51252600  | -0.96383400 | 0.98240900  |
| C | 2.40727800  | -0.14825600 | 0.41538000  |
| C | 2.15510500  | 1.12936900  | -0.00063500 |
| C | 0.82708400  | 1.67852600  | 0.13414100  |
| H | -4.56229600 | -2.84257500 | -1.29724400 |
| H | -2.10826400 | -3.10695400 | -0.91471200 |
| H | -0.21805400 | -0.80170300 | 2.02670500  |
| H | -1.81001700 | 2.15819100  | 0.26184500  |
| H | -1.84581400 | 1.40862700  | 1.86212300  |
| H | 0.61891500  | 2.69975900  | -0.19255600 |
| C | 3.41659200  | 1.69321000  | -0.52694000 |
| O | 3.60921500  | 2.80812900  | -0.98784900 |
| C | 4.51723000  | -1.69716300 | 0.46970600  |
| C | 5.88816900  | -1.72580800 | 0.13696400  |
| C | 6.51471600  | -0.61858100 | -0.43703100 |
| C | 5.78921500  | 0.56403700  | -0.70059200 |
| C | 4.44682400  | 0.59172000  | -0.37293500 |
| C | 3.81447400  | -0.53022500 | 0.20759500  |
| H | 4.03028300  | -2.56526900 | 0.91661000  |
| H | 6.46667600  | -2.63104200 | 0.33241600  |
| H | 7.57689700  | -0.66740700 | -0.68498900 |
| H | 6.27073500  | 1.43481900  | -1.14992900 |
| C | -4.54843400 | 1.44552900  | 0.43724400  |
| H | -3.99159700 | 2.27389700  | 0.87673100  |
| C | -6.03571700 | -0.65285800 | -0.67985300 |
| C | -6.66577700 | 0.52097000  | -0.31893400 |
| H | -7.74141000 | 0.63809000  | -0.46669700 |
| C | -5.91073100 | 1.57720100  | 0.24592600  |
| H | -6.40977400 | 2.50537700  | 0.53359900  |
| H | -6.60690100 | -1.47628400 | -1.11645600 |

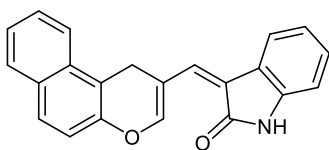

Z-5al (1-oxatriene form)

|   |             |             |             |
|---|-------------|-------------|-------------|
| C | -4.93913300 | -0.10355100 | -0.00005400 |
| C | -4.92606800 | -1.52807400 | -0.00004700 |
| C | -3.73747800 | -2.21641200 | -0.00003900 |
| C | -2.51546000 | -1.50020400 | -0.00003600 |
| C | -2.45621800 | -0.12138500 | -0.00004000 |
| C | -3.69015300 | 0.60755700  | -0.00005000 |
| O | -1.38356800 | -2.29889200 | -0.00003000 |
| C | -0.16154700 | -1.71291300 | -0.00002000 |
| C | 0.05453100  | -0.37167800 | -0.00002100 |
| C | -1.12213200 | 0.59105500  | -0.00003500 |
| C | 2.65890400  | -0.21627500 | -0.00001900 |
| C | 1.36651200  | 0.23919800  | -0.00001400 |
| H | -5.87511400 | -2.06861700 | -0.00005100 |
| H | -3.70066100 | -3.30677500 | -0.00003600 |
| H | 0.64518800  | -2.44475300 | -0.00001700 |
| H | -1.05406100 | 1.25923900  | -0.87883900 |
| H | -1.05407400 | 1.25924800  | 0.87876300  |
| H | 1.30108300  | 1.33432300  | -0.00002000 |
| C | 6.28230500  | 0.33791300  | 0.00020900  |
| C | 4.98903200  | -0.17720100 | 0.00011200  |
| C | 3.84434600  | 0.65414900  | -0.00001300 |
| C | 4.01157800  | 2.04152800  | -0.00004600 |
| C | 5.30729000  | 2.57593800  | 0.00002500  |
| C | 6.42741500  | 1.73332200  | 0.00015100  |
| H | 7.15271200  | -0.32081600 | 0.00031900  |
| H | 3.14687400  | 2.70919200  | -0.00012300 |

|   |             |             |             |
|---|-------------|-------------|-------------|
| H | 5.44423000  | 3.65907200  | -0.00000400 |
| H | 7.43033800  | 2.16555700  | 0.00021800  |
| C | 3.18737500  | -1.61991300 | -0.00007300 |
| O | 2.59536000  | -2.70002100 | 0.00009100  |
| N | 4.56698800  | -1.50706800 | 0.00014900  |
| H | 5.17207100  | -2.31958200 | 0.00028700  |
| C | -3.72730300 | 2.03210000  | -0.00005900 |
| H | -2.79458500 | 2.59681300  | -0.00005000 |
| C | -6.15754800 | 0.62868700  | -0.00006700 |
| C | -6.15769200 | 2.00891600  | -0.00007900 |
| H | -7.10071500 | 2.55951100  | -0.00009000 |
| C | -4.92925400 | 2.71350600  | -0.00007400 |
| H | -4.93247400 | 3.80573600  | -0.00008400 |
| H | -7.09989400 | 0.07506800  | -0.00006900 |

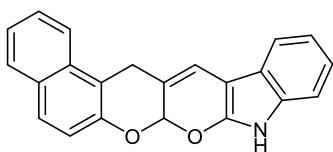

Z-5al (2H-pyran form)

|   |             |             |             |
|---|-------------|-------------|-------------|
| C | -4.49482800 | -0.43254800 | -0.67480400 |
| C | -3.98836200 | -1.67489100 | -1.15442100 |
| C | -2.69420800 | -2.05116400 | -0.89520900 |
| C | -1.83421500 | -1.19426600 | -0.15571800 |
| C | -2.26346000 | 0.04368000  | 0.31023400  |
| C | -3.62254000 | 0.43445400  | 0.06744900  |
| O | -0.56916900 | -1.69159900 | 0.05552300  |
| C | 0.16260700  | -1.04074900 | 1.11889700  |
| C | 0.11120000  | 0.44682000  | 0.91058000  |
| C | -1.29282100 | 0.96937000  | 1.03094000  |
| C | 2.43988700  | 0.41997400  | 0.29611900  |
| C | 1.19294600  | 1.12928300  | 0.47509800  |
| H | -4.64894300 | -2.33303000 | -1.72384400 |
| H | -2.29295900 | -3.00543100 | -1.24077600 |
| H | -0.30985900 | -1.34876900 | 2.06747900  |
| H | -1.34418900 | 1.98373200  | 0.60632100  |
| H | -1.59098000 | 1.06228500  | 2.09415700  |
| H | 1.12376800  | 2.19676700  | 0.25034200  |
| C | 5.87601700  | -0.54461100 | -0.45182500 |
| C | 4.53122500  | -0.47647900 | -0.08326100 |
| C | 3.77457300  | 0.73412300  | -0.16042800 |
| C | 4.41240800  | 1.89768800  | -0.62606200 |
| C | 5.75702400  | 1.83374000  | -0.99393300 |
| C | 6.48225500  | 0.62834500  | -0.90936600 |
| H | 6.43303600  | -1.48166800 | -0.38526000 |
| H | 3.86332200  | 2.83929800  | -0.69844700 |
| H | 6.25830200  | 2.73463600  | -1.35532400 |
| H | 7.53321200  | 0.60808000  | -1.20533600 |
| C | 2.46010100  | -0.92359100 | 0.61161100  |
| O | 1.44944800  | -1.65032100 | 1.12534000  |
| N | 3.68825700  | -1.47729800 | 0.39973300  |
| H | 3.92983700  | -2.44711500 | 0.56077700  |
| C | -4.15360400 | 1.67033800  | 0.53904800  |
| H | -3.51824600 | 2.34803200  | 1.11048400  |
| C | -5.83815400 | -0.03482300 | -0.91544000 |
| C | -6.32013400 | 1.16950900  | -0.44361600 |
| H | -7.35462000 | 1.46303900  | -0.63417800 |
| C | -5.46576500 | 2.02652400  | 0.29161300  |
| H | -5.84757300 | 2.97863100  | 0.66736000  |
| H | -6.48705700 | -0.70639100 | -1.48381100 |



### III. Copies of NMR spectra

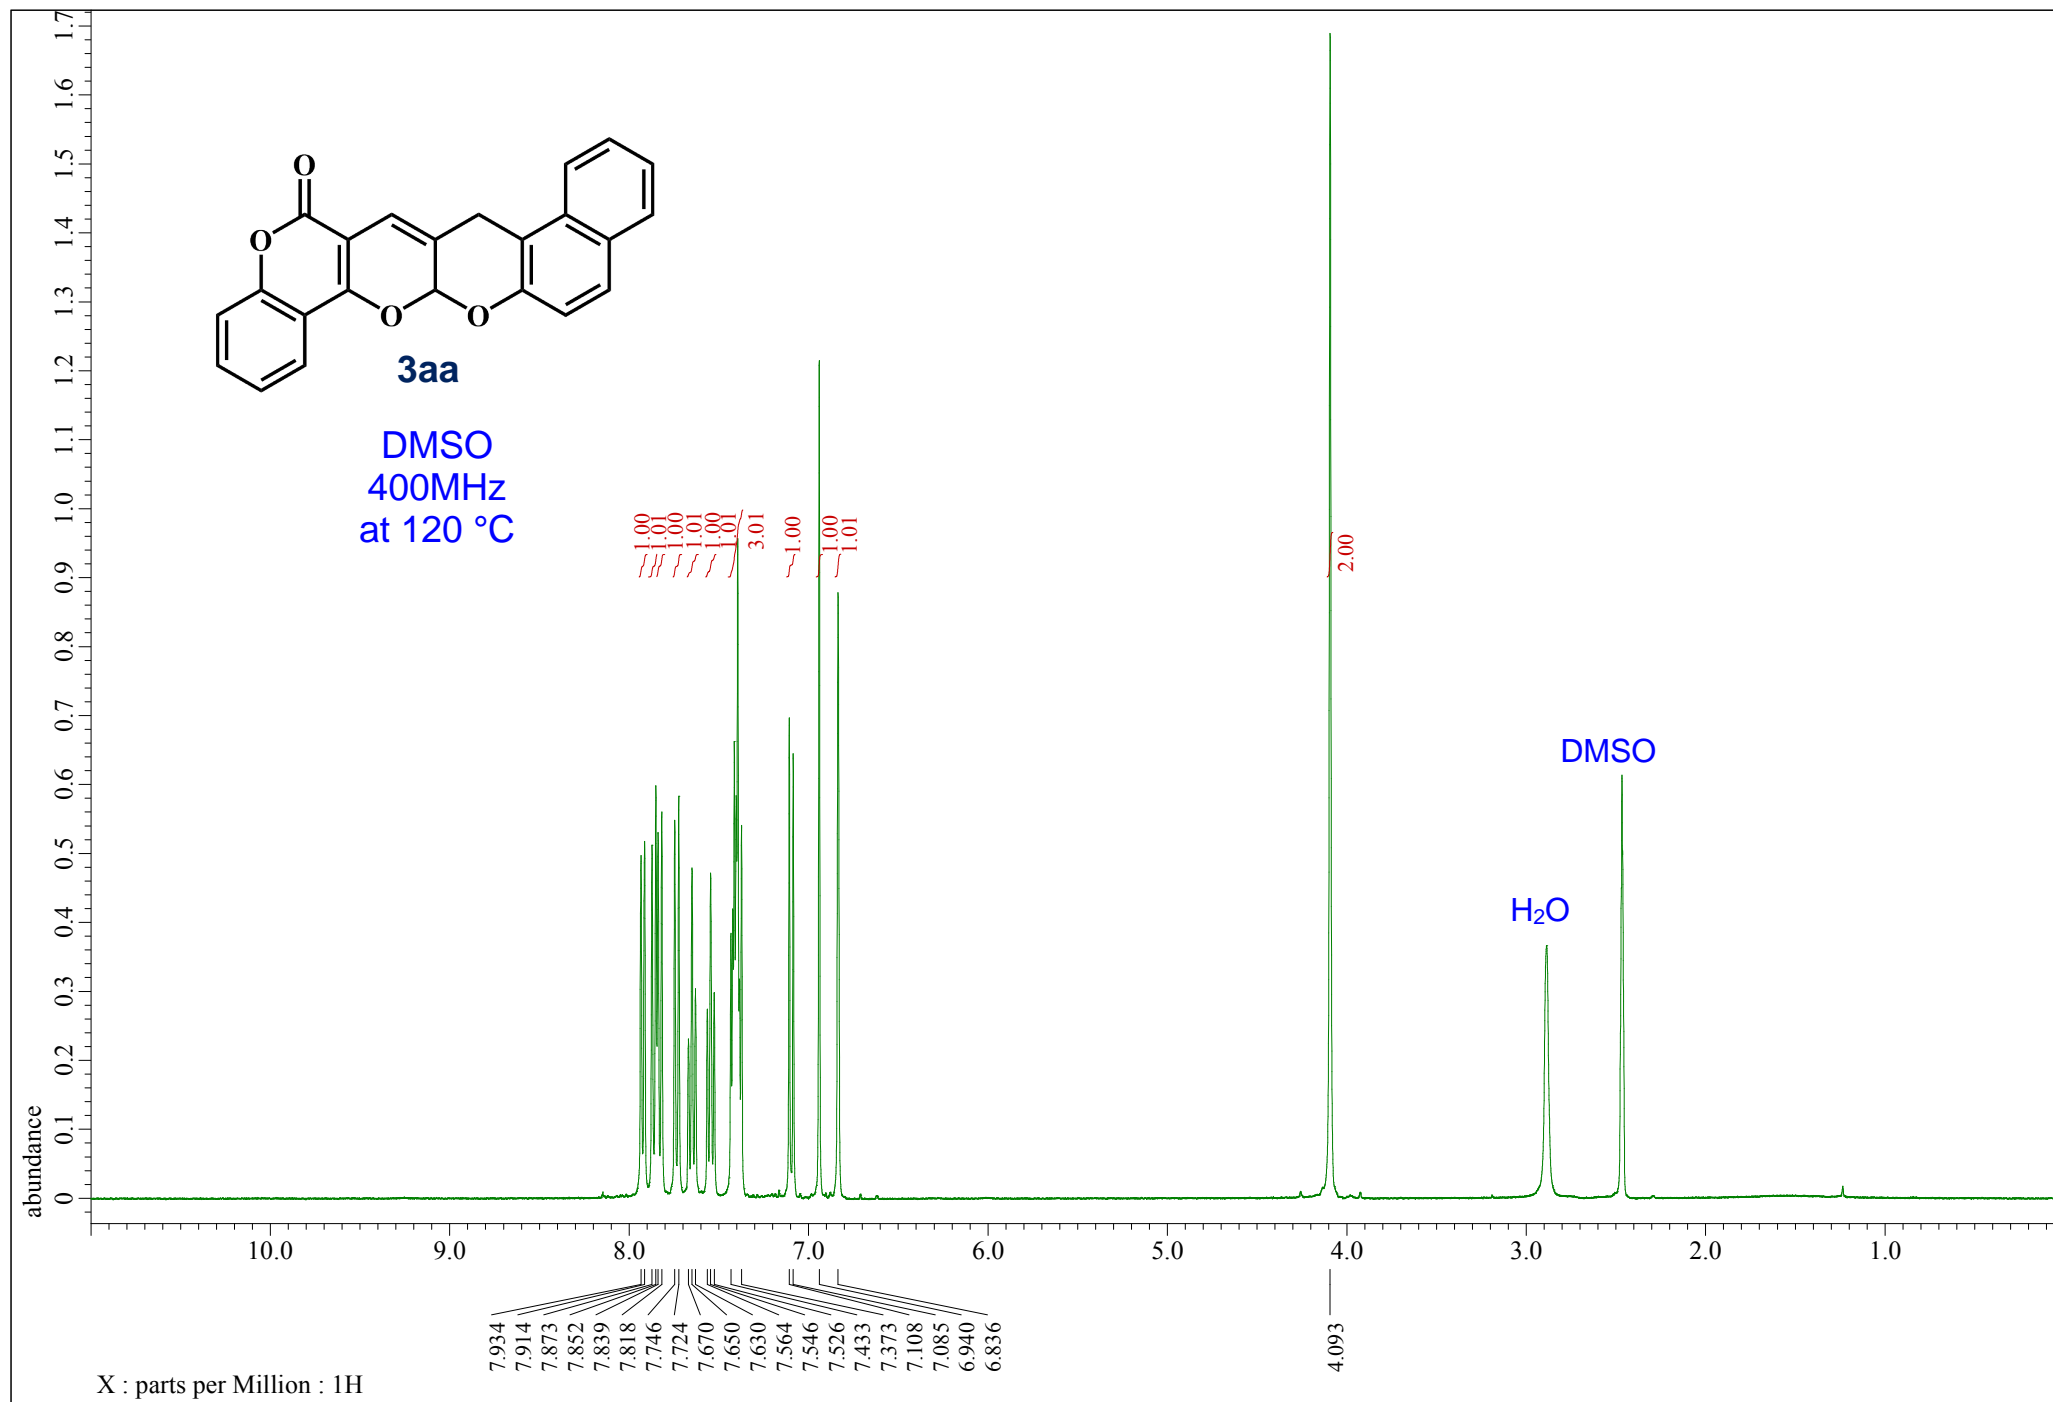

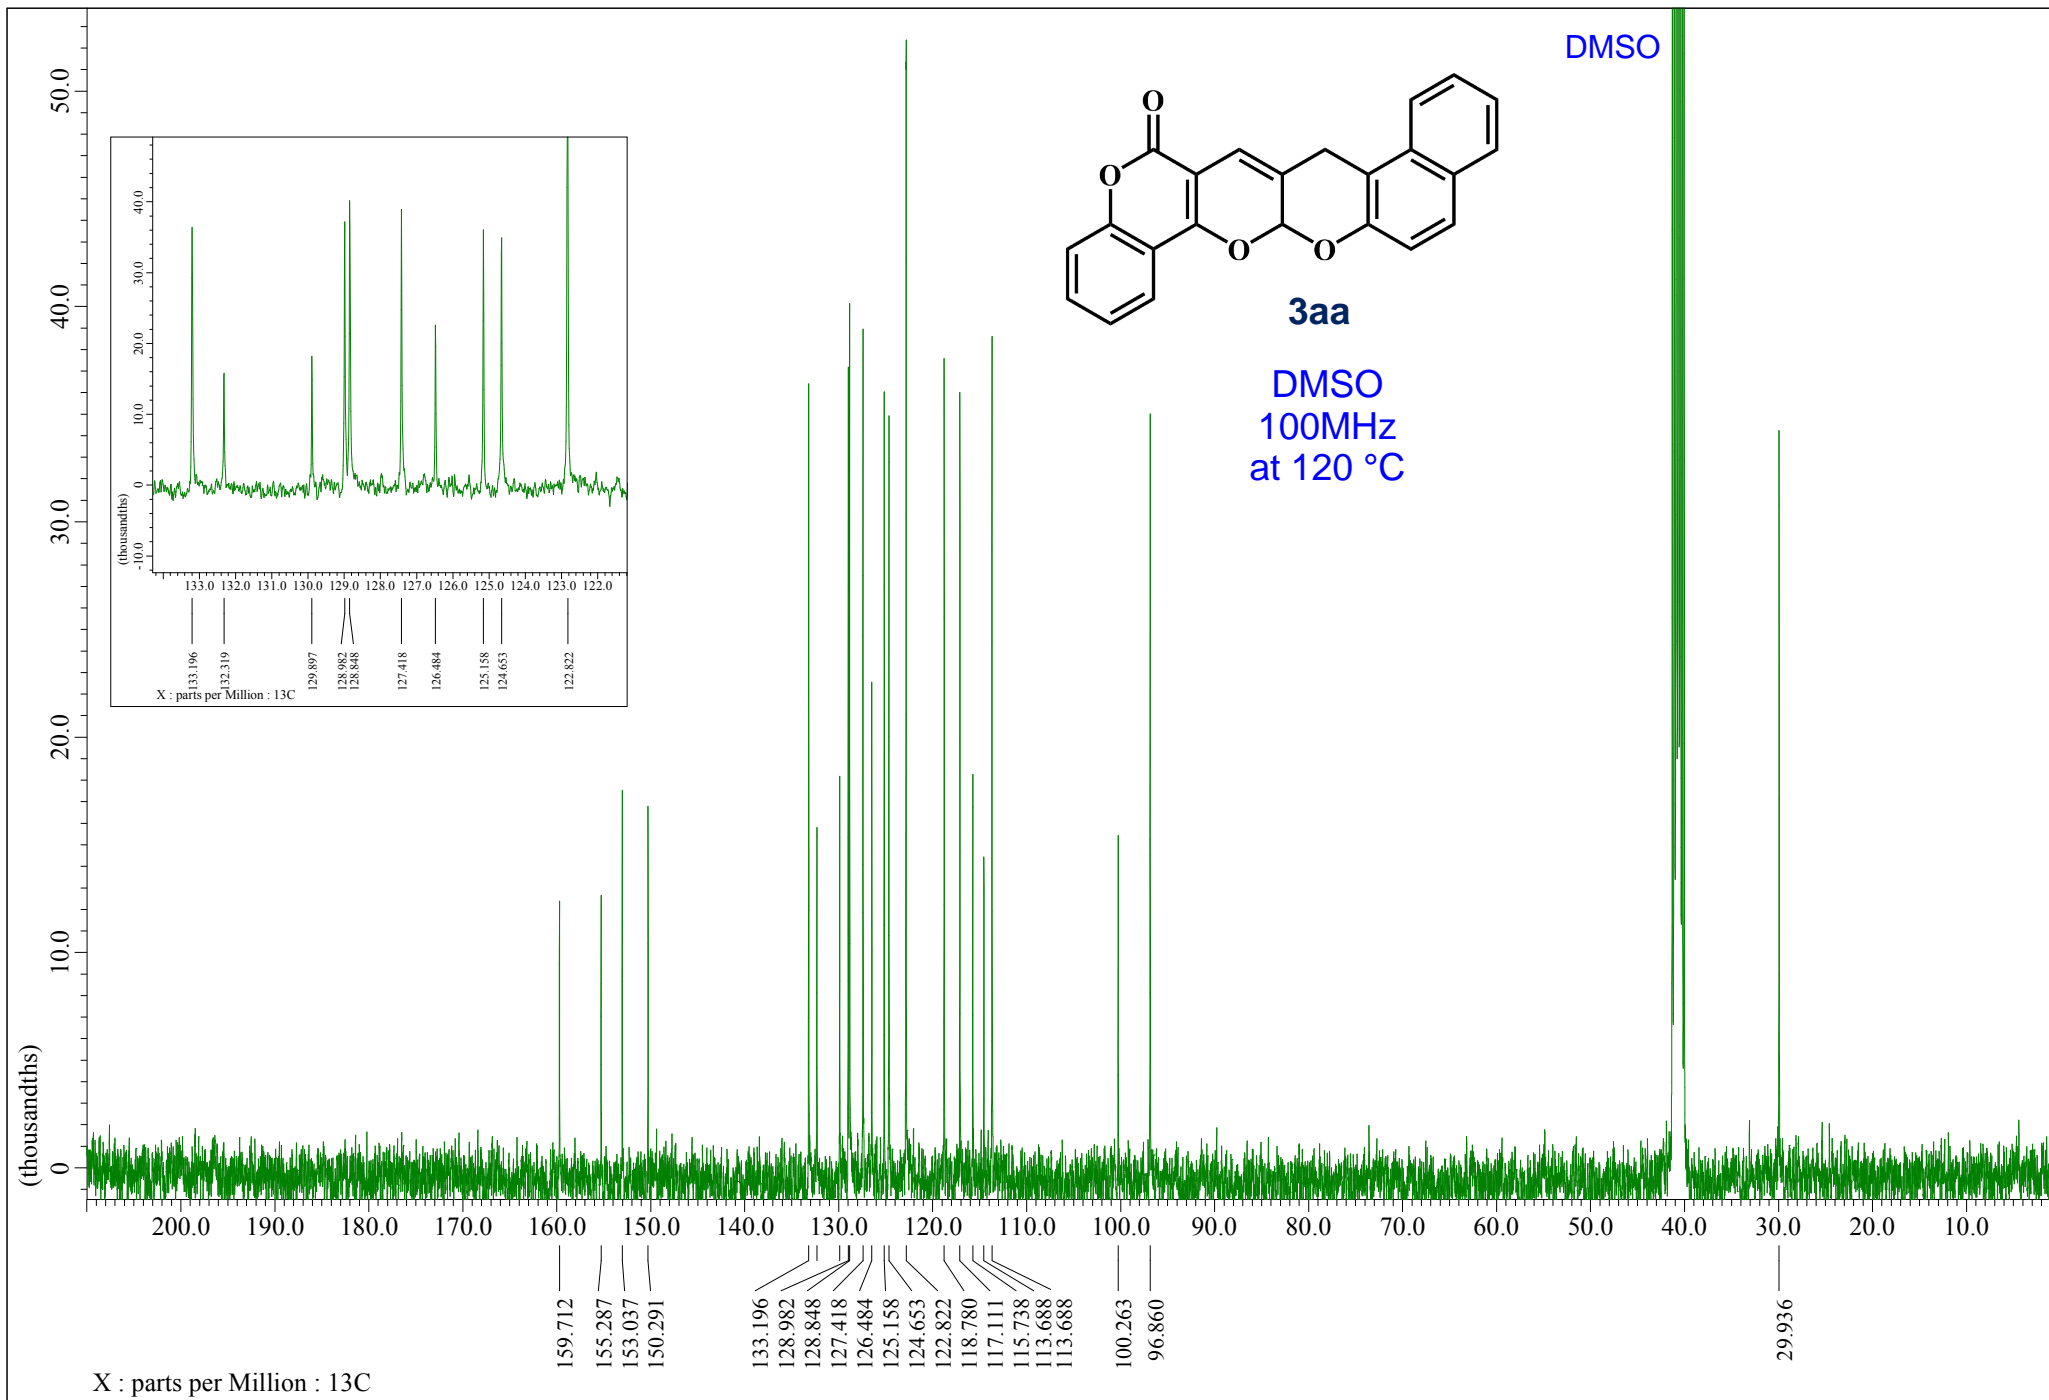

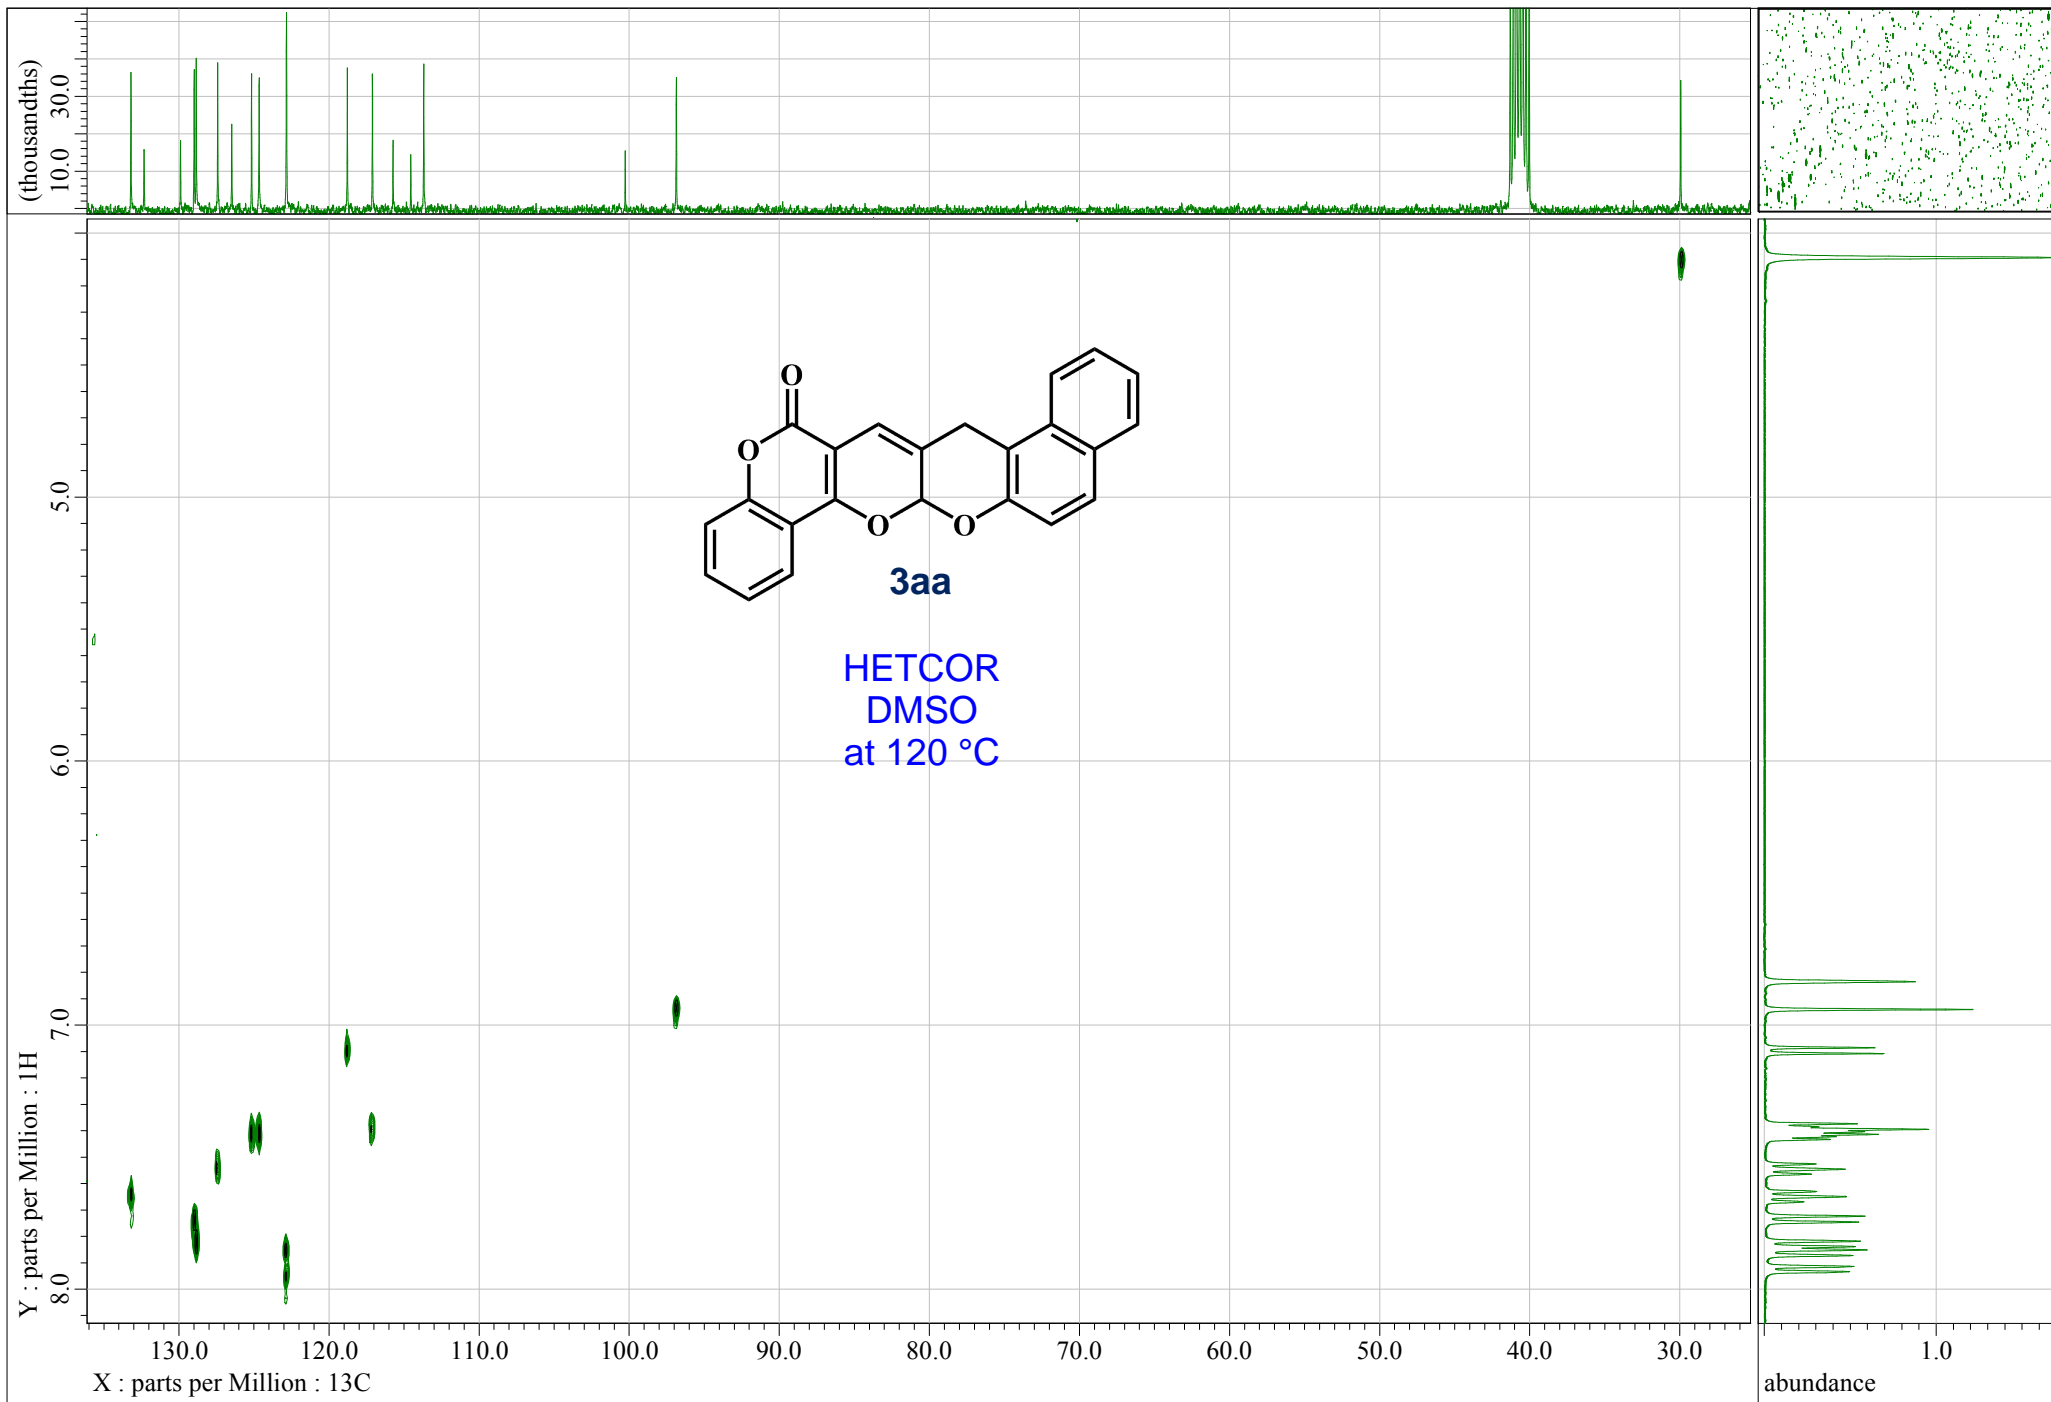

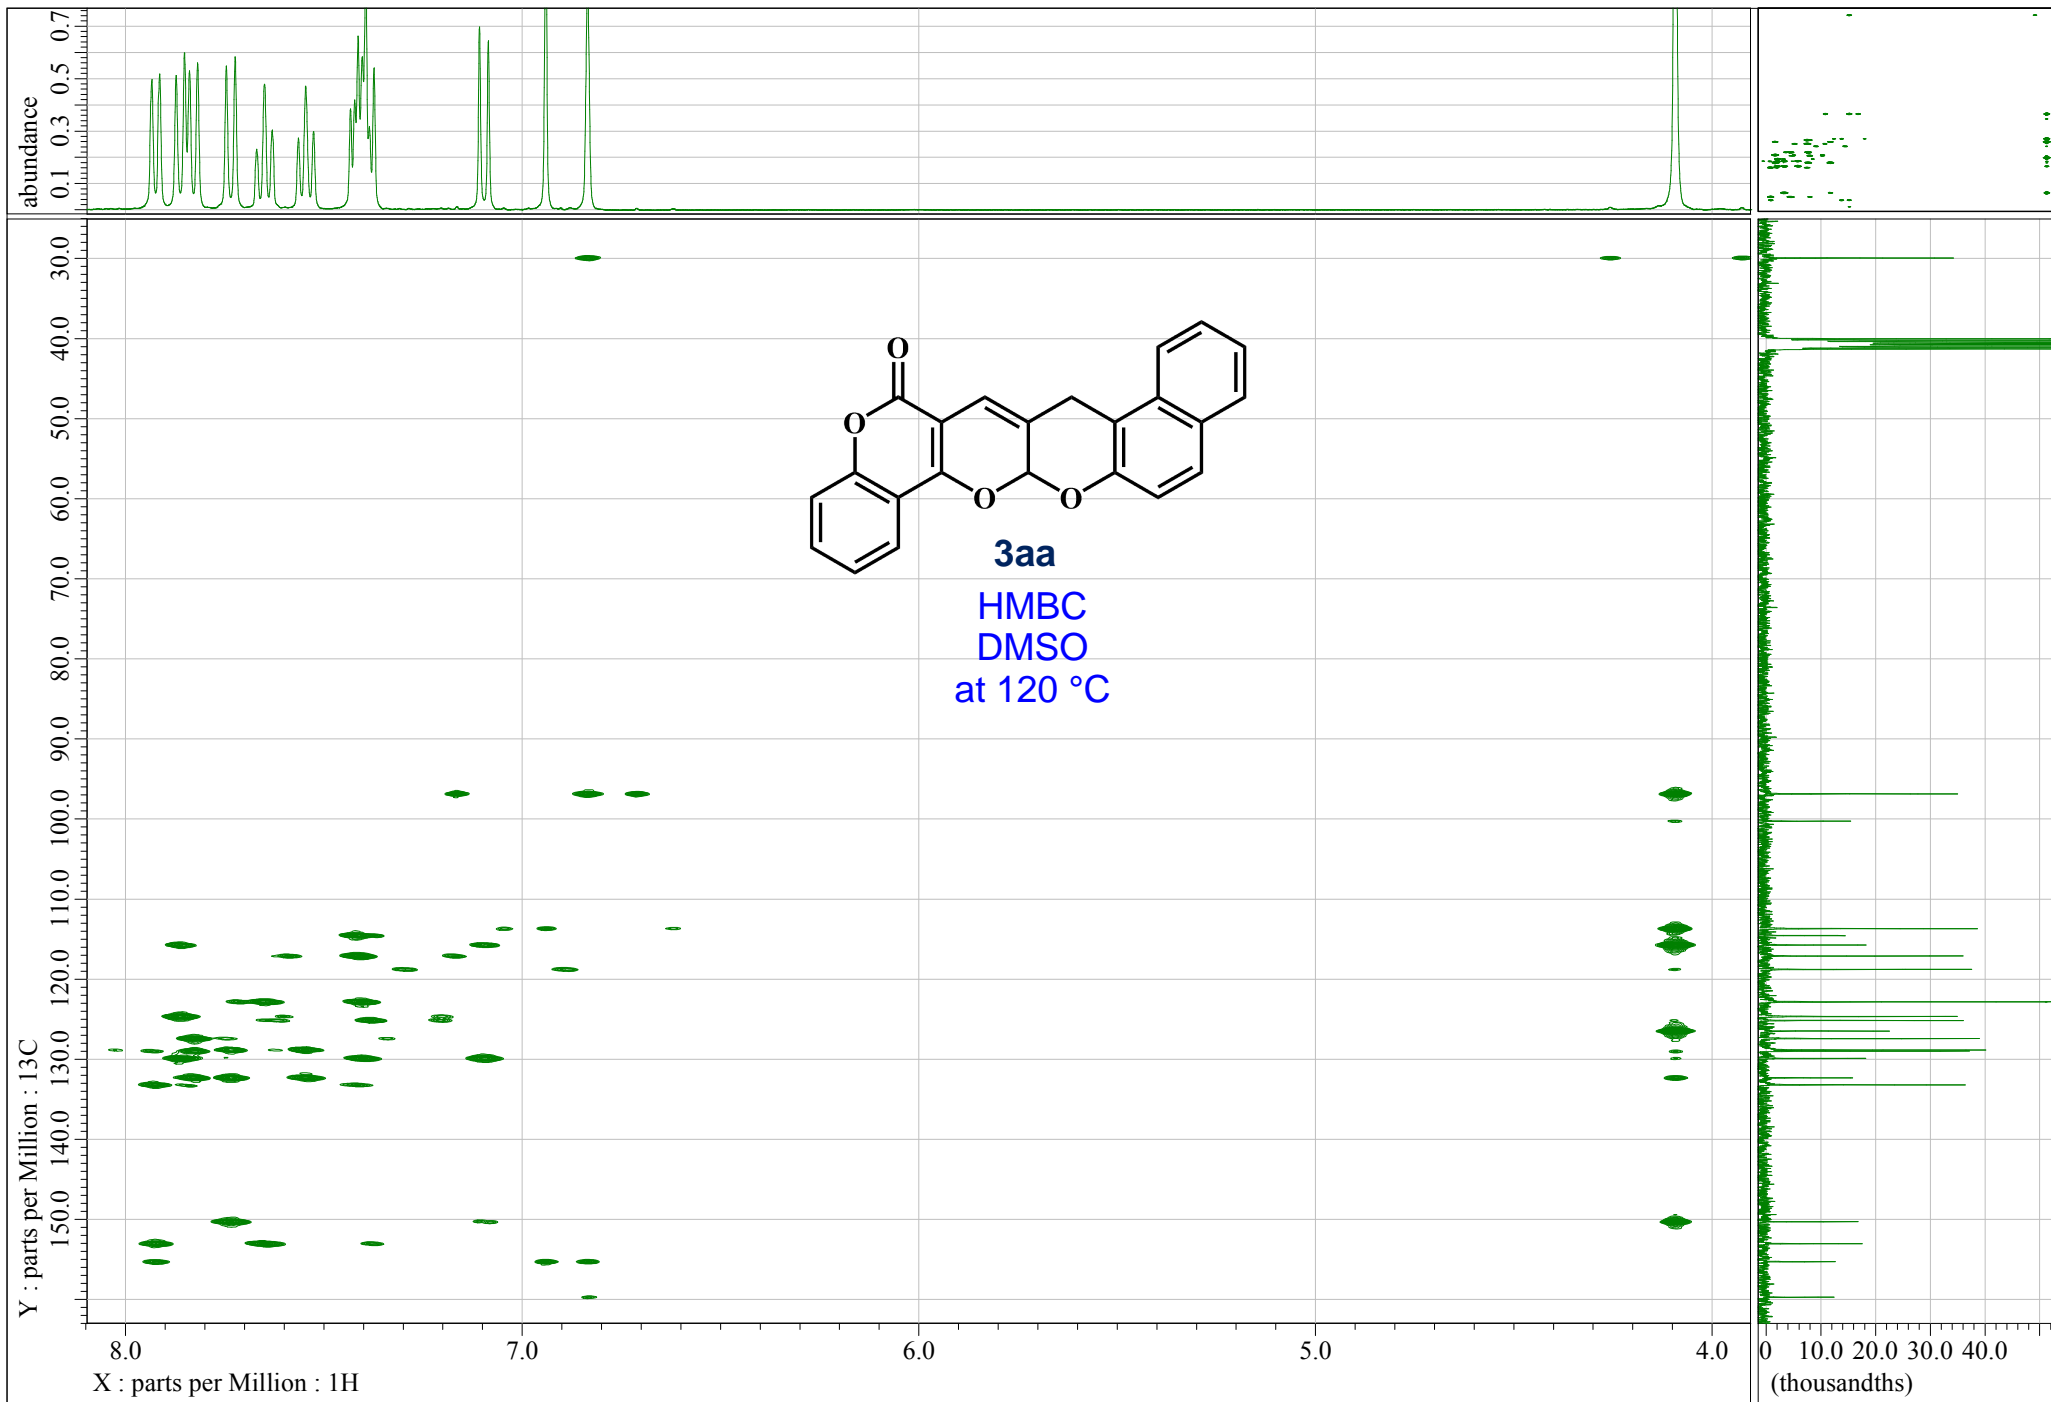

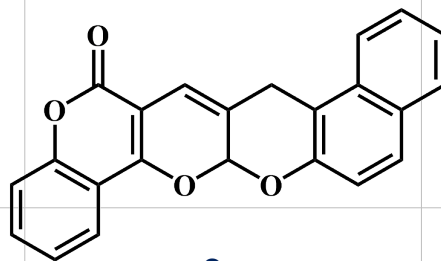

**3aa**  
NOESY  
DMSO  
at 120 °C

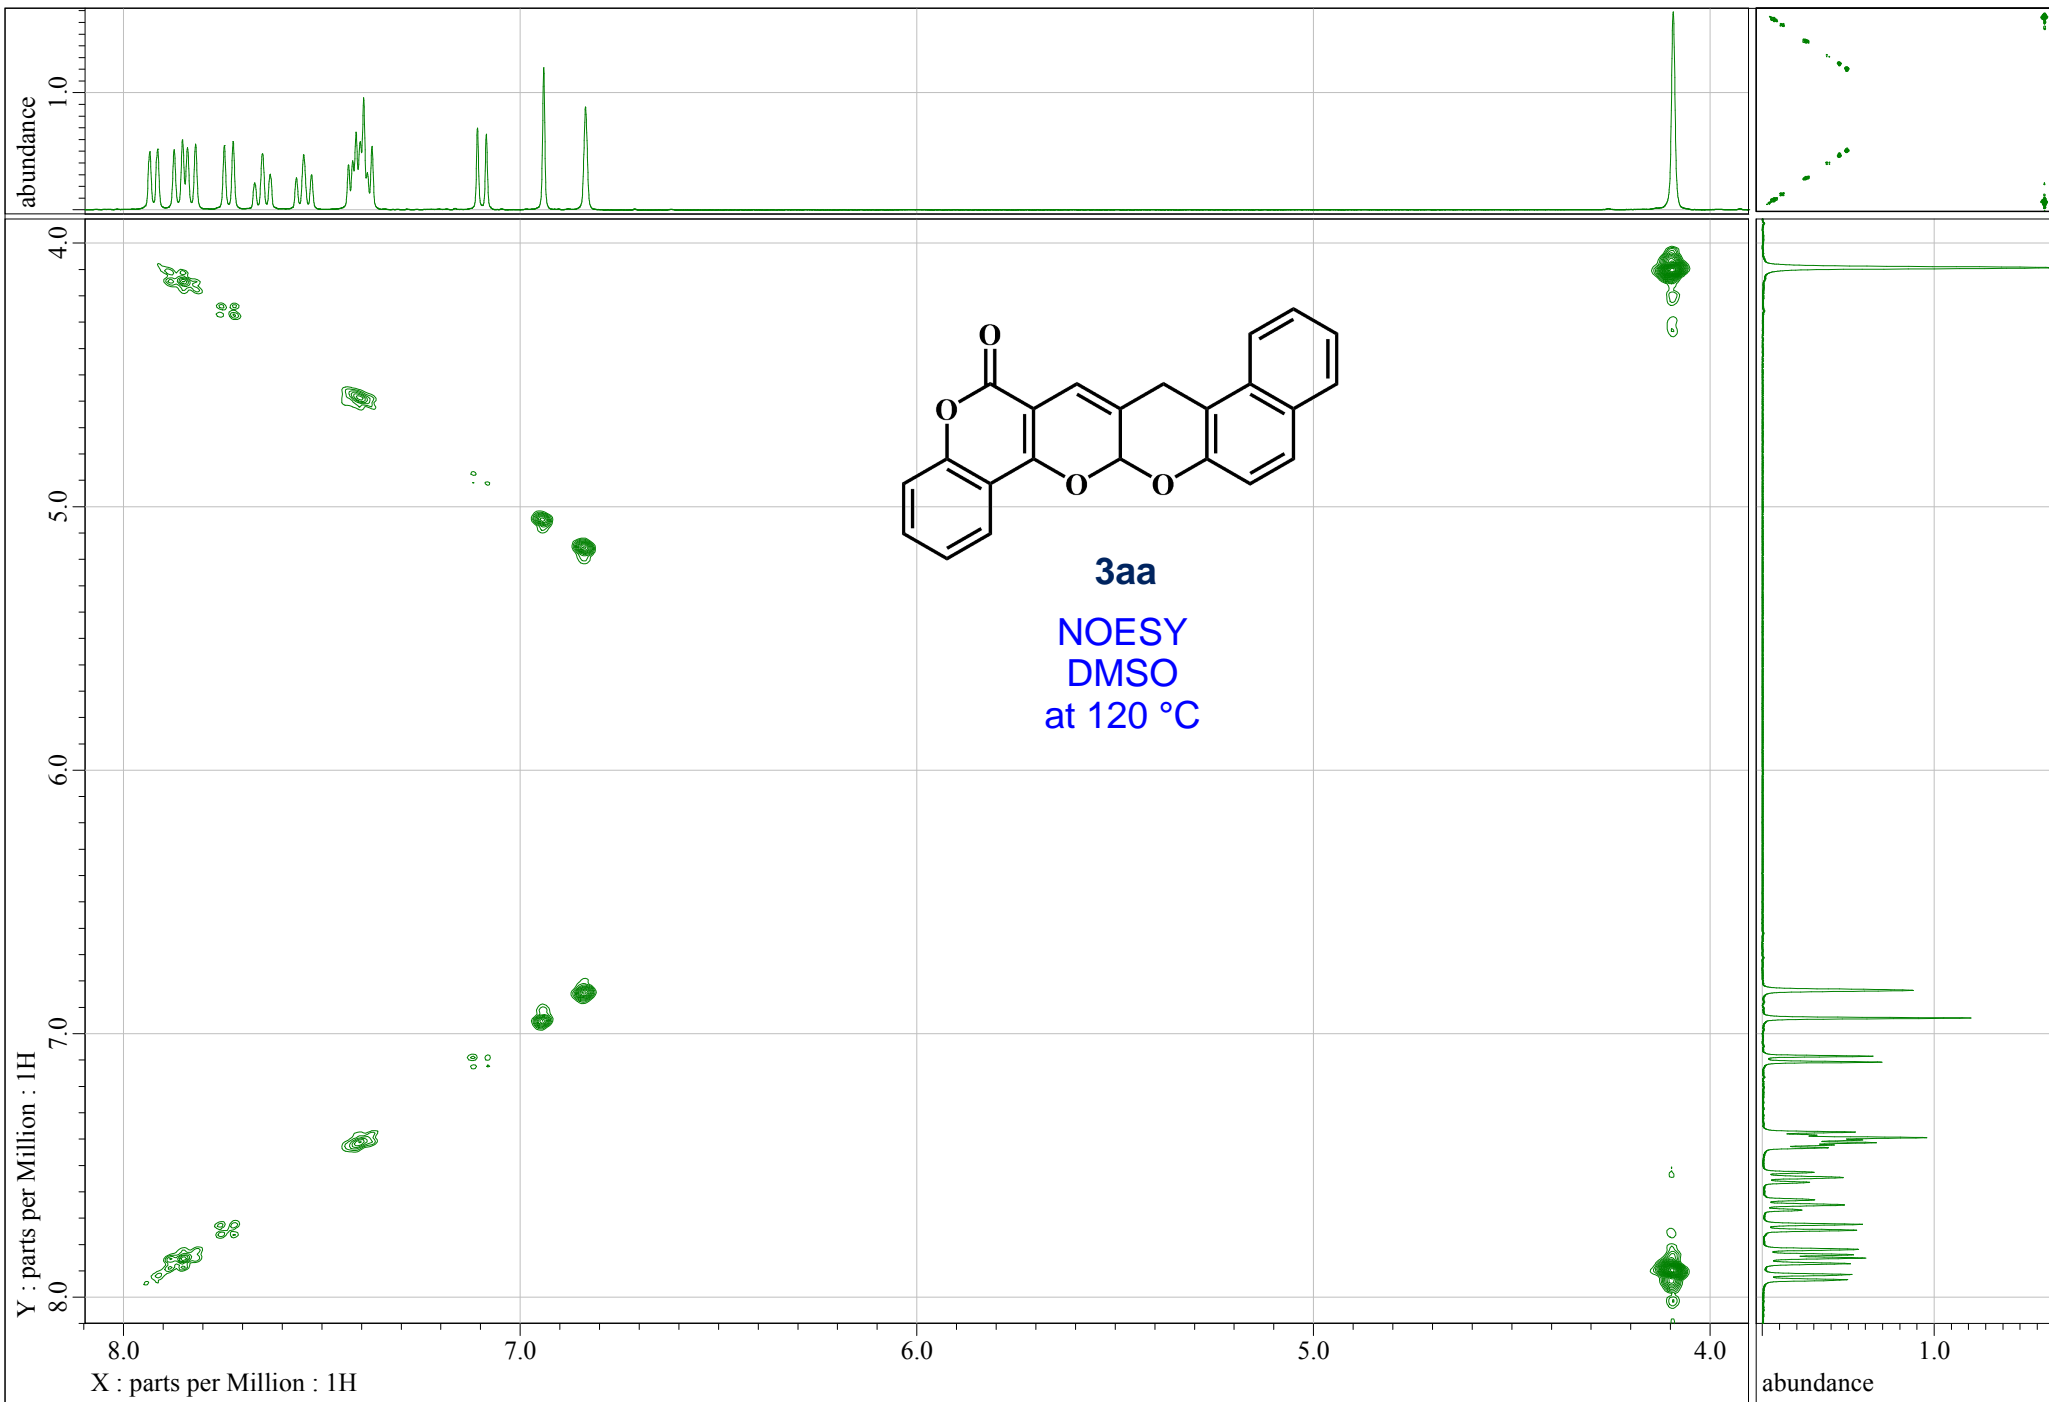

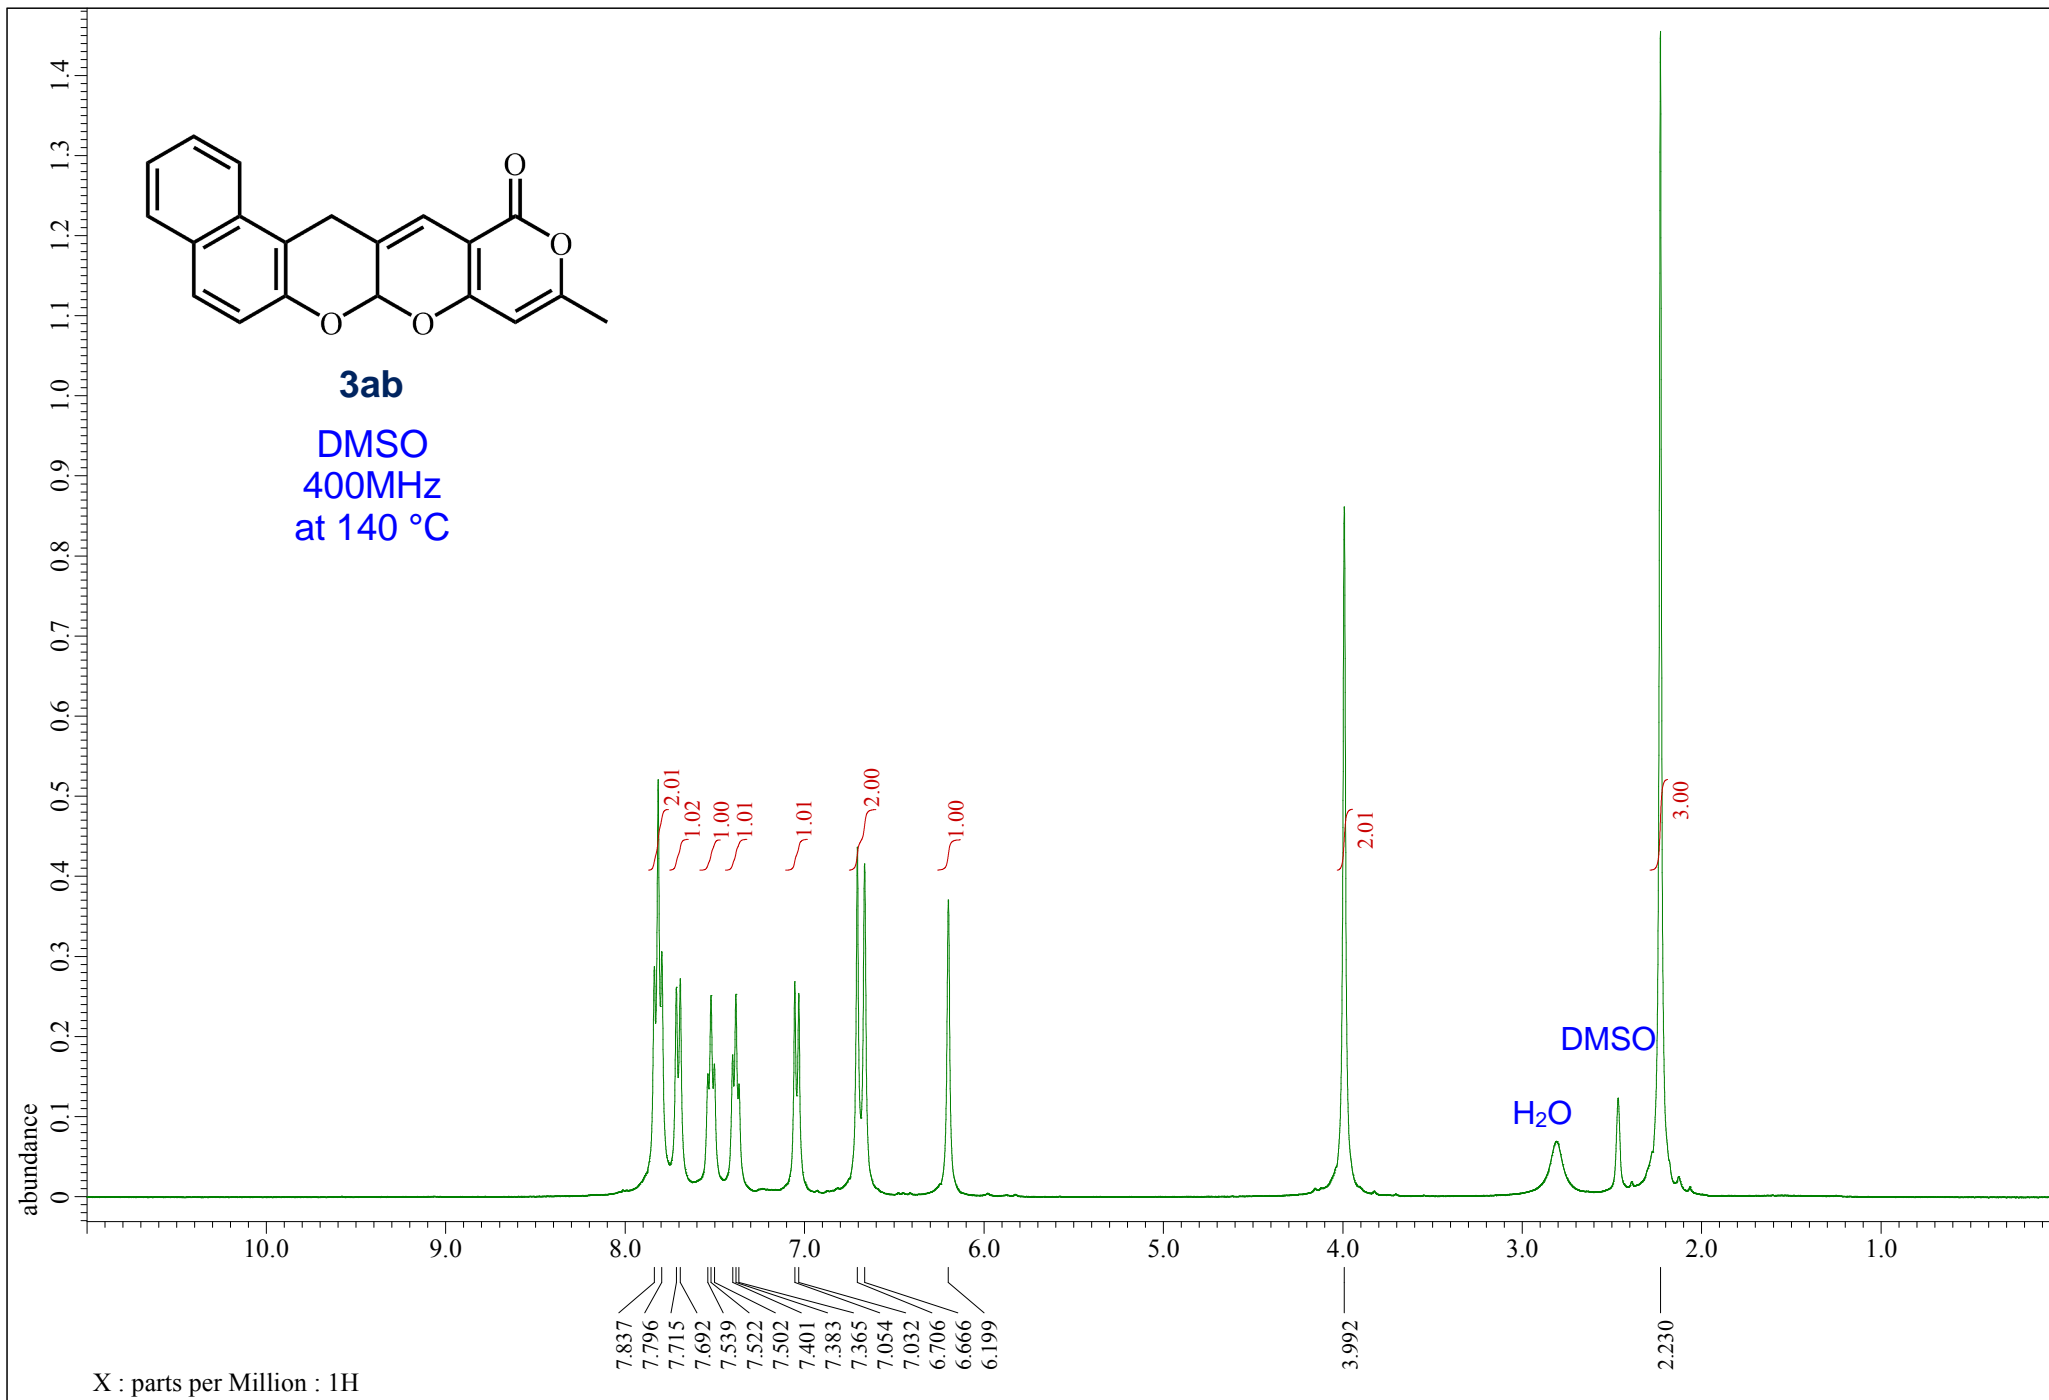

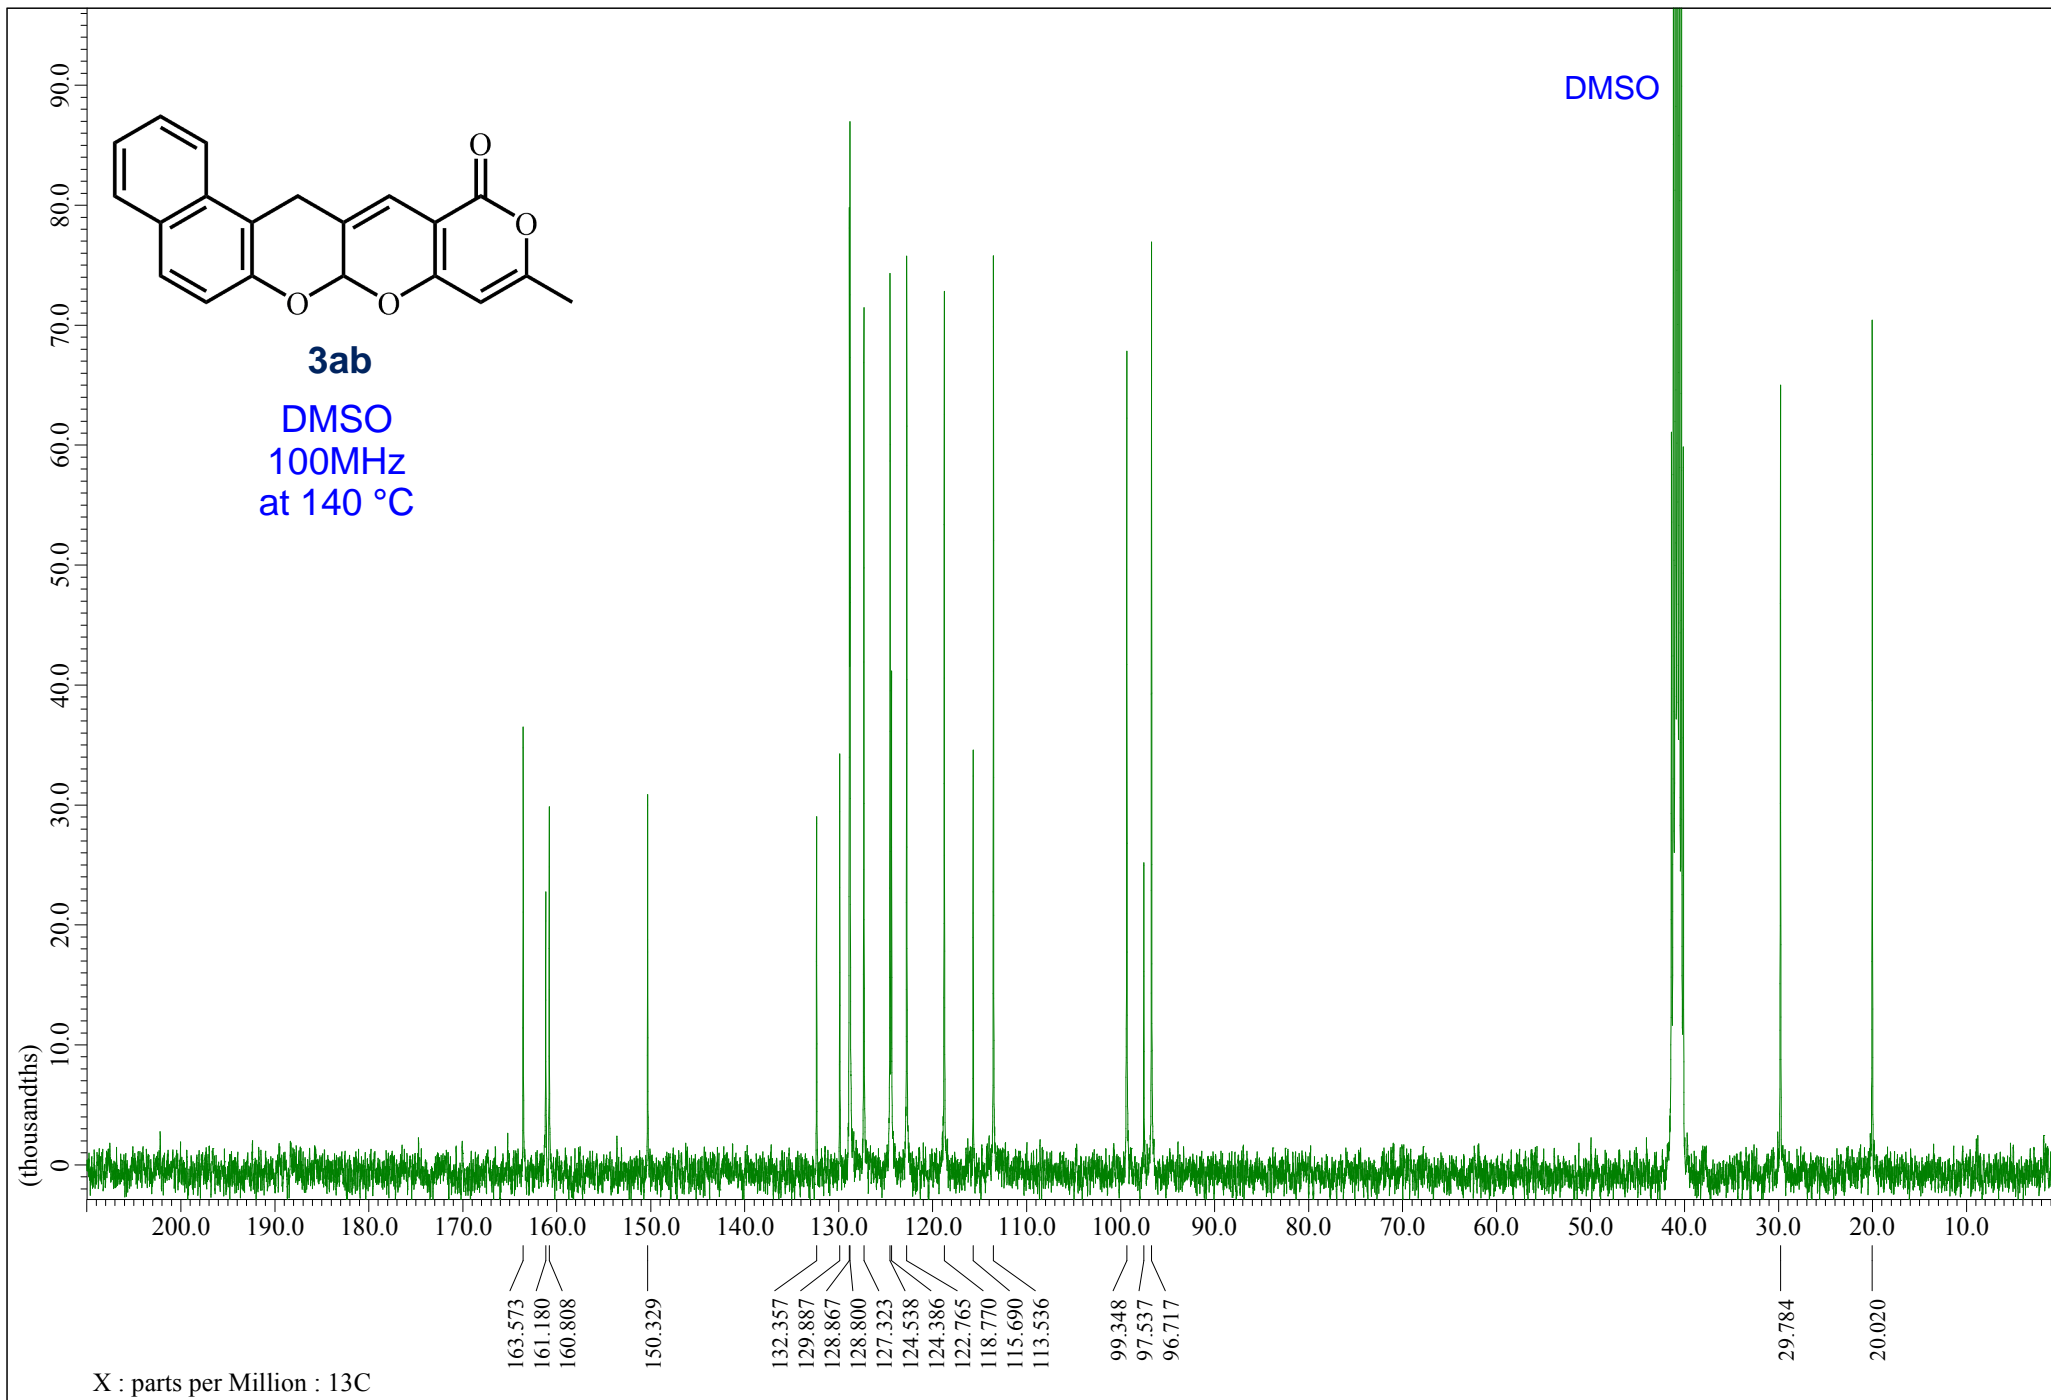

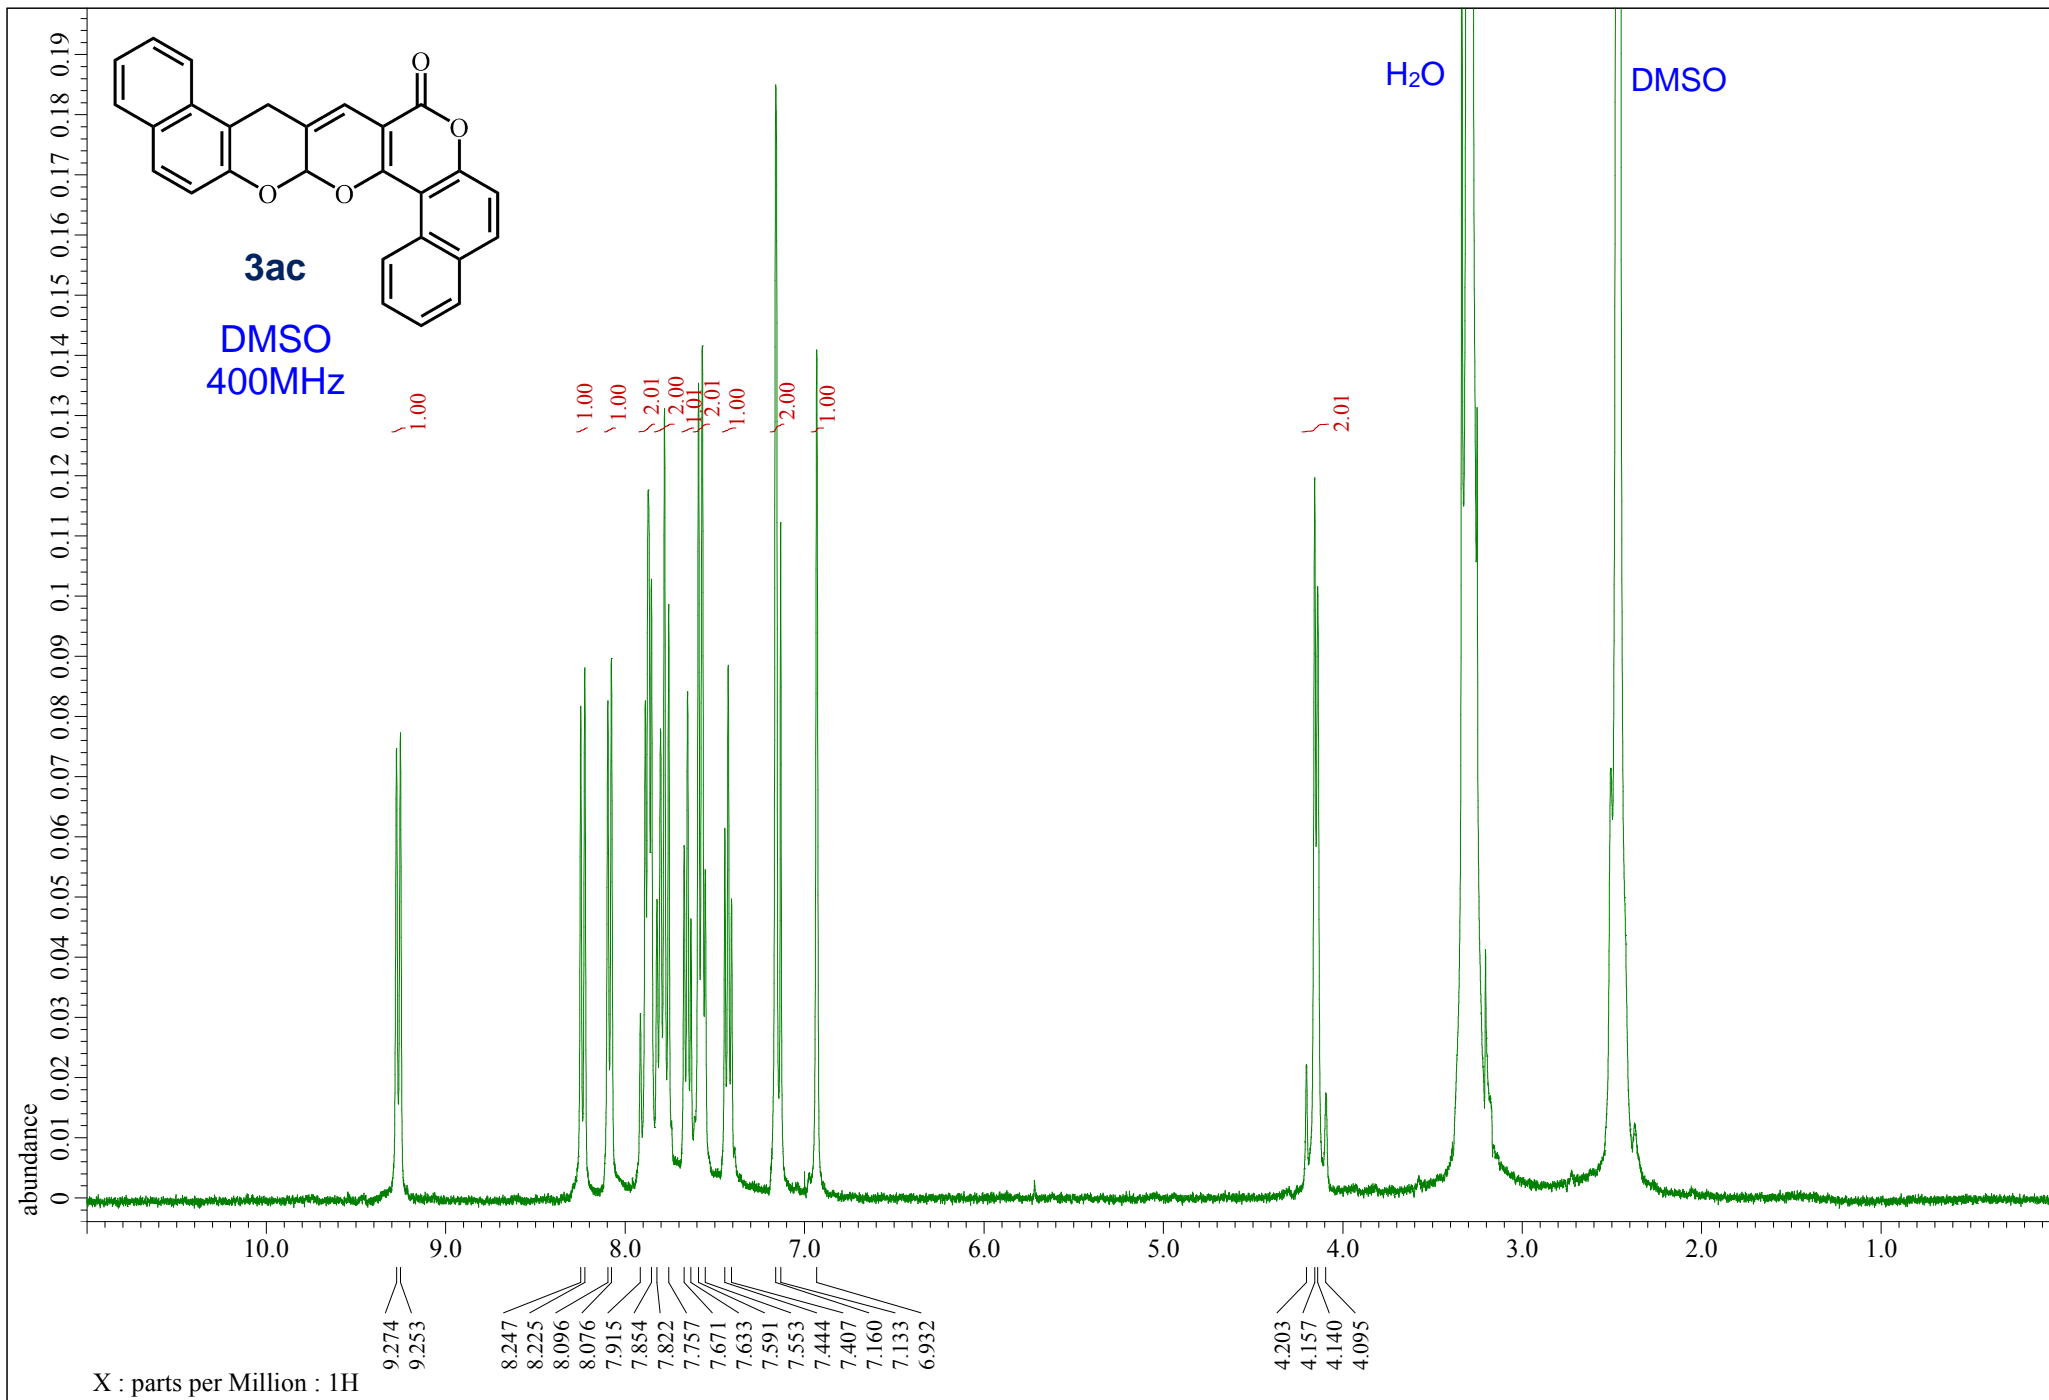



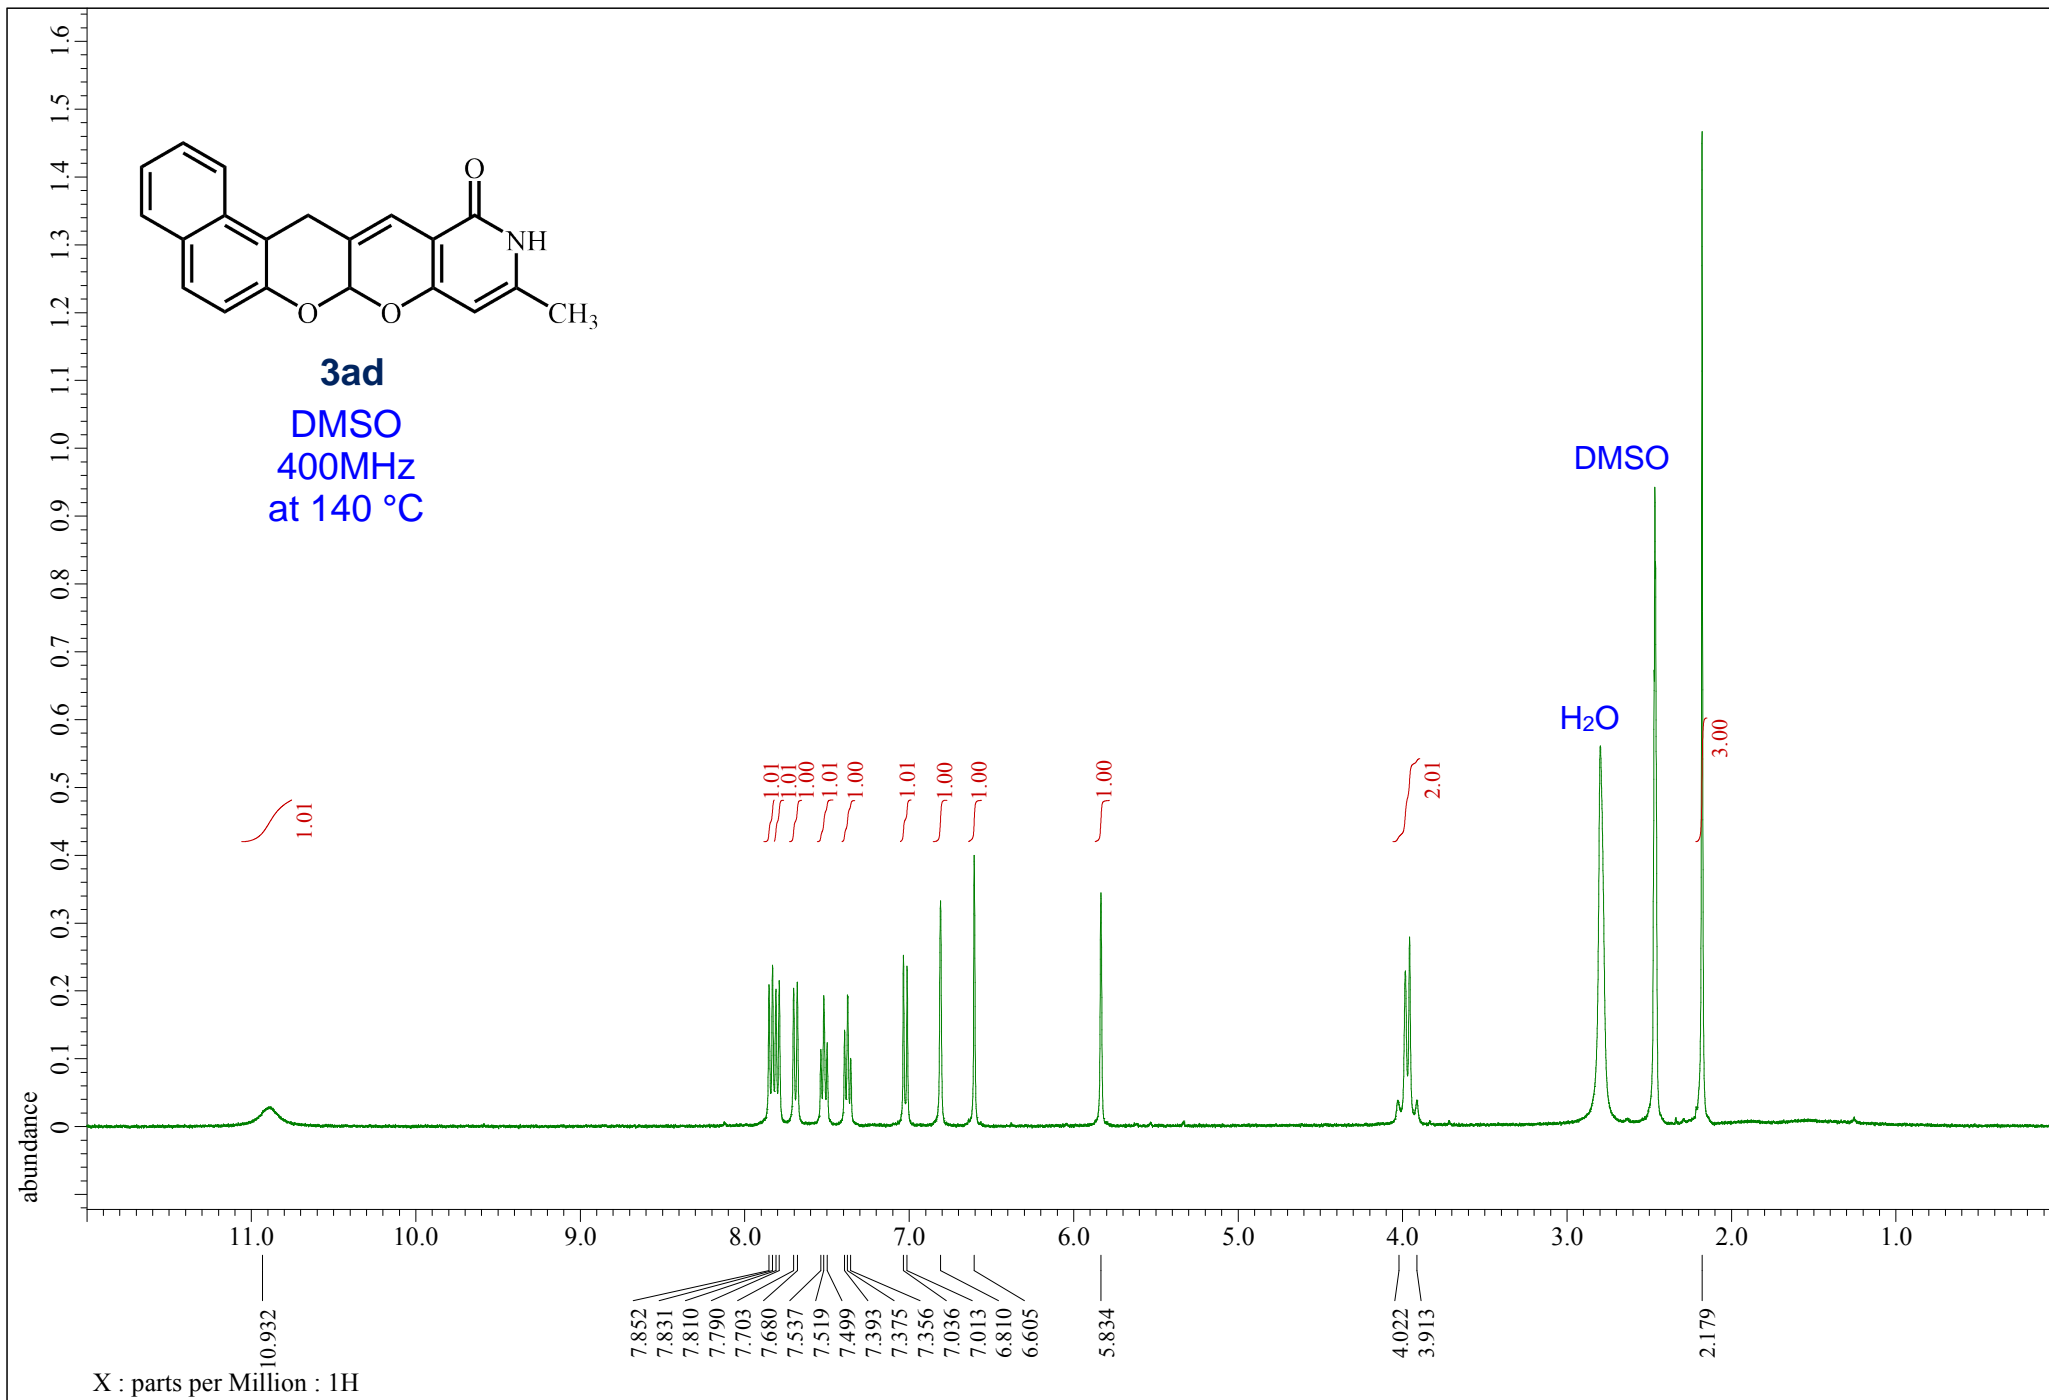

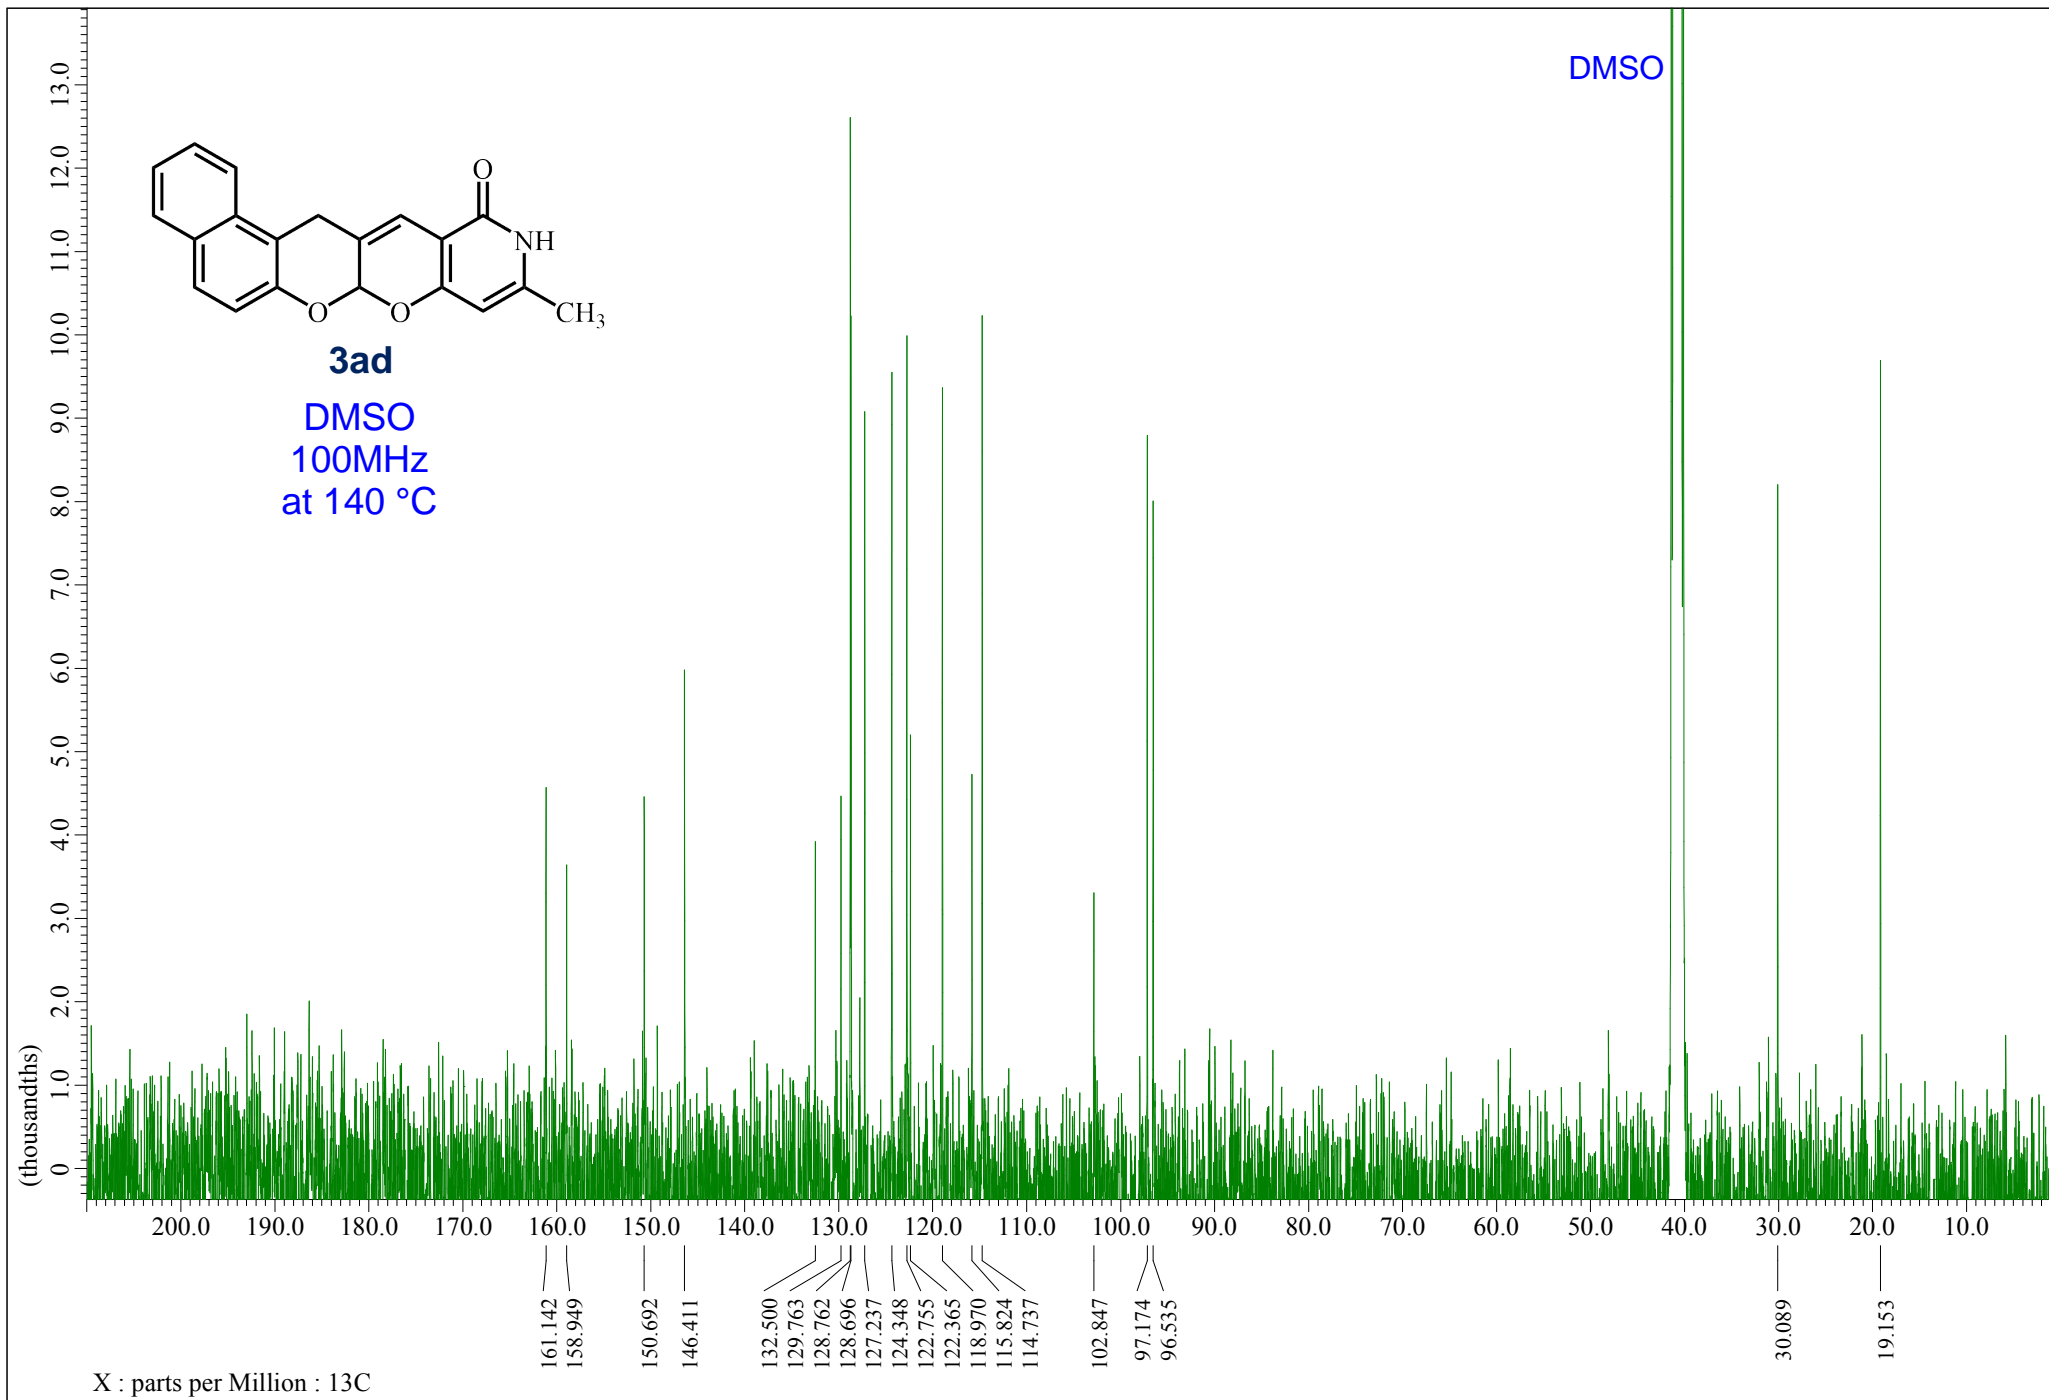

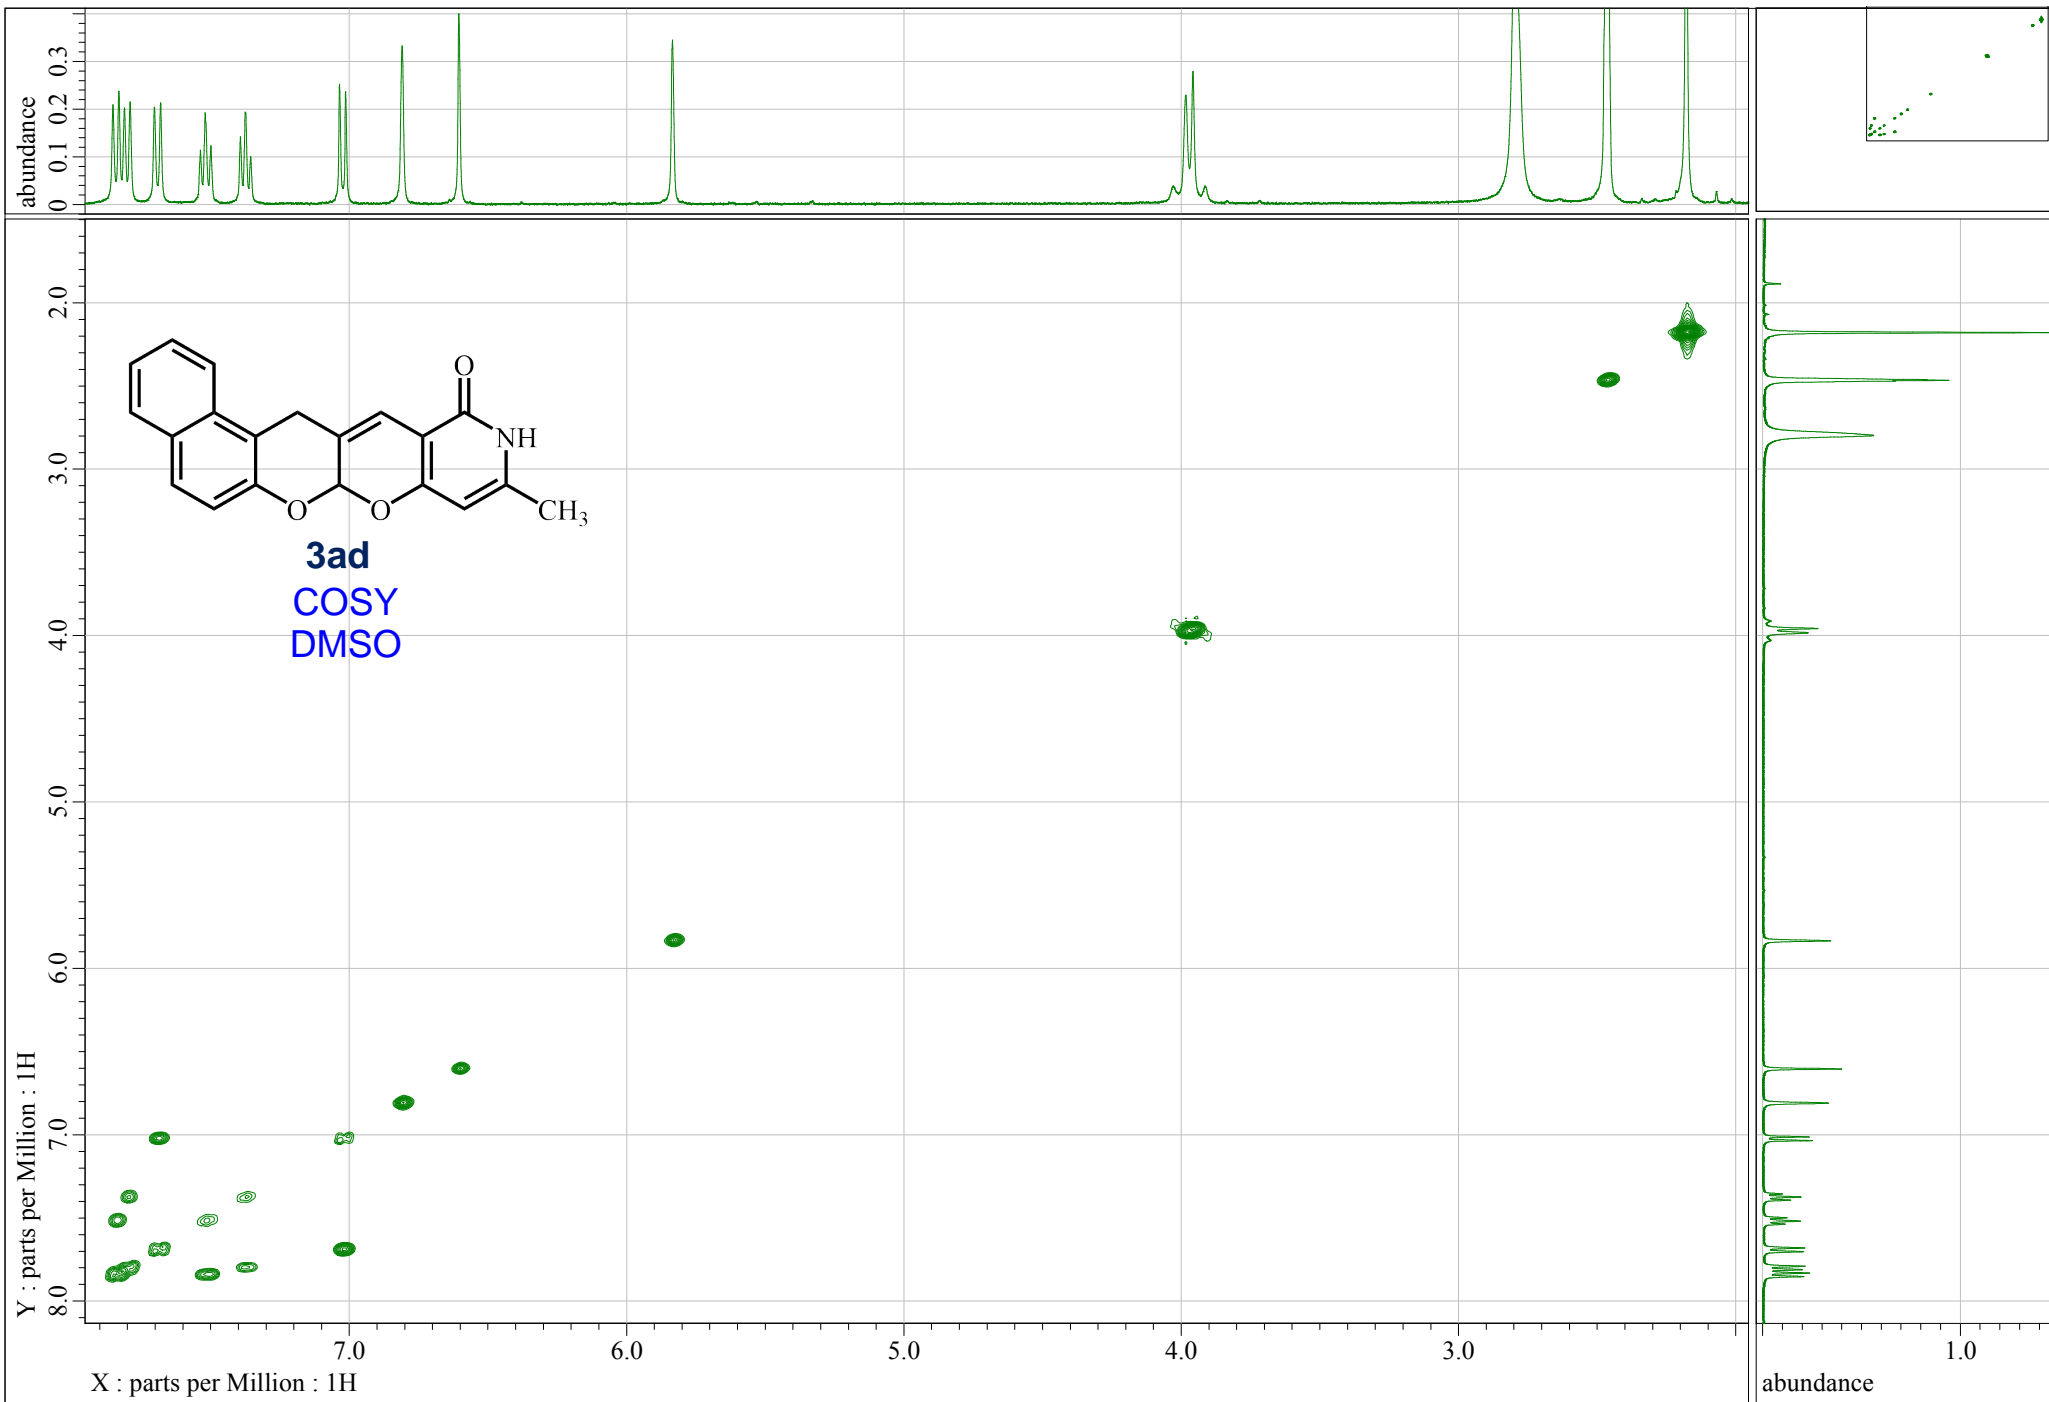

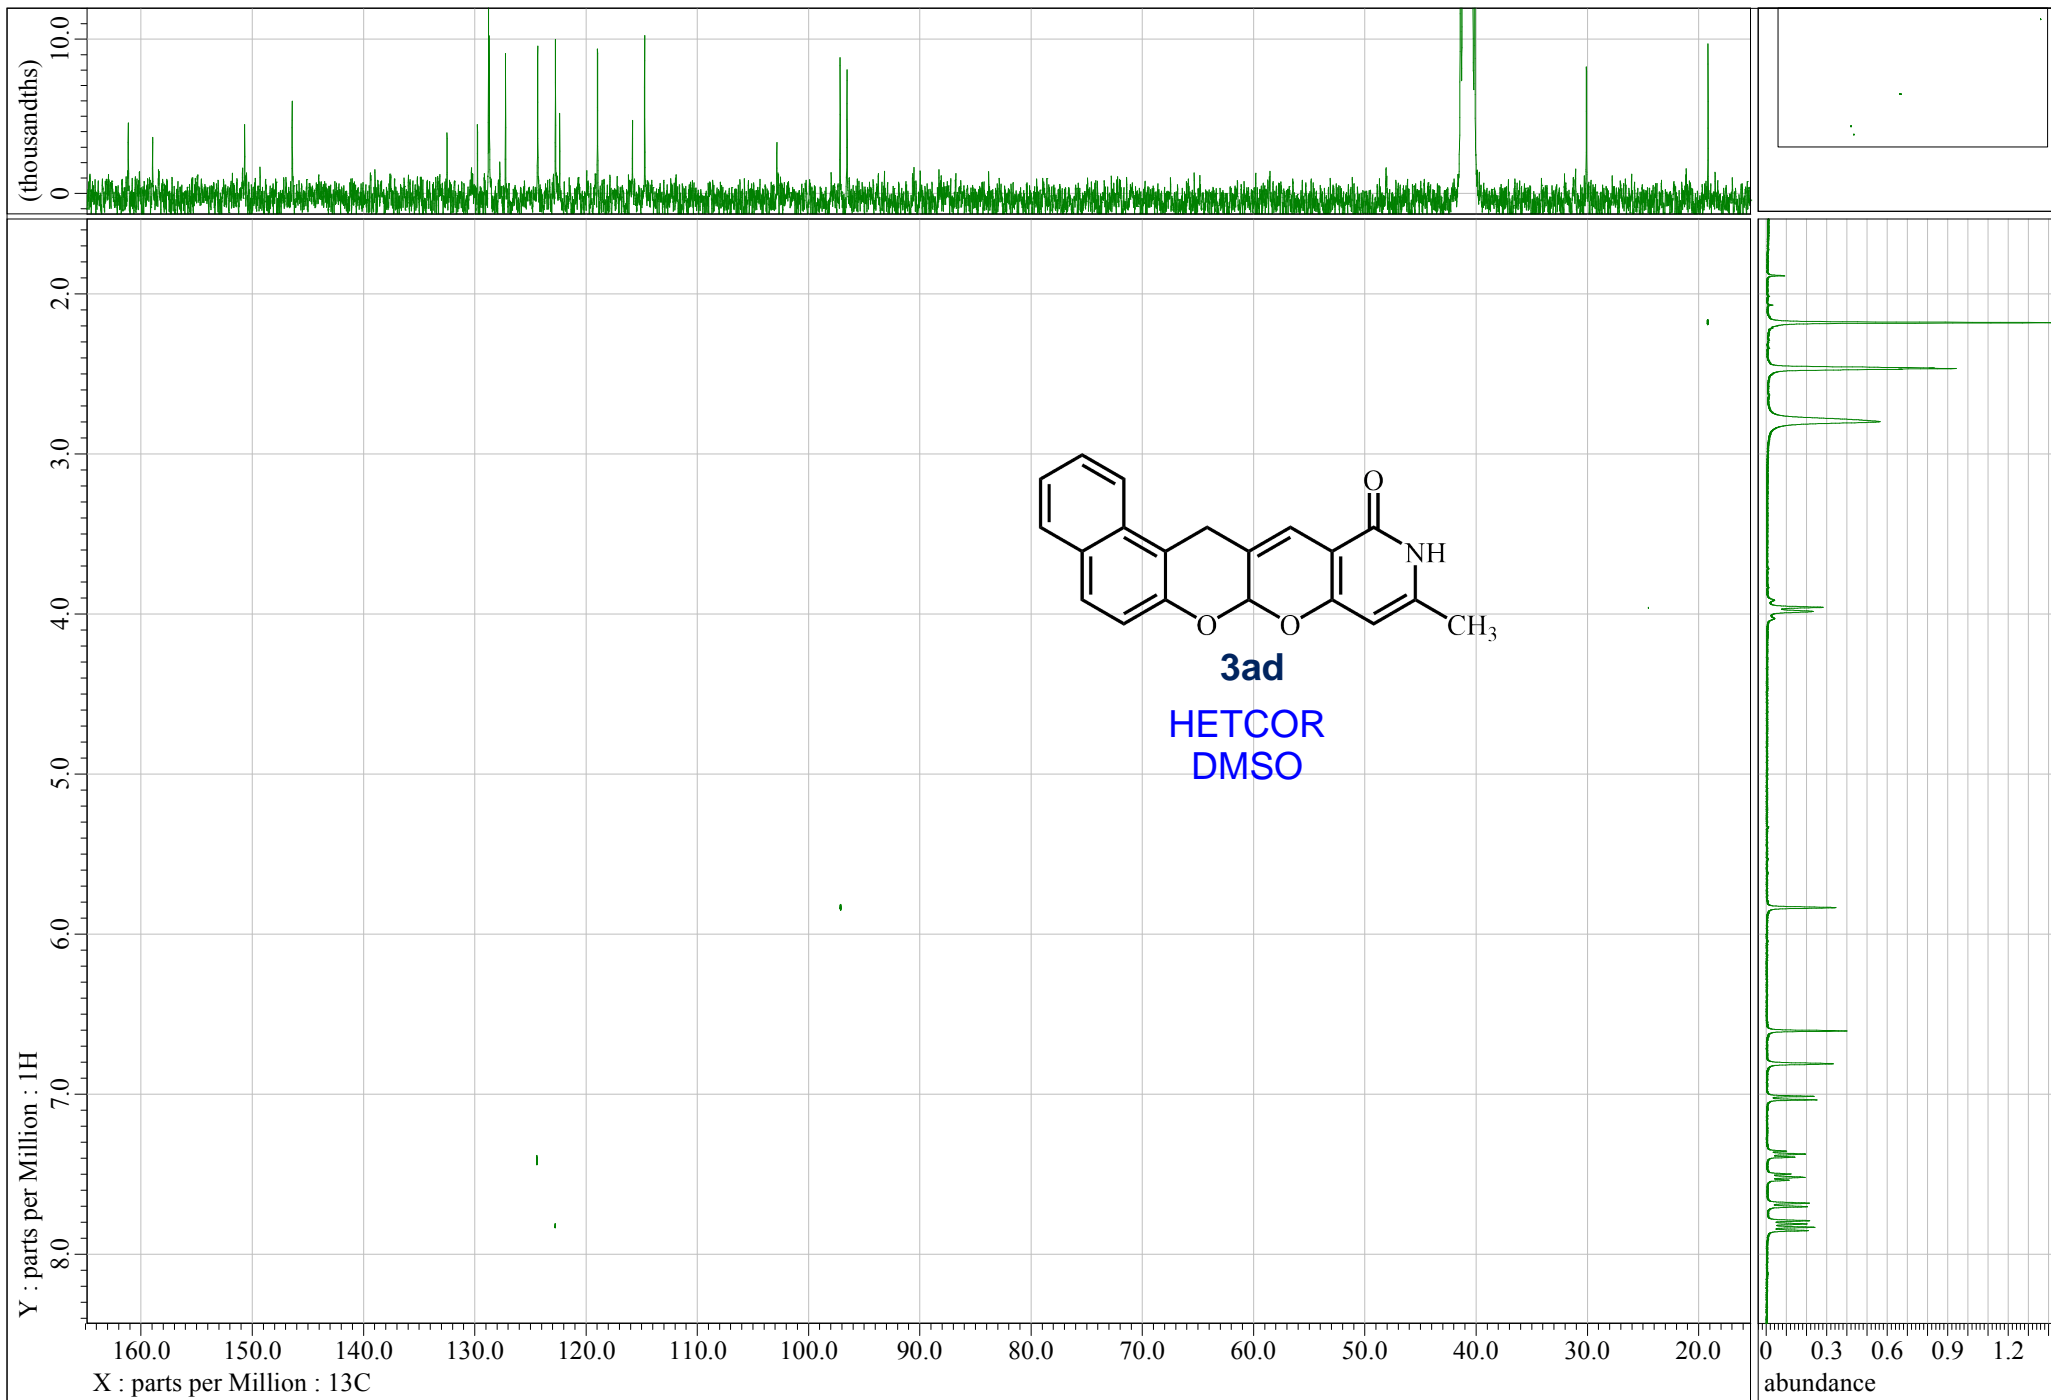

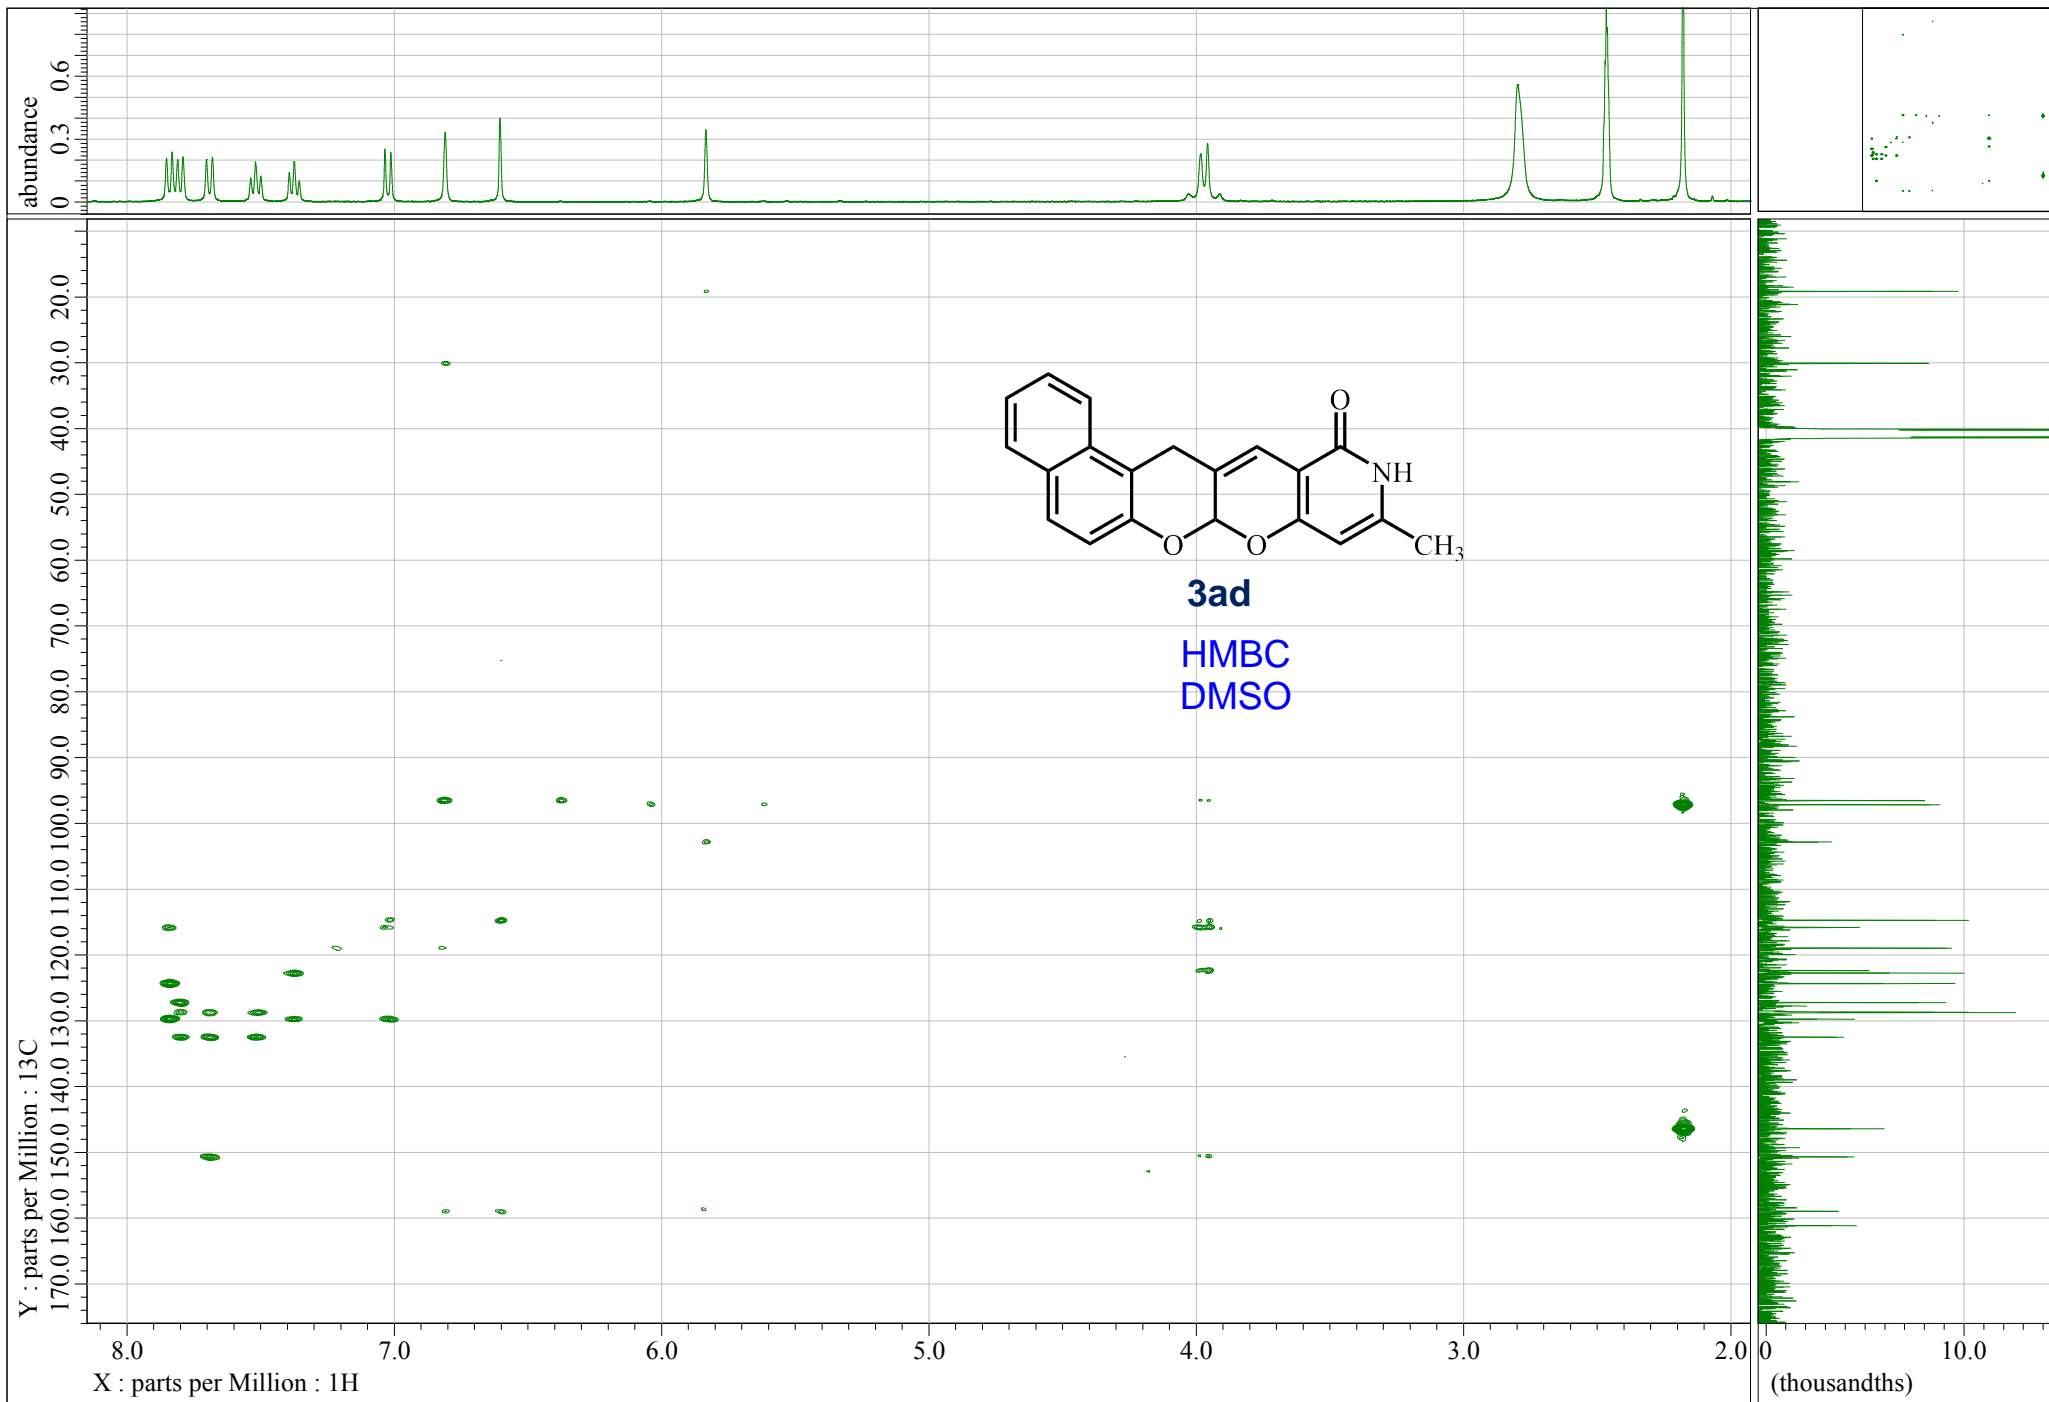

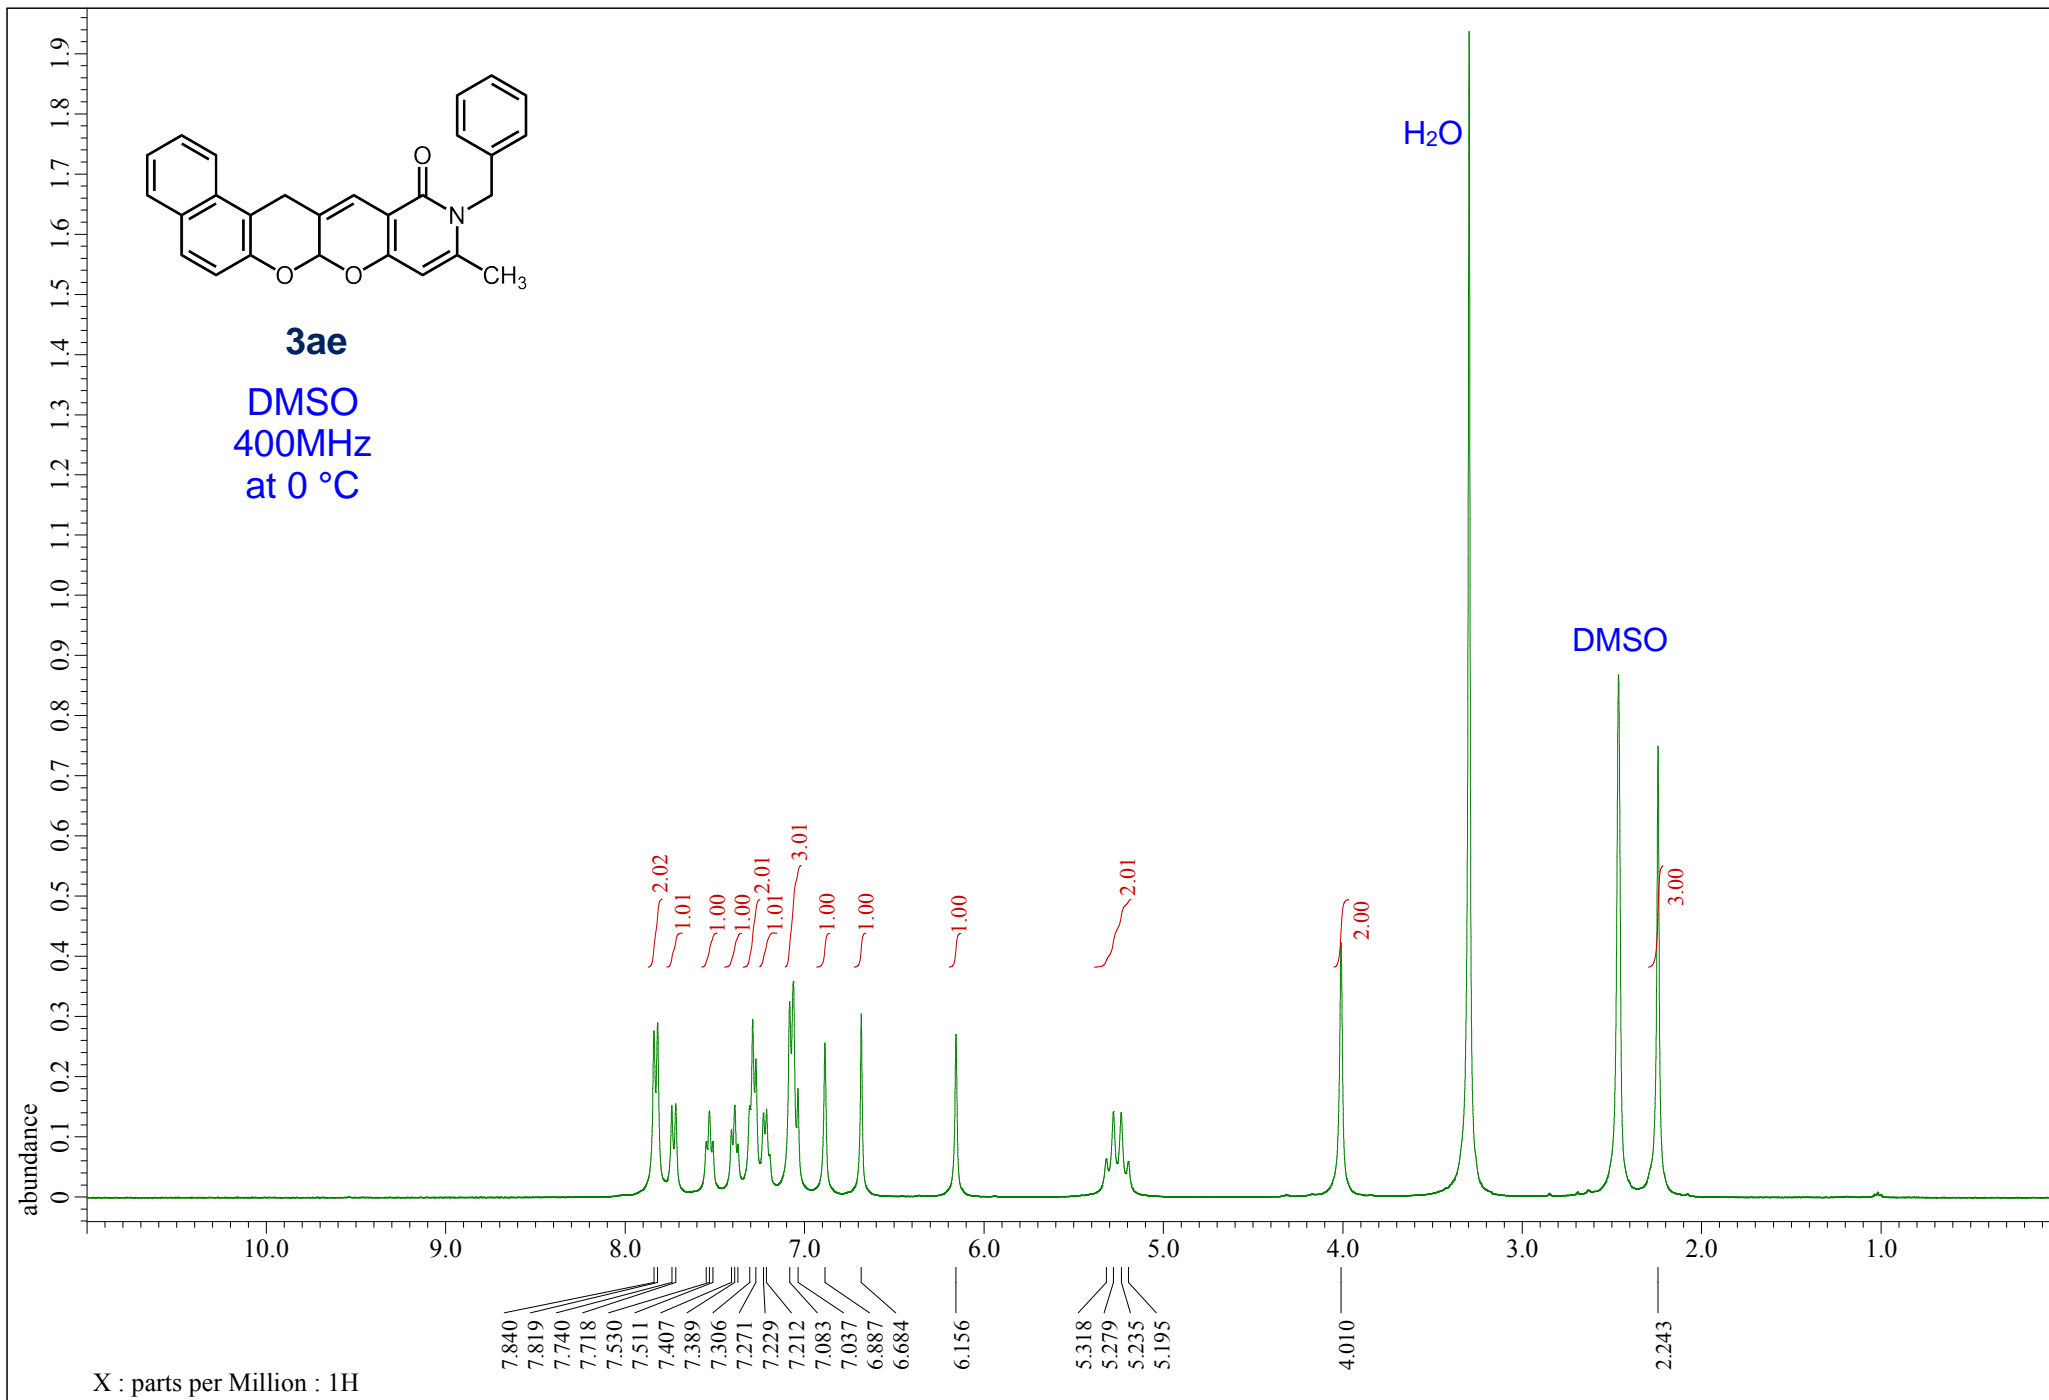

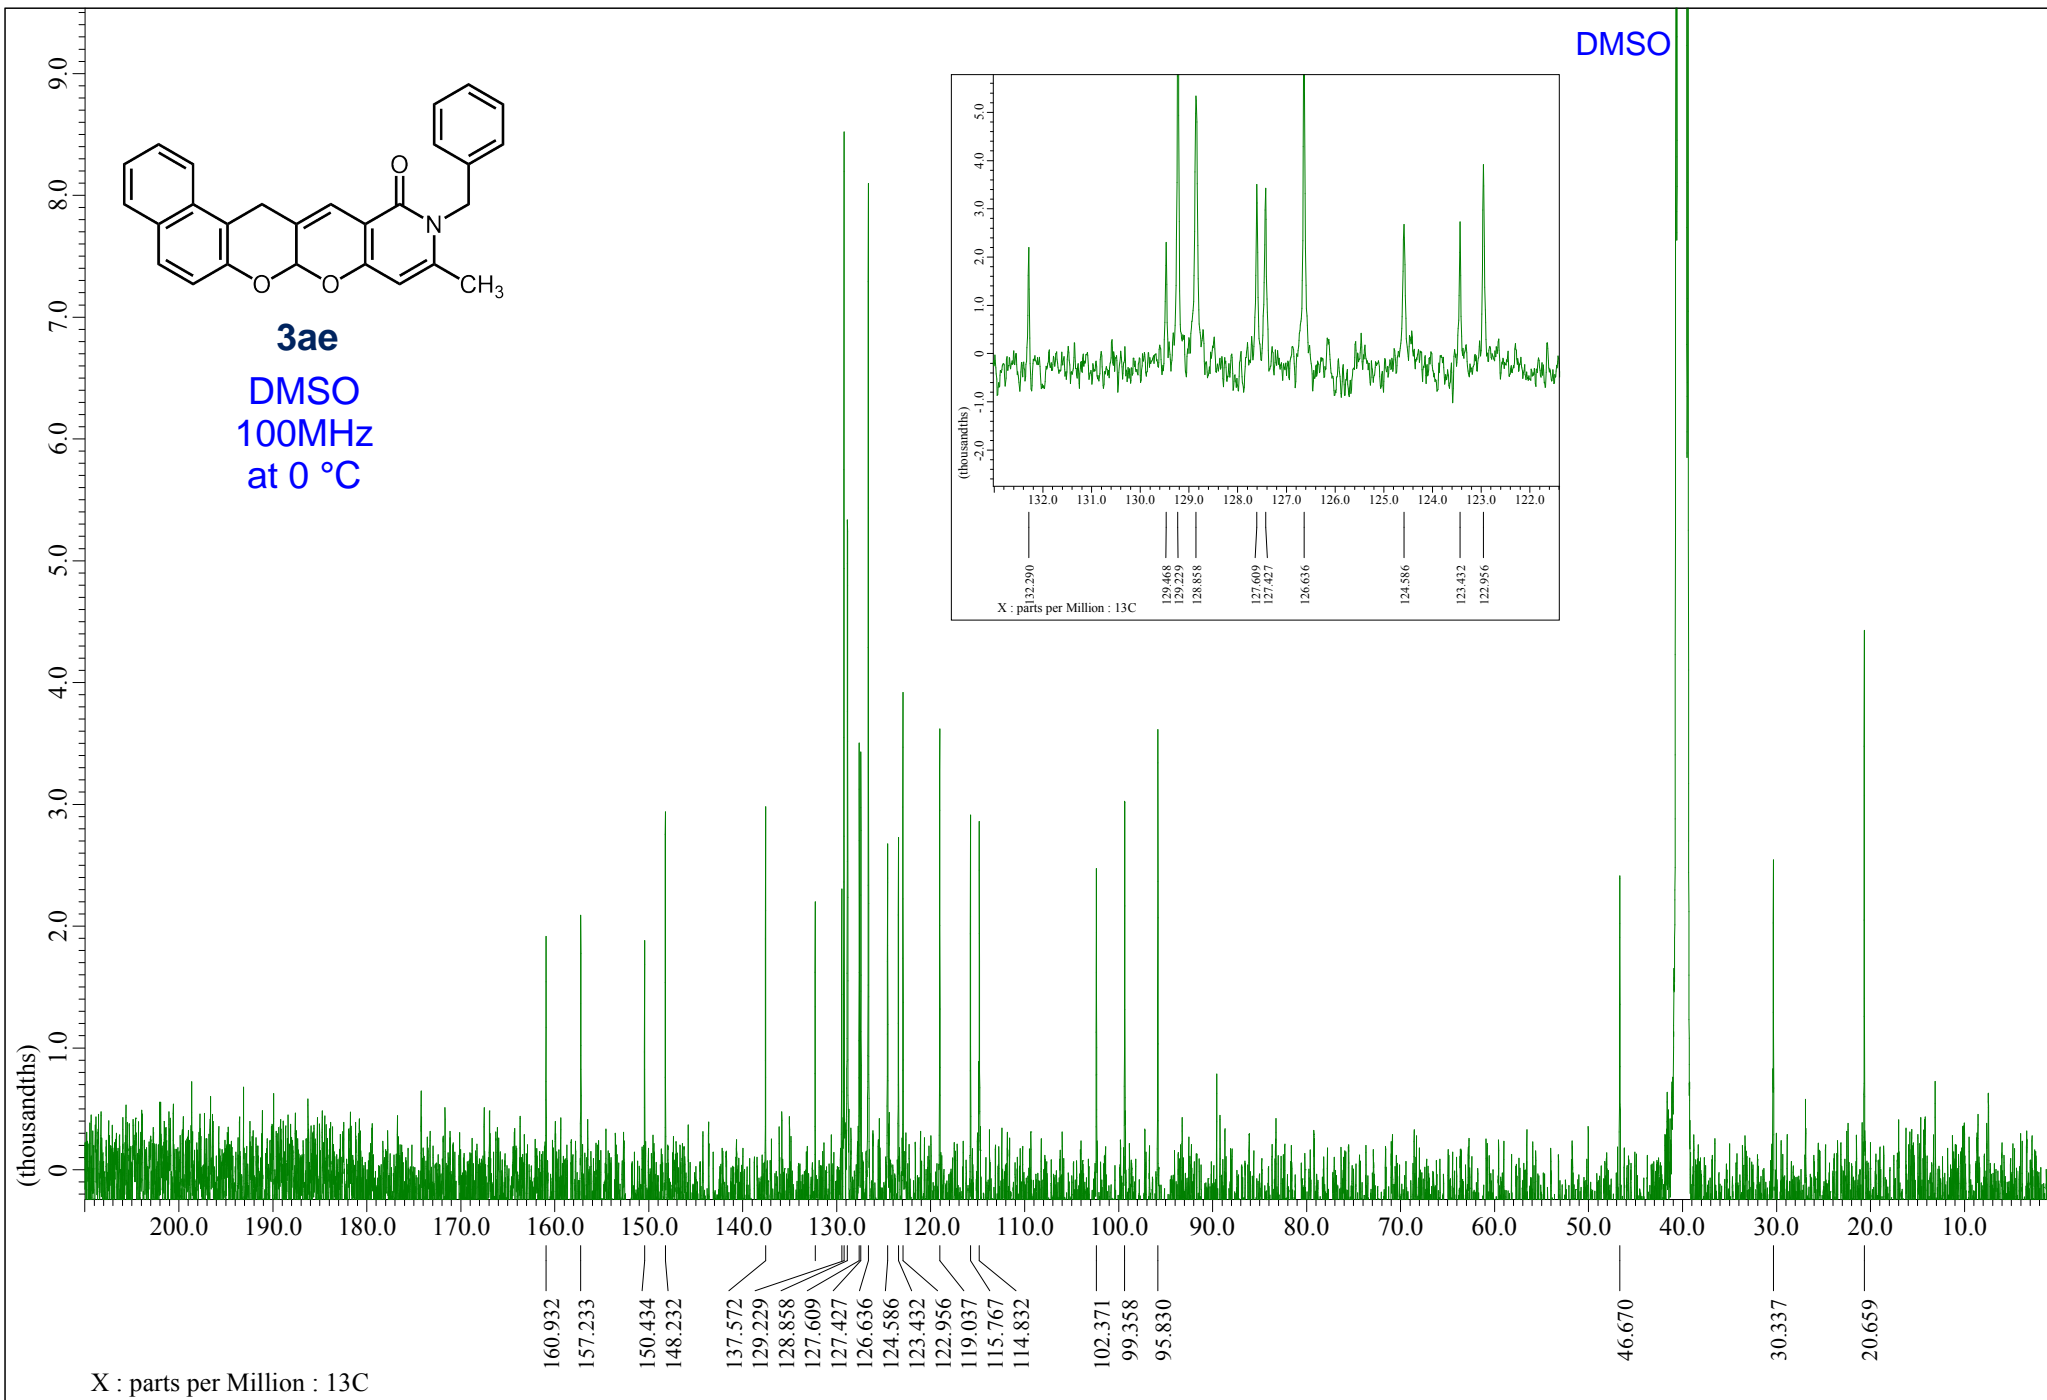

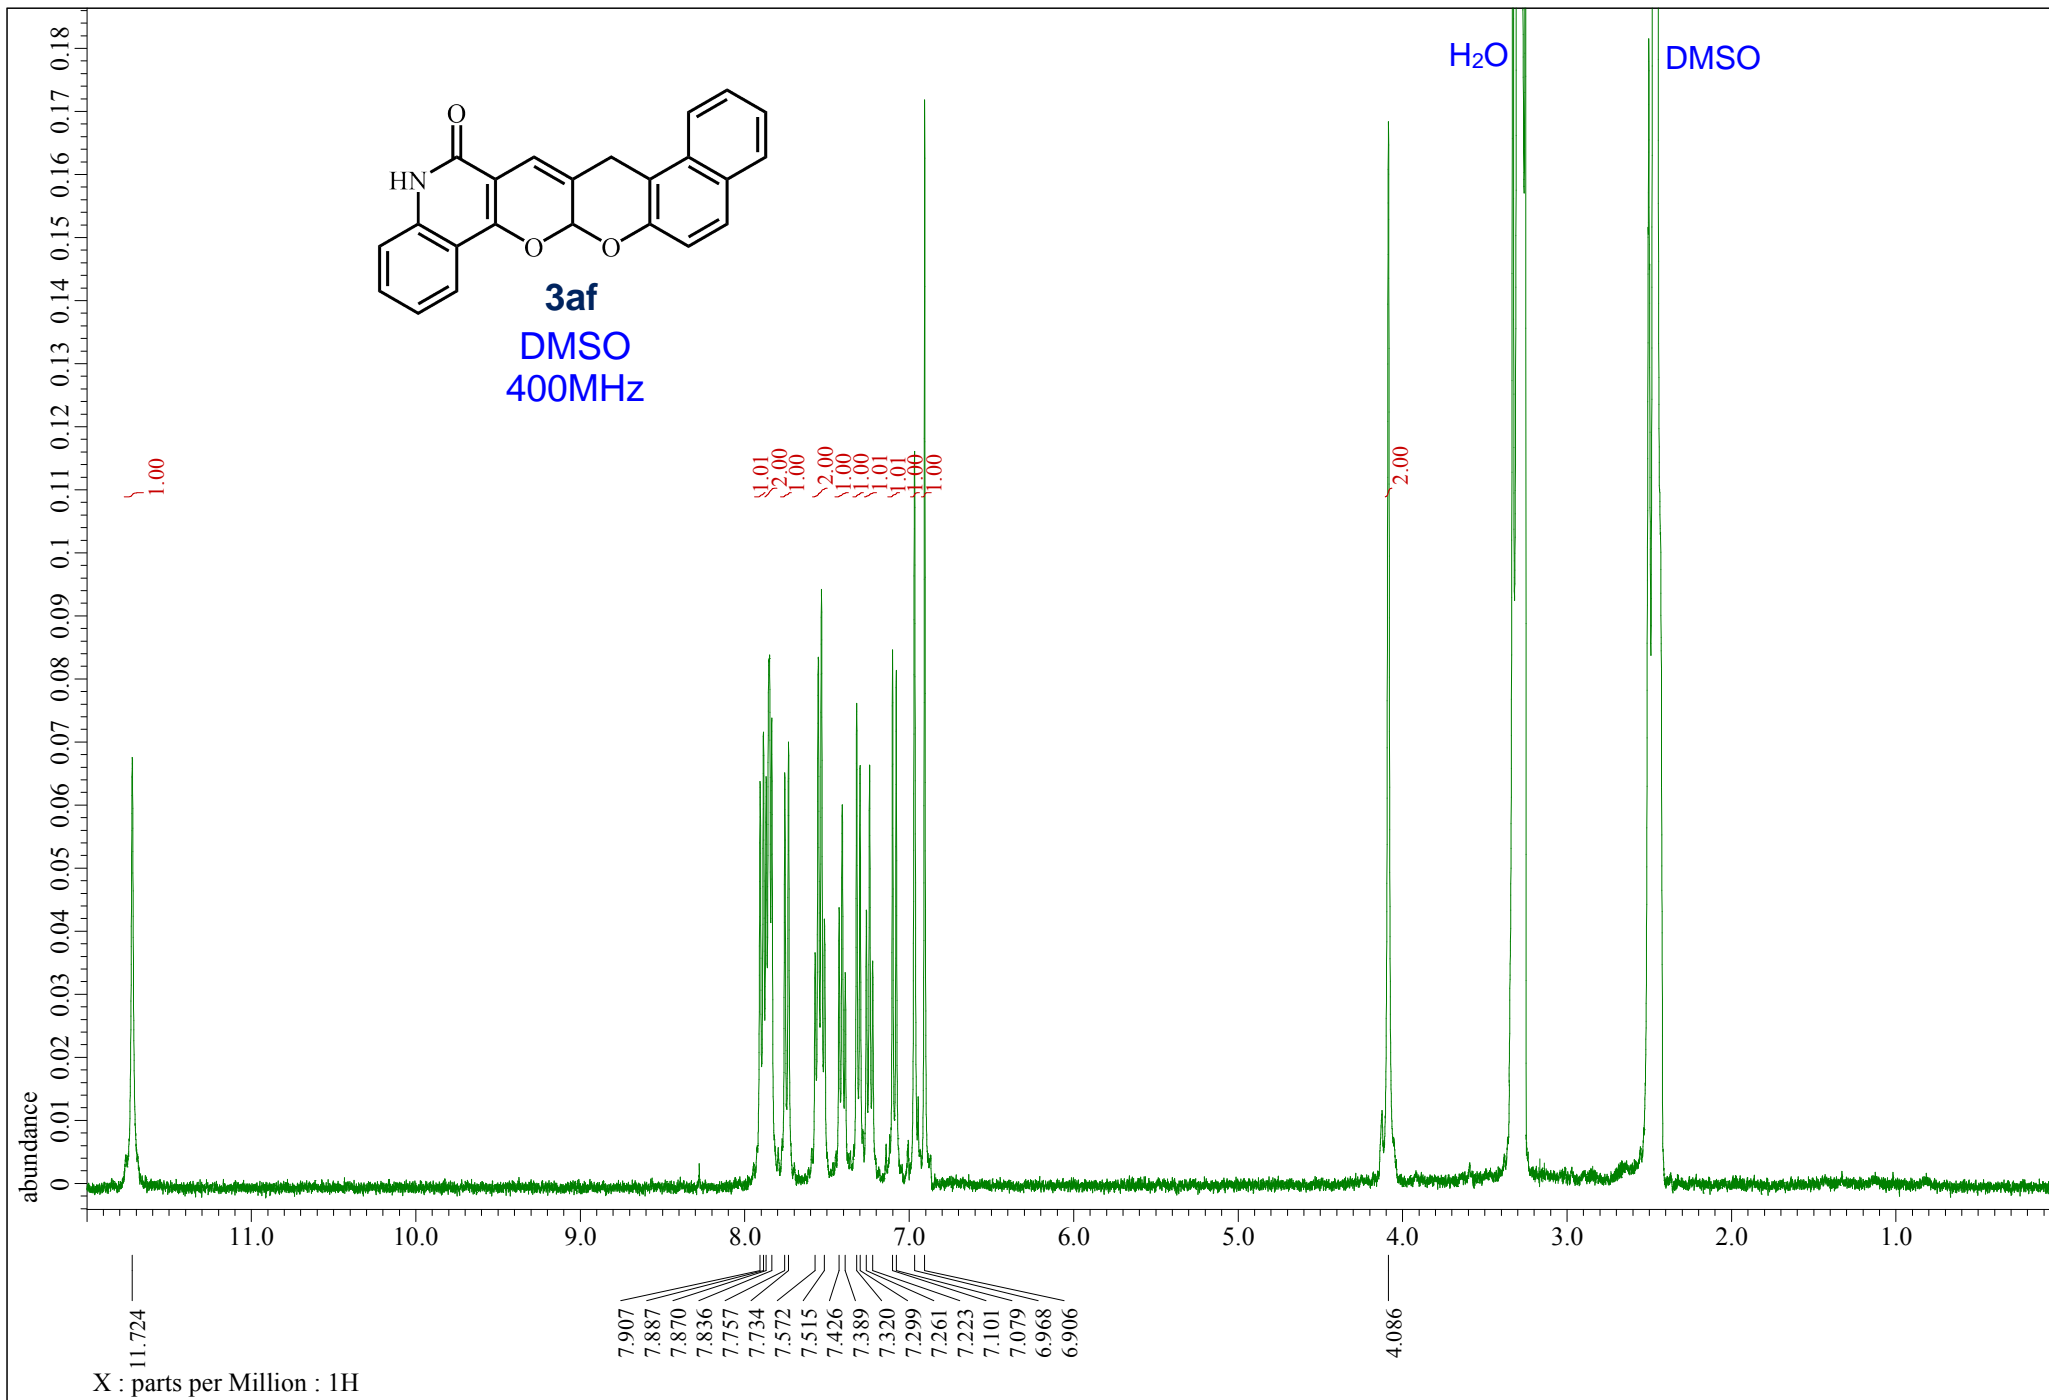



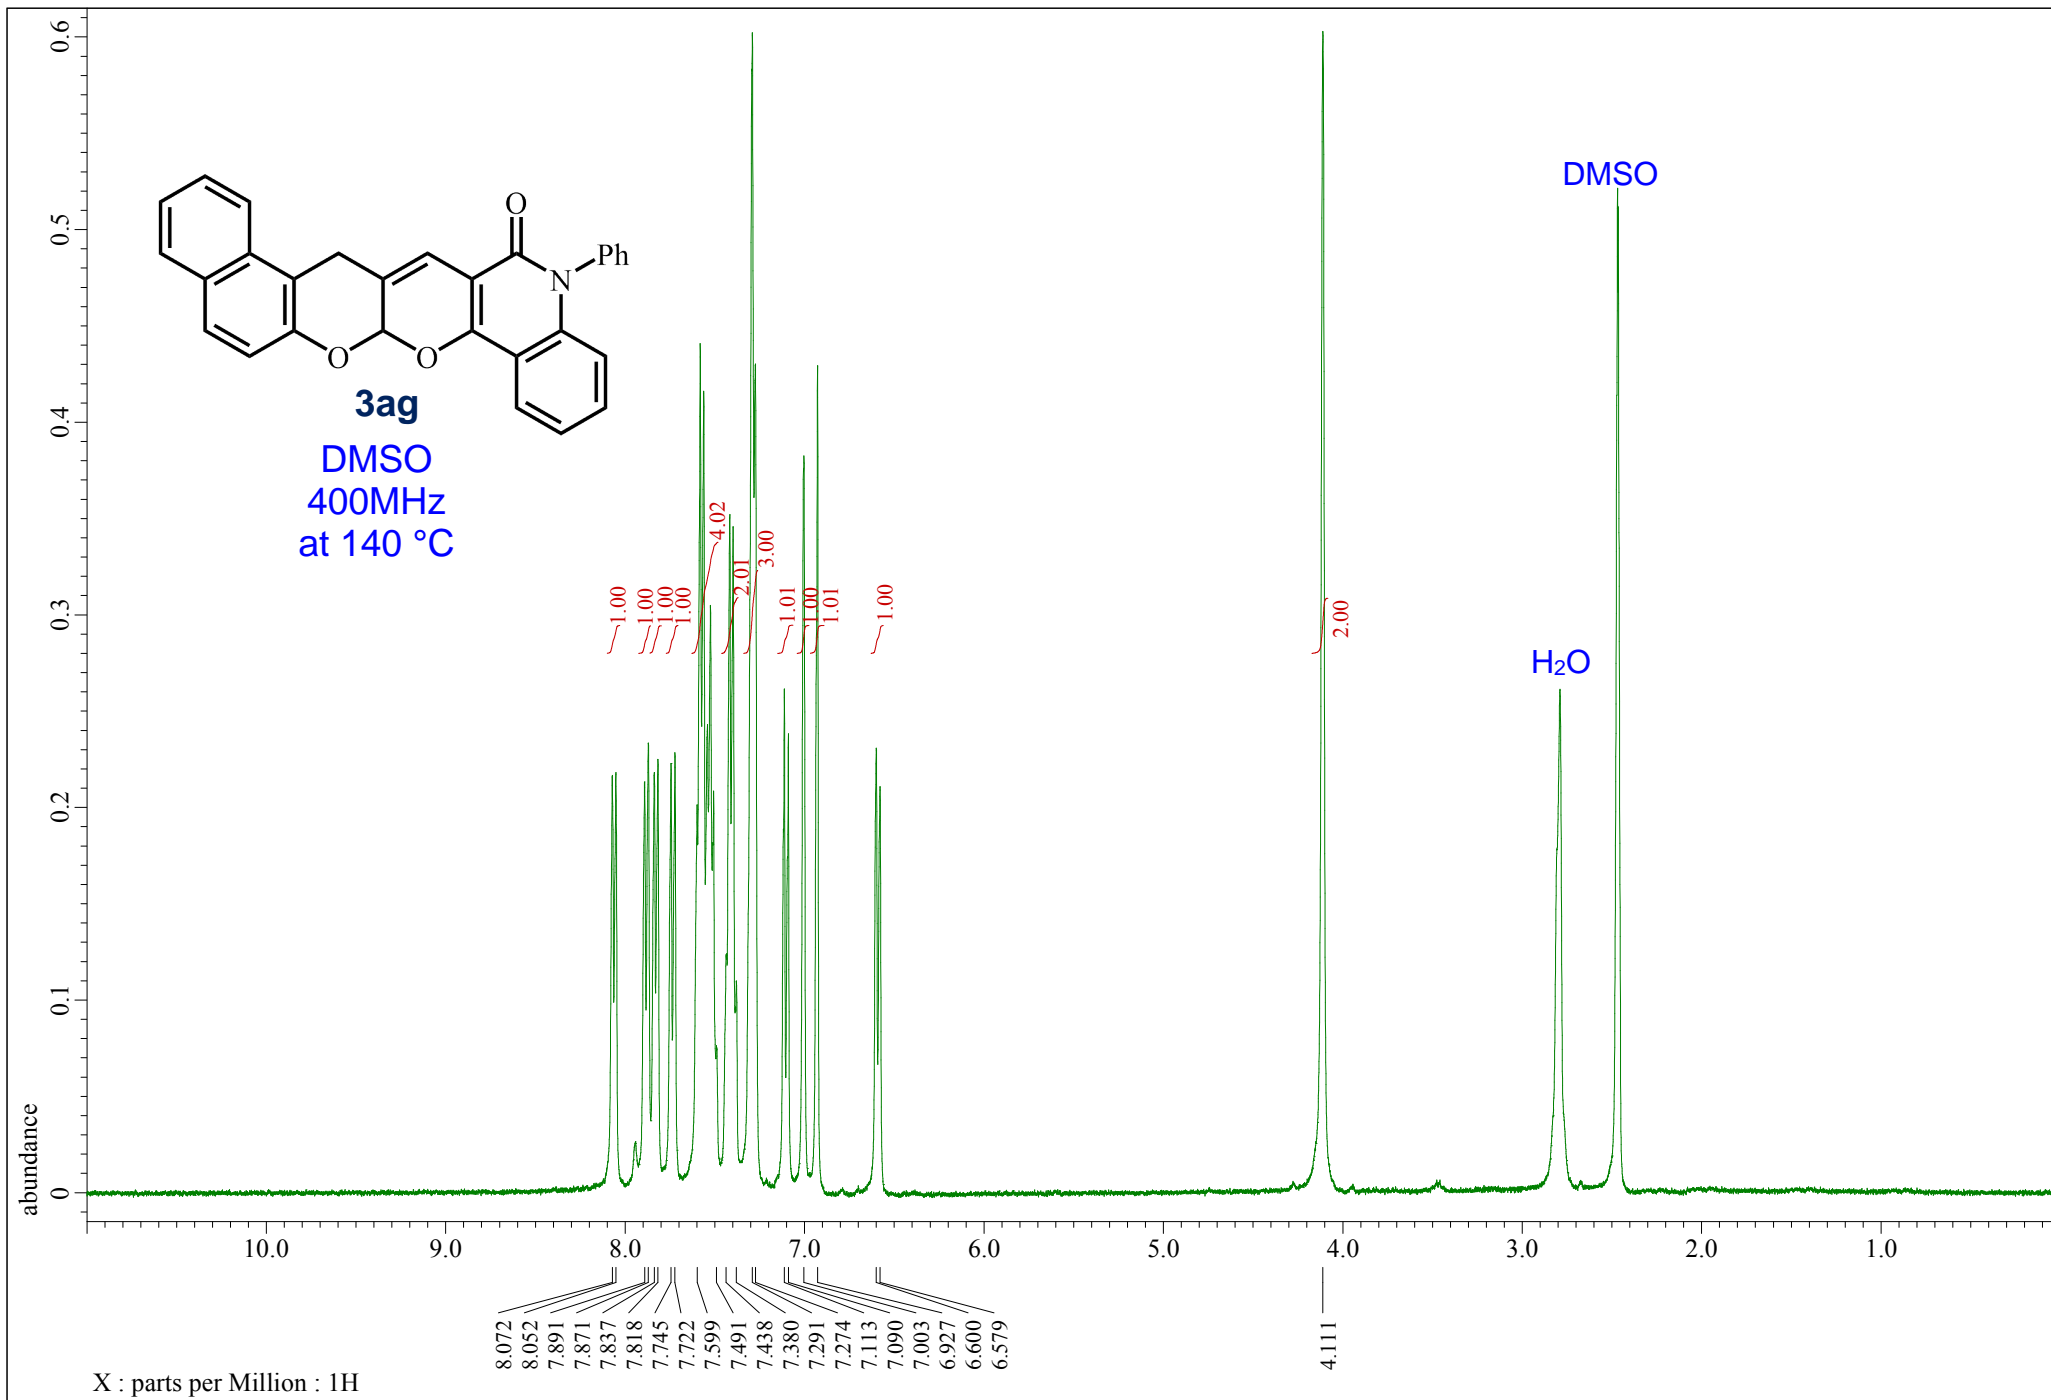

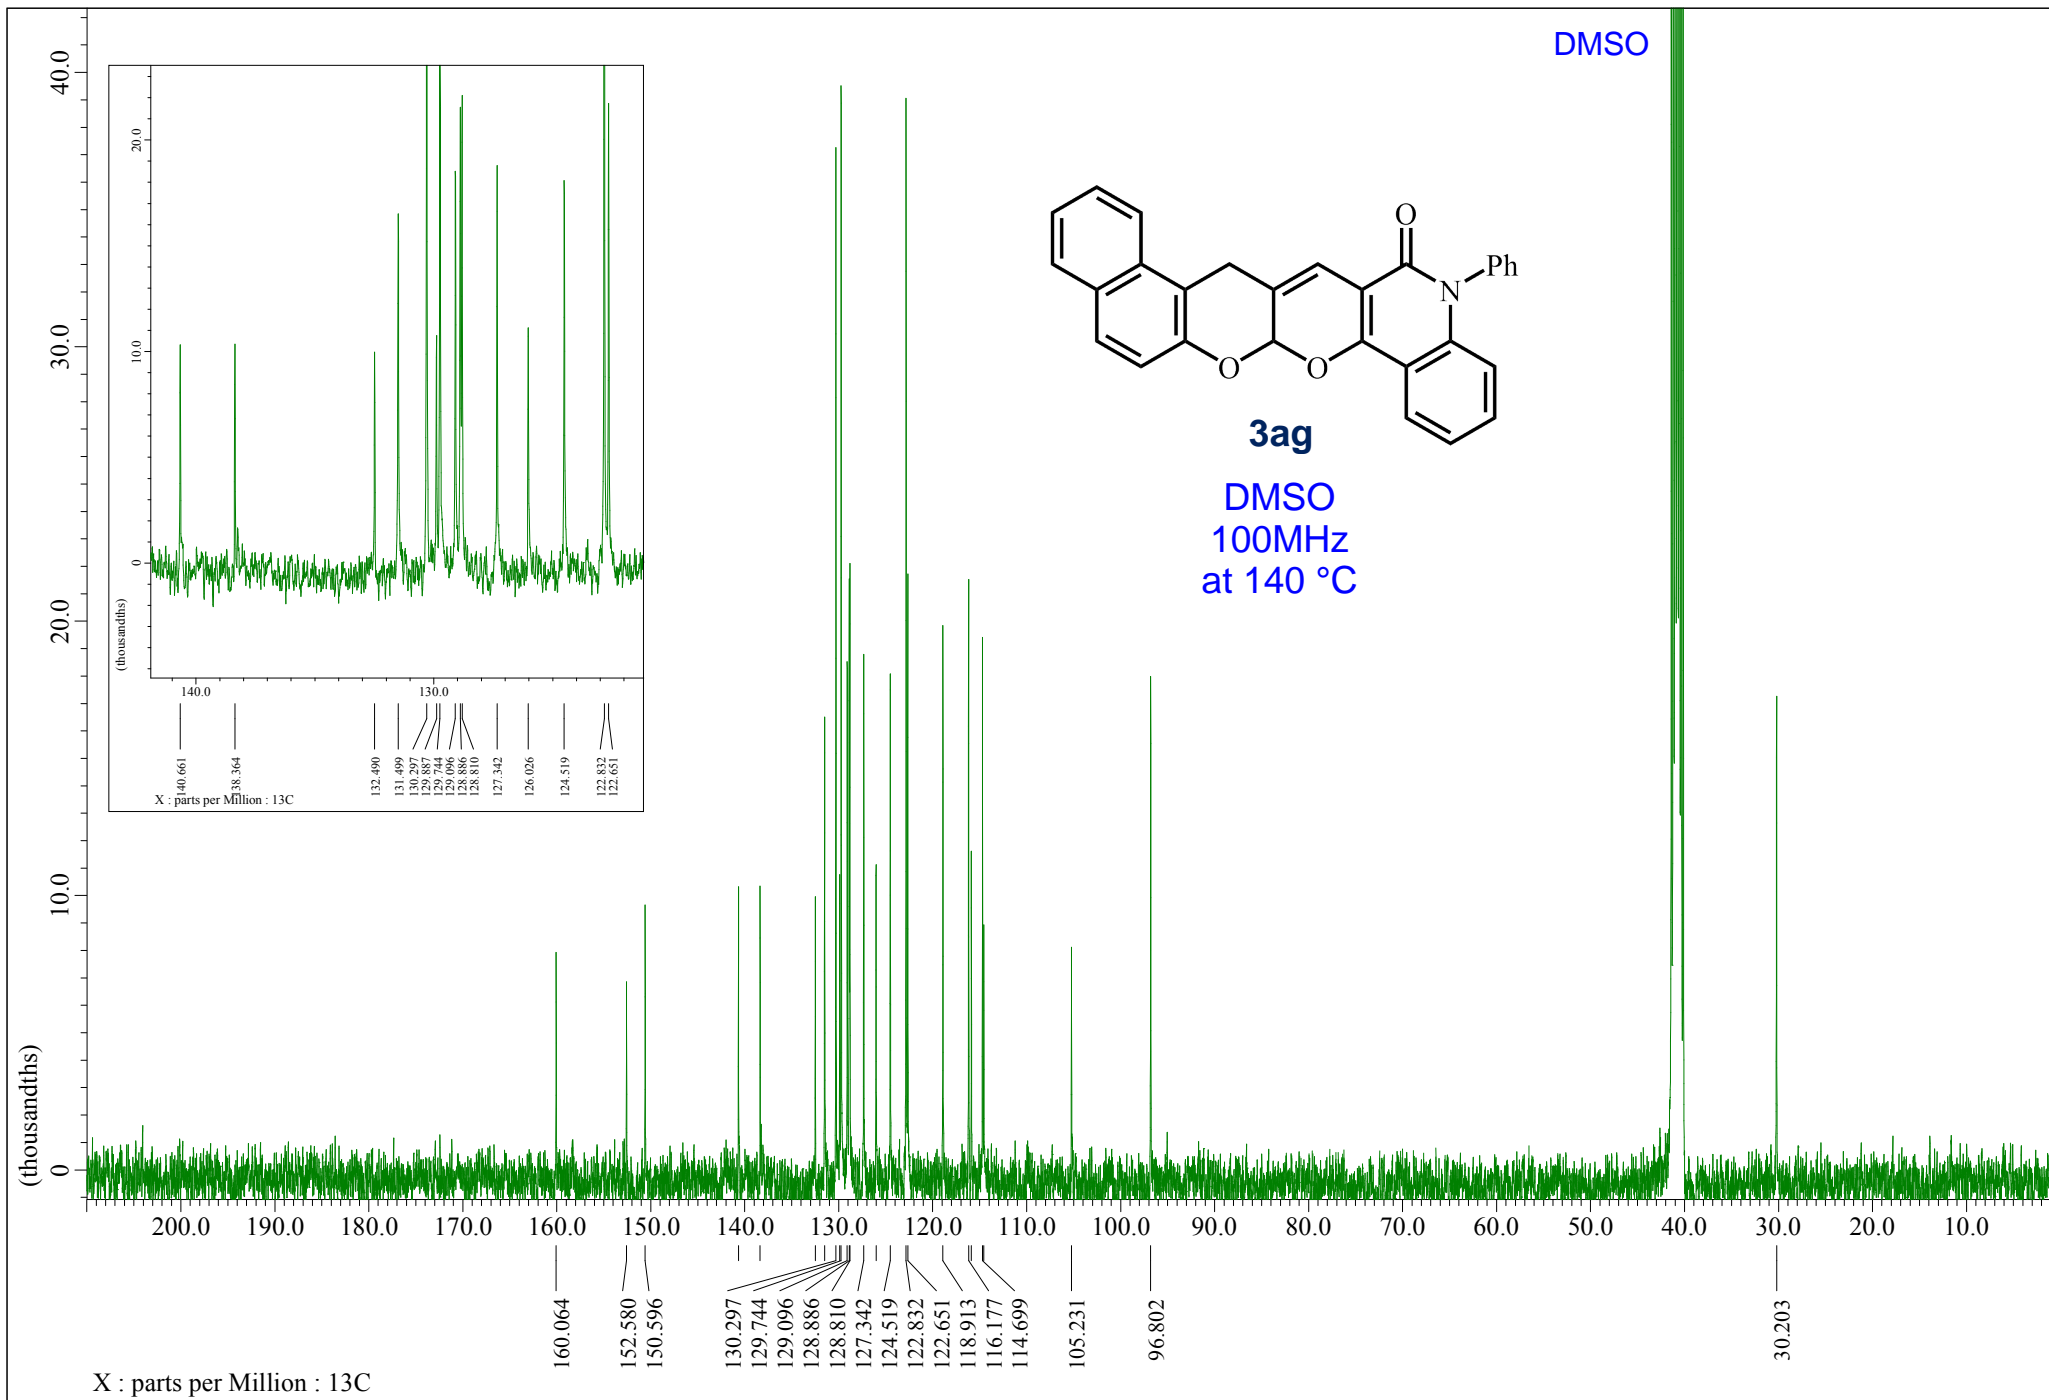

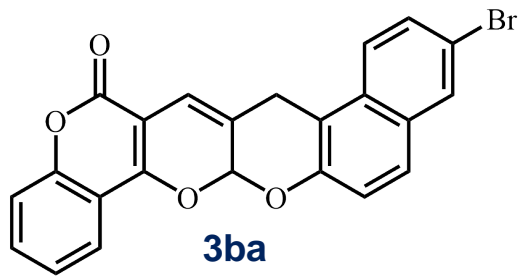

DMSO  
400MHz  
at 110 °C

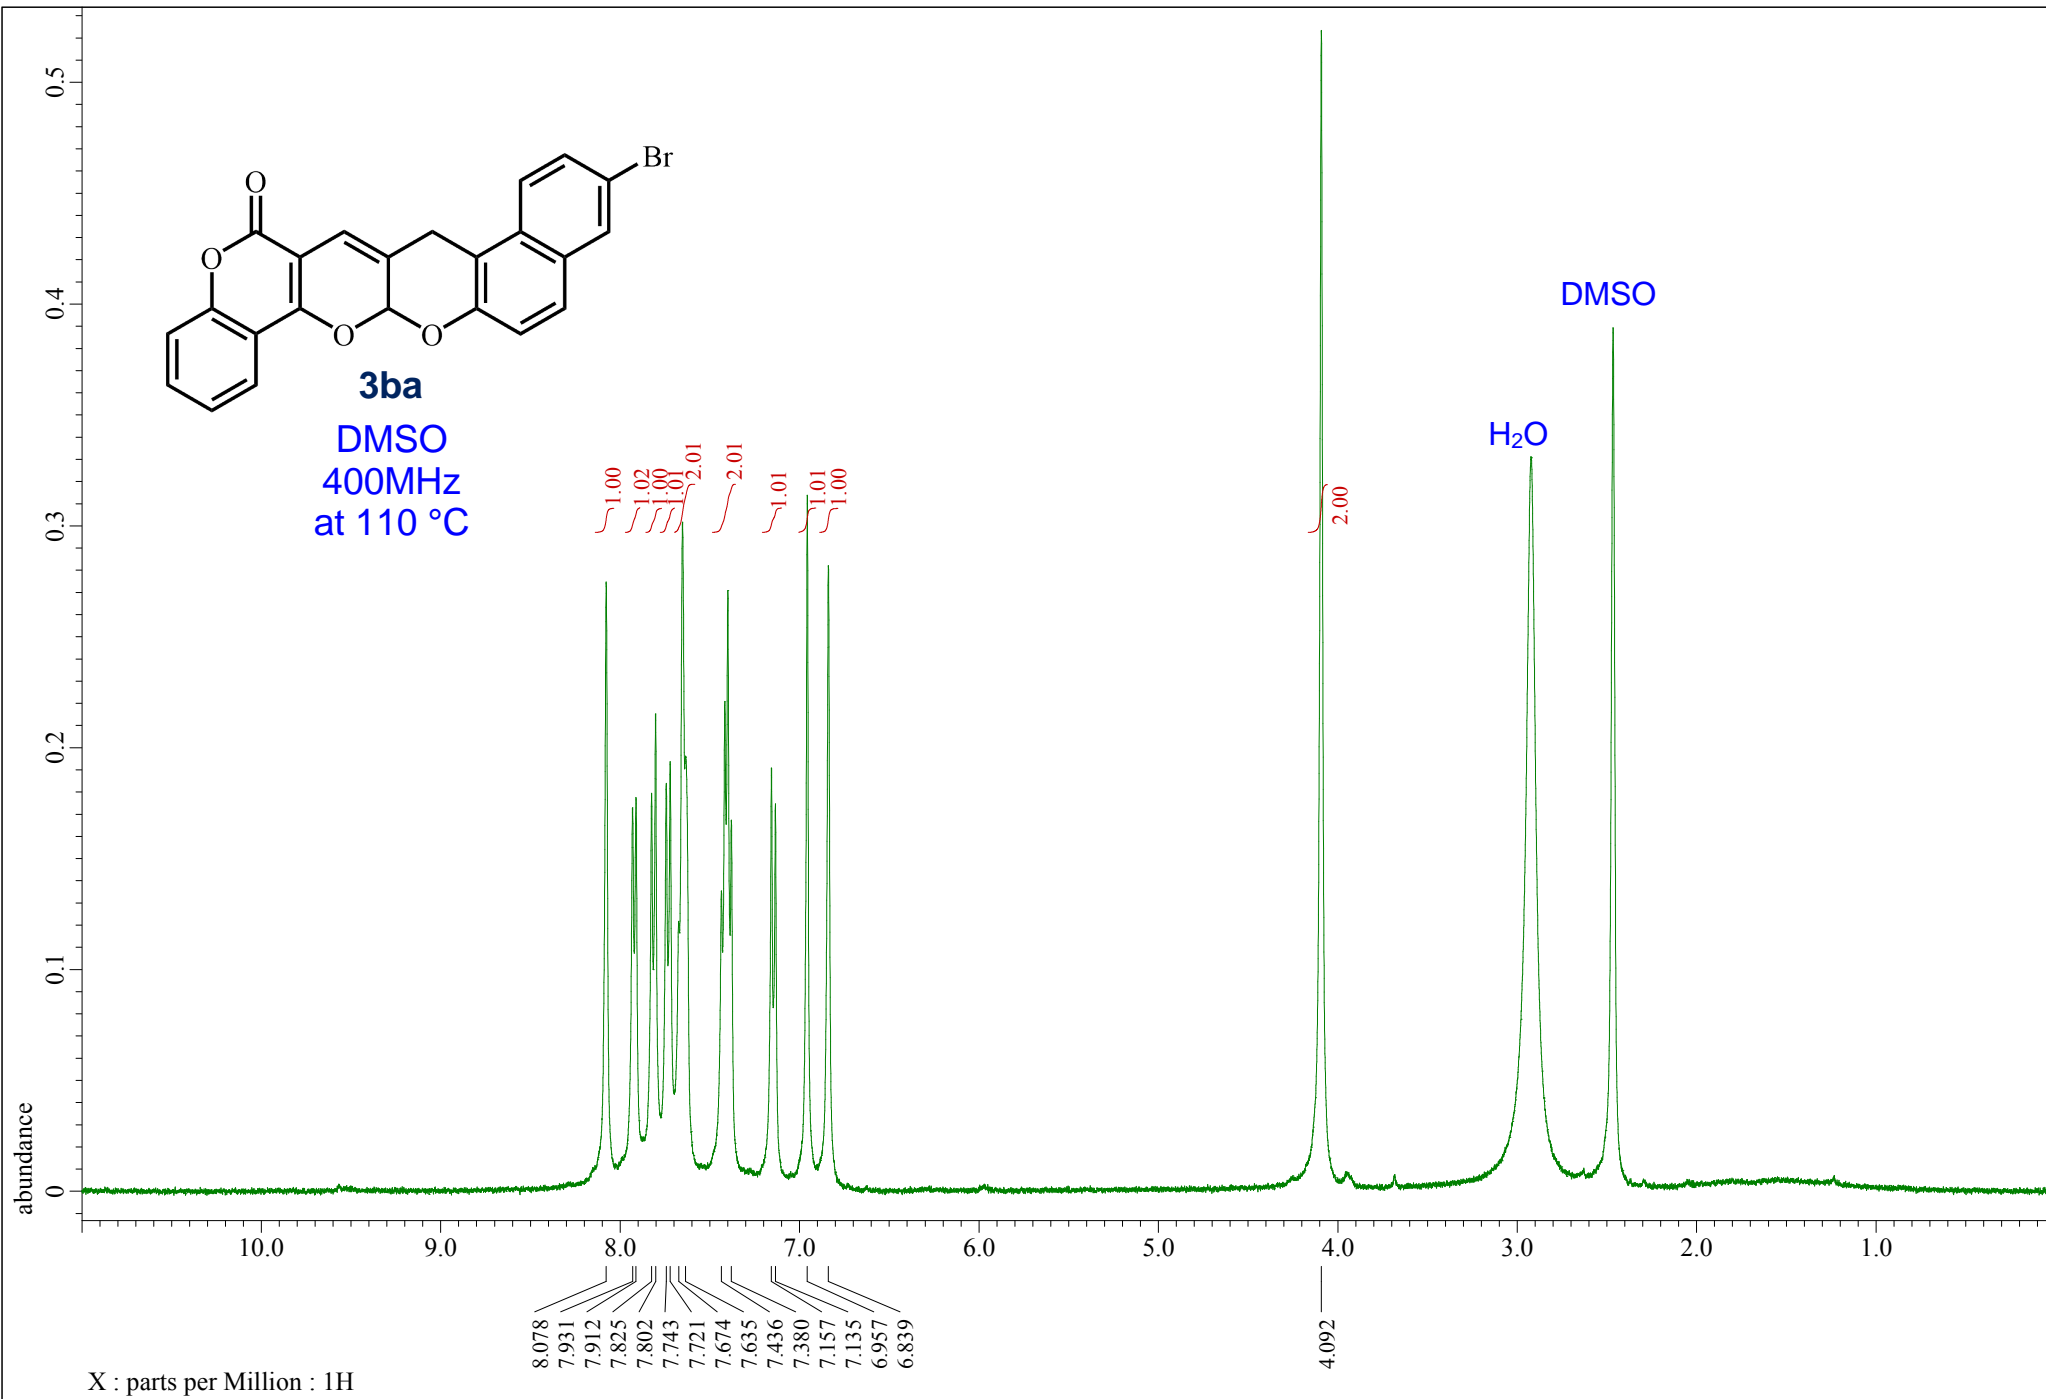

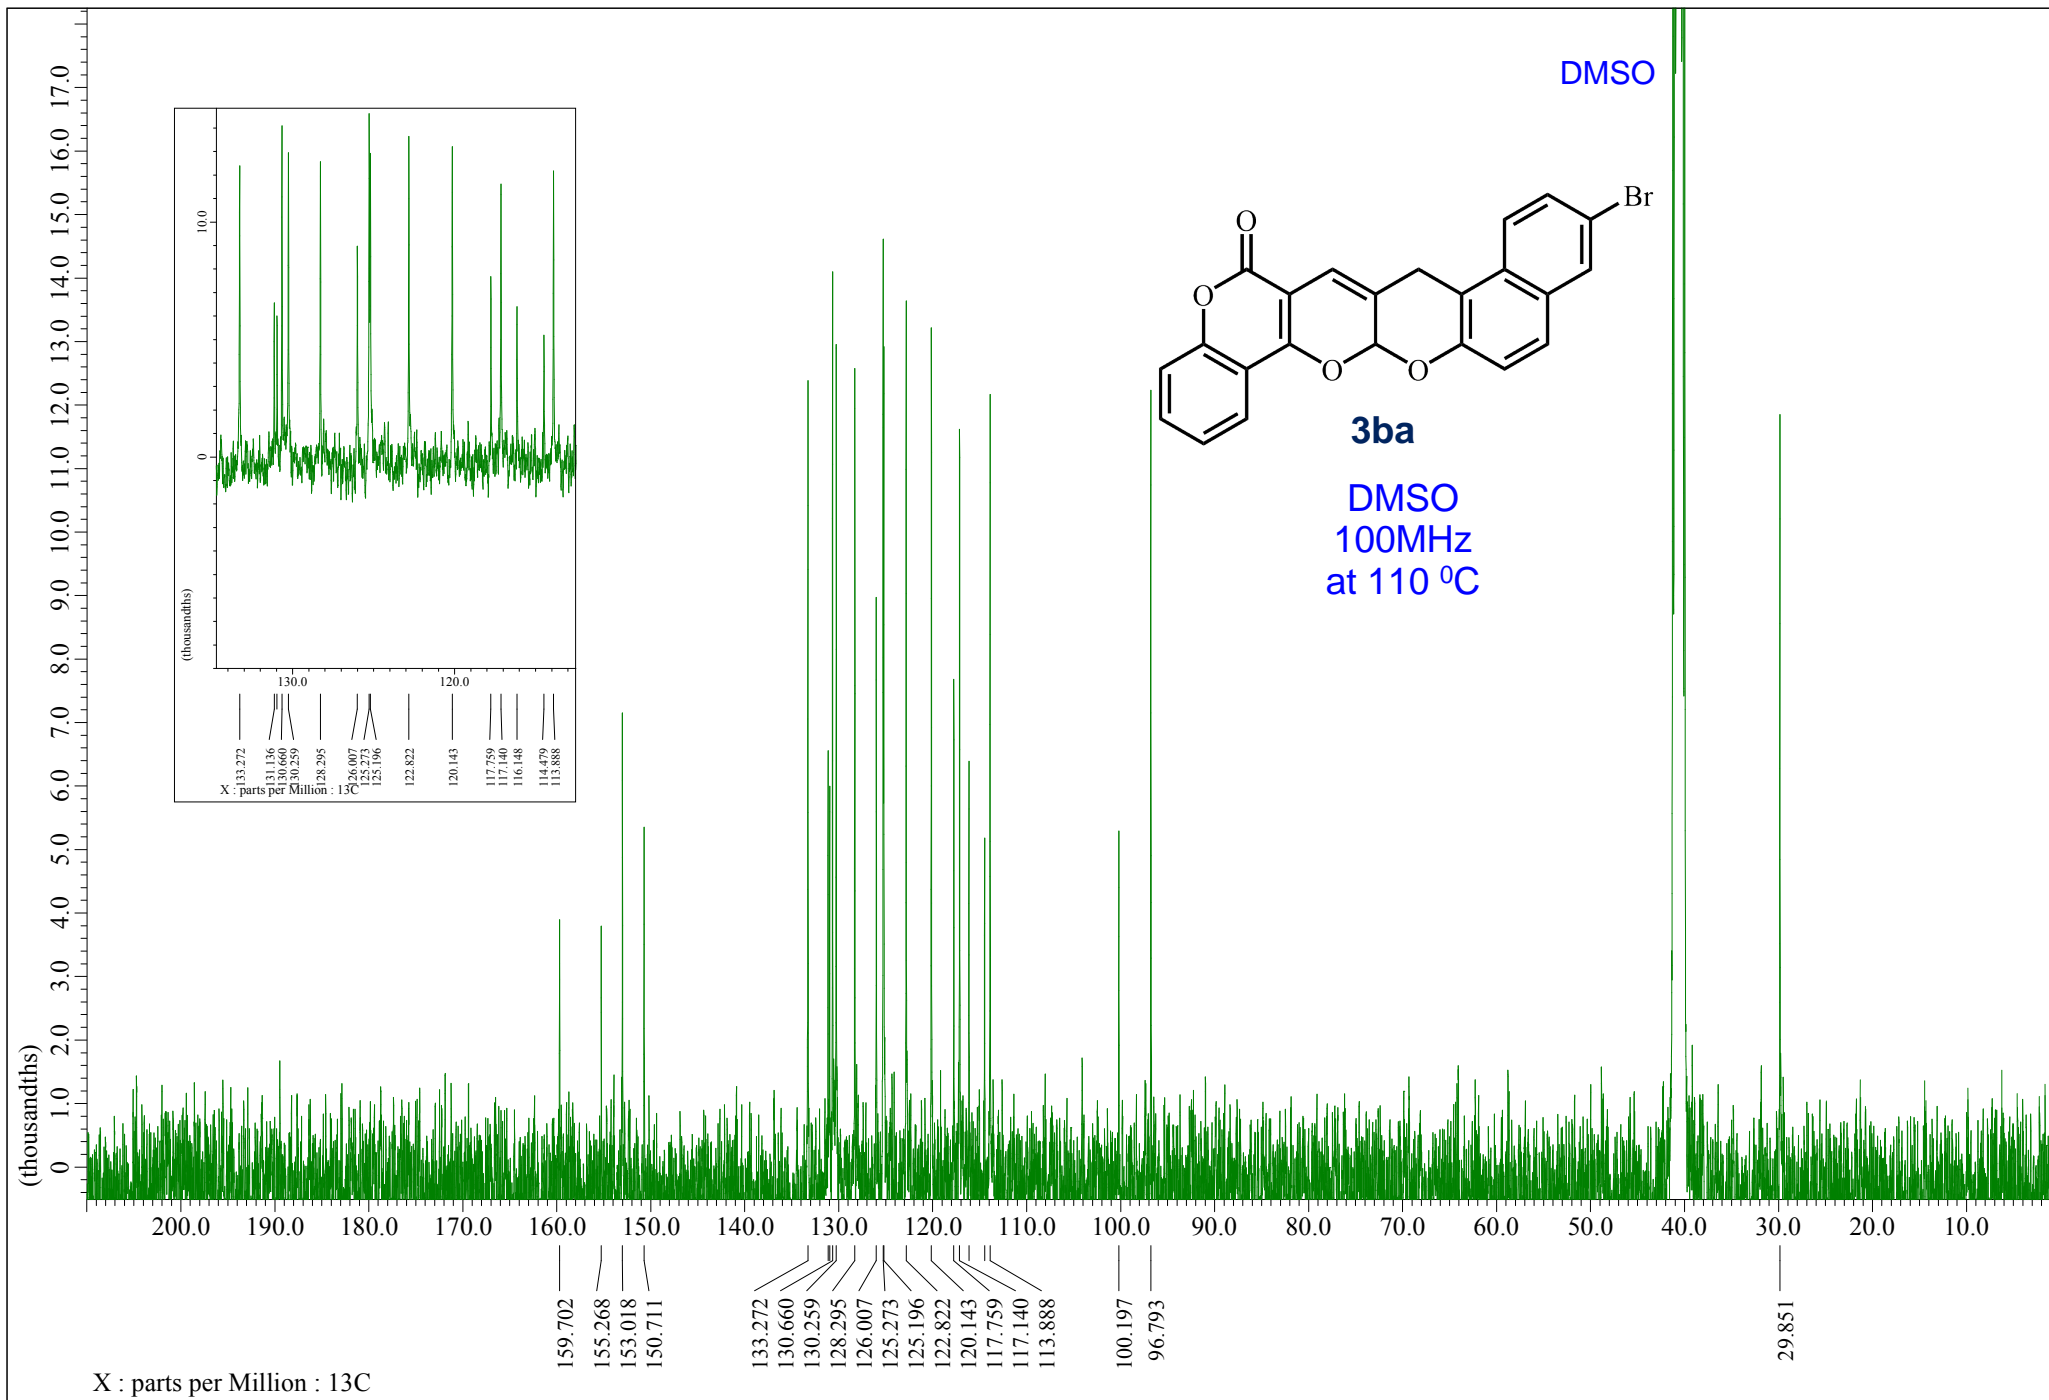

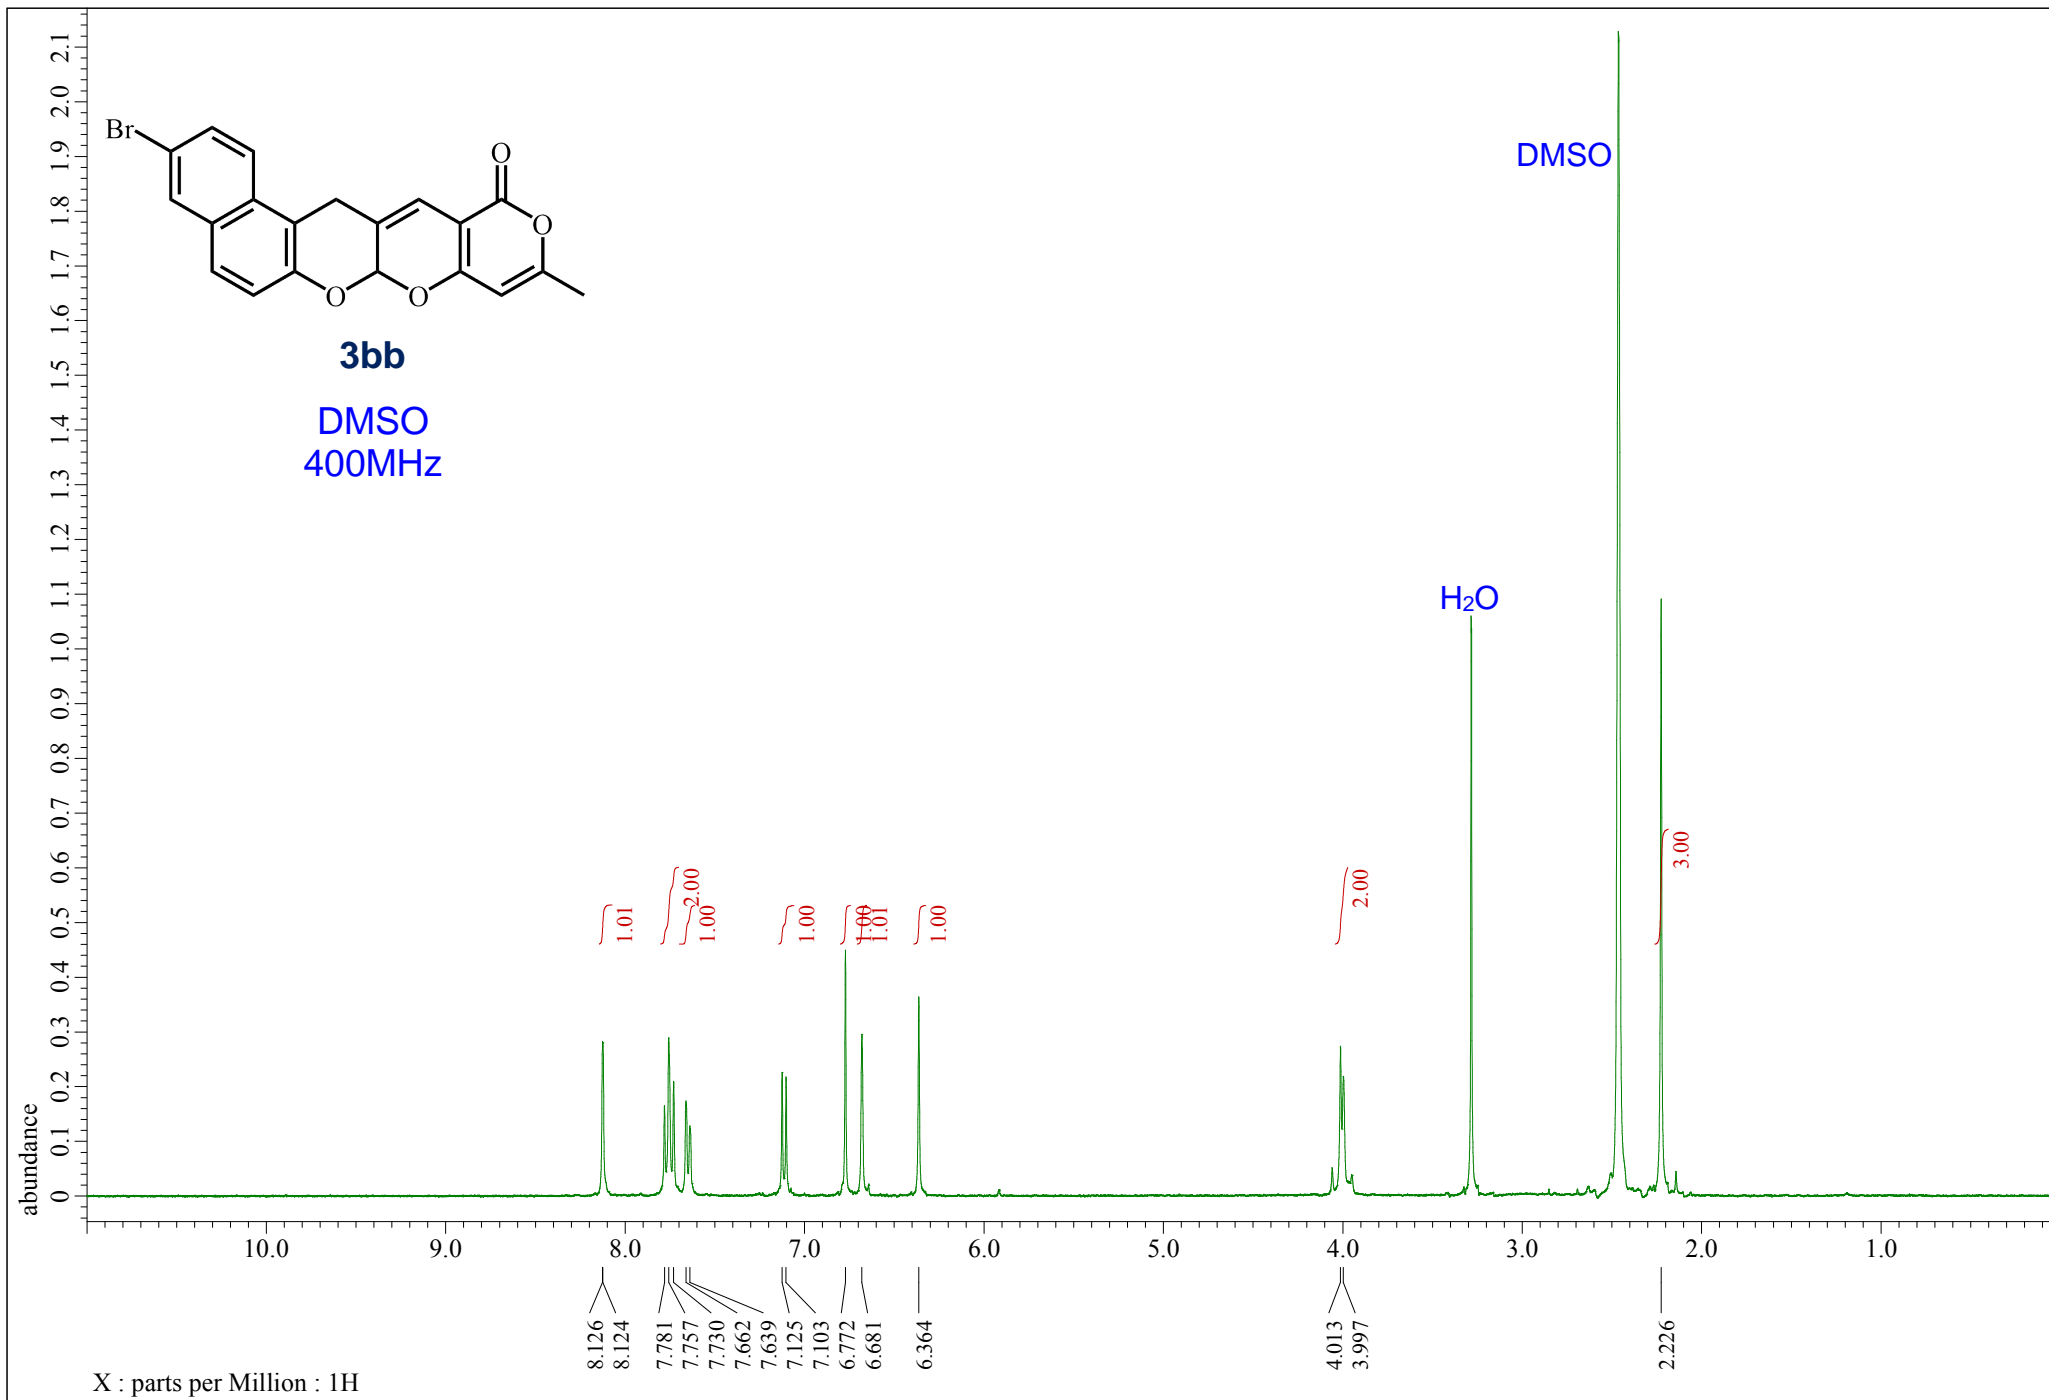

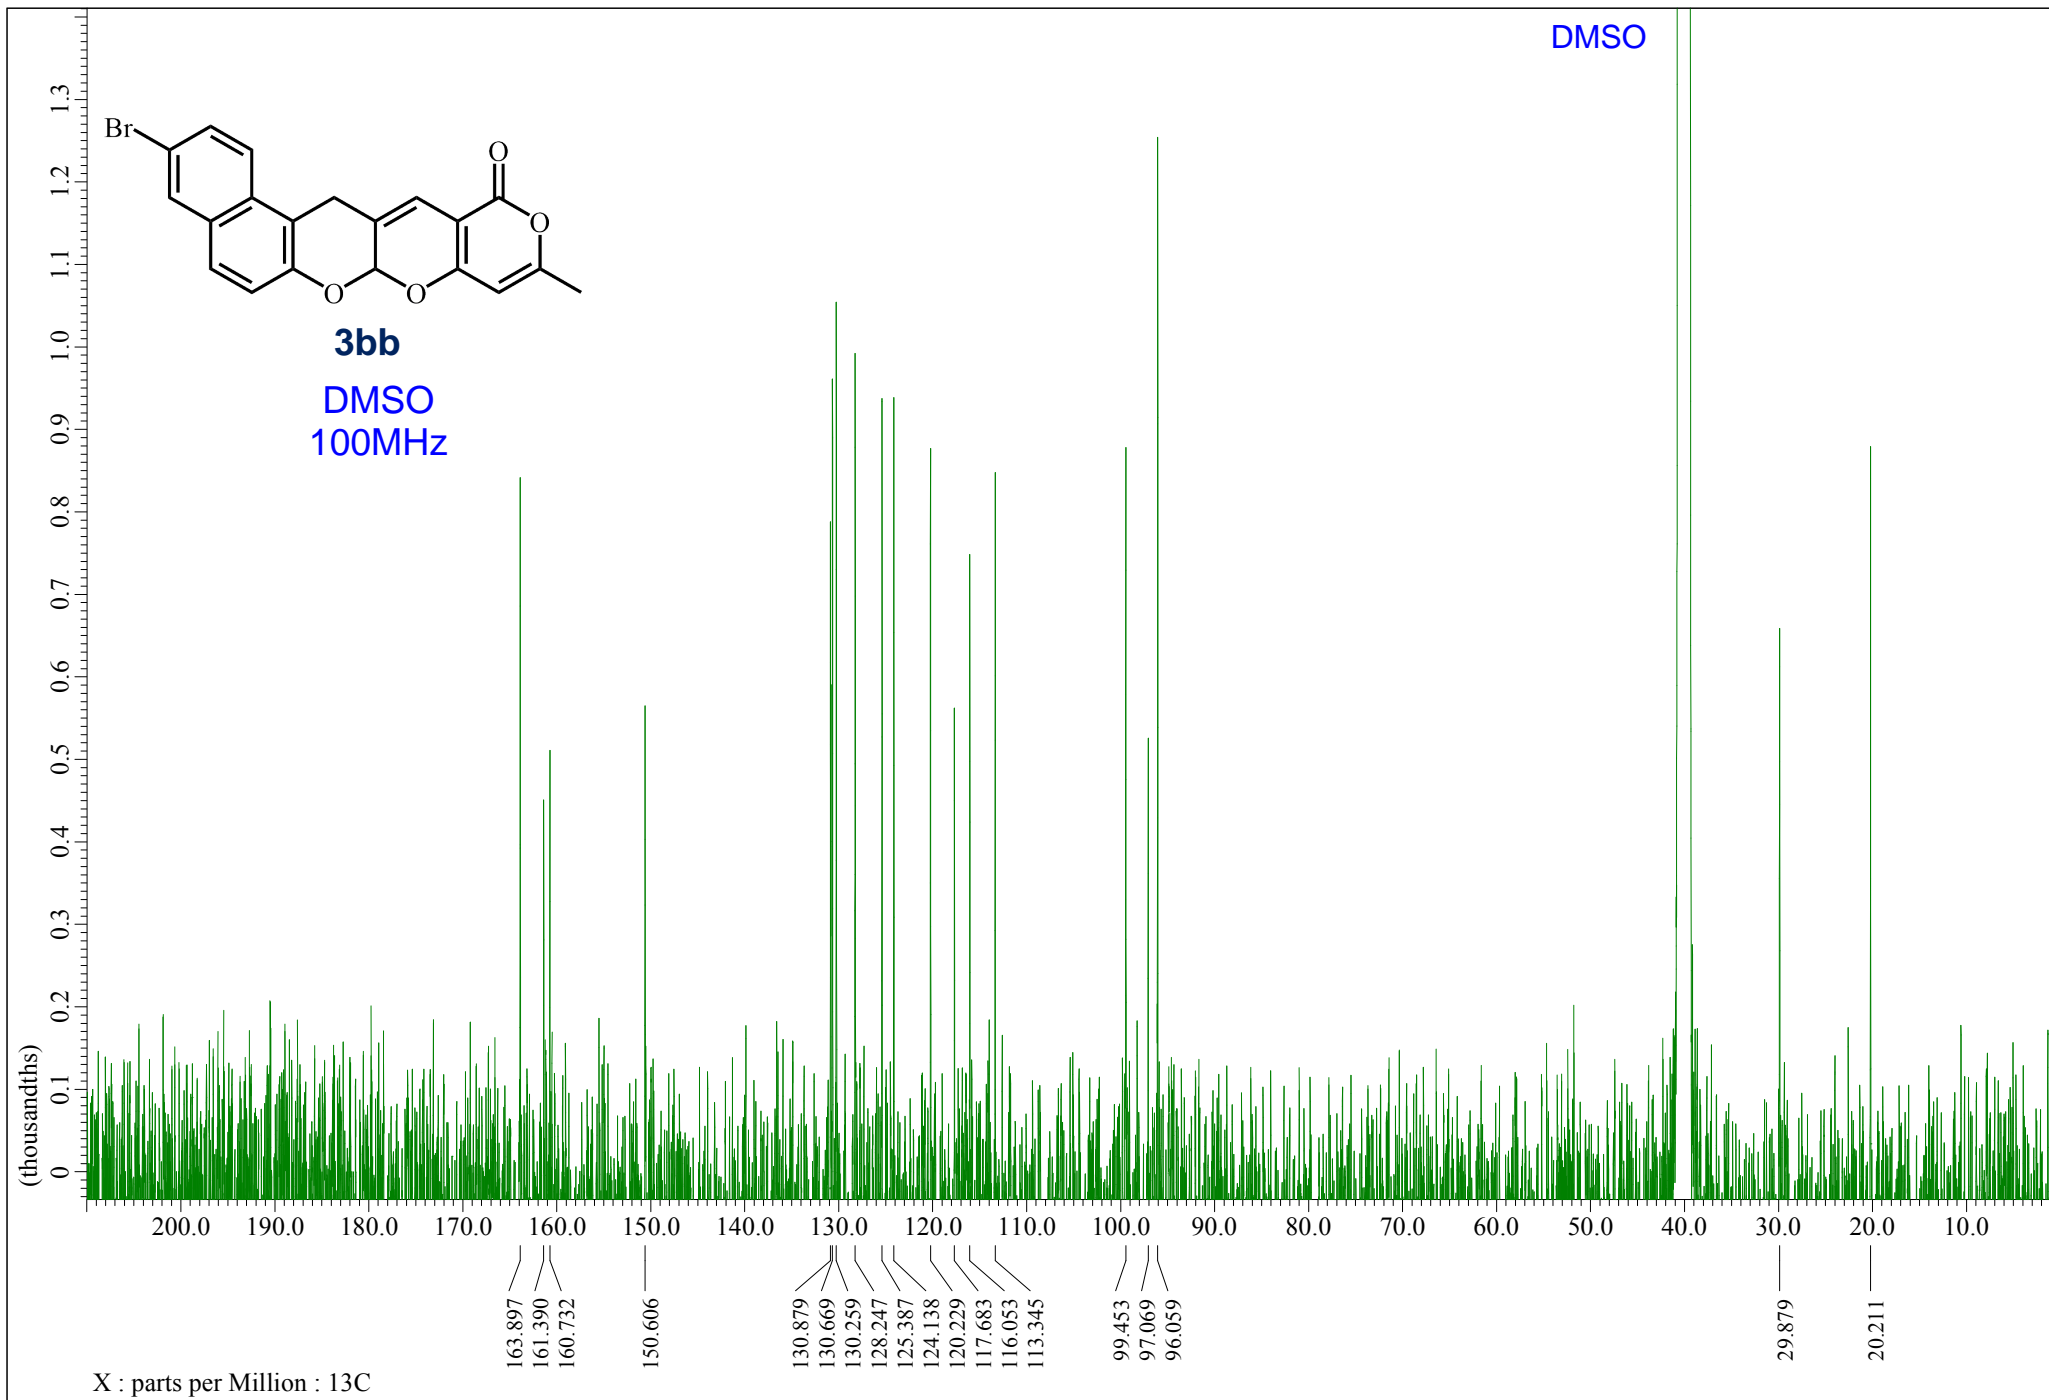

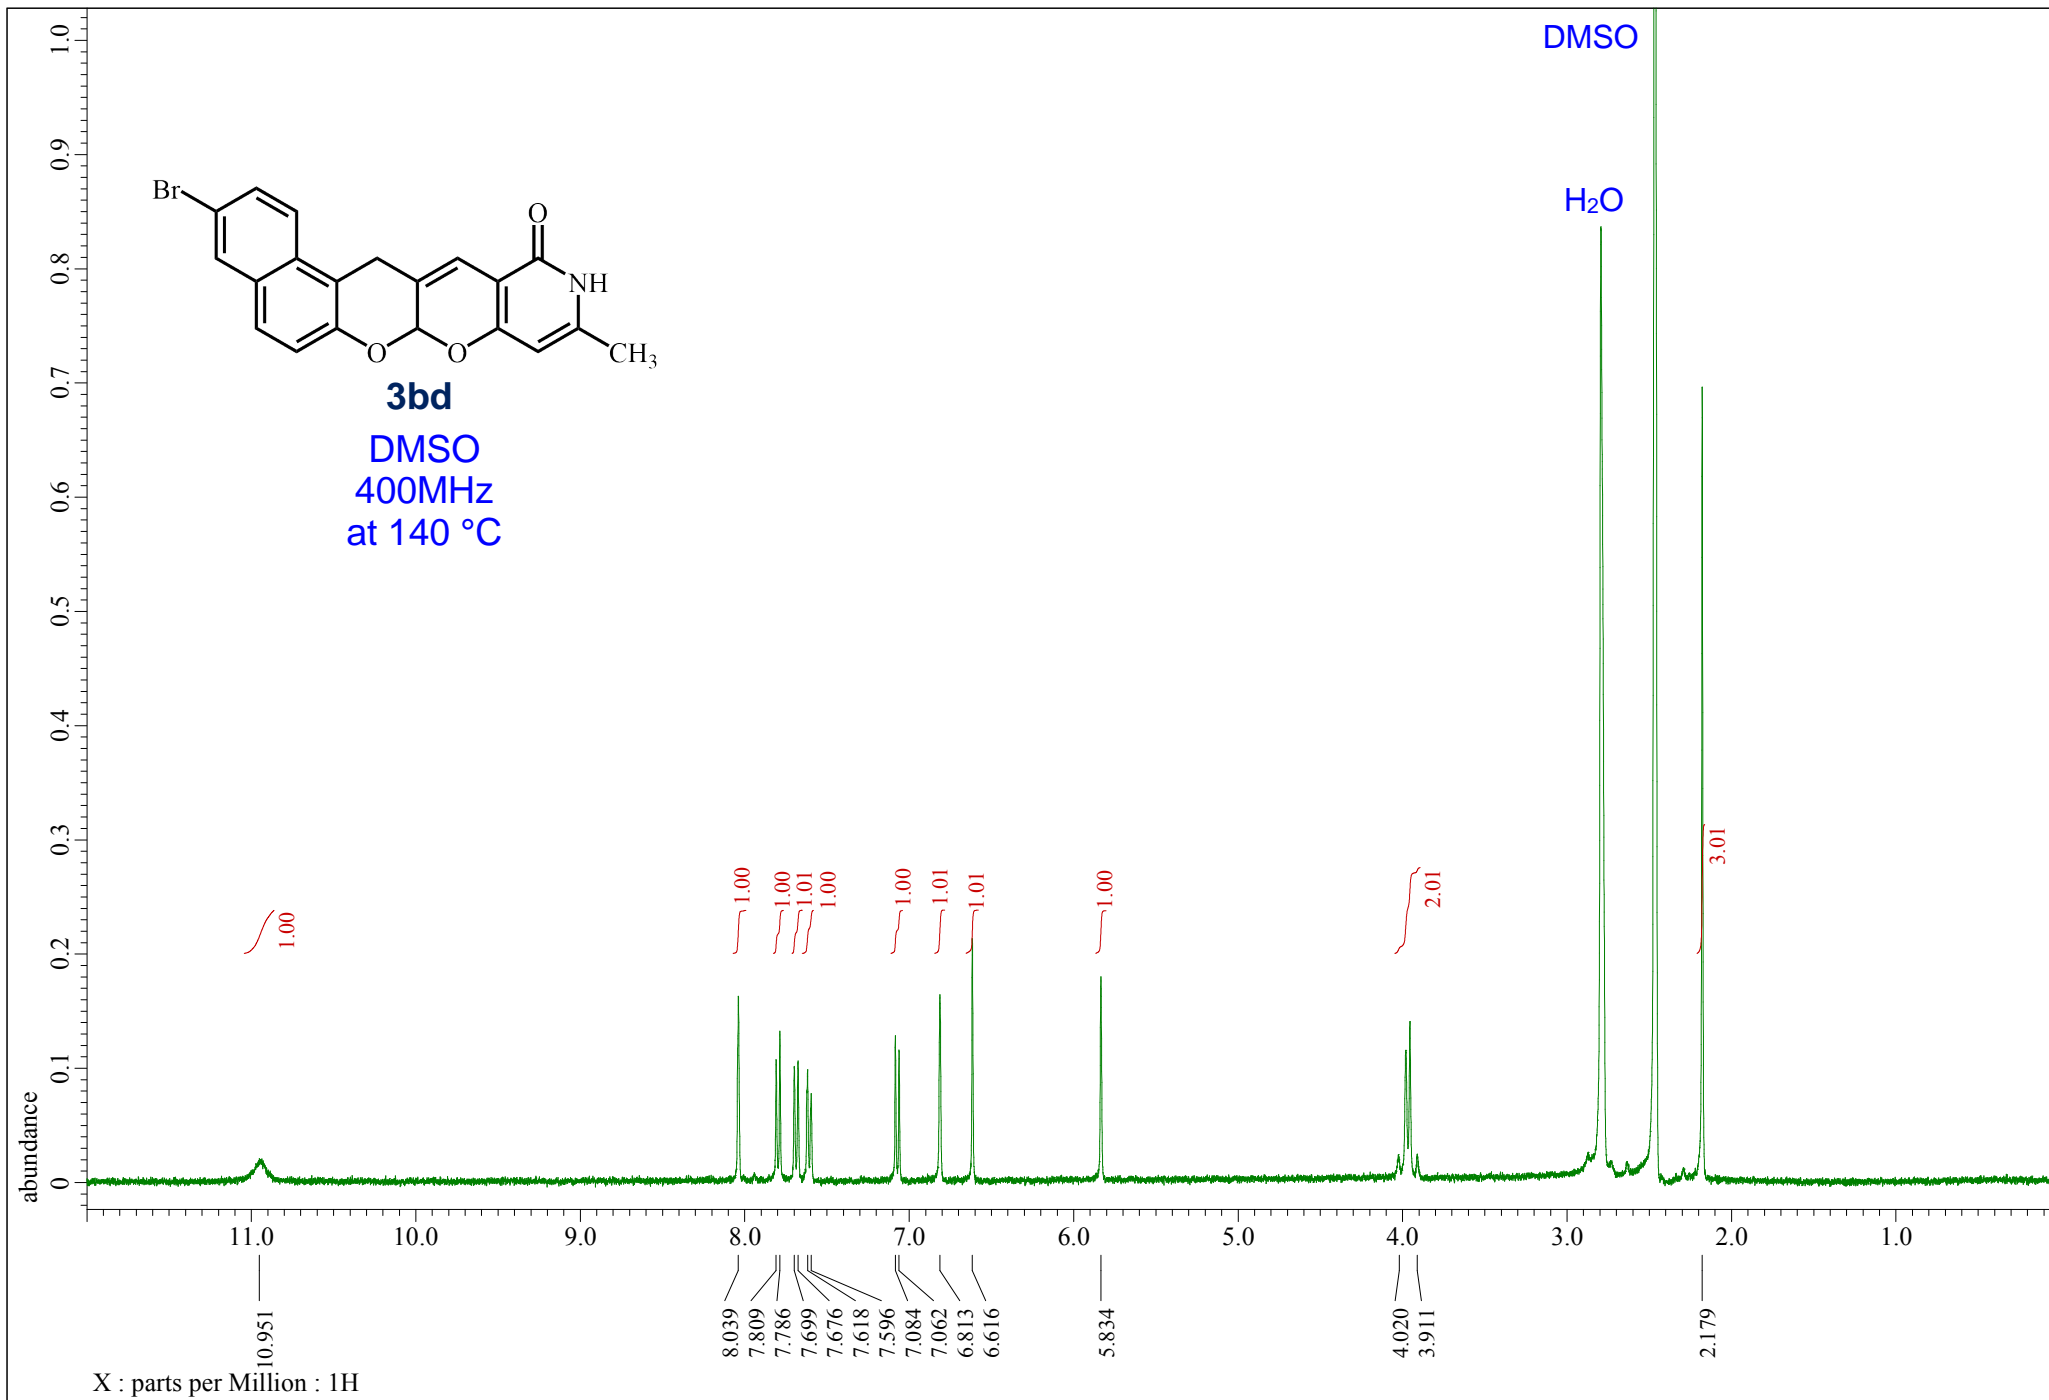

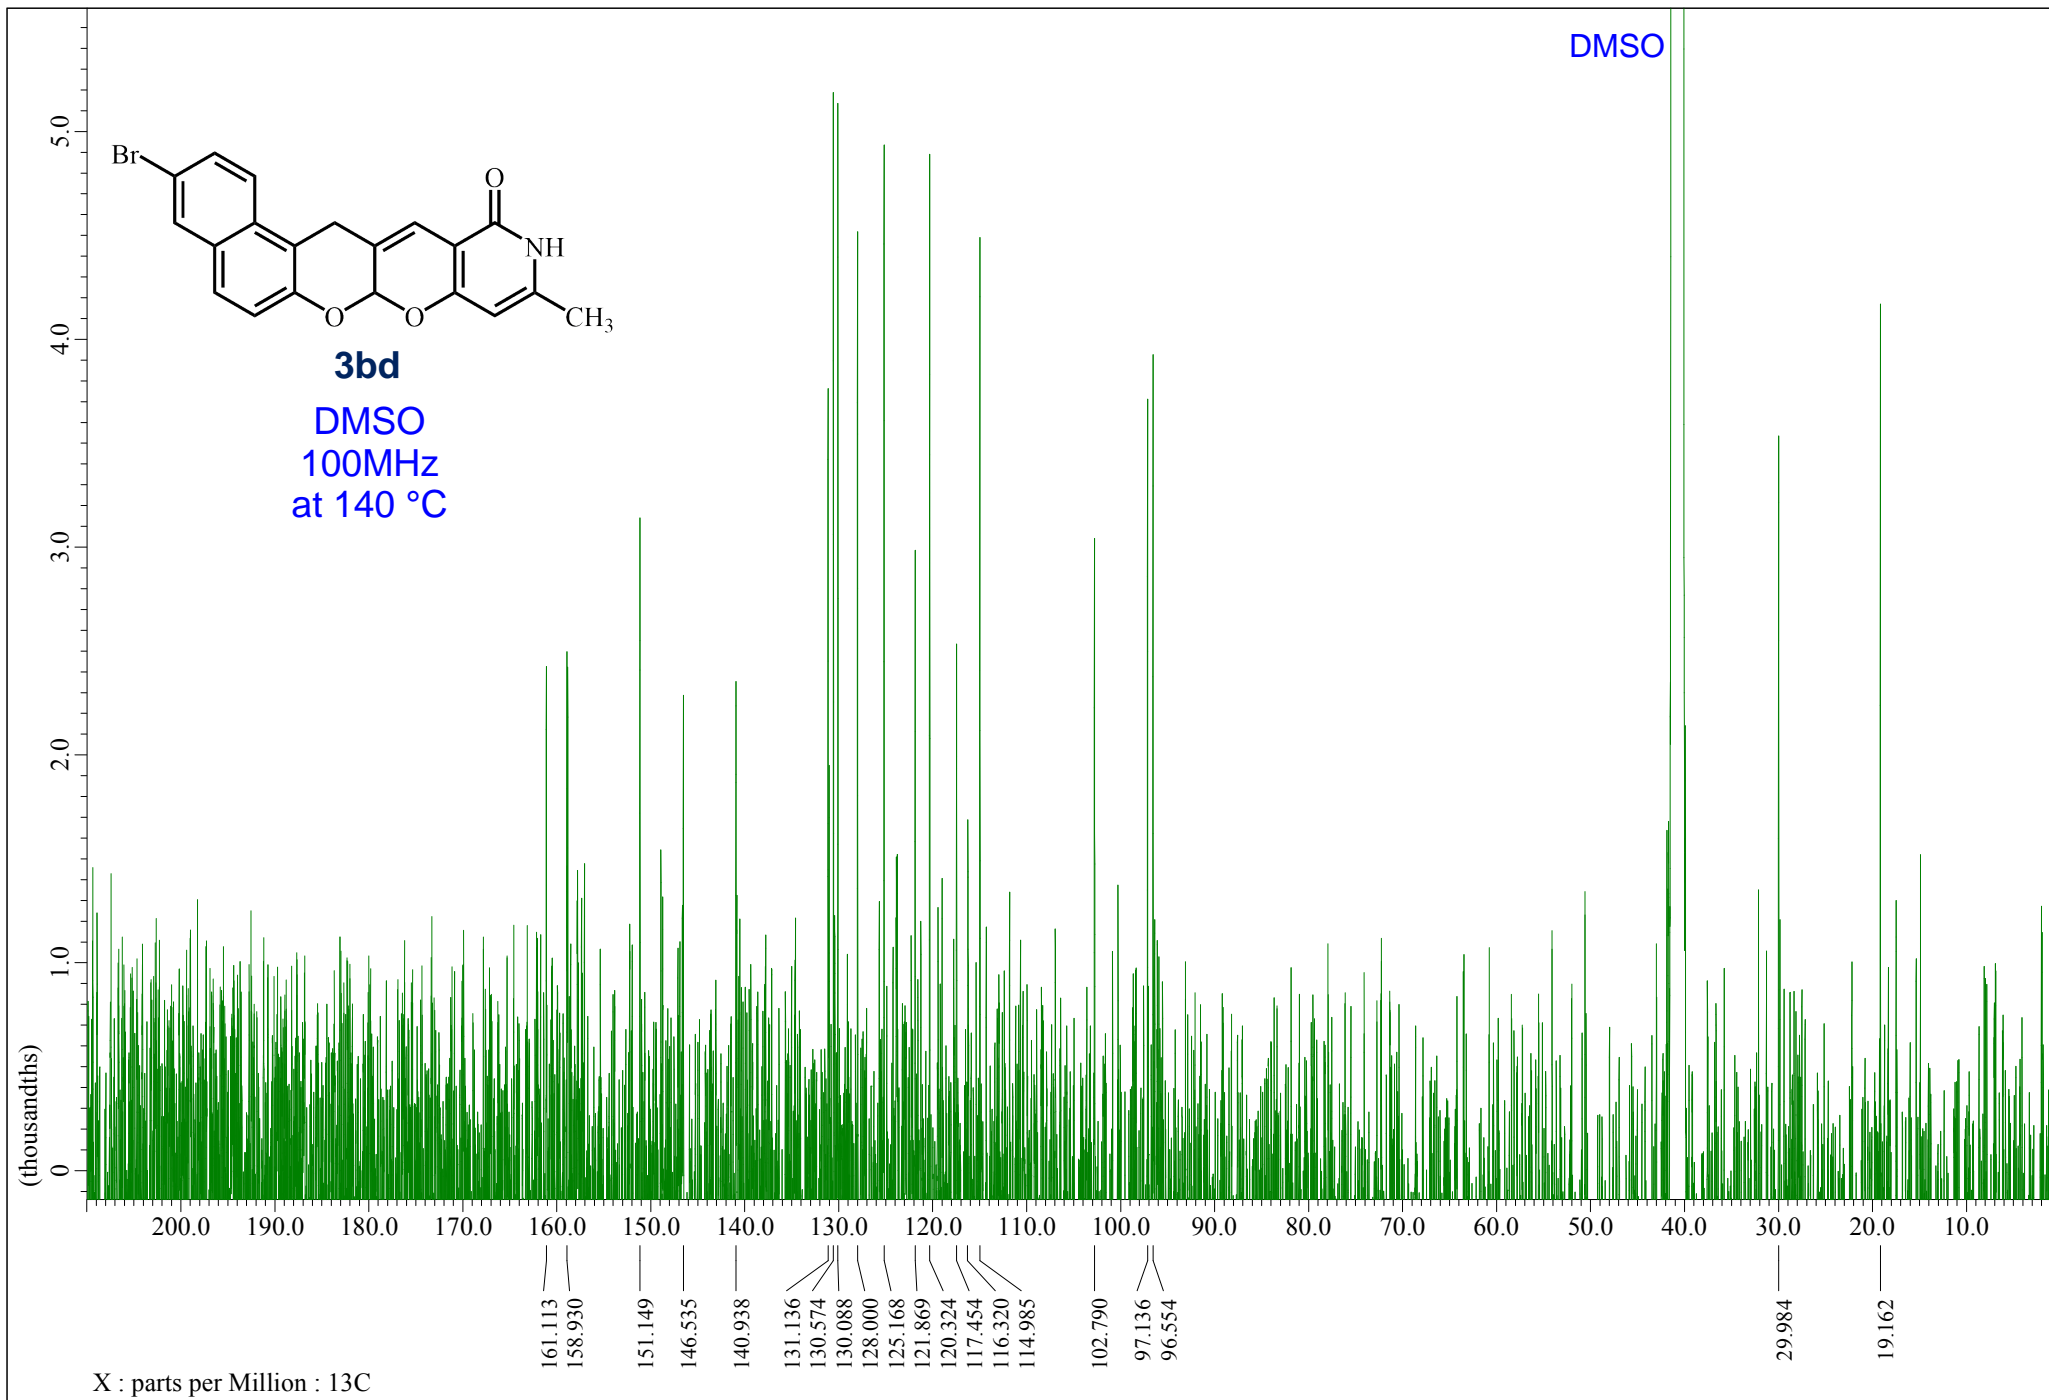



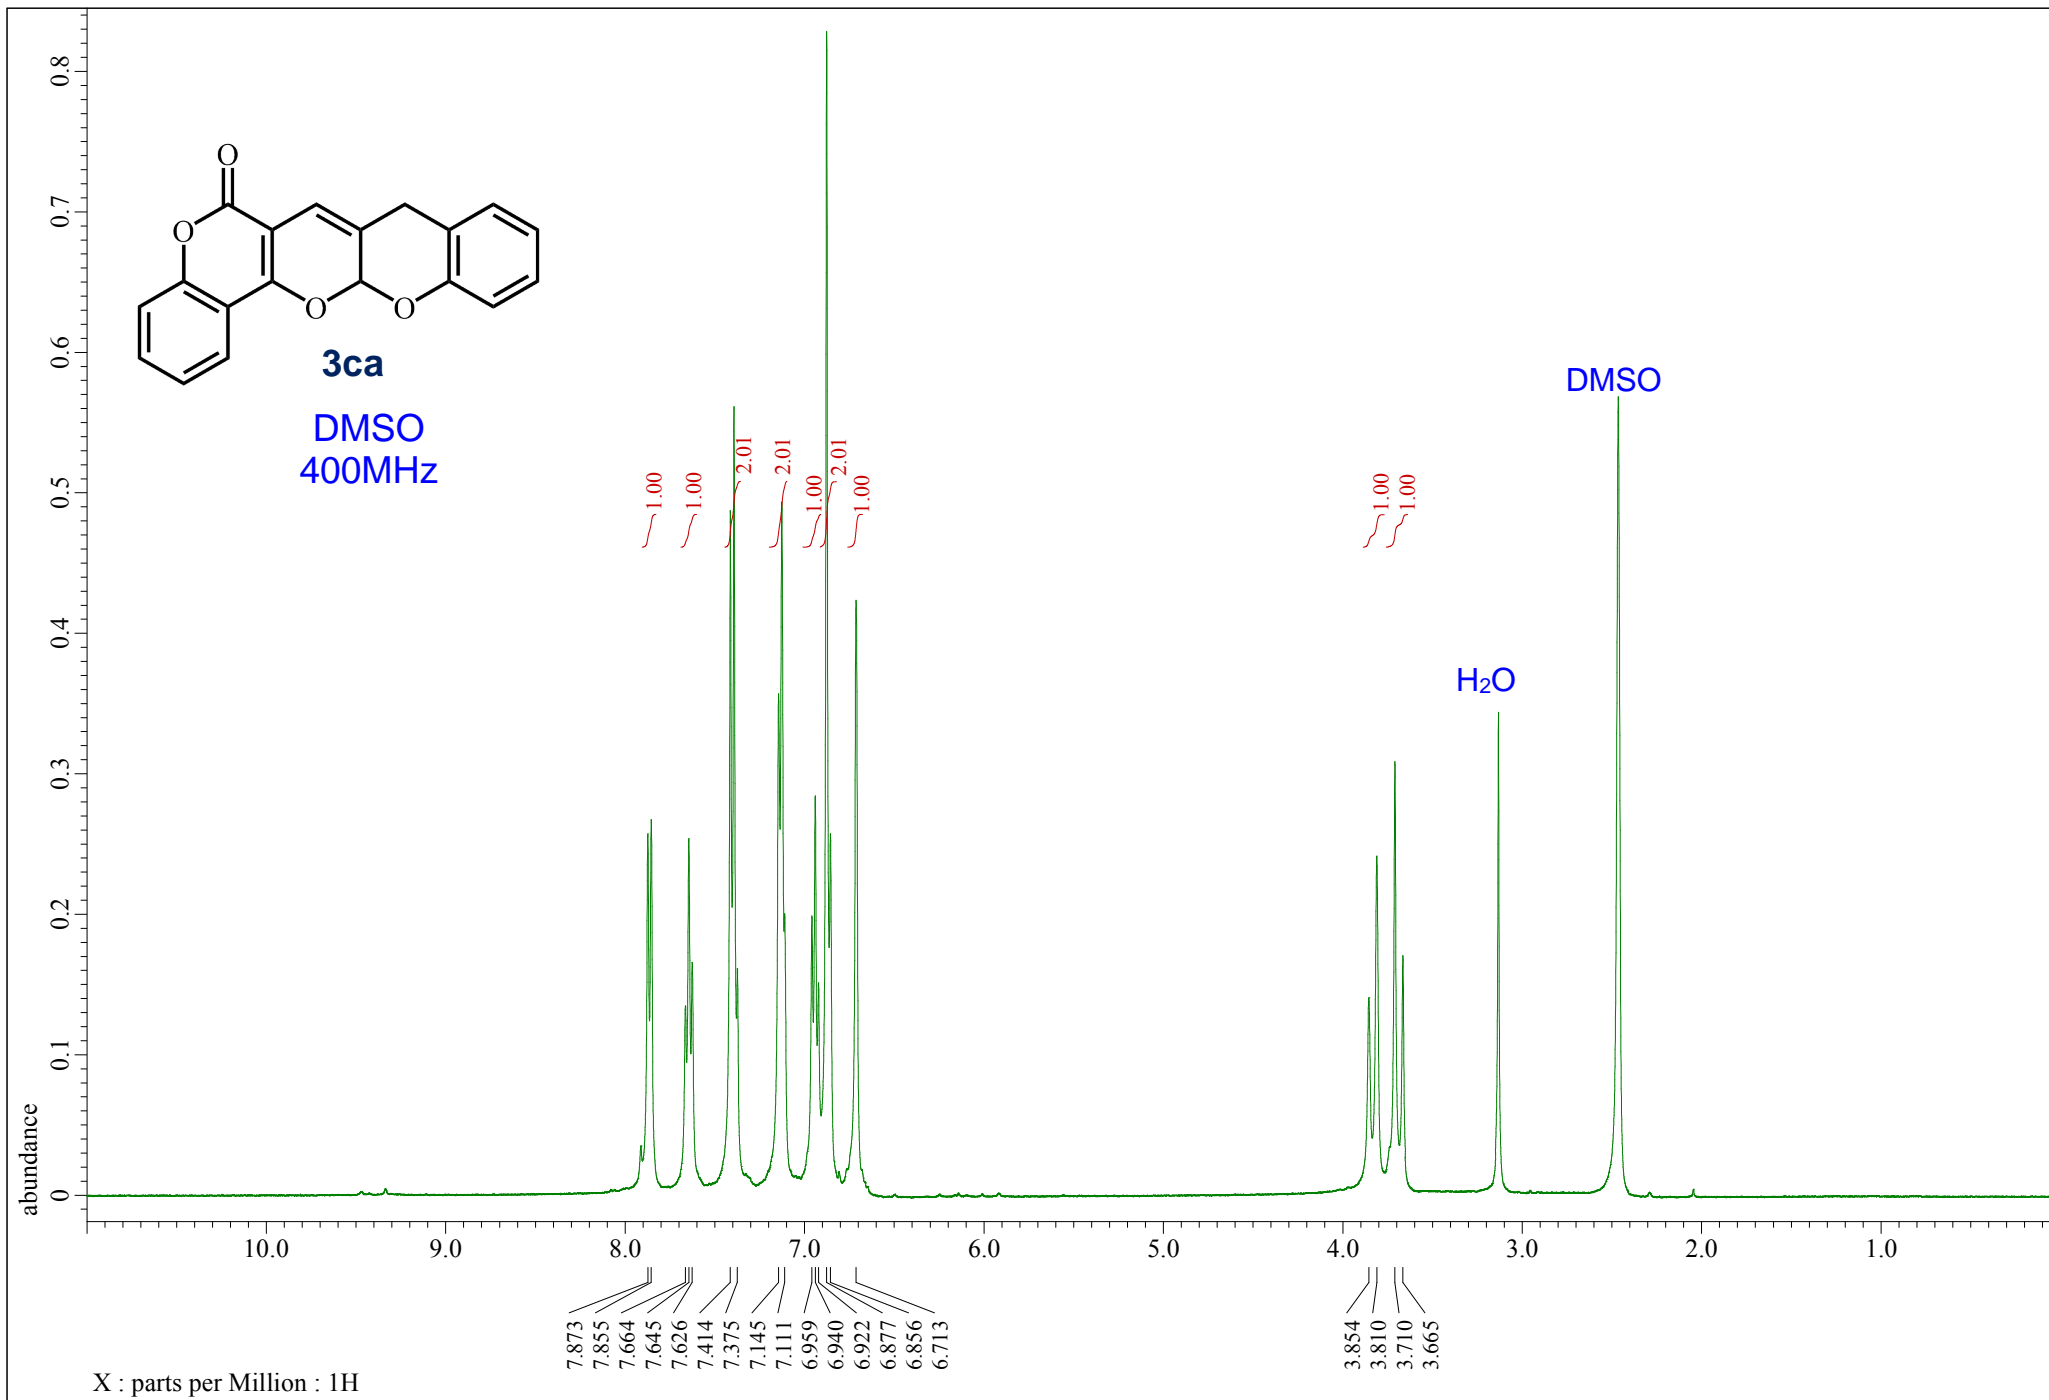

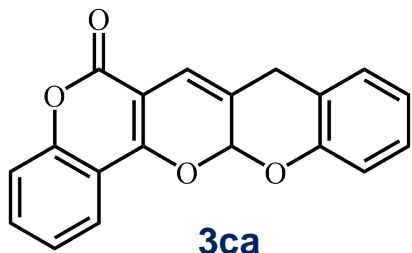

DMSO  
100MHz

DMSO

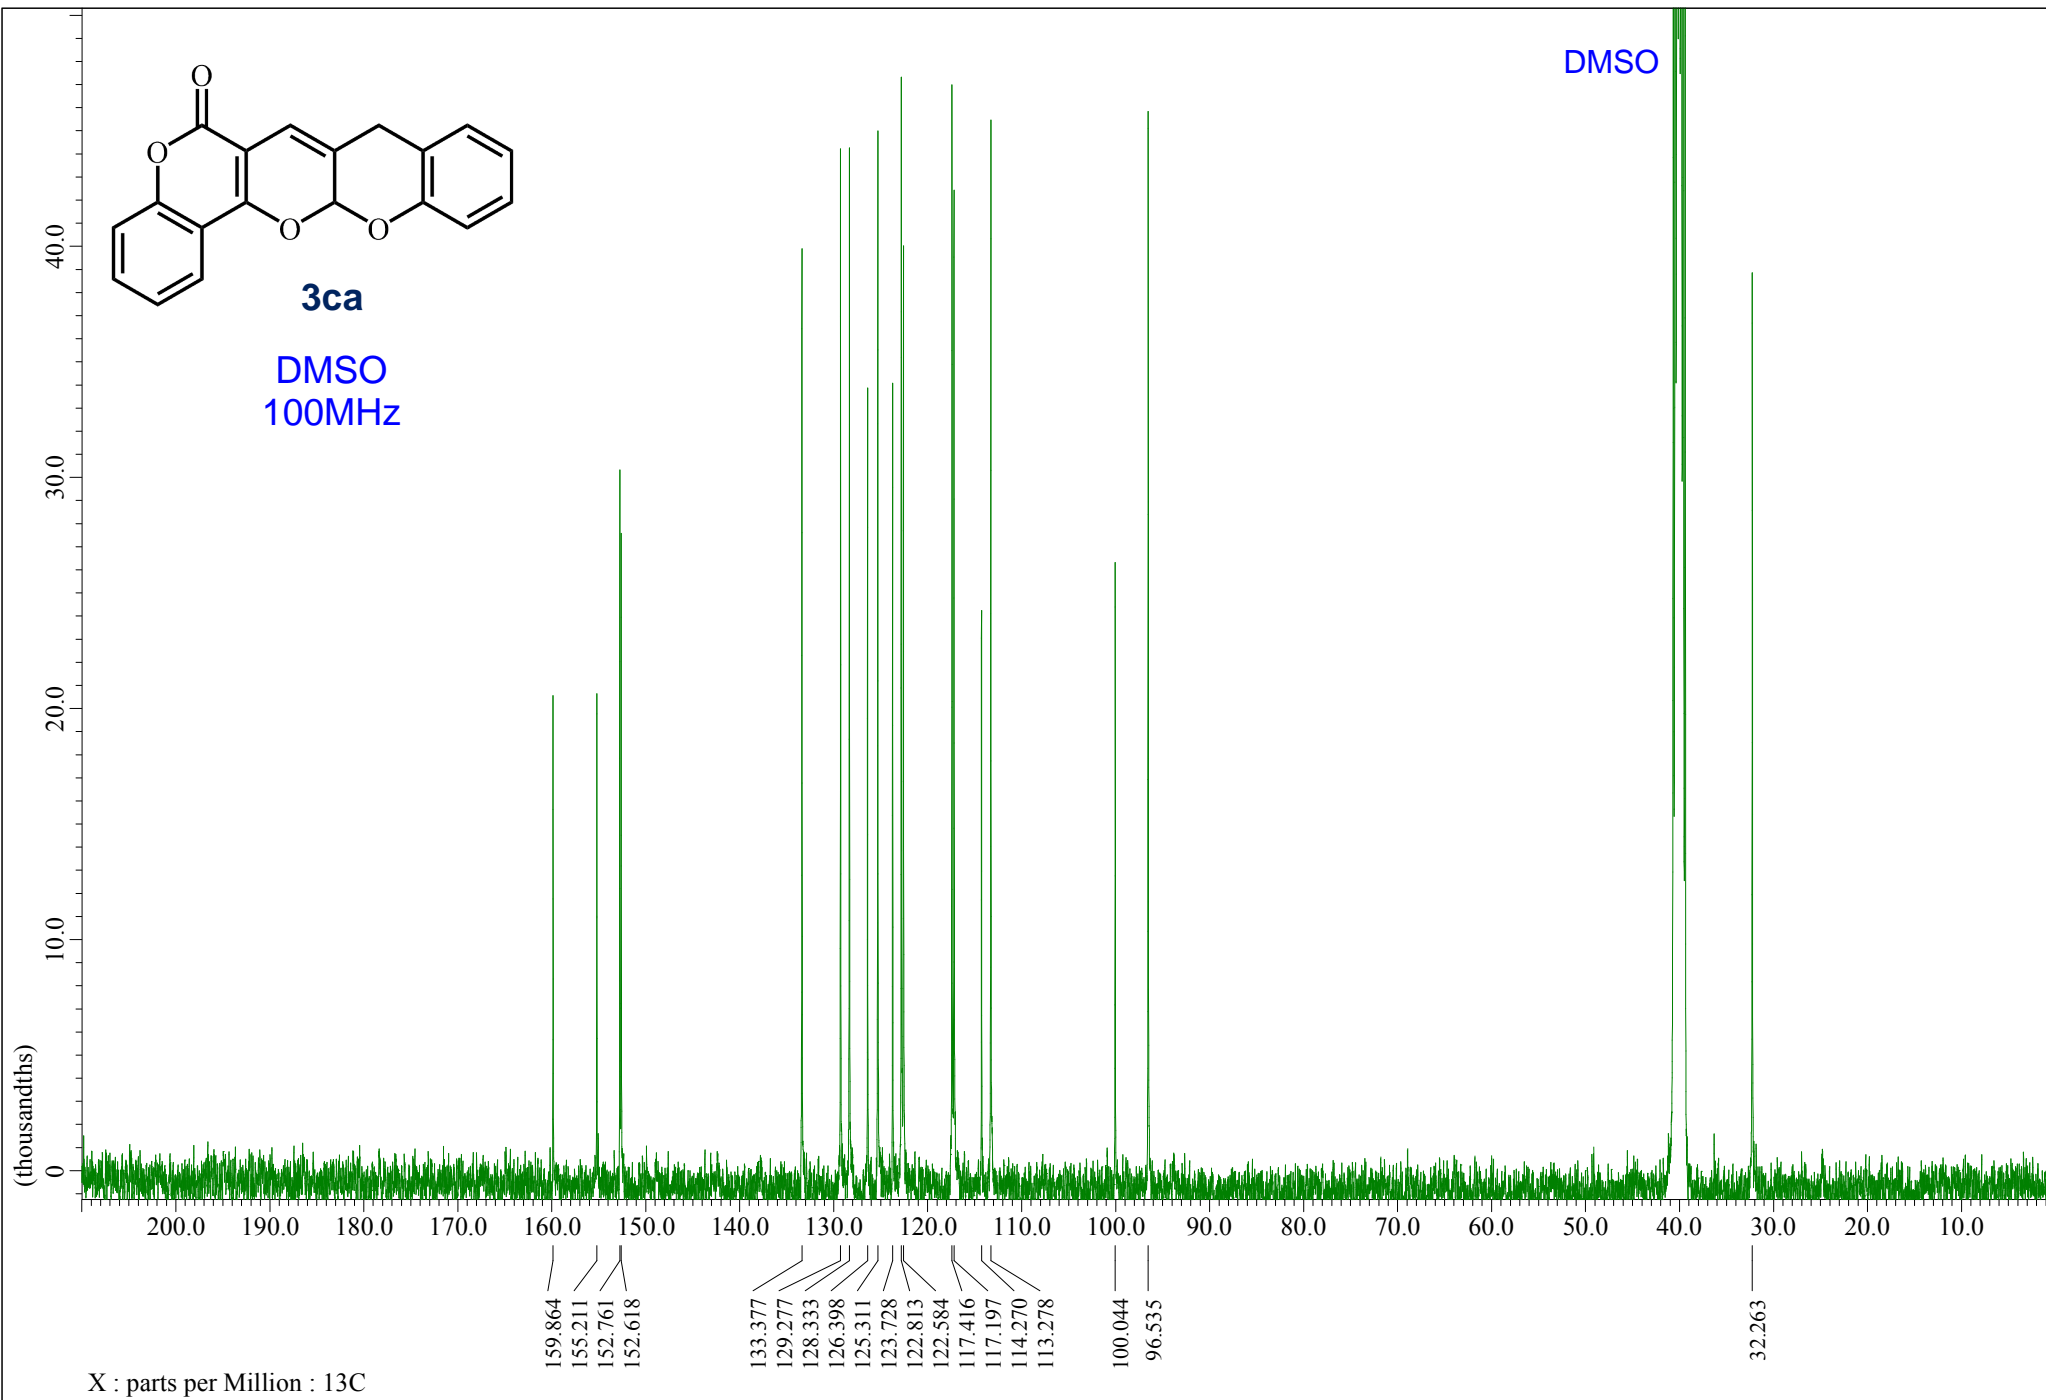

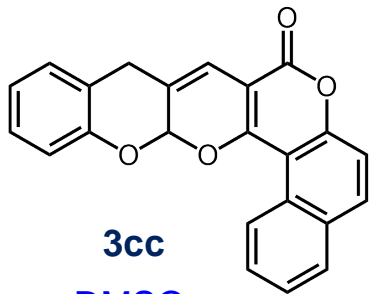

**3cc**

**DMSO**  
**400MHz**

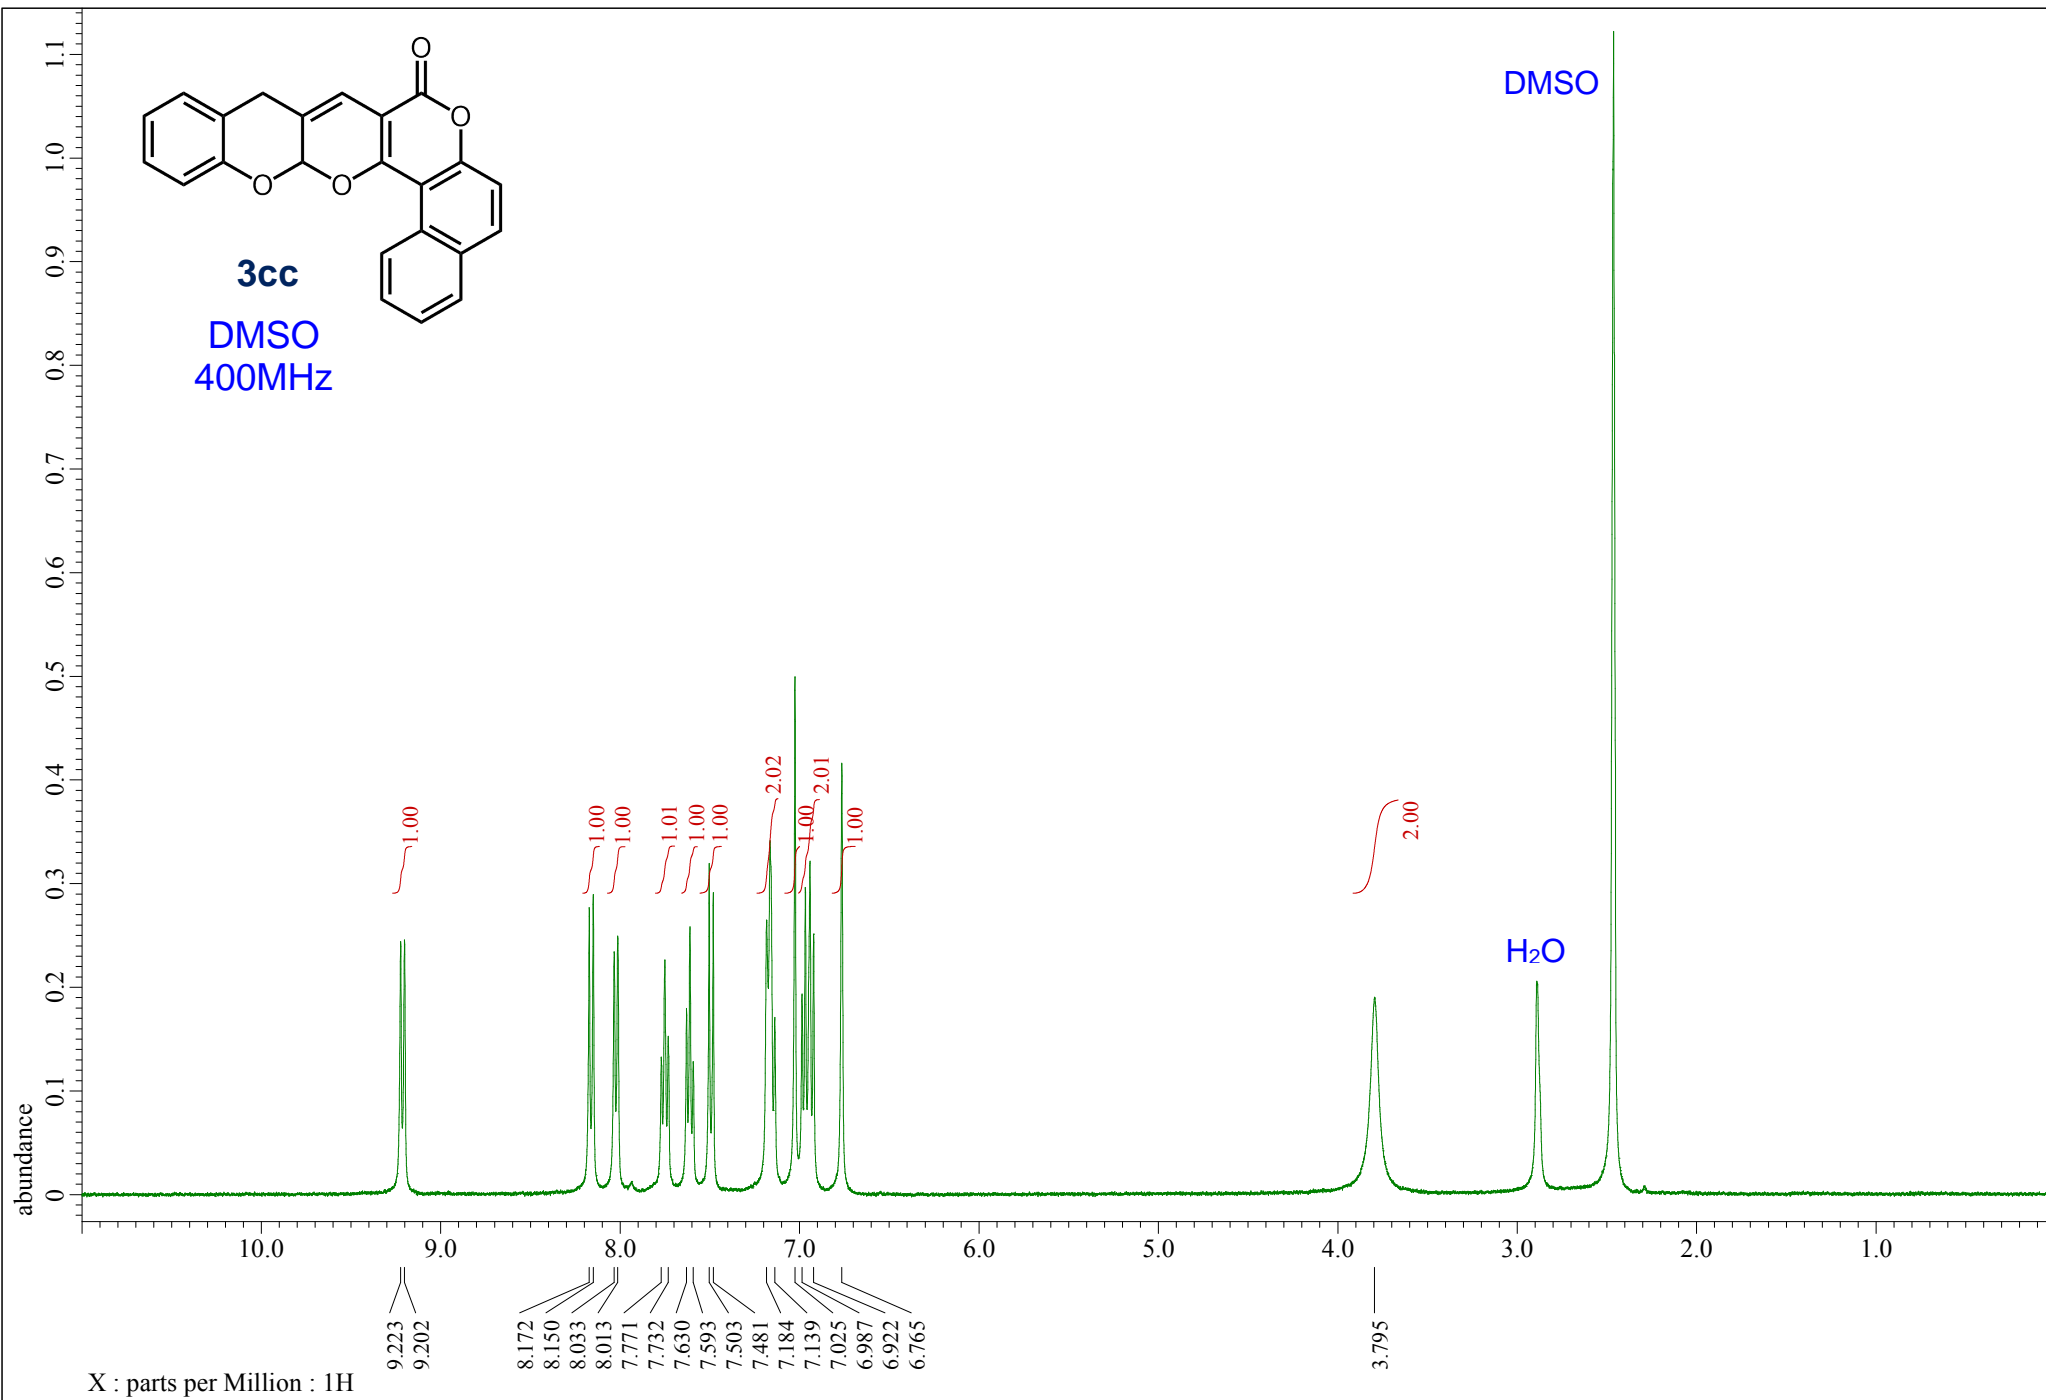

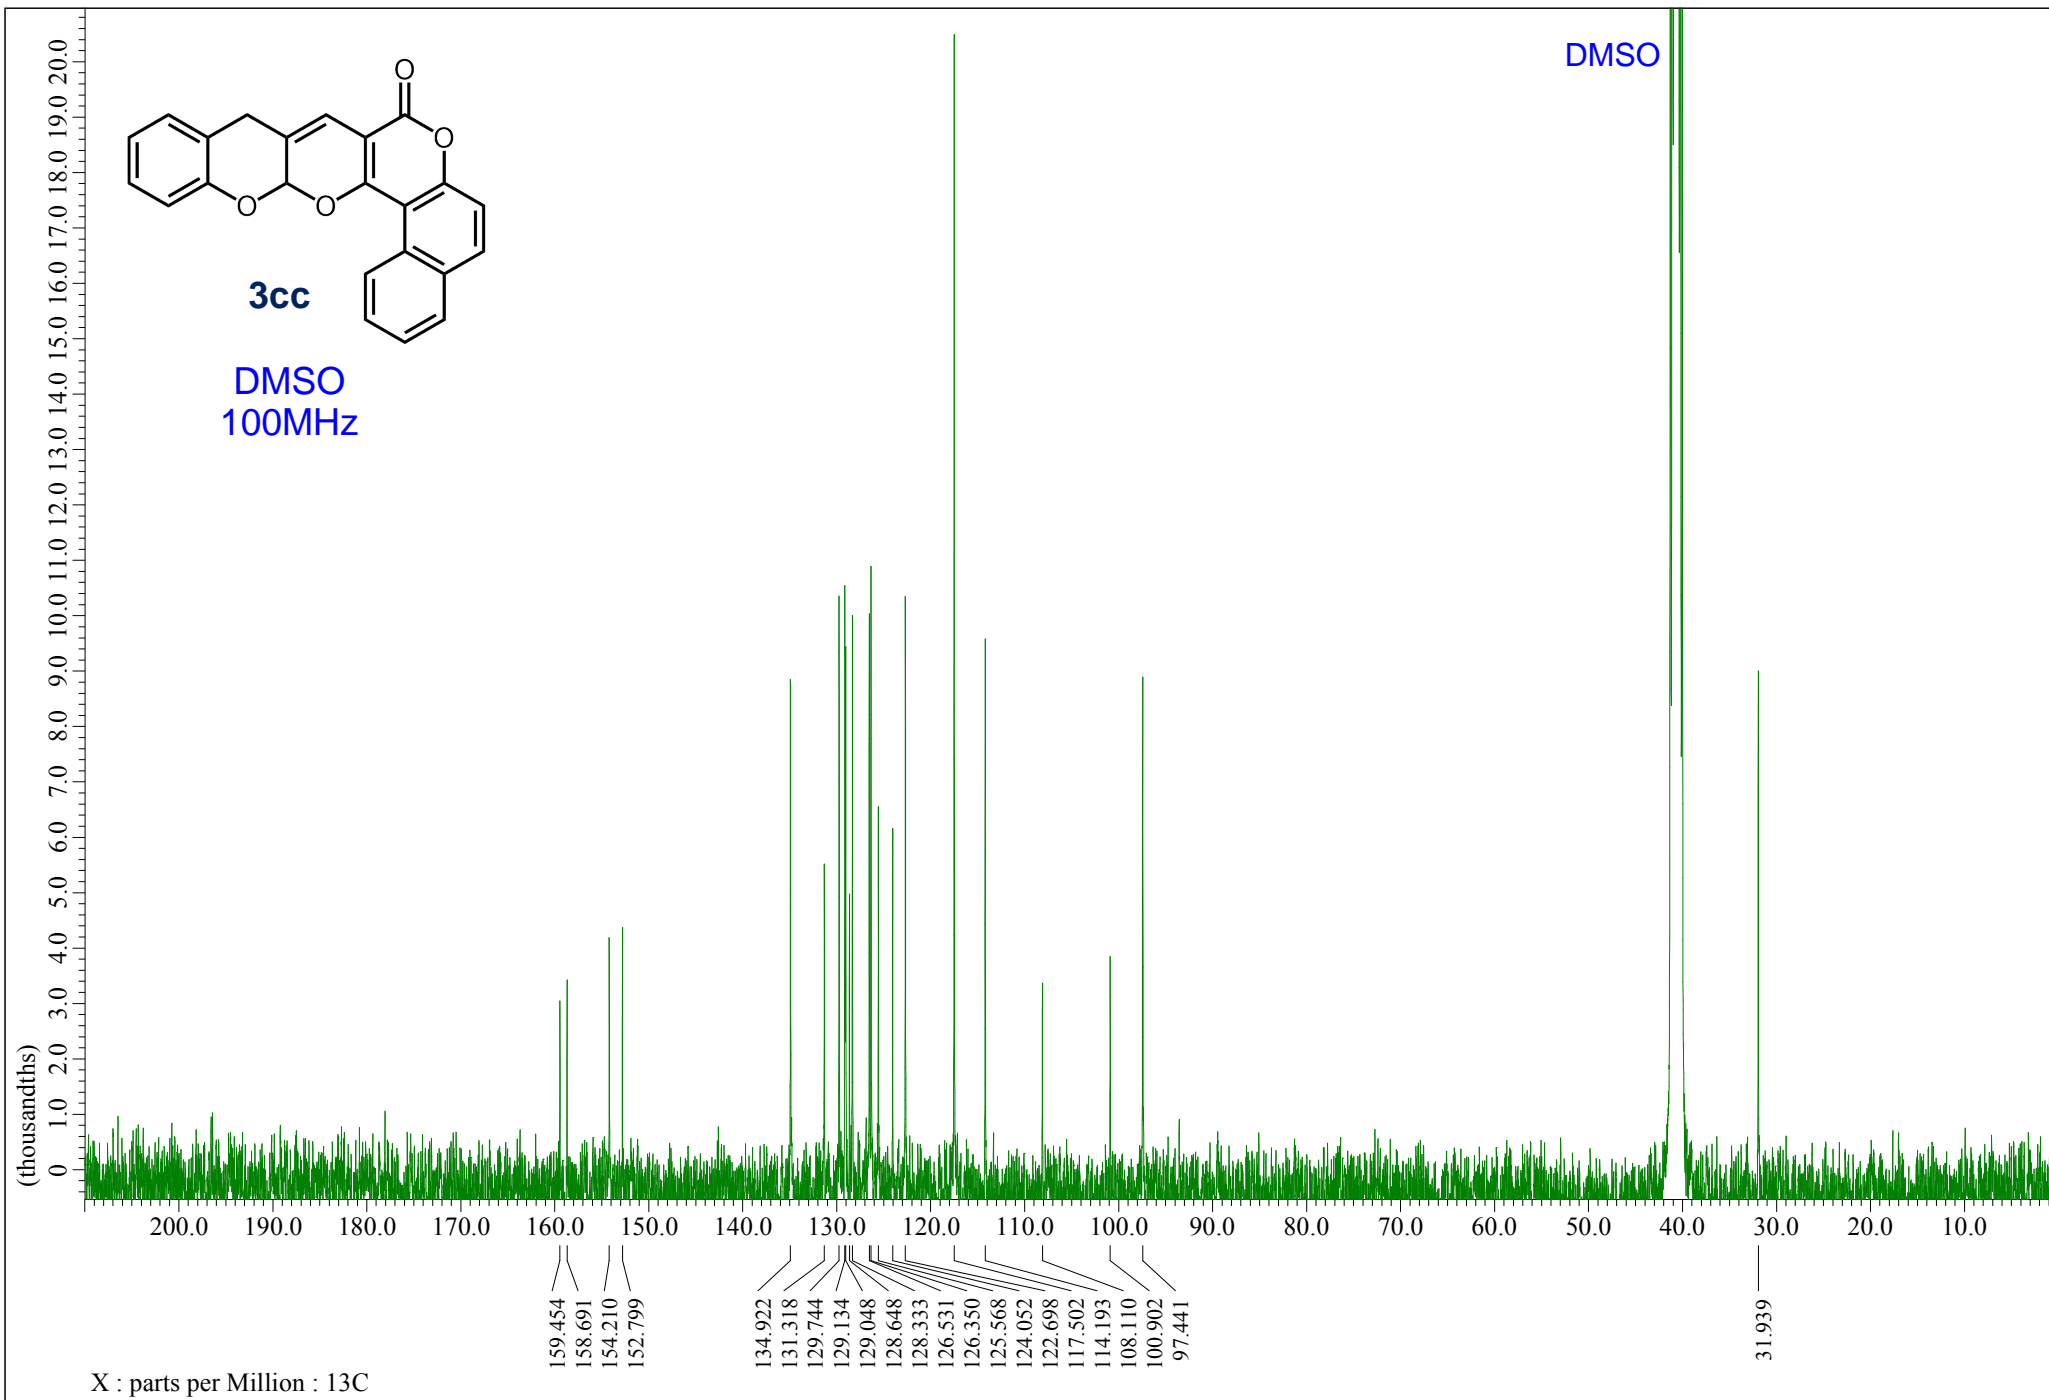

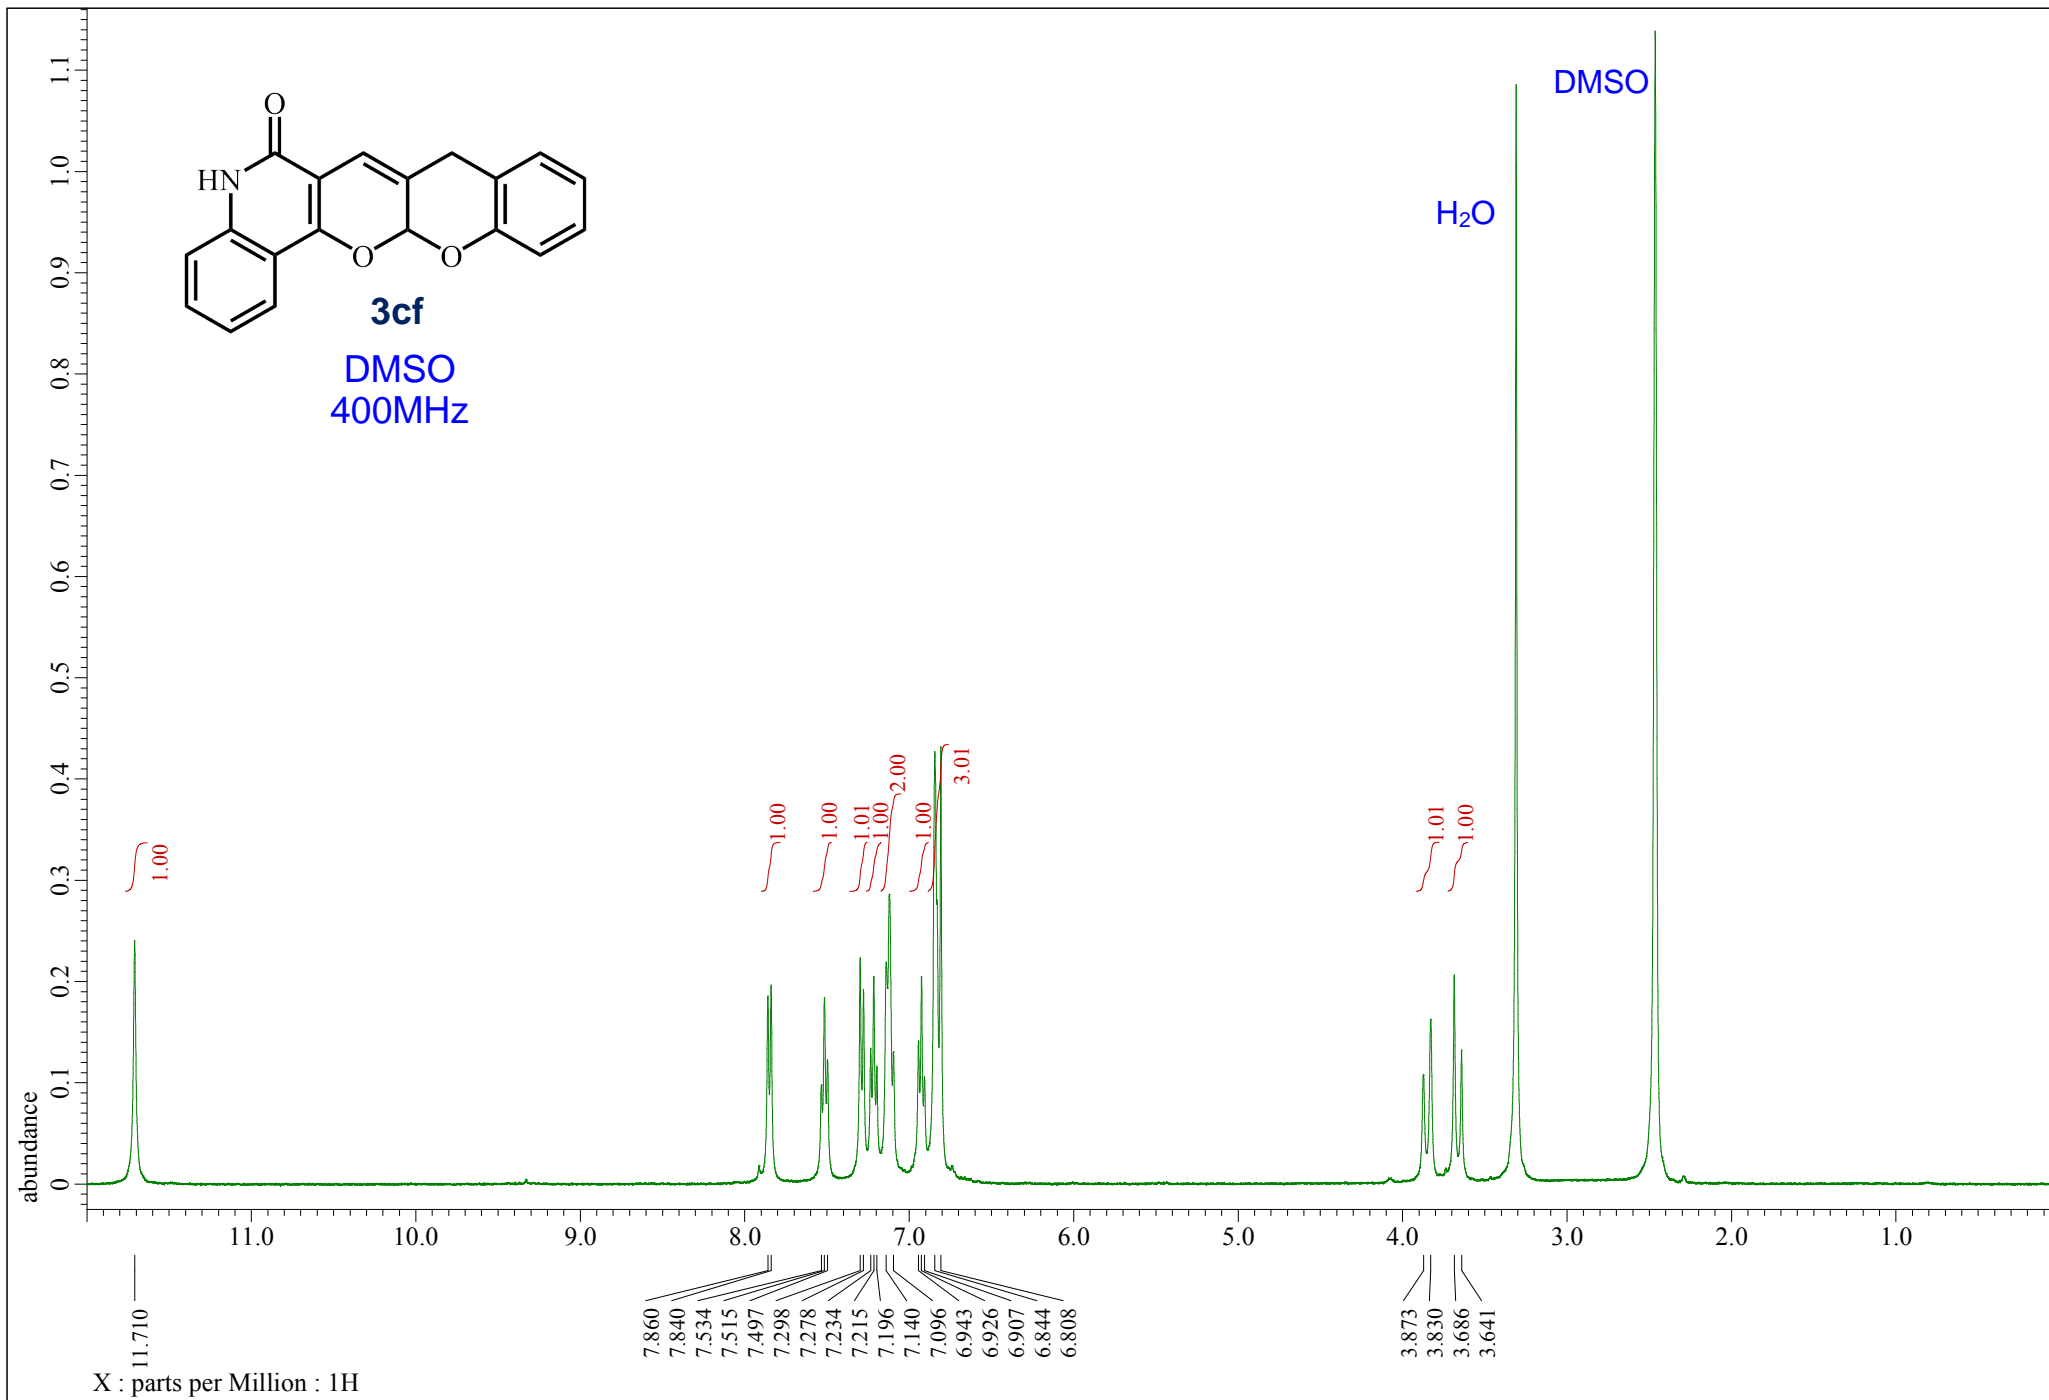

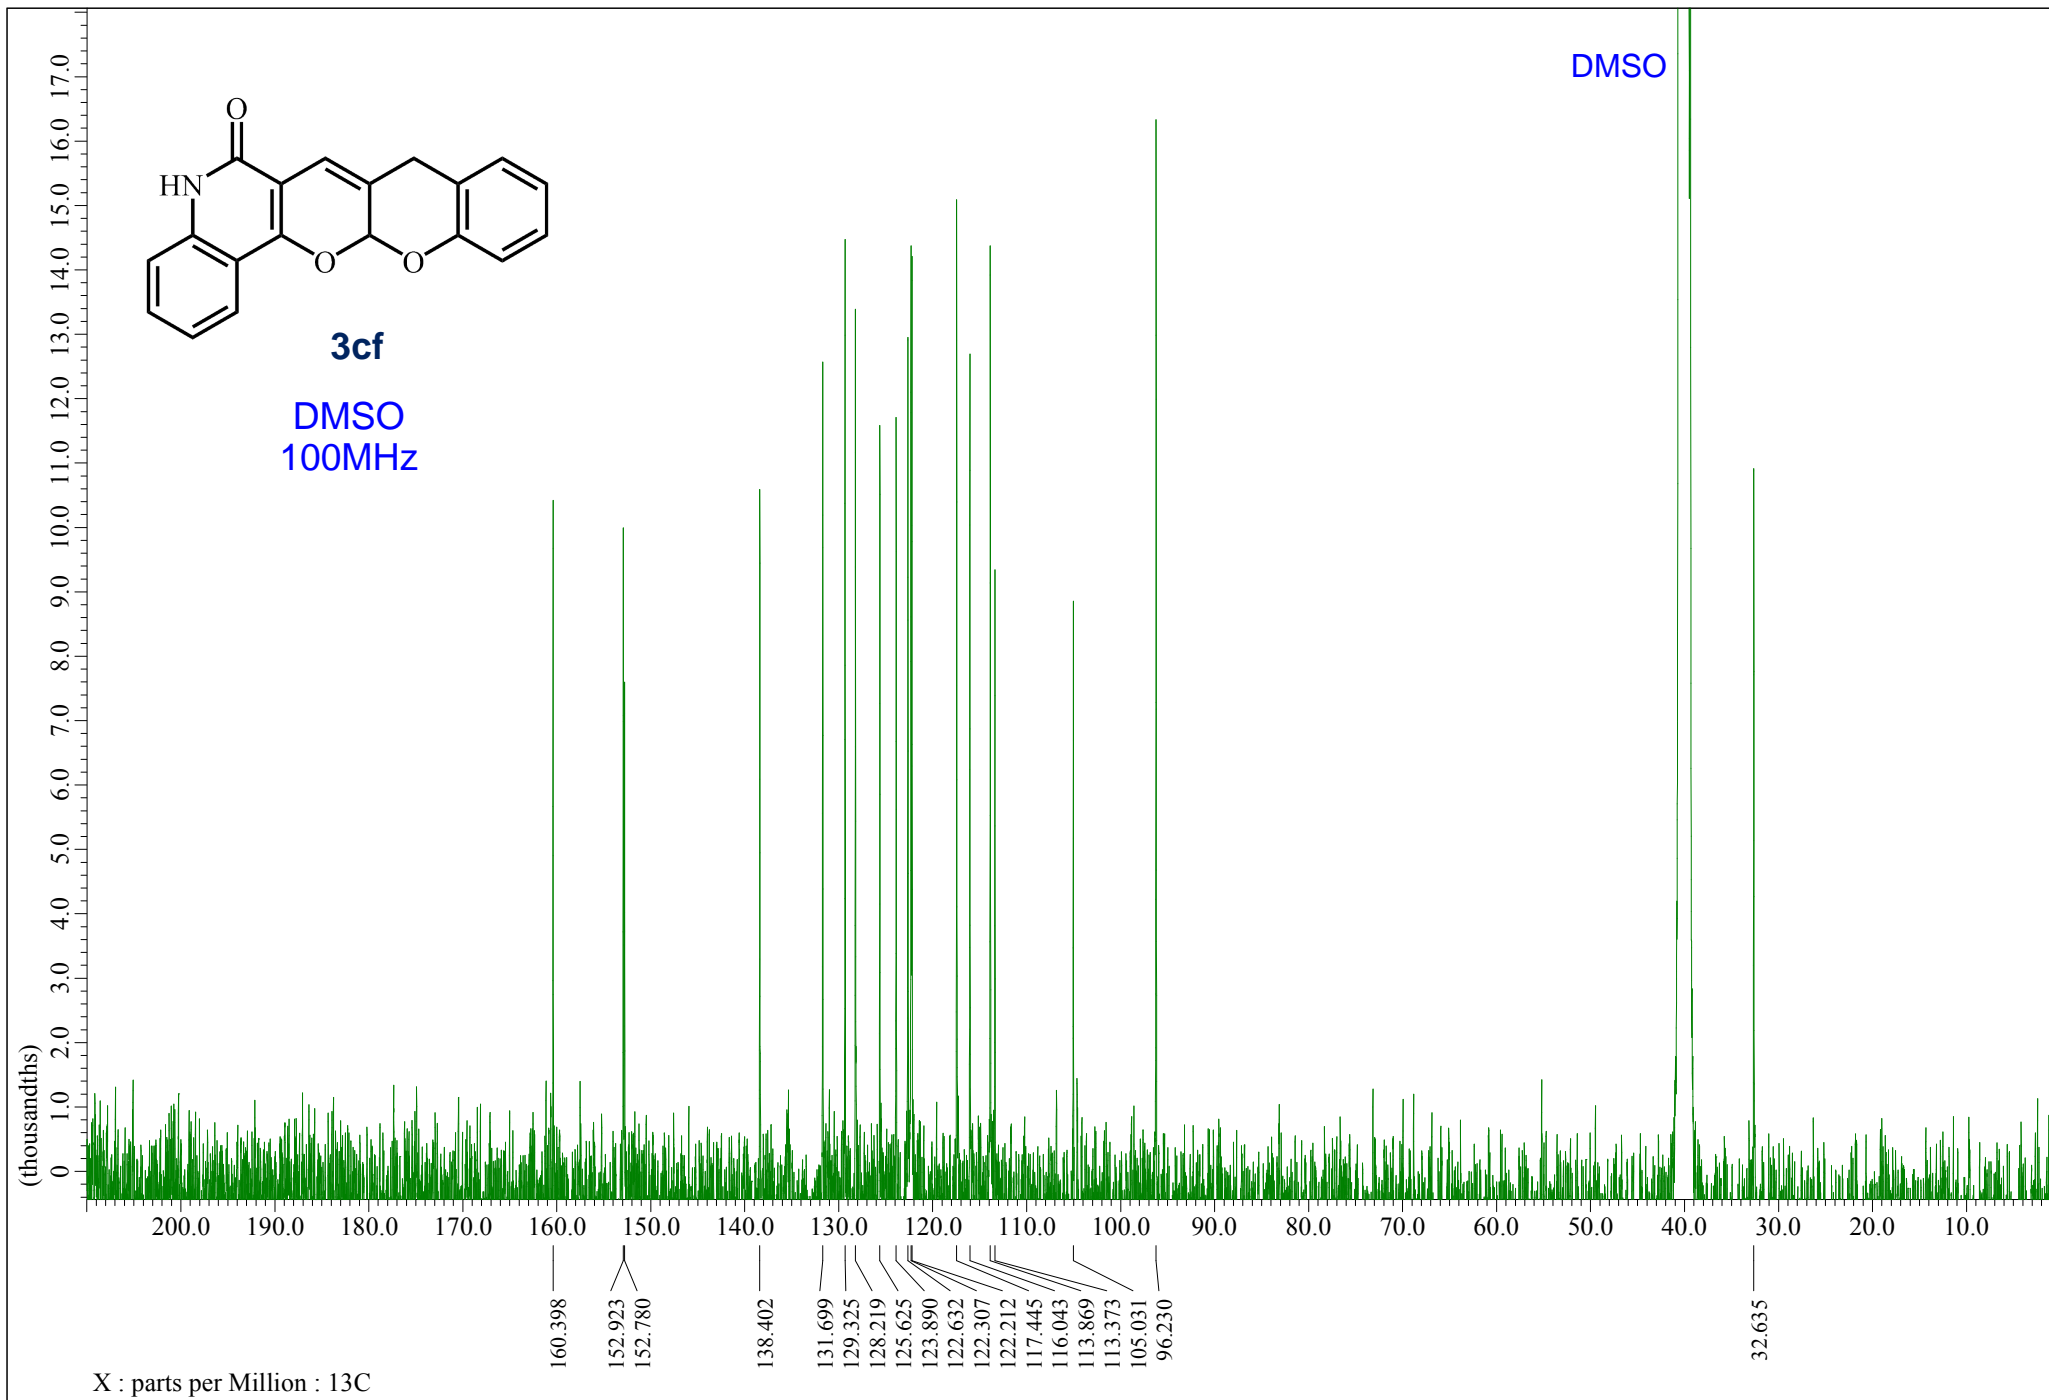

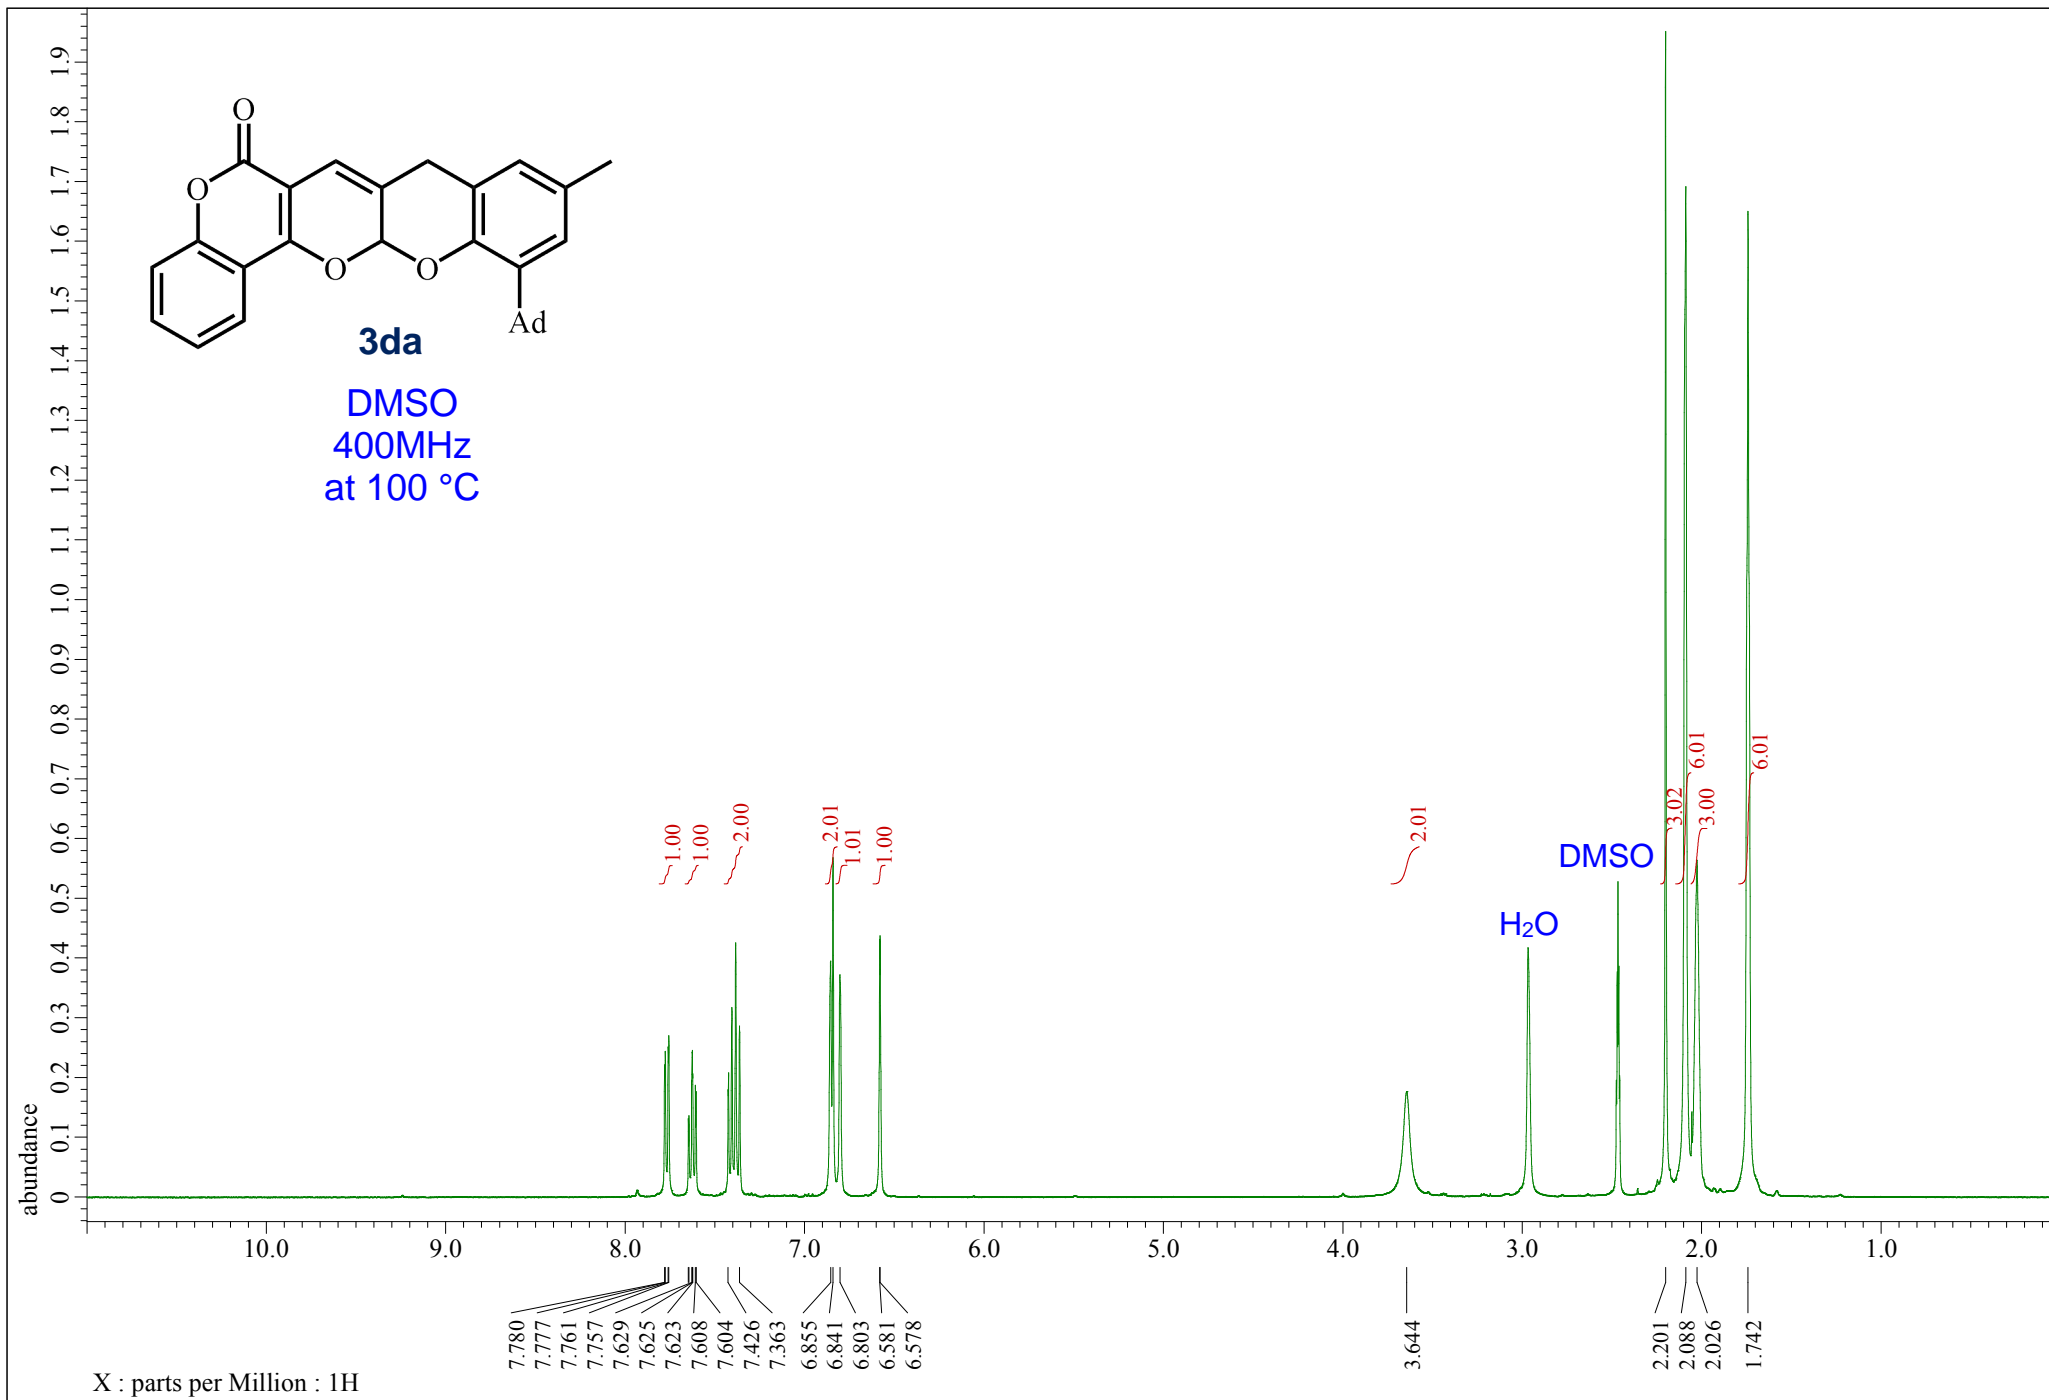

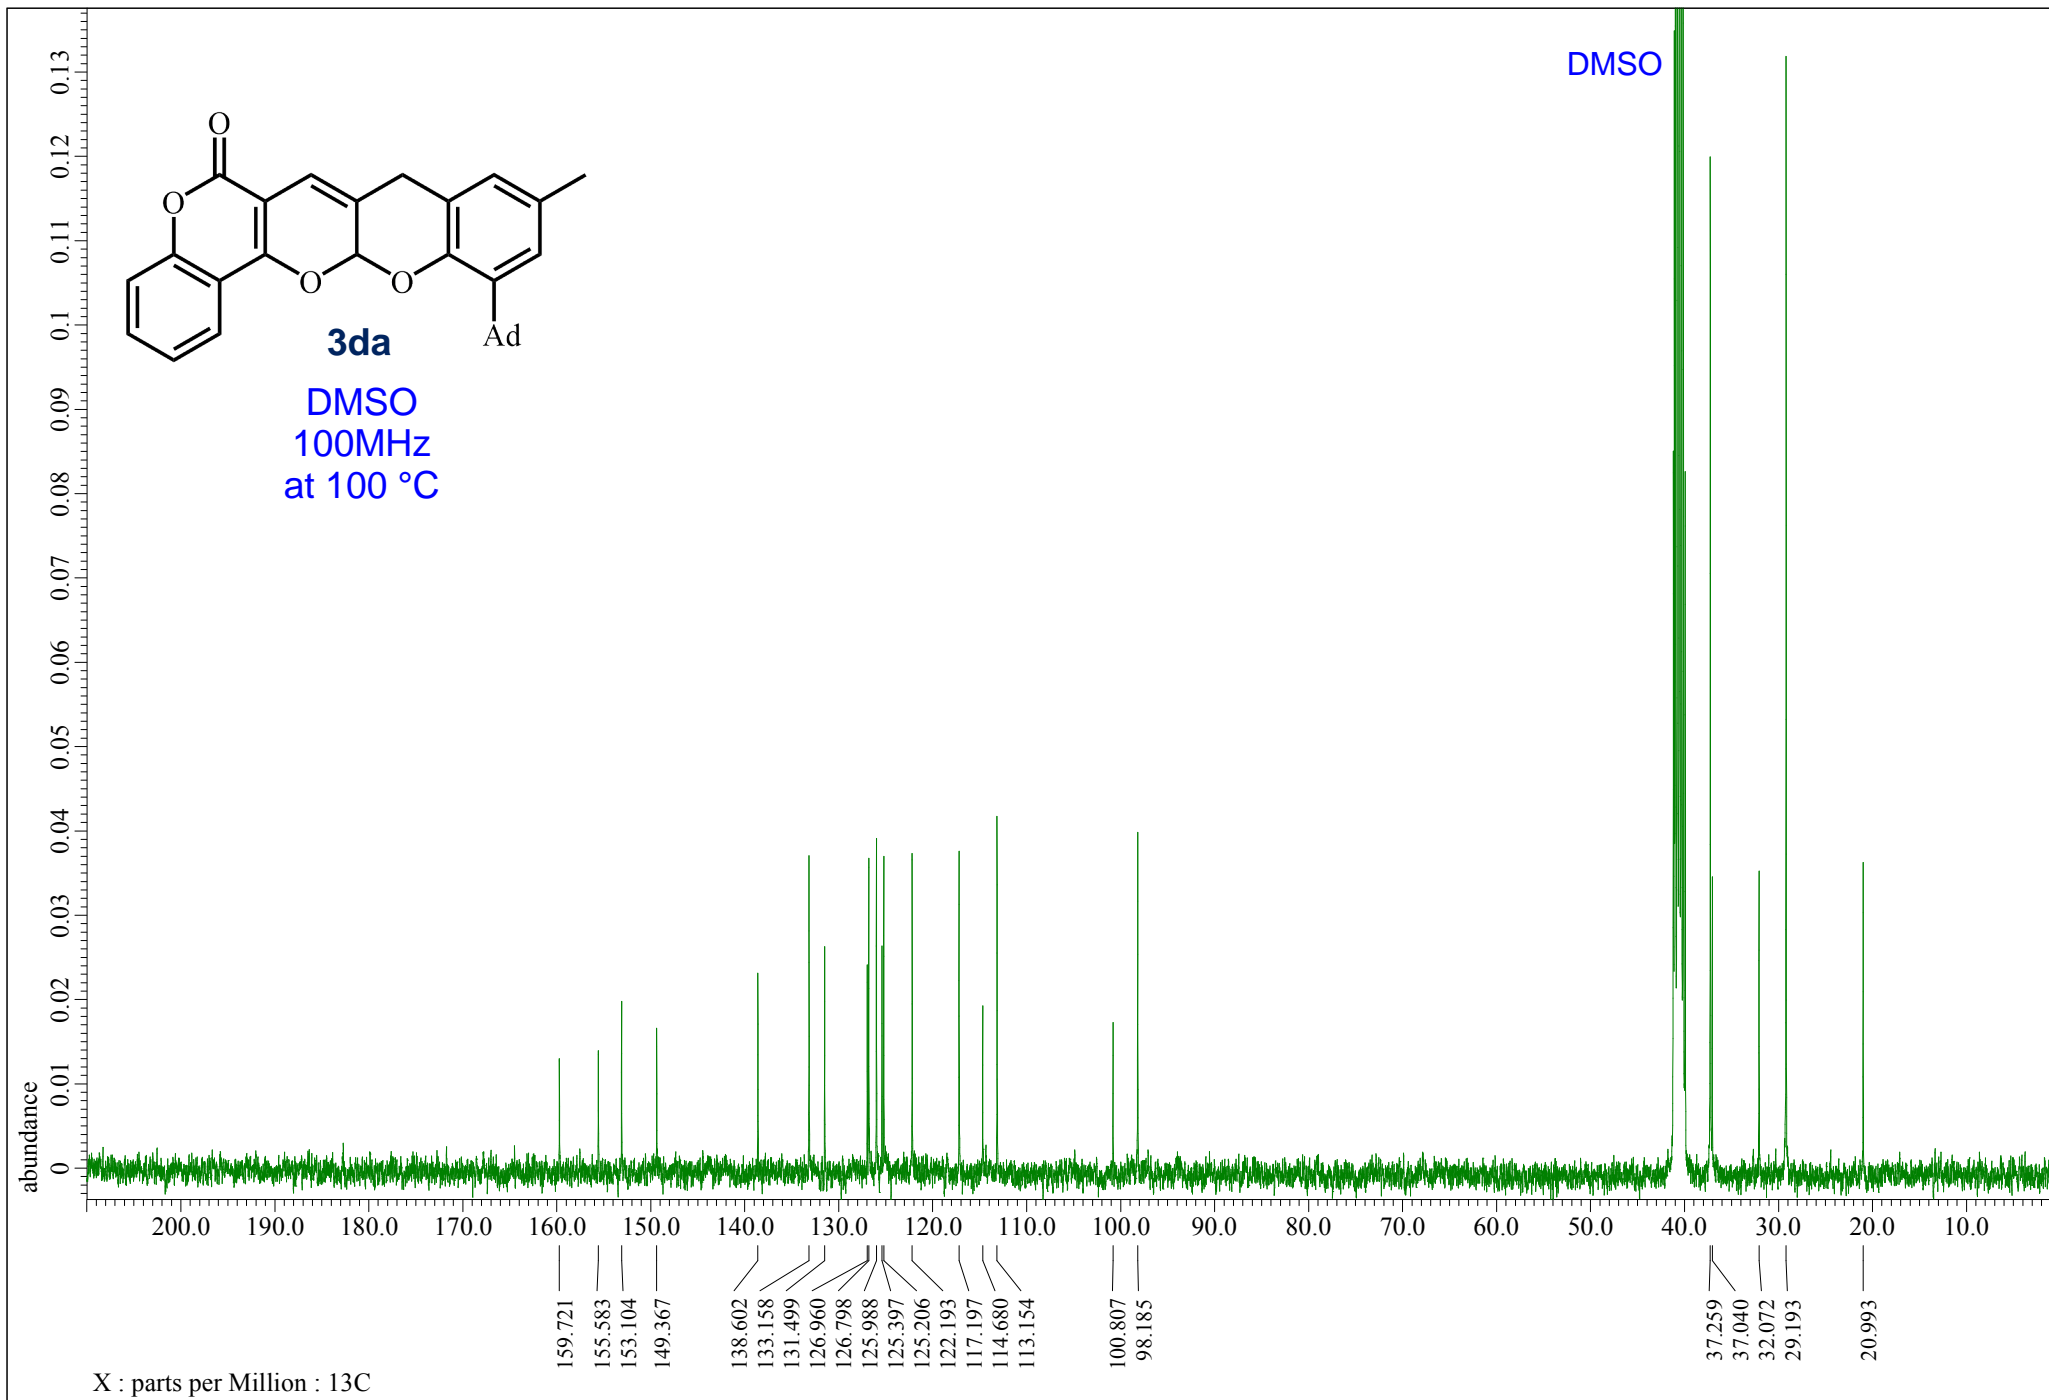



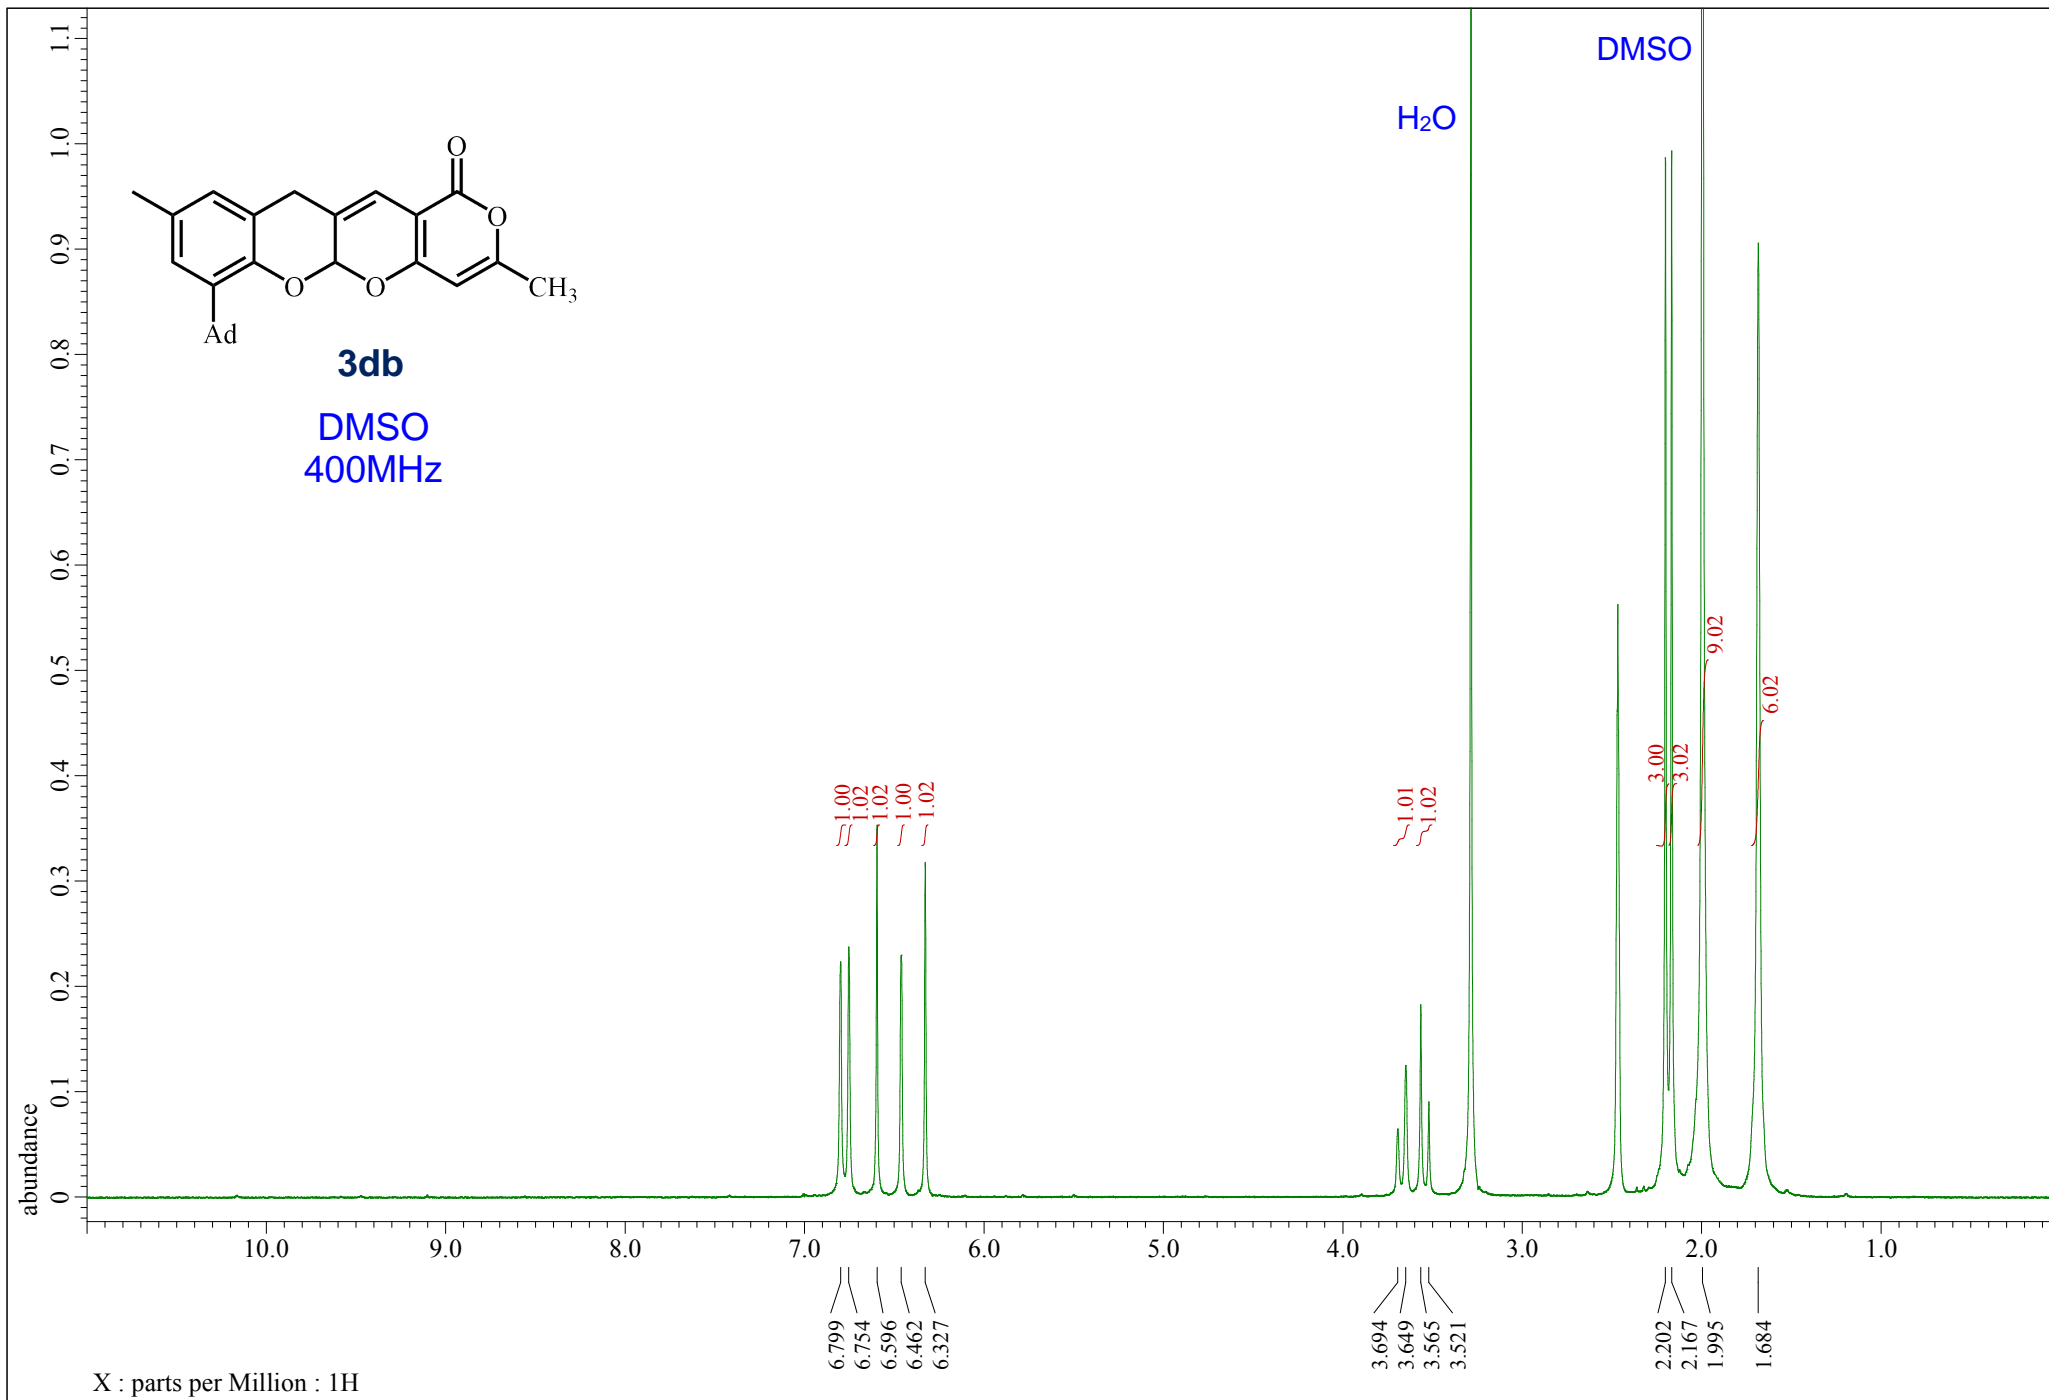

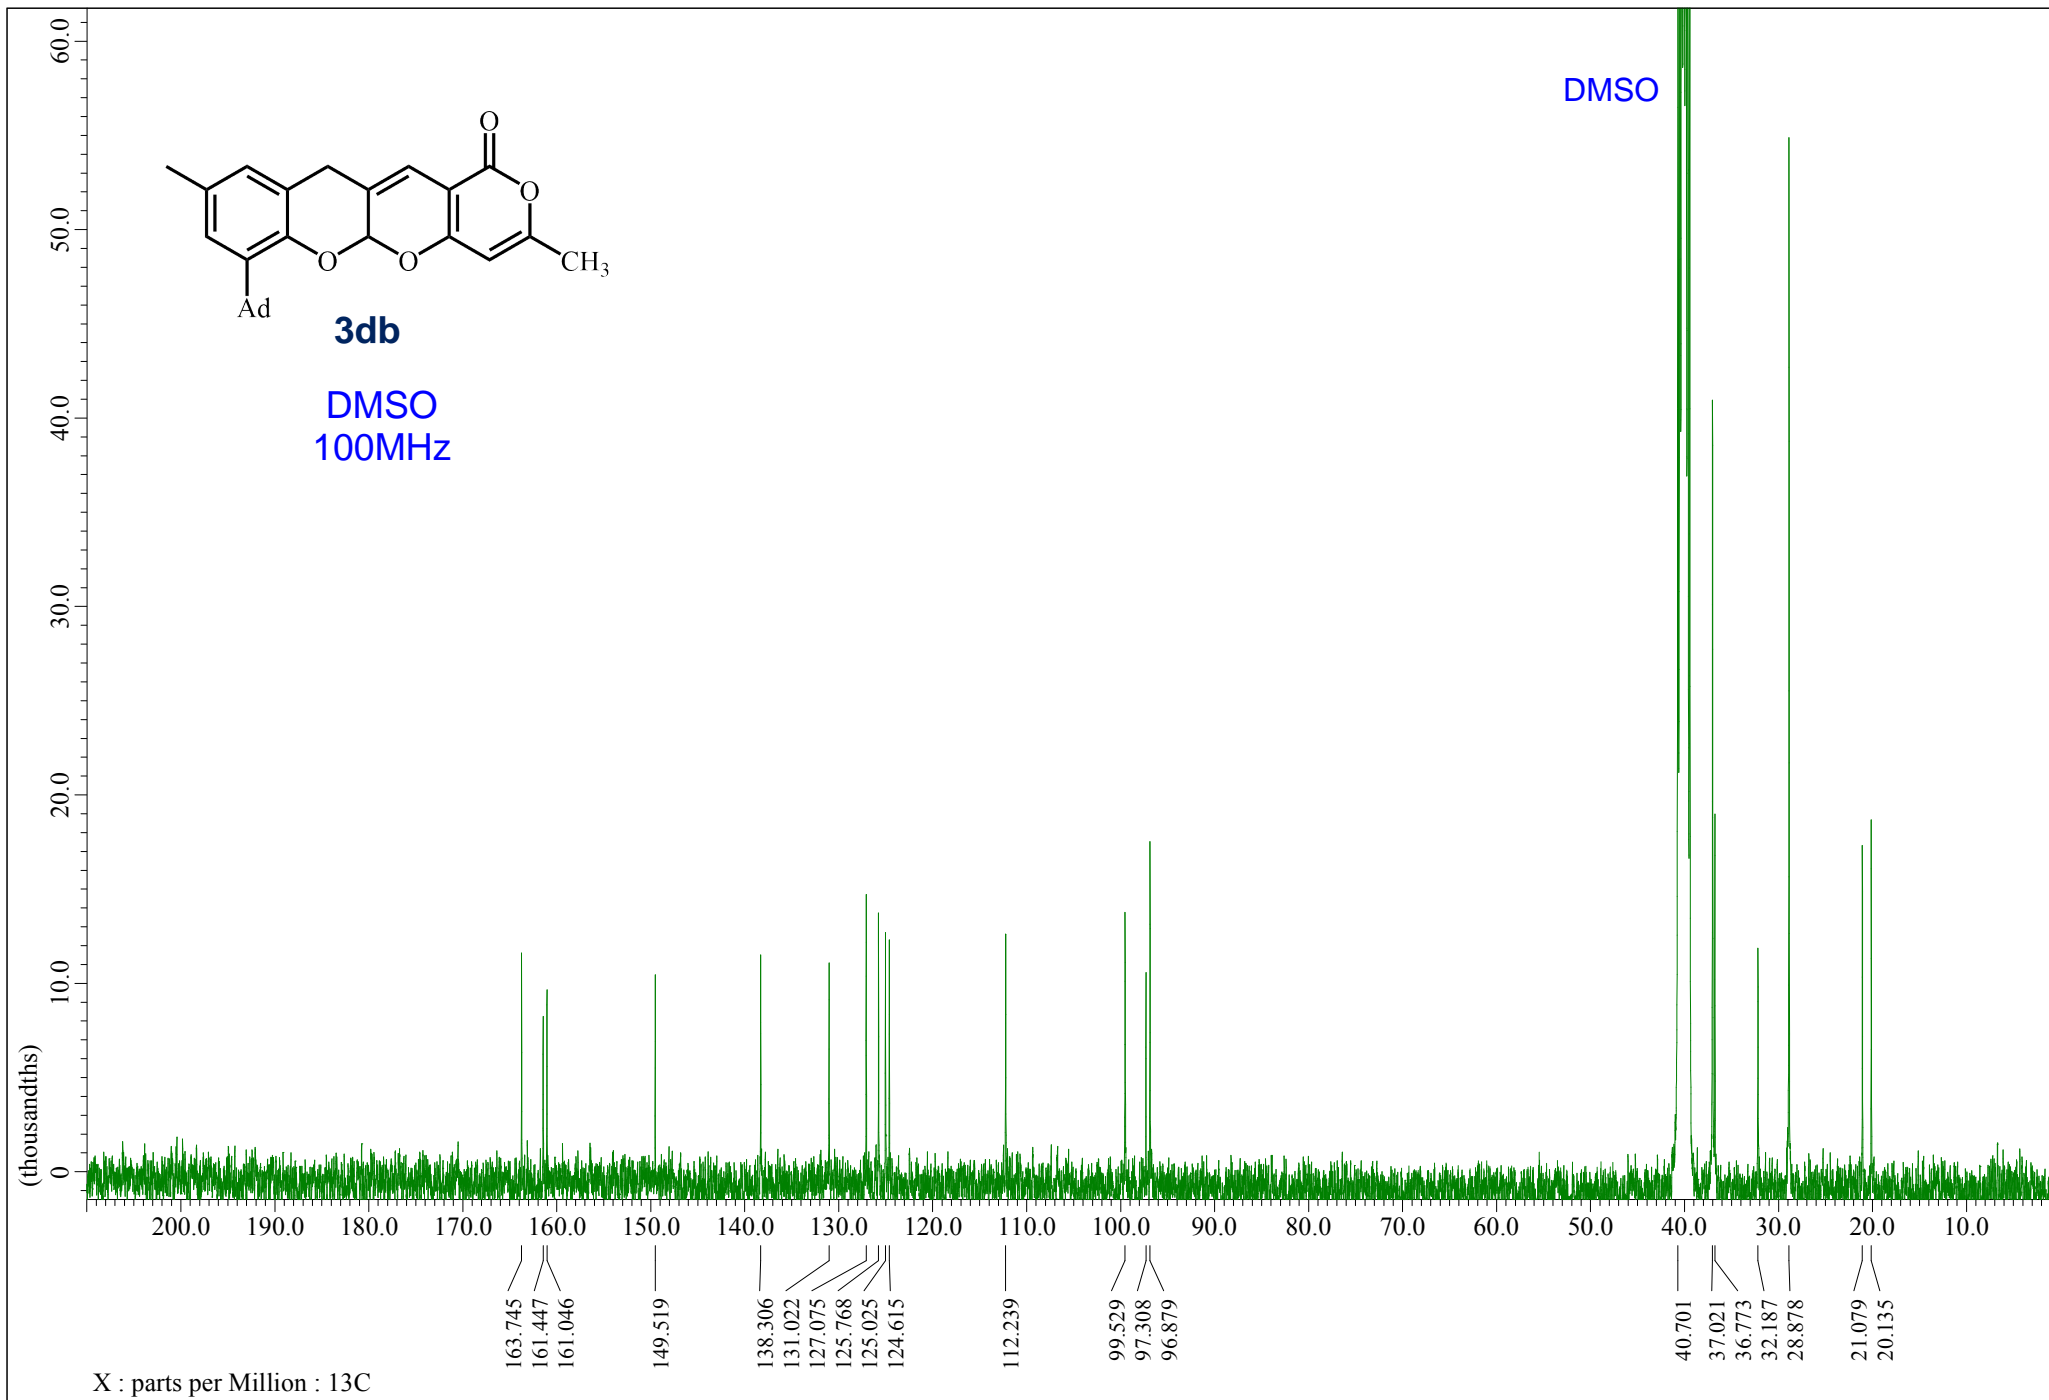

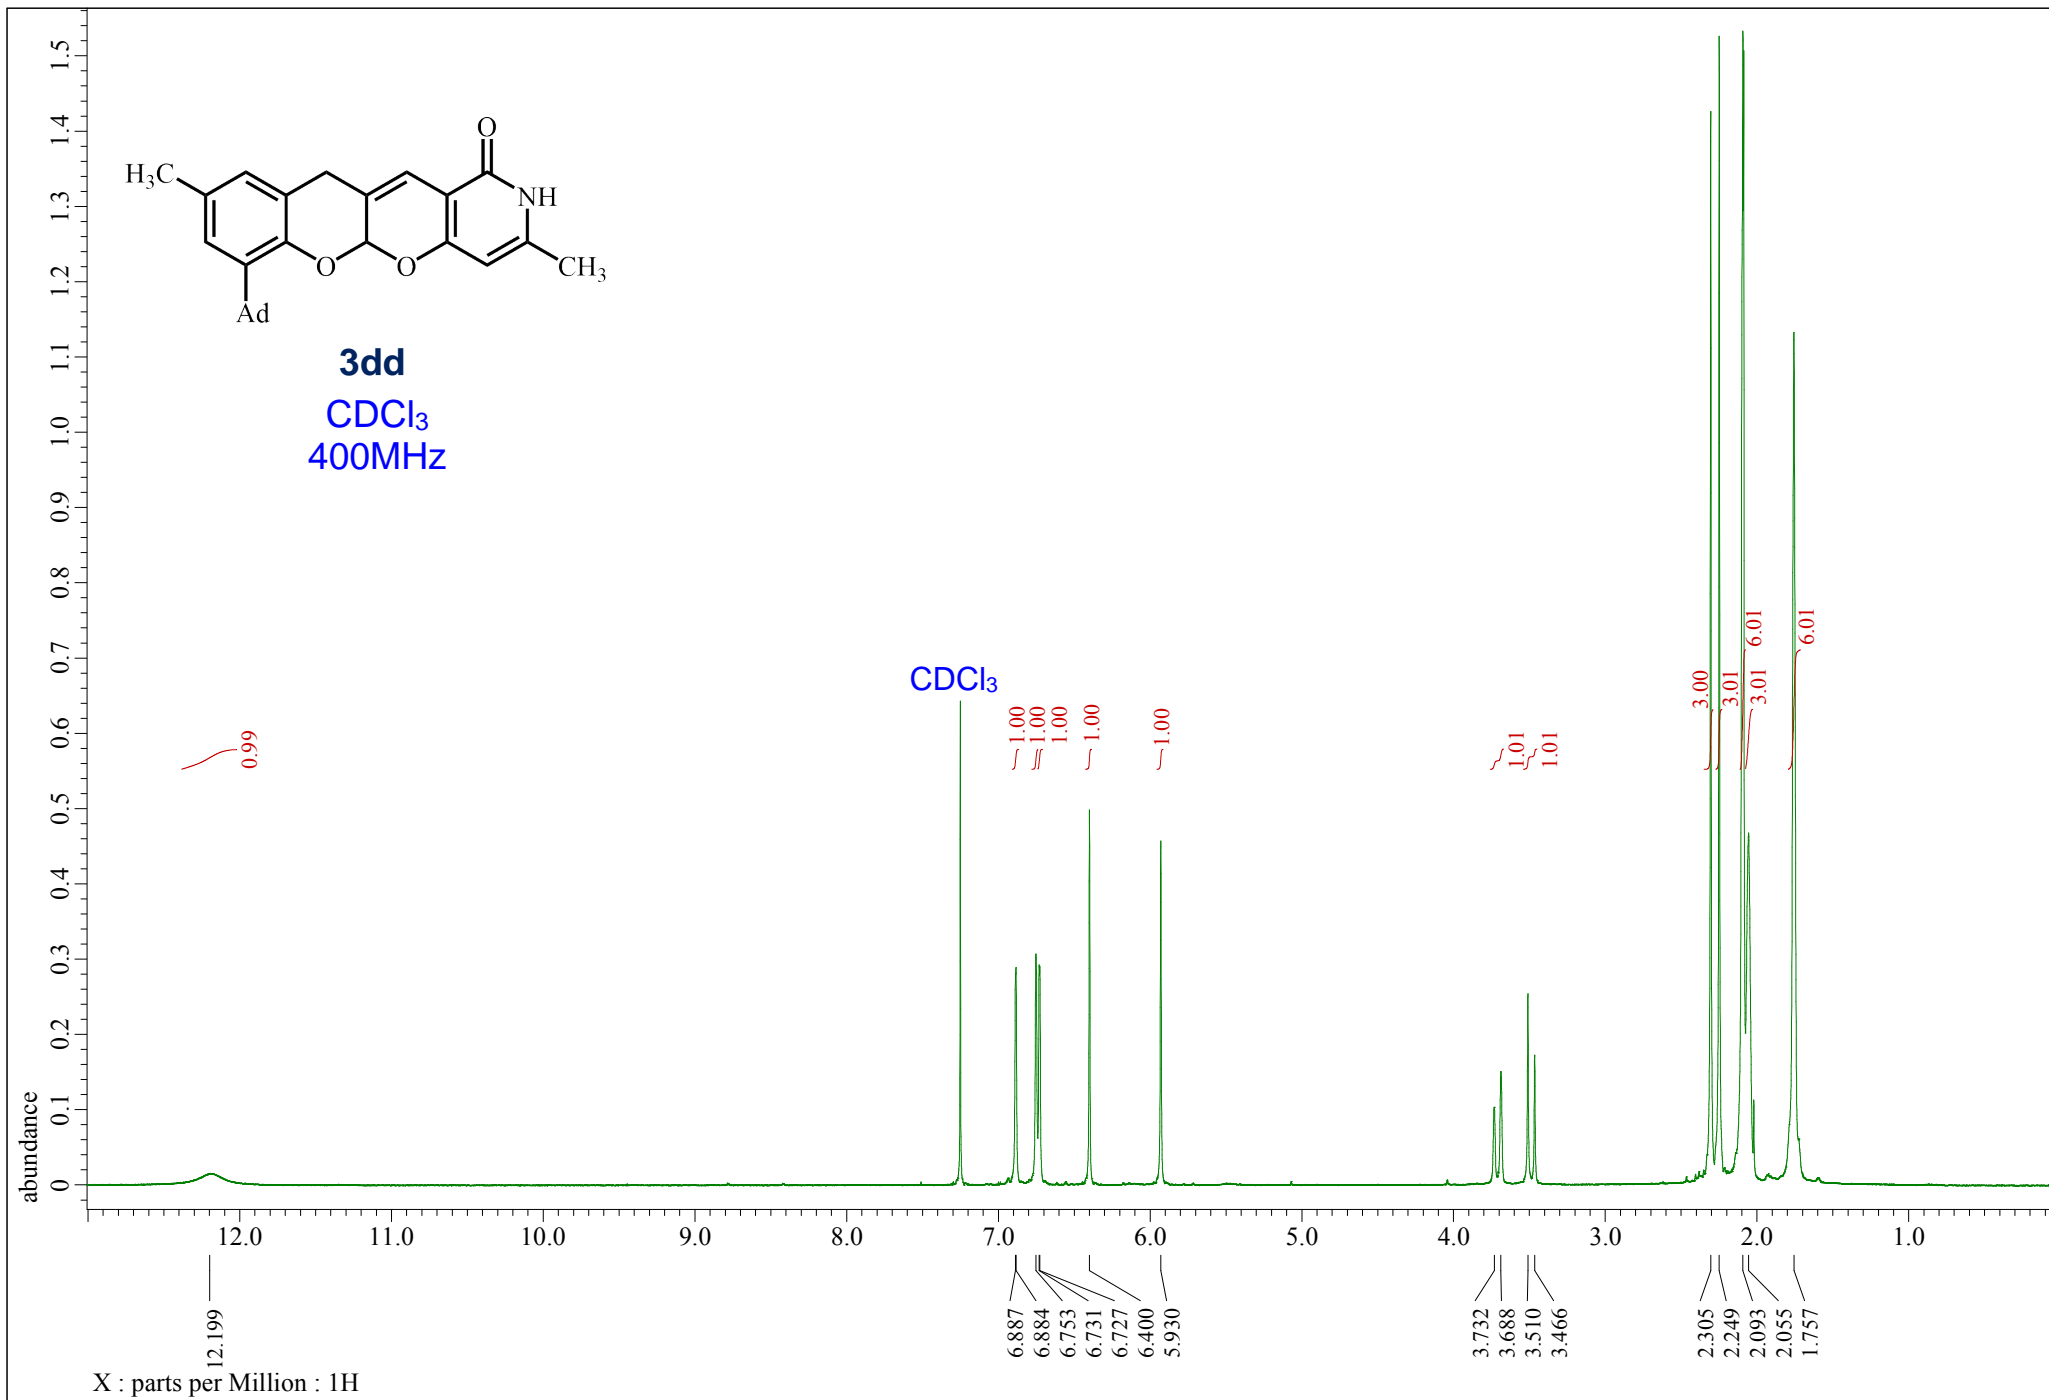

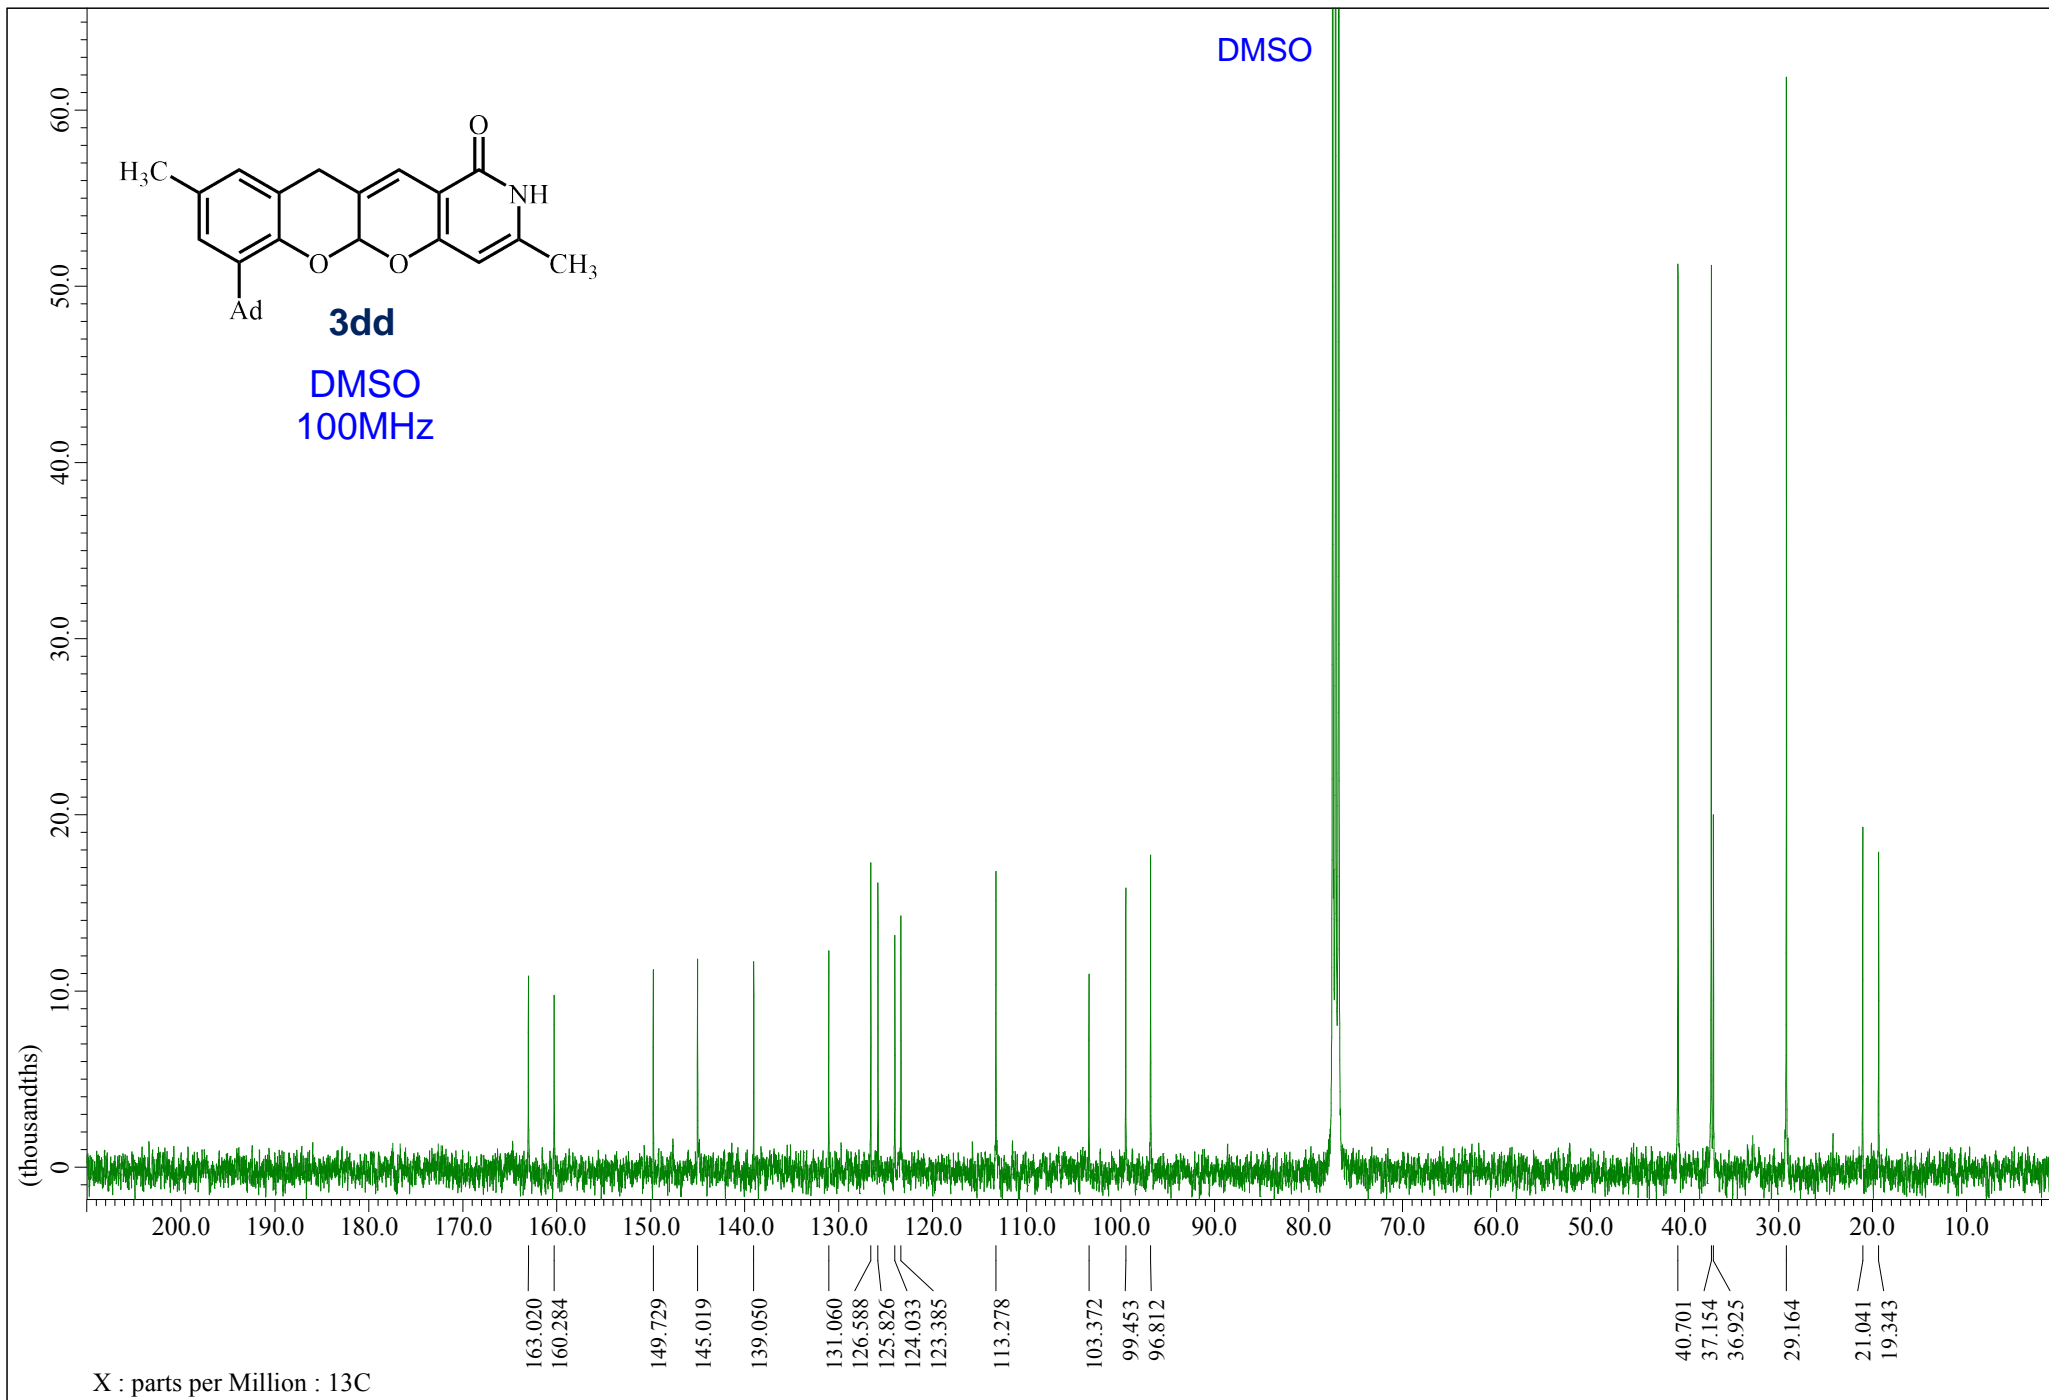

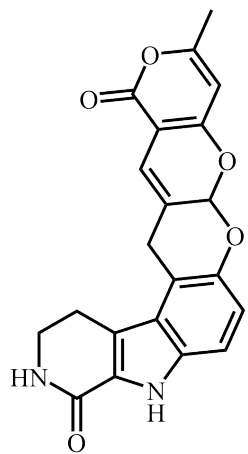

**3eb**

DMSO  
400MHz

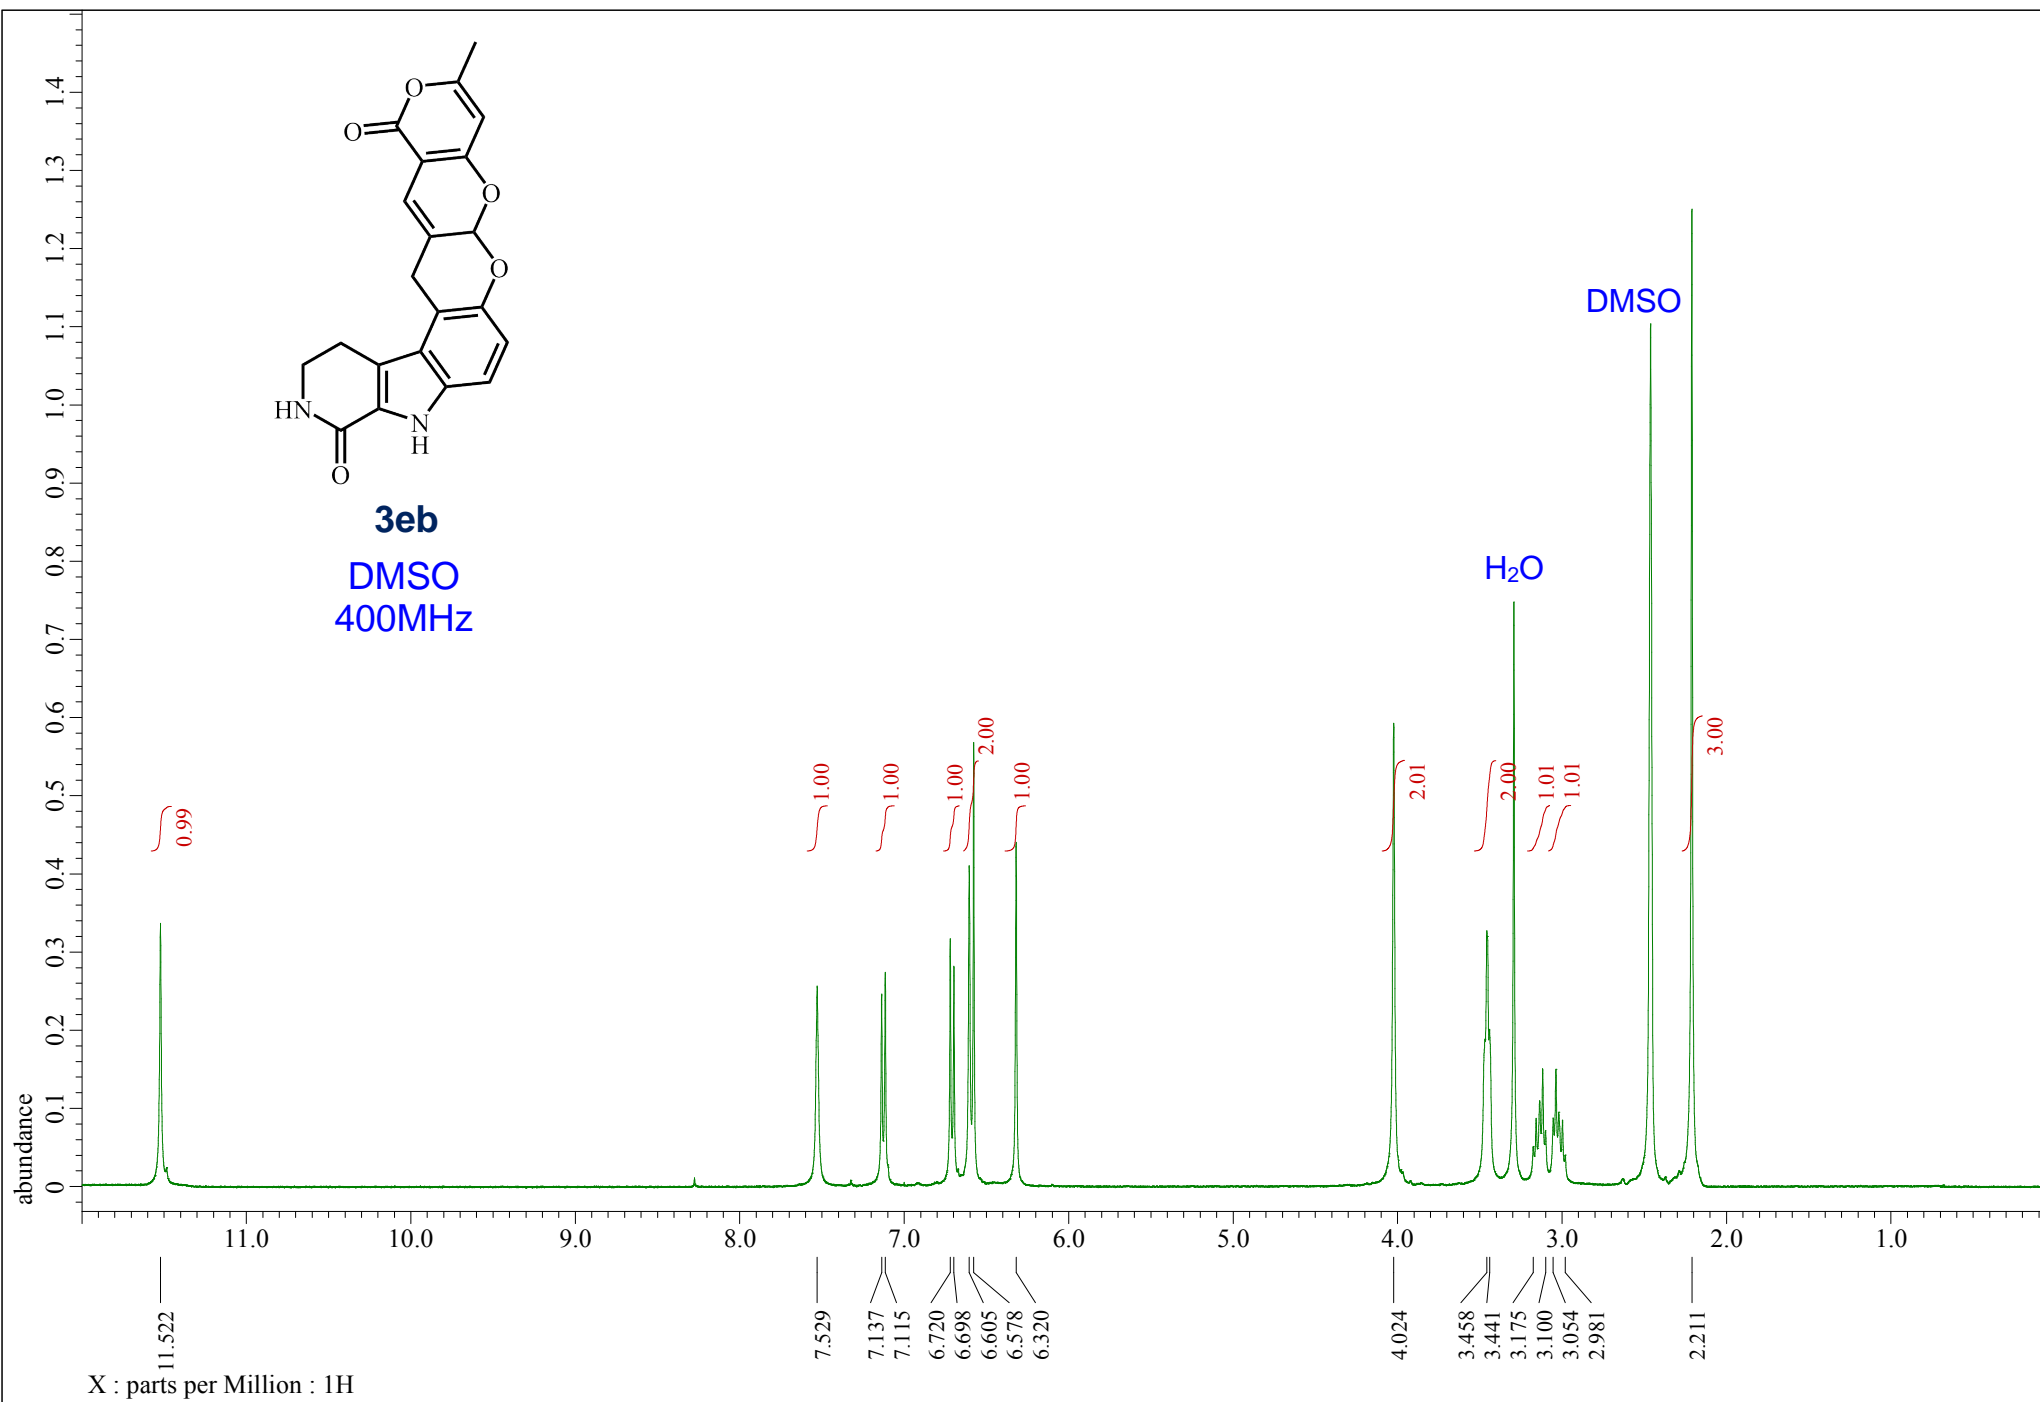

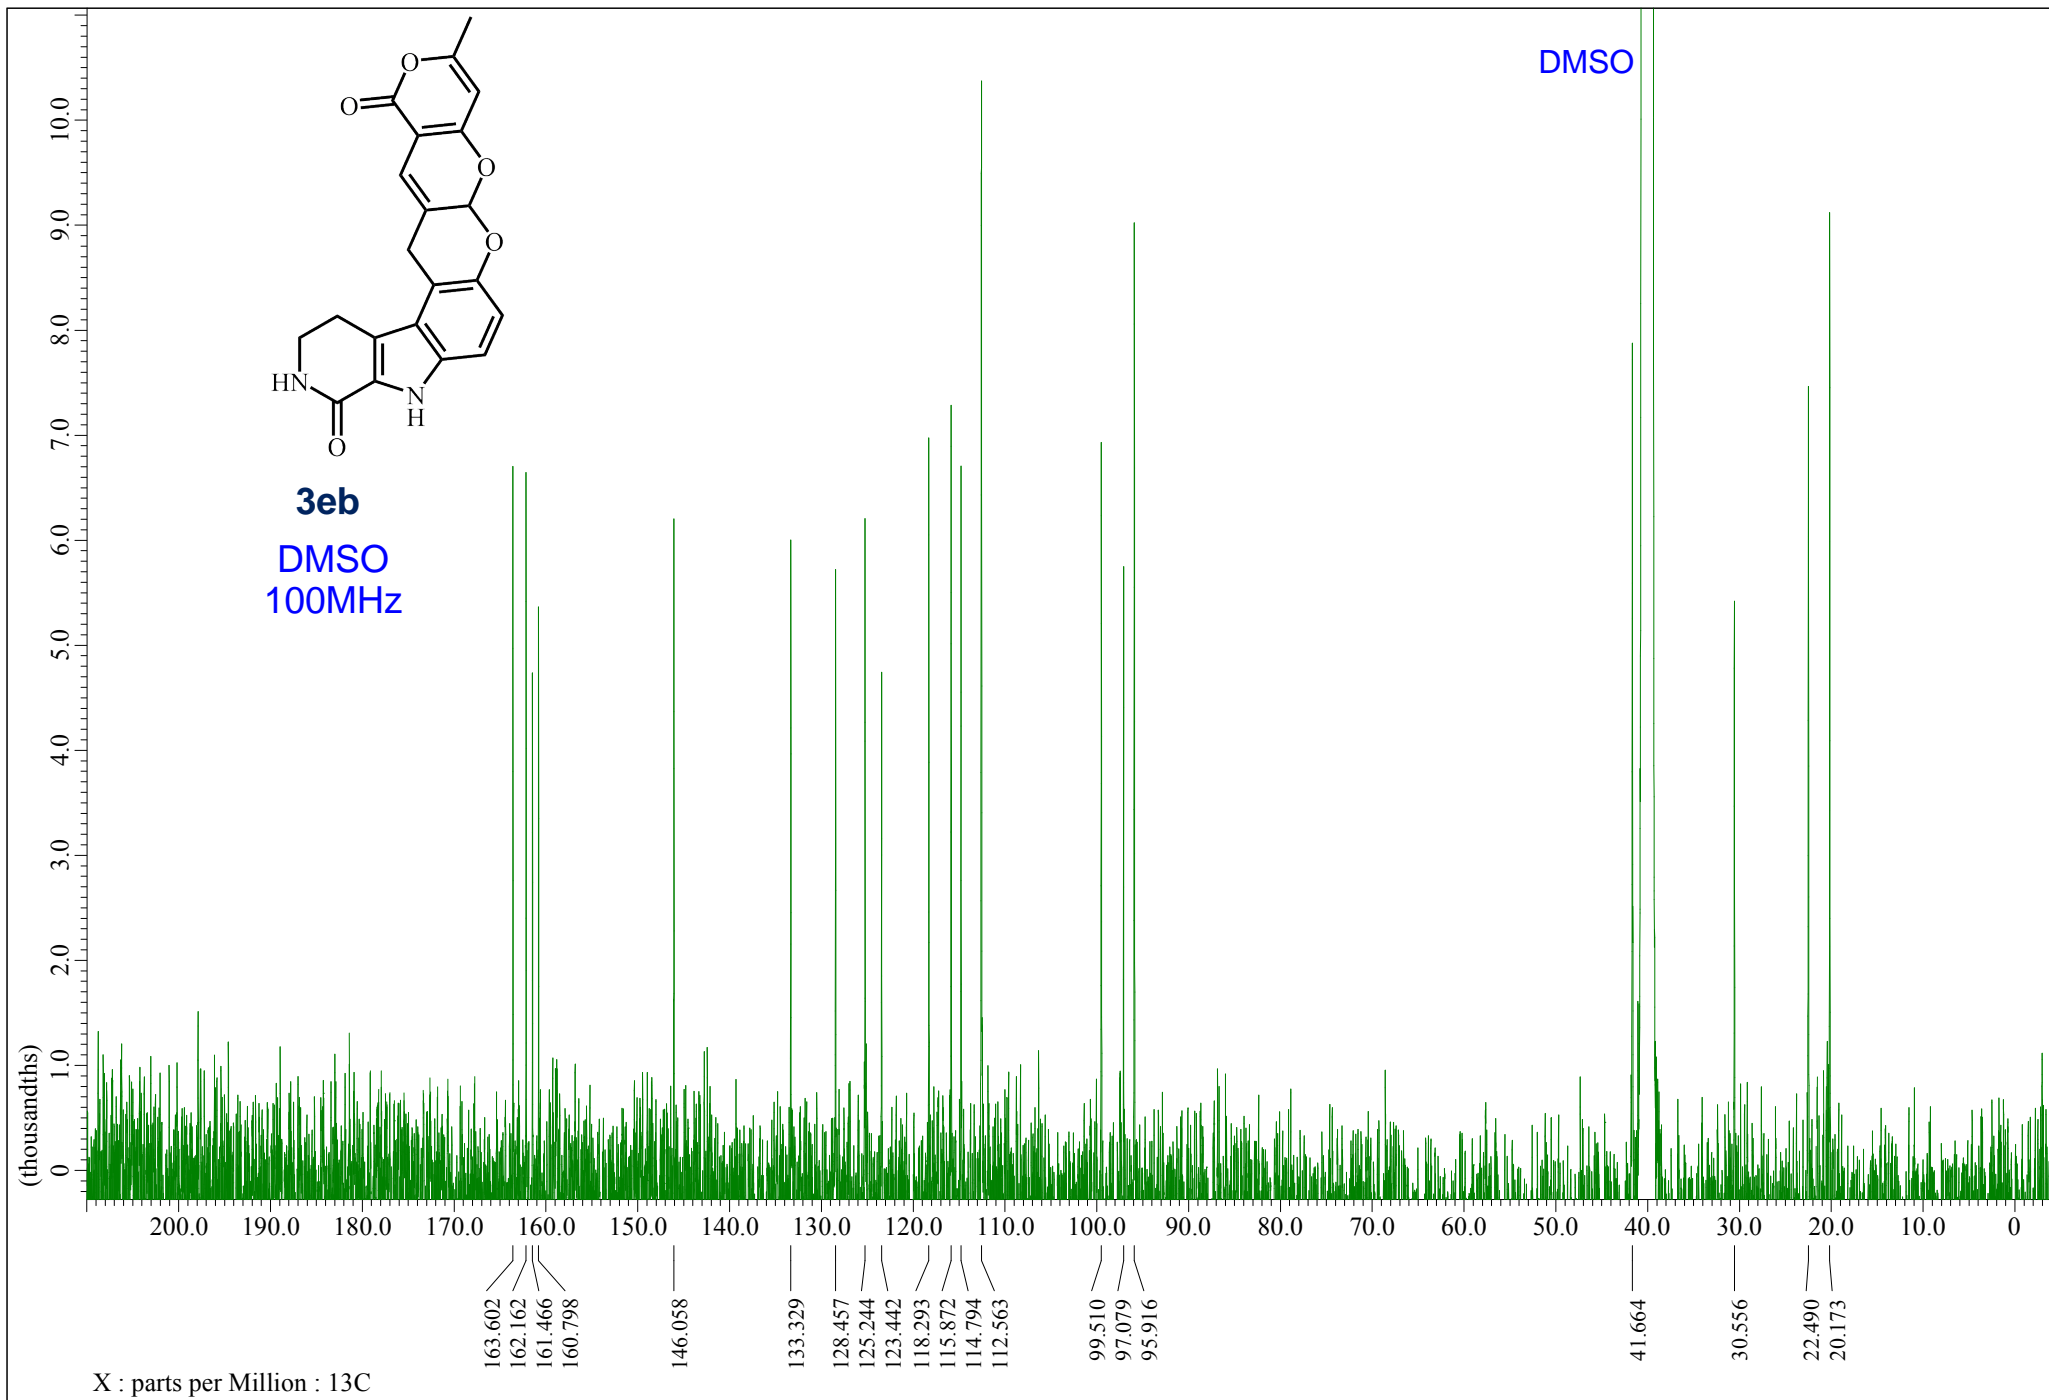

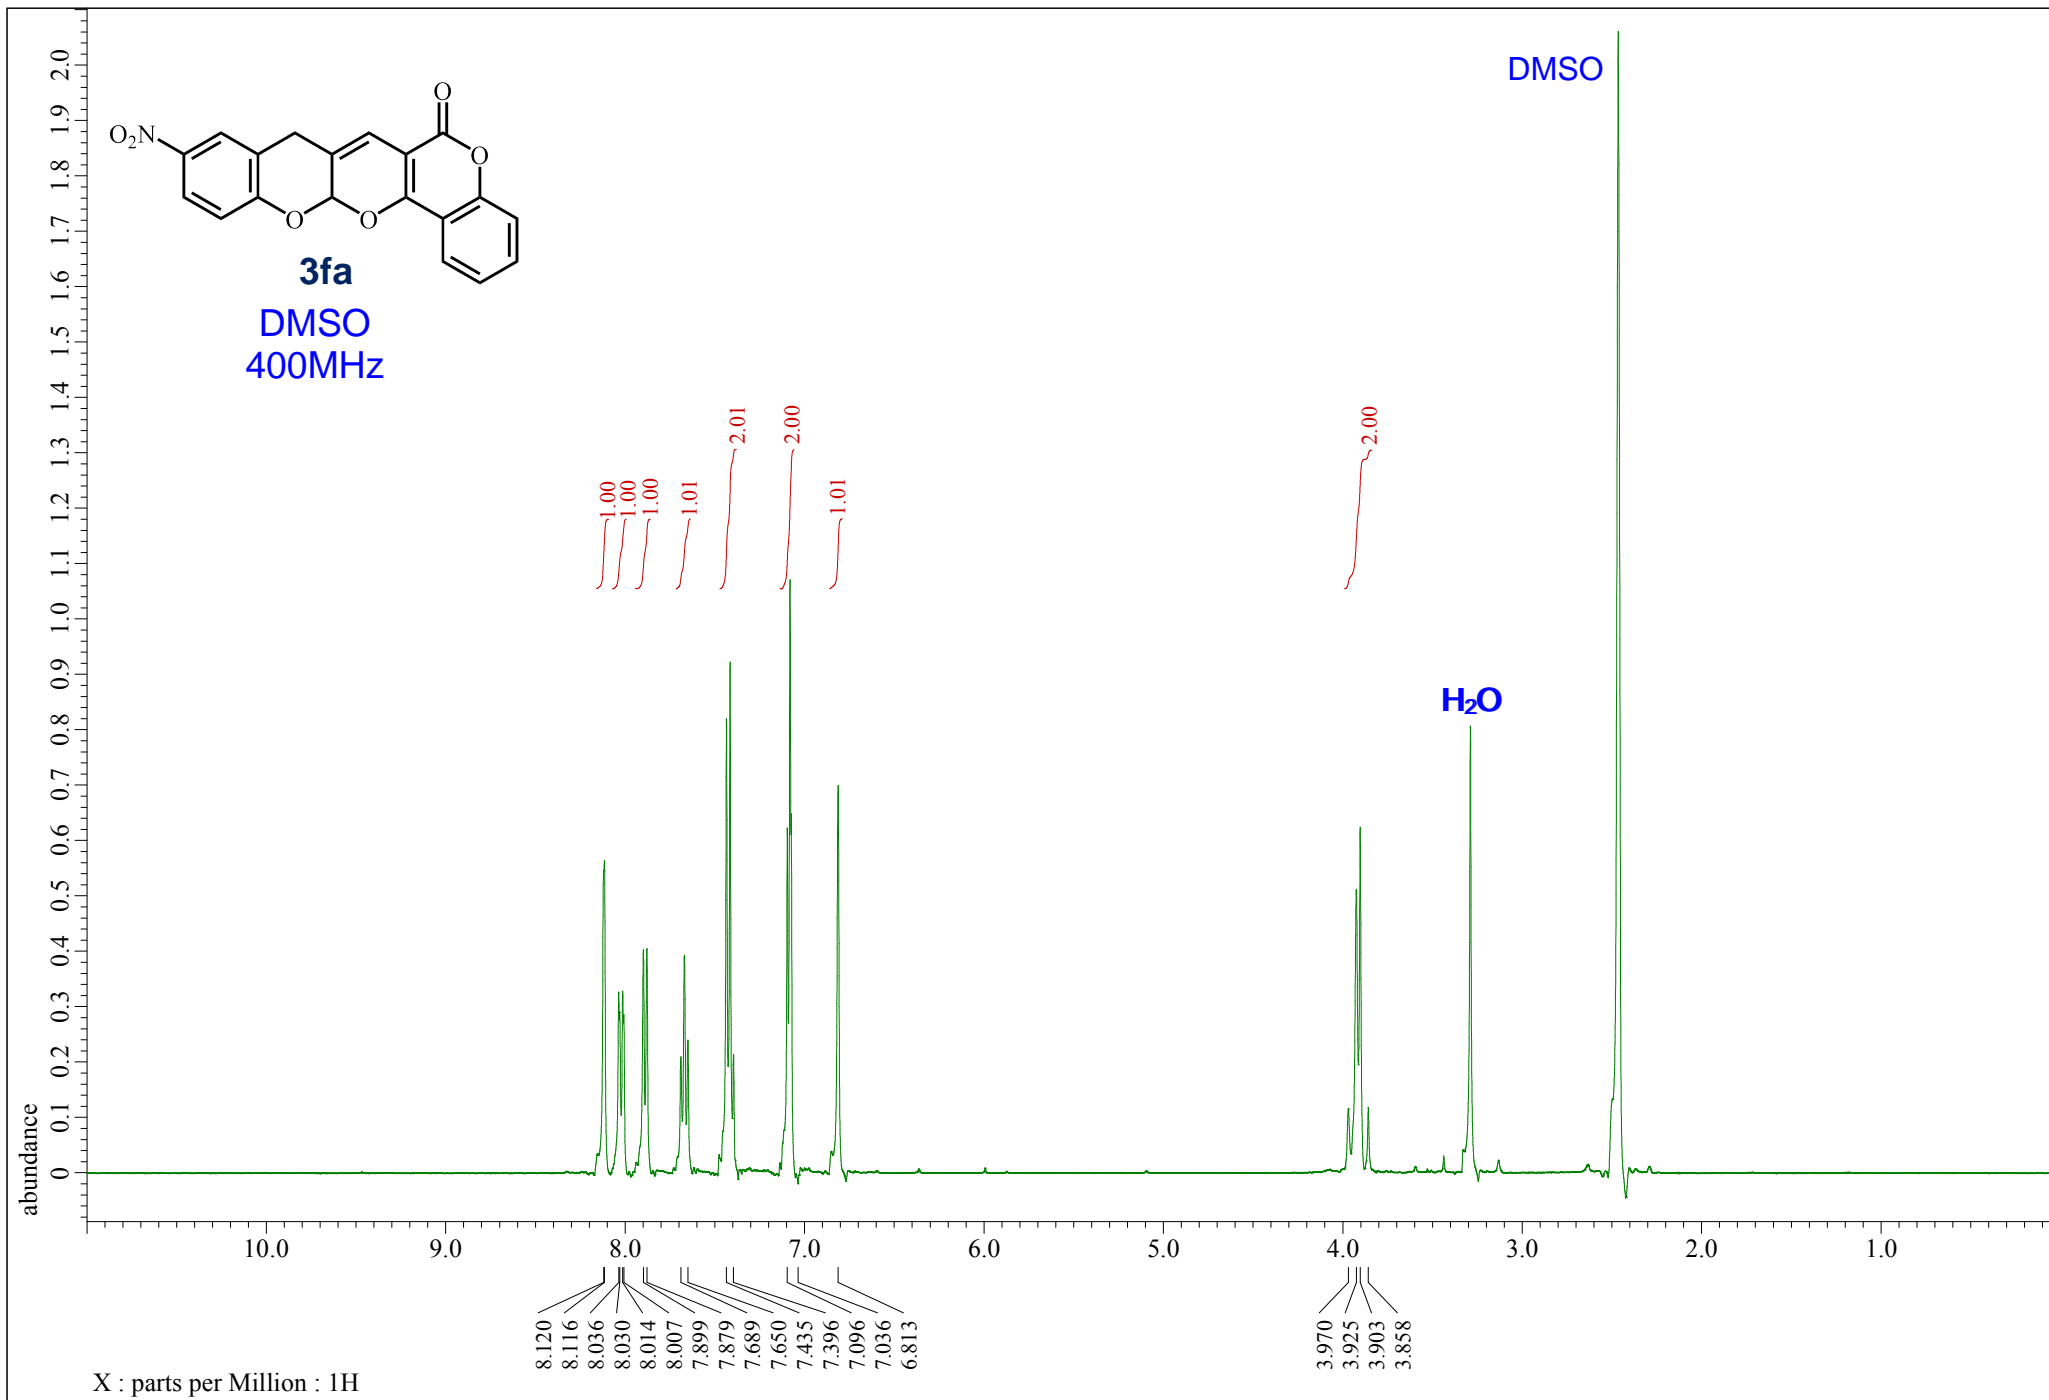

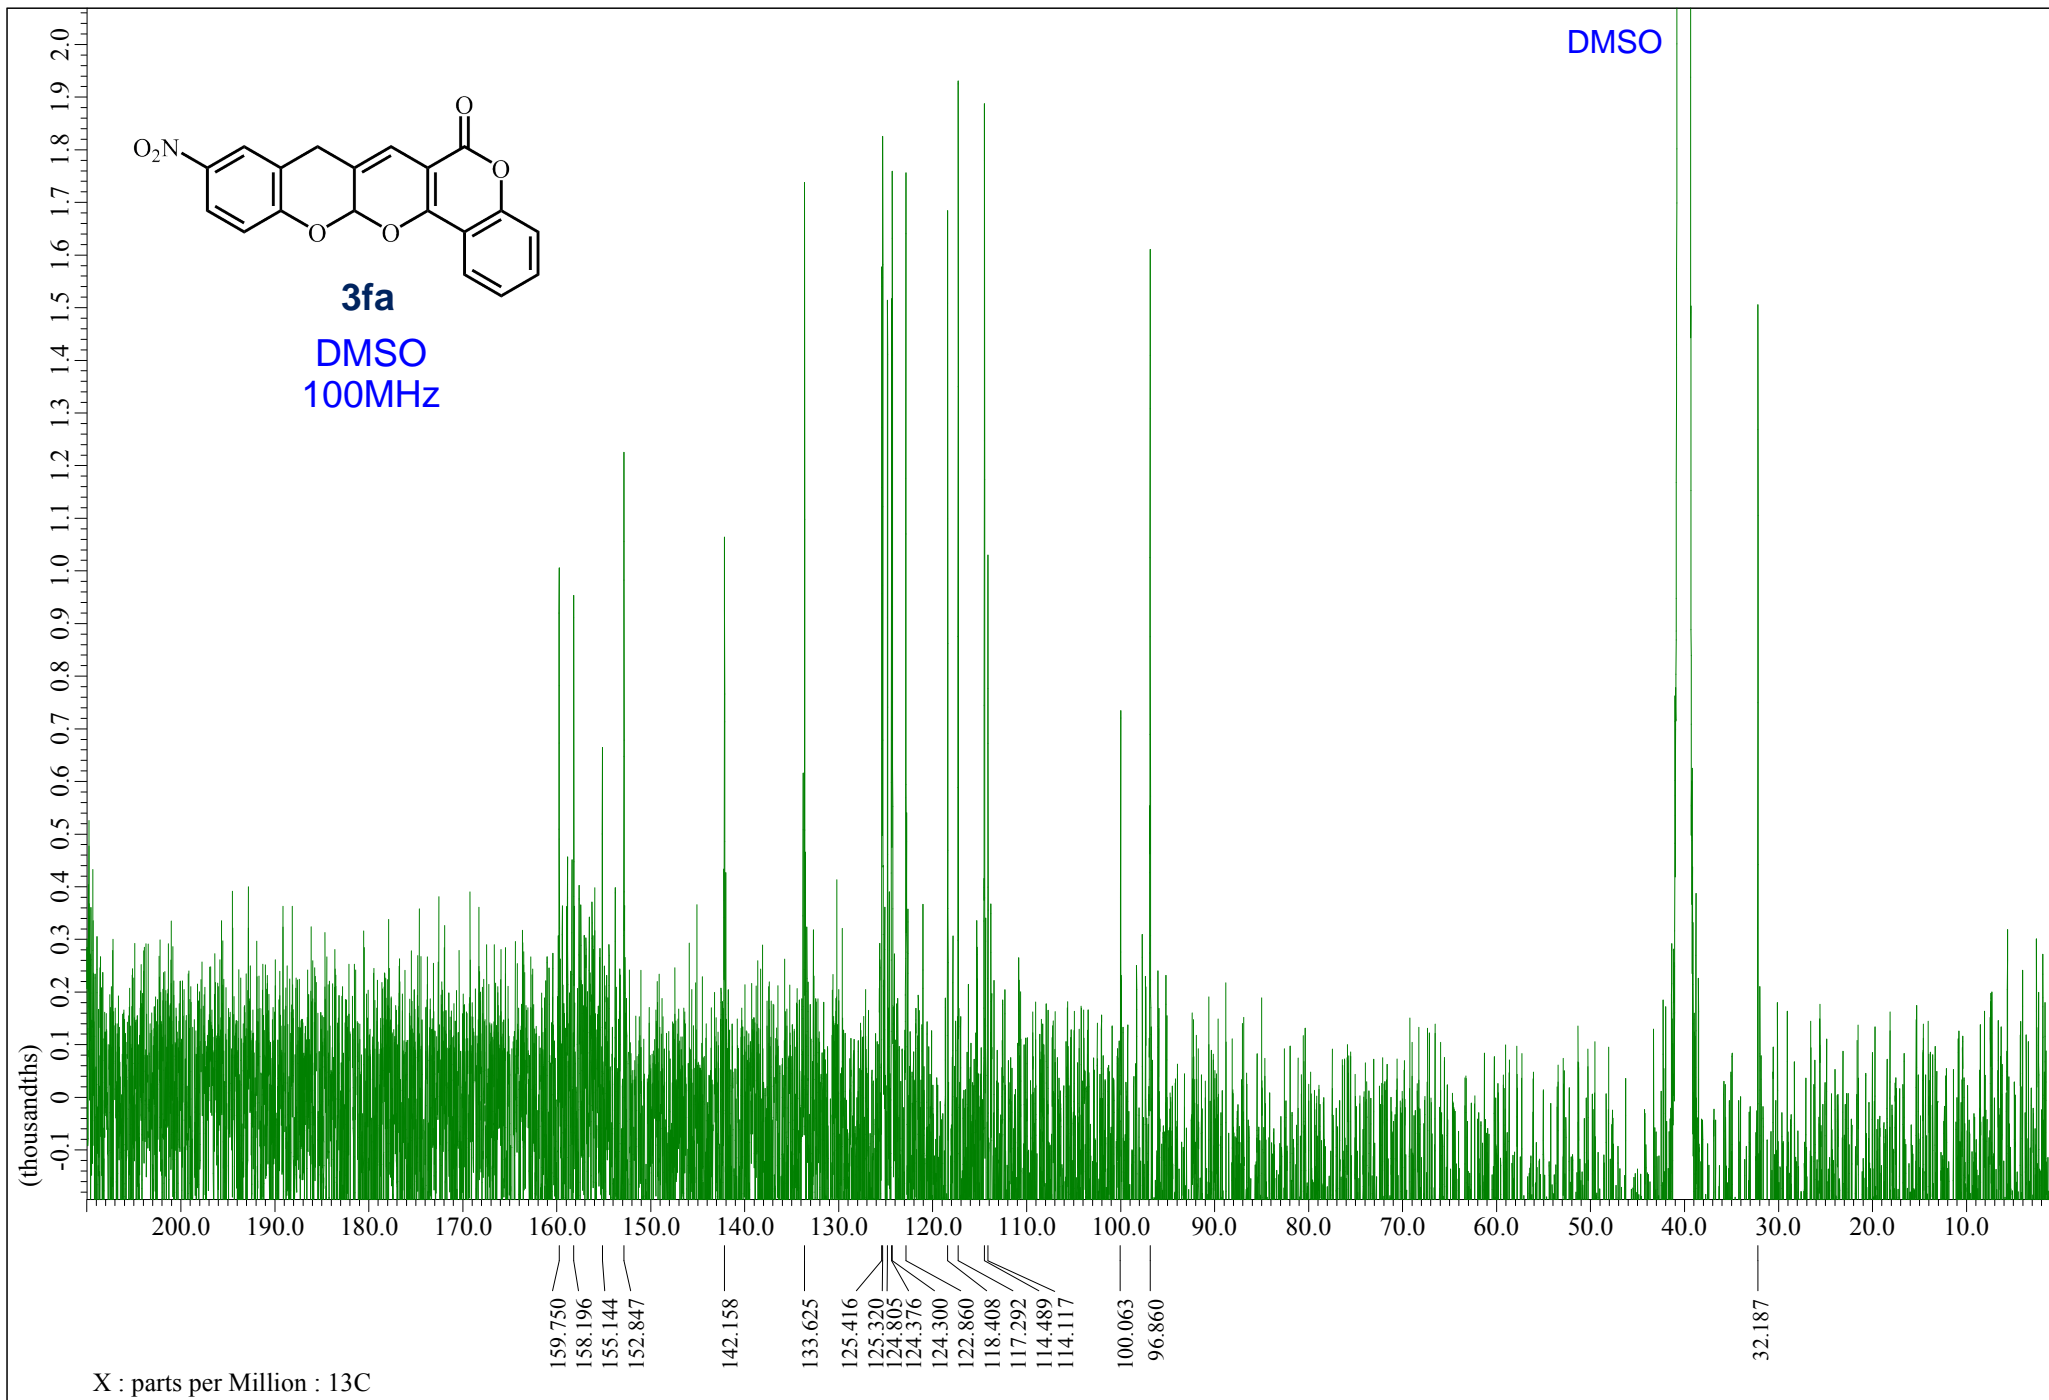



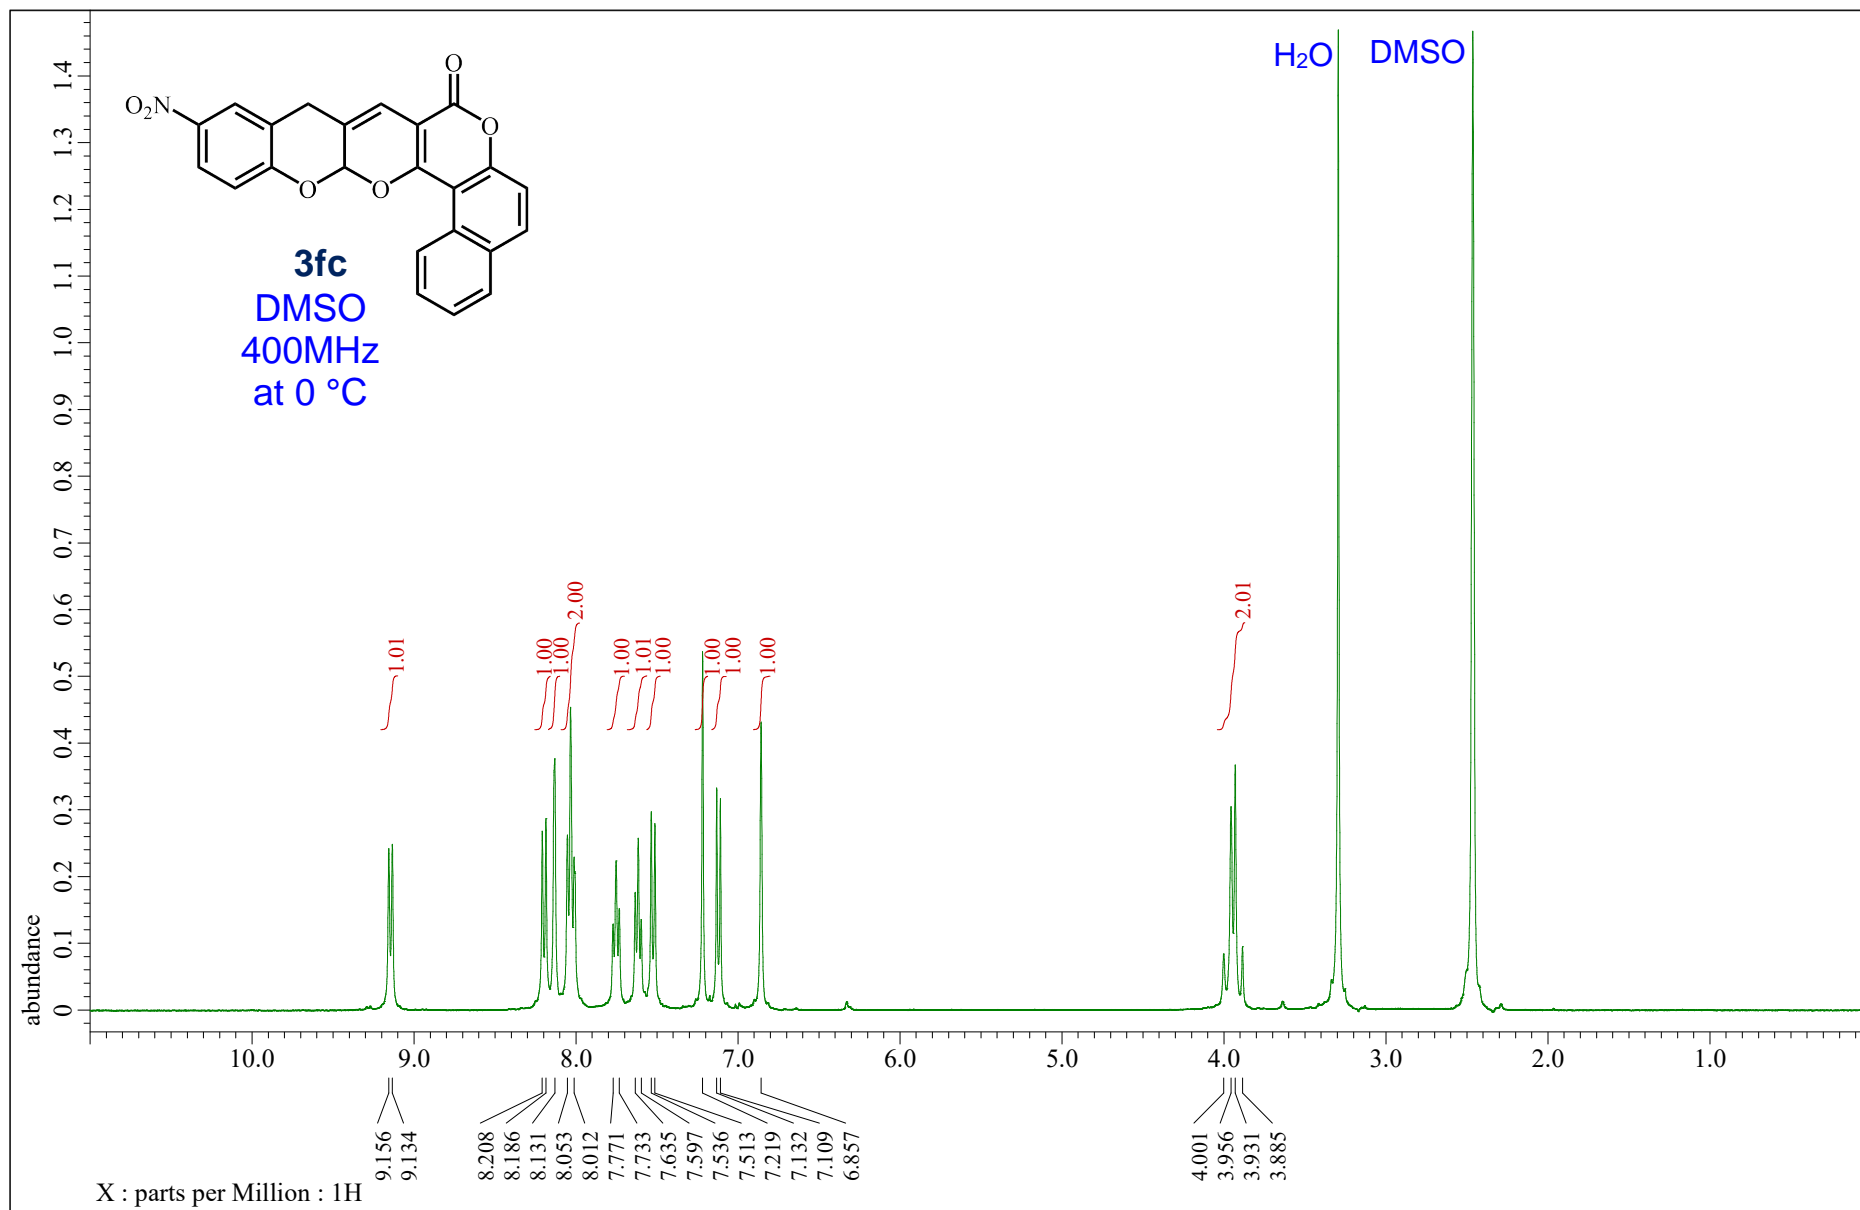

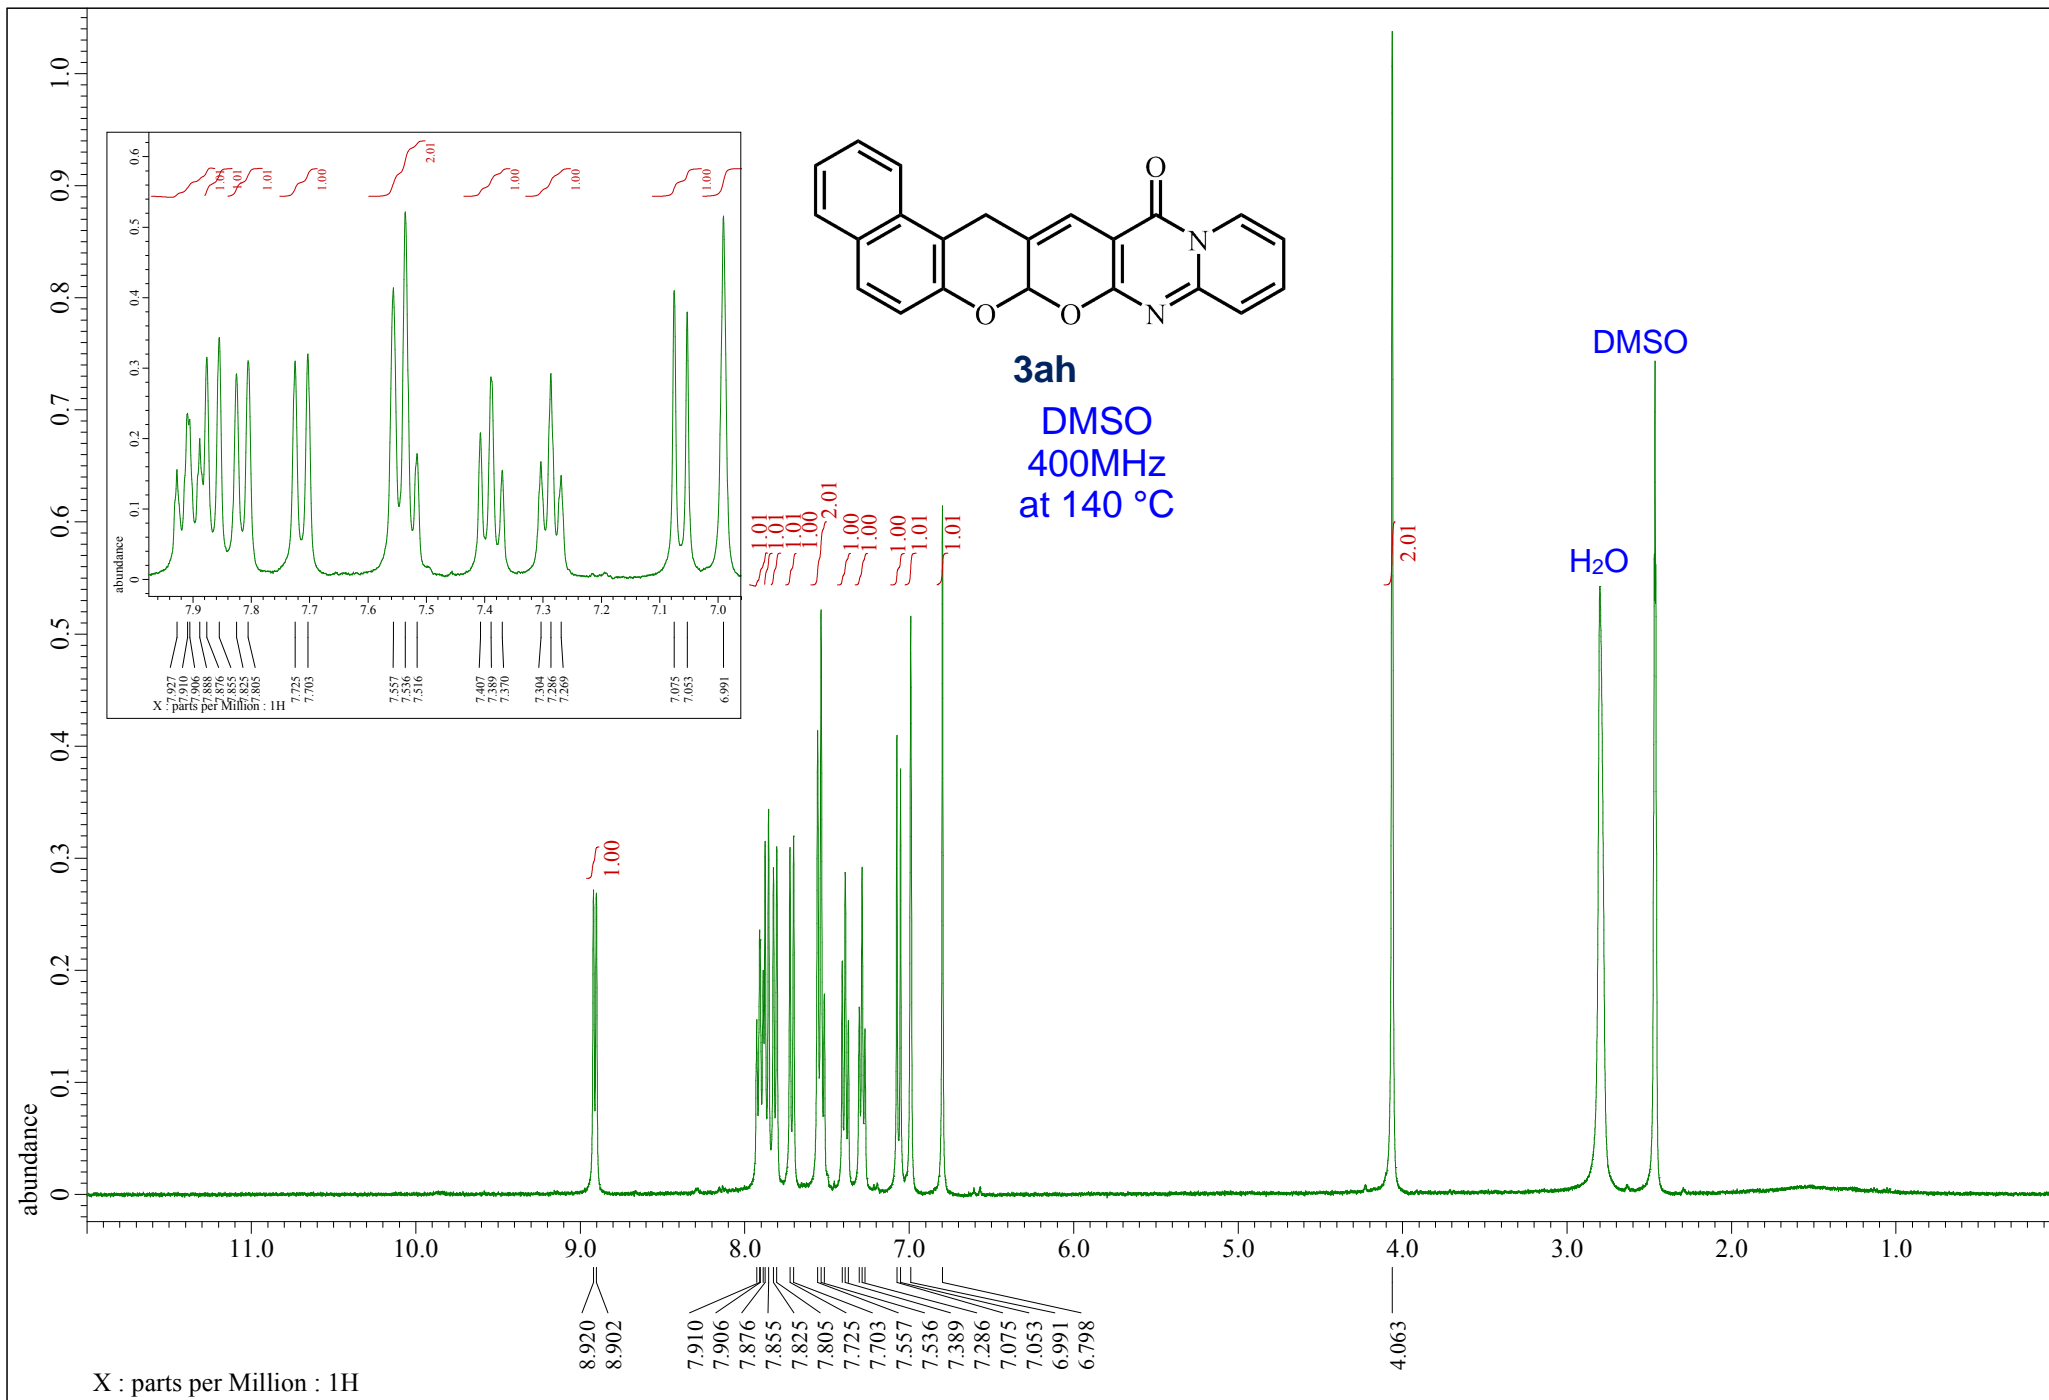

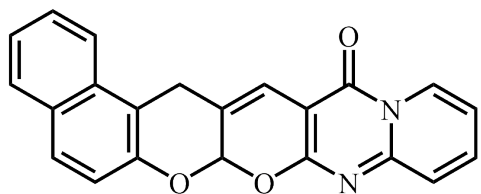

**3ah**

DMSO  
100MHz  
at 140 °C

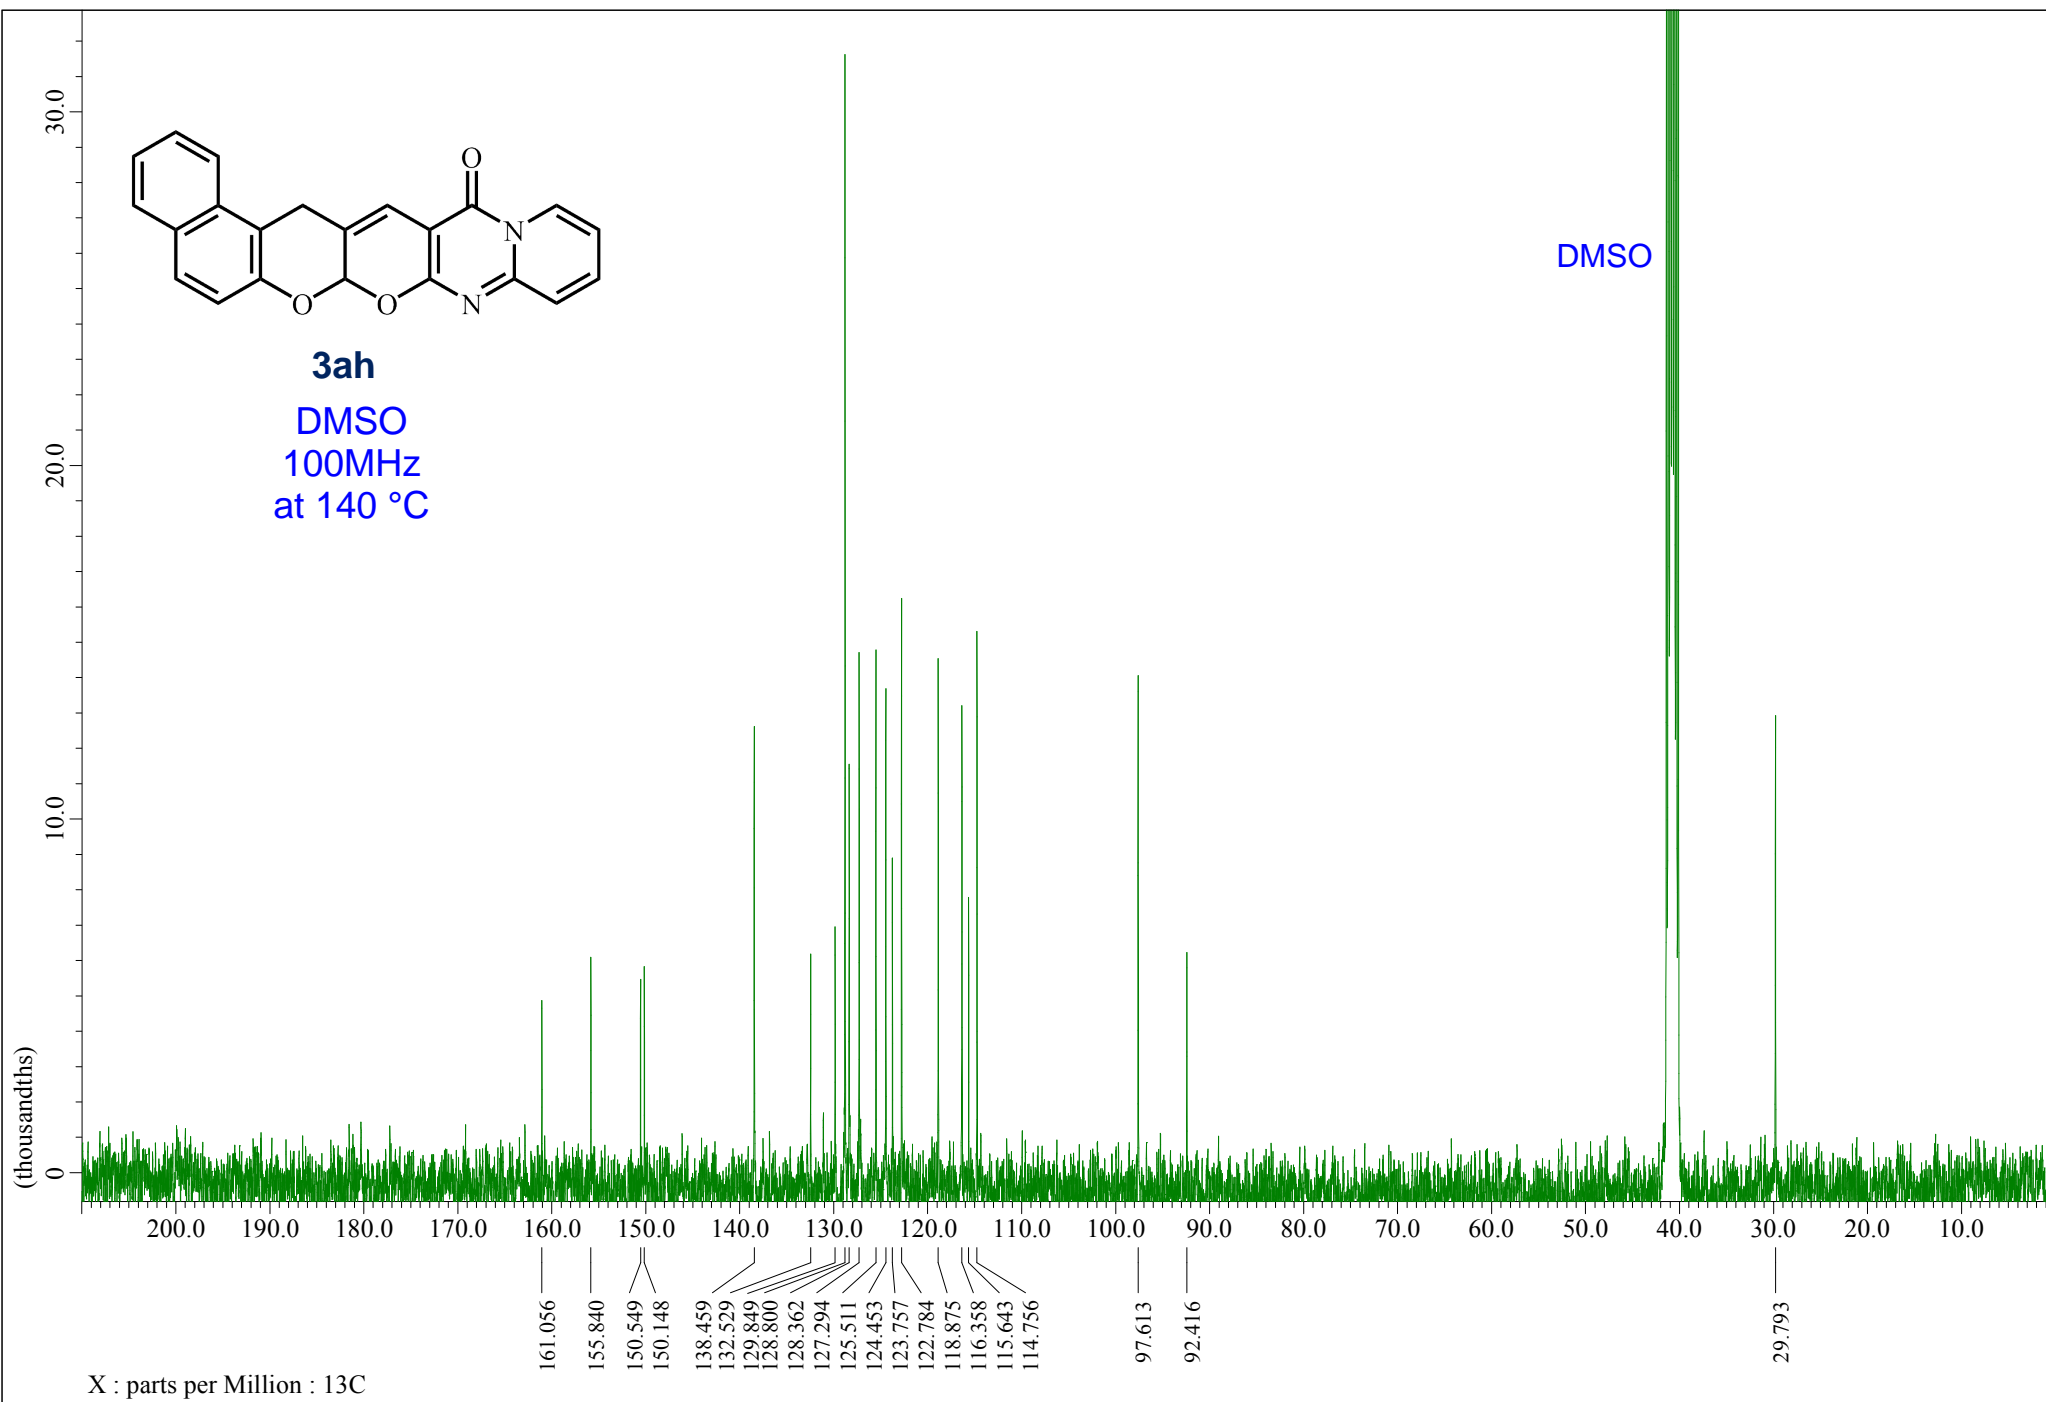

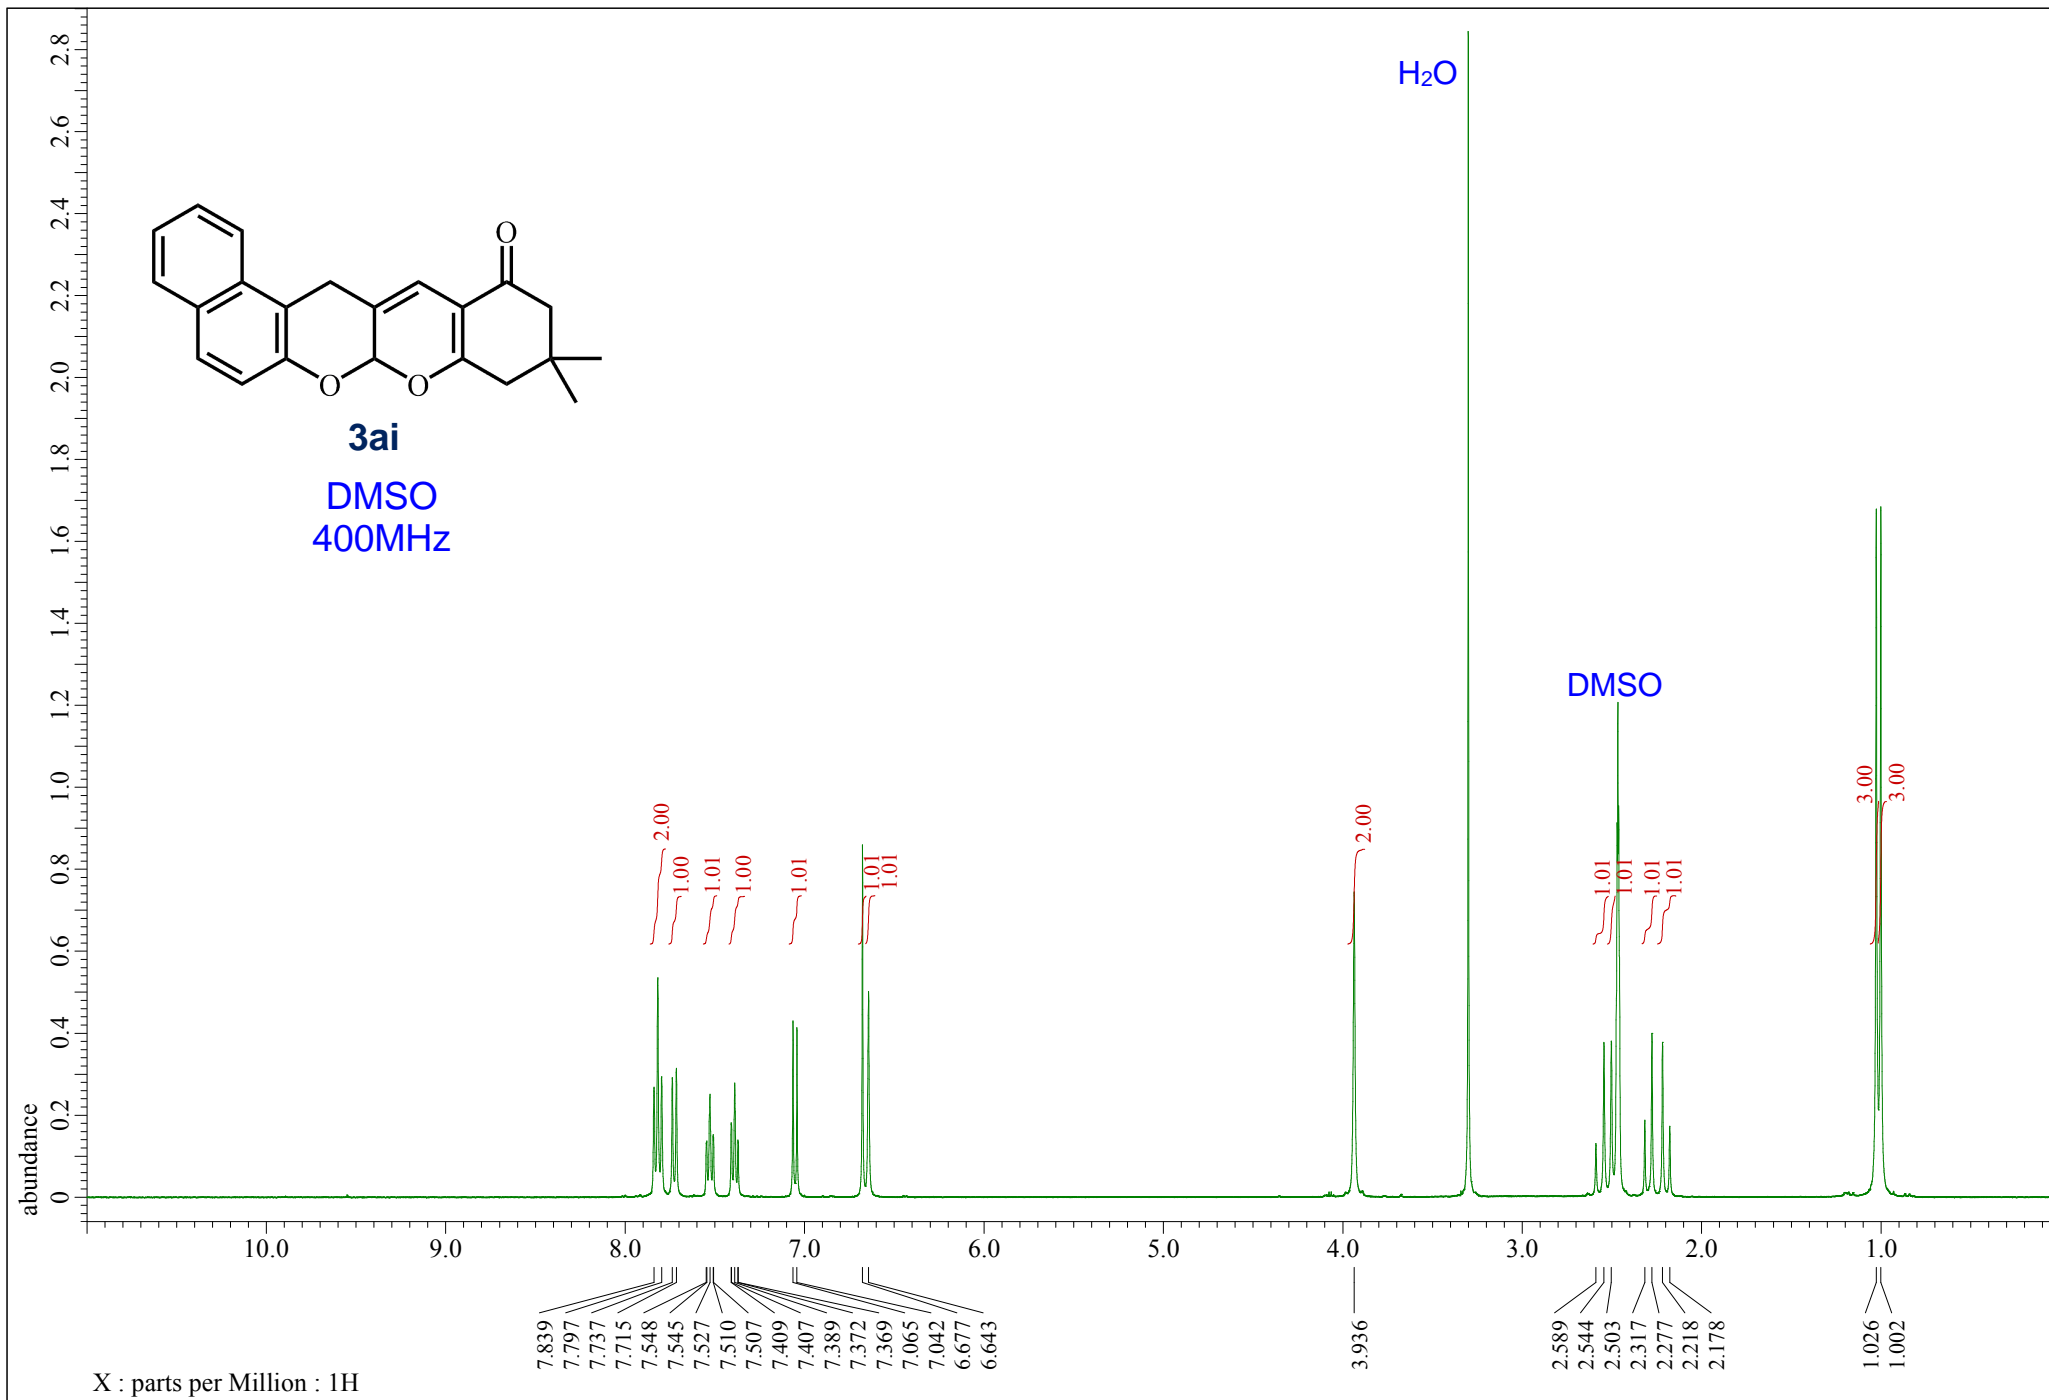

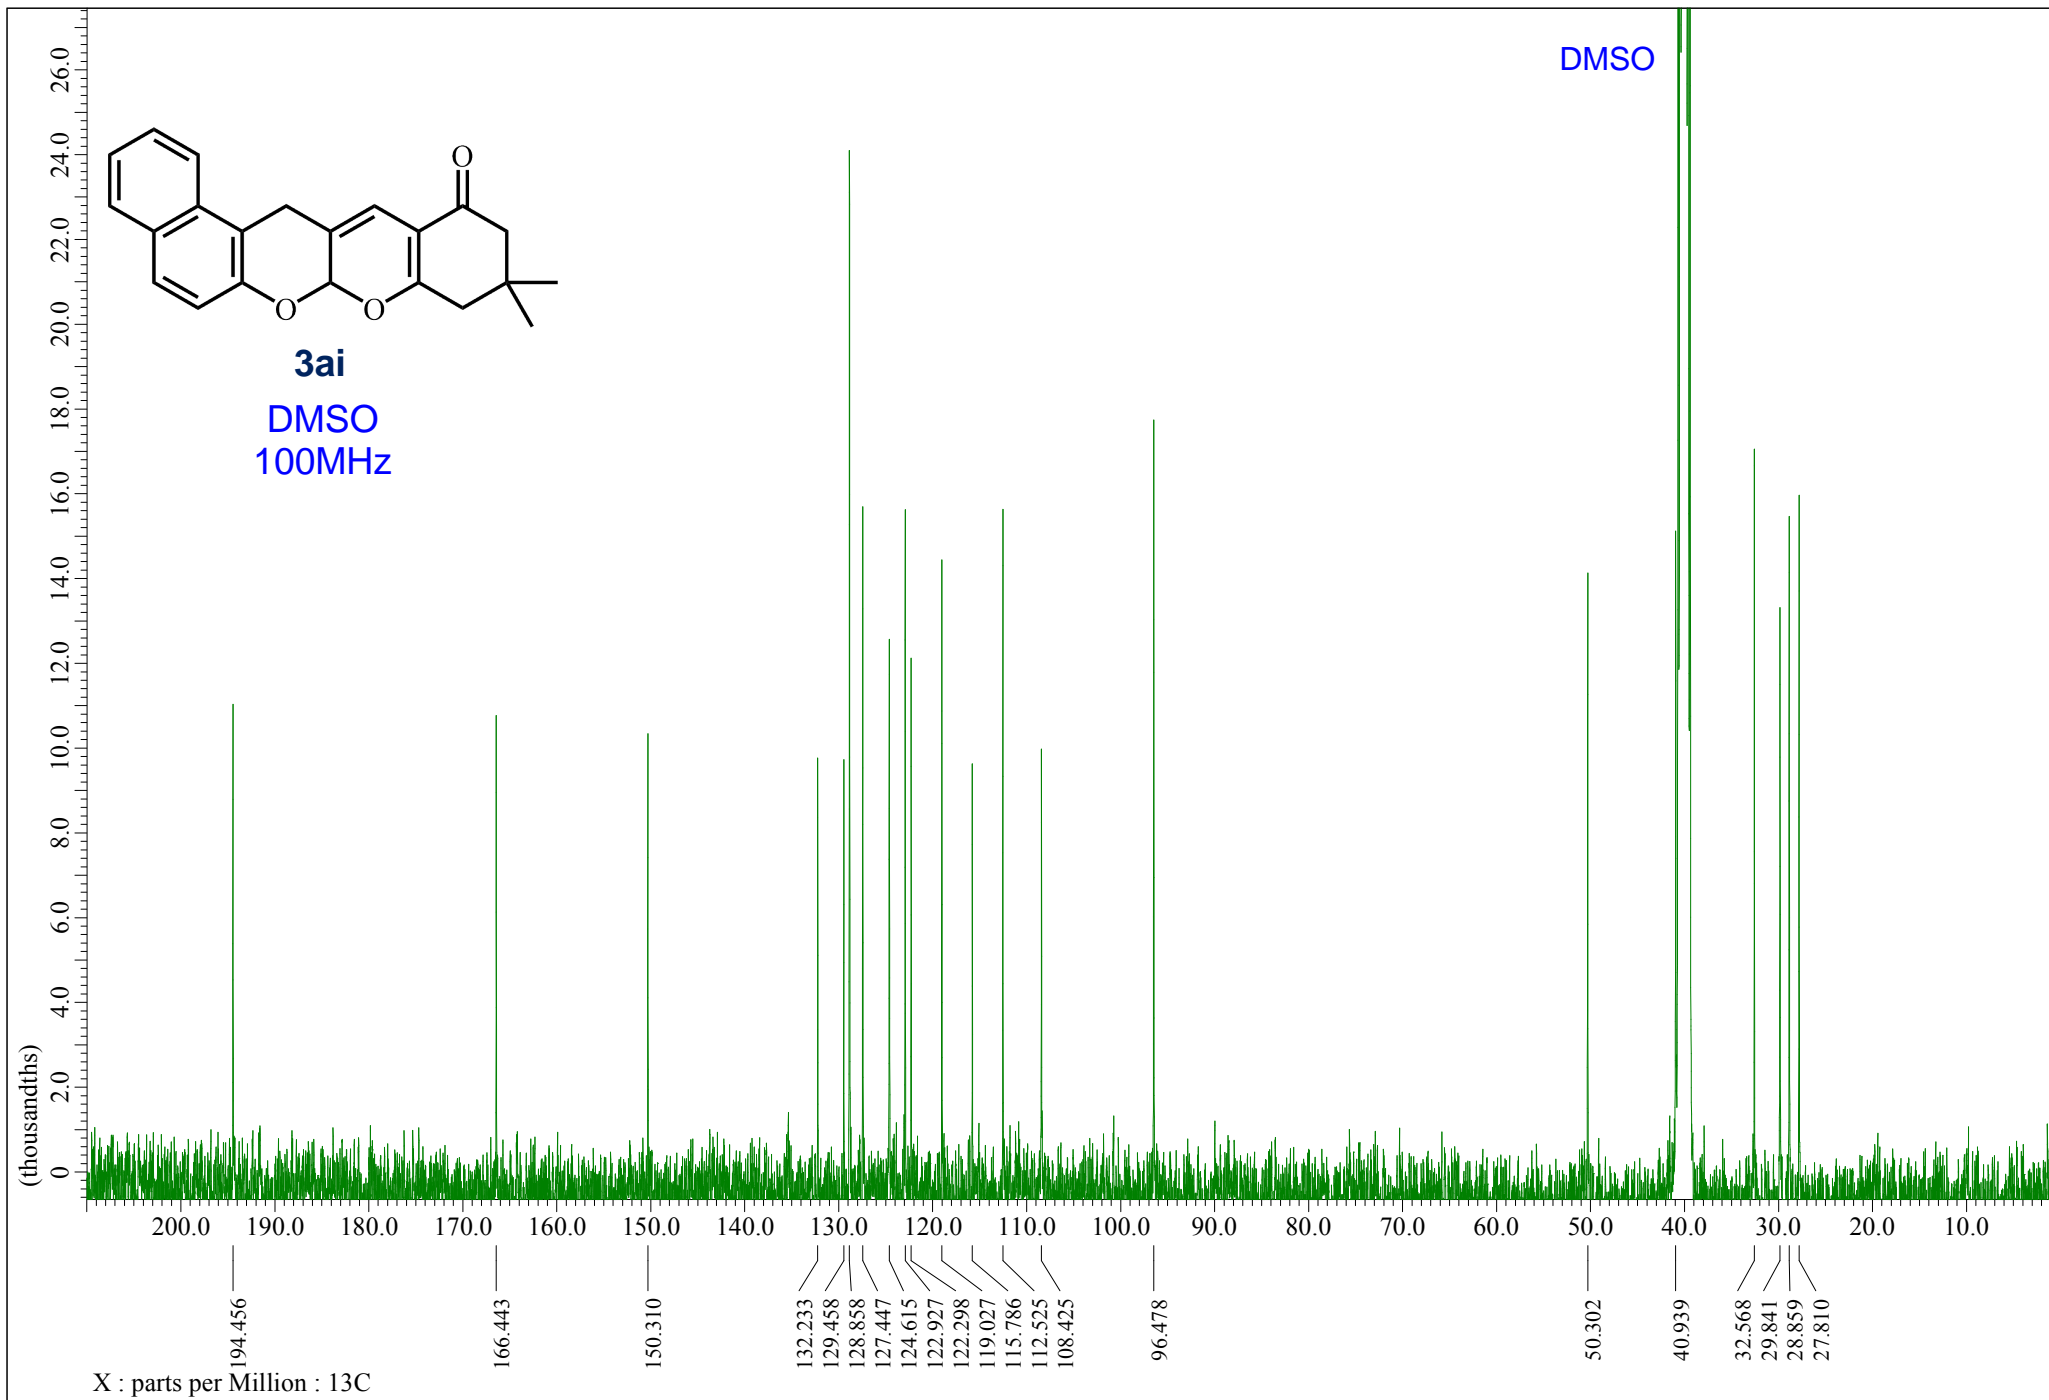

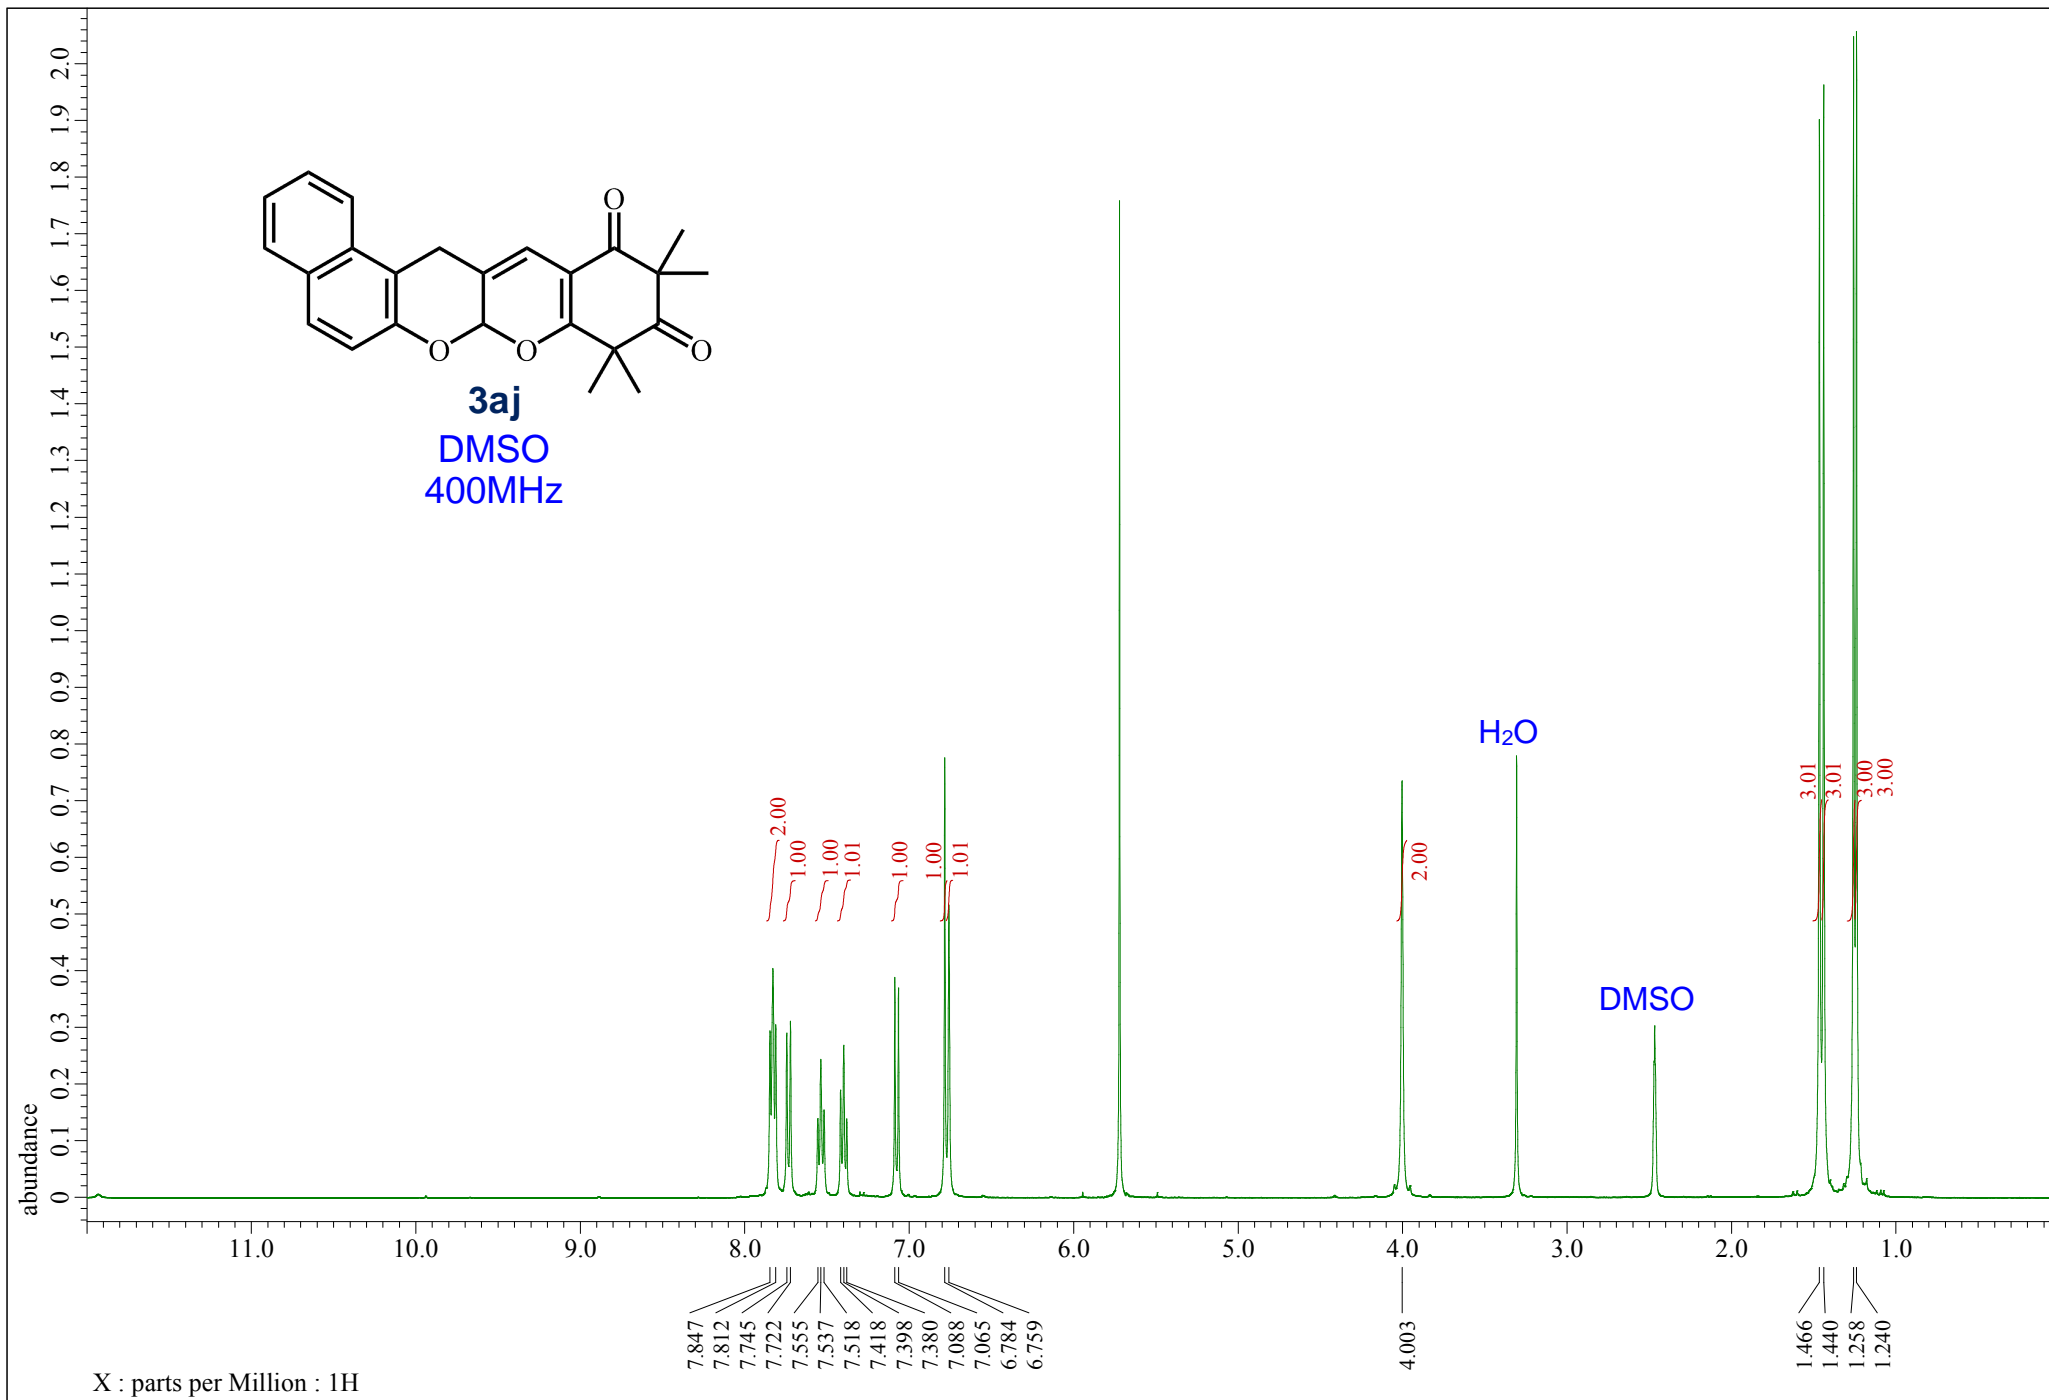

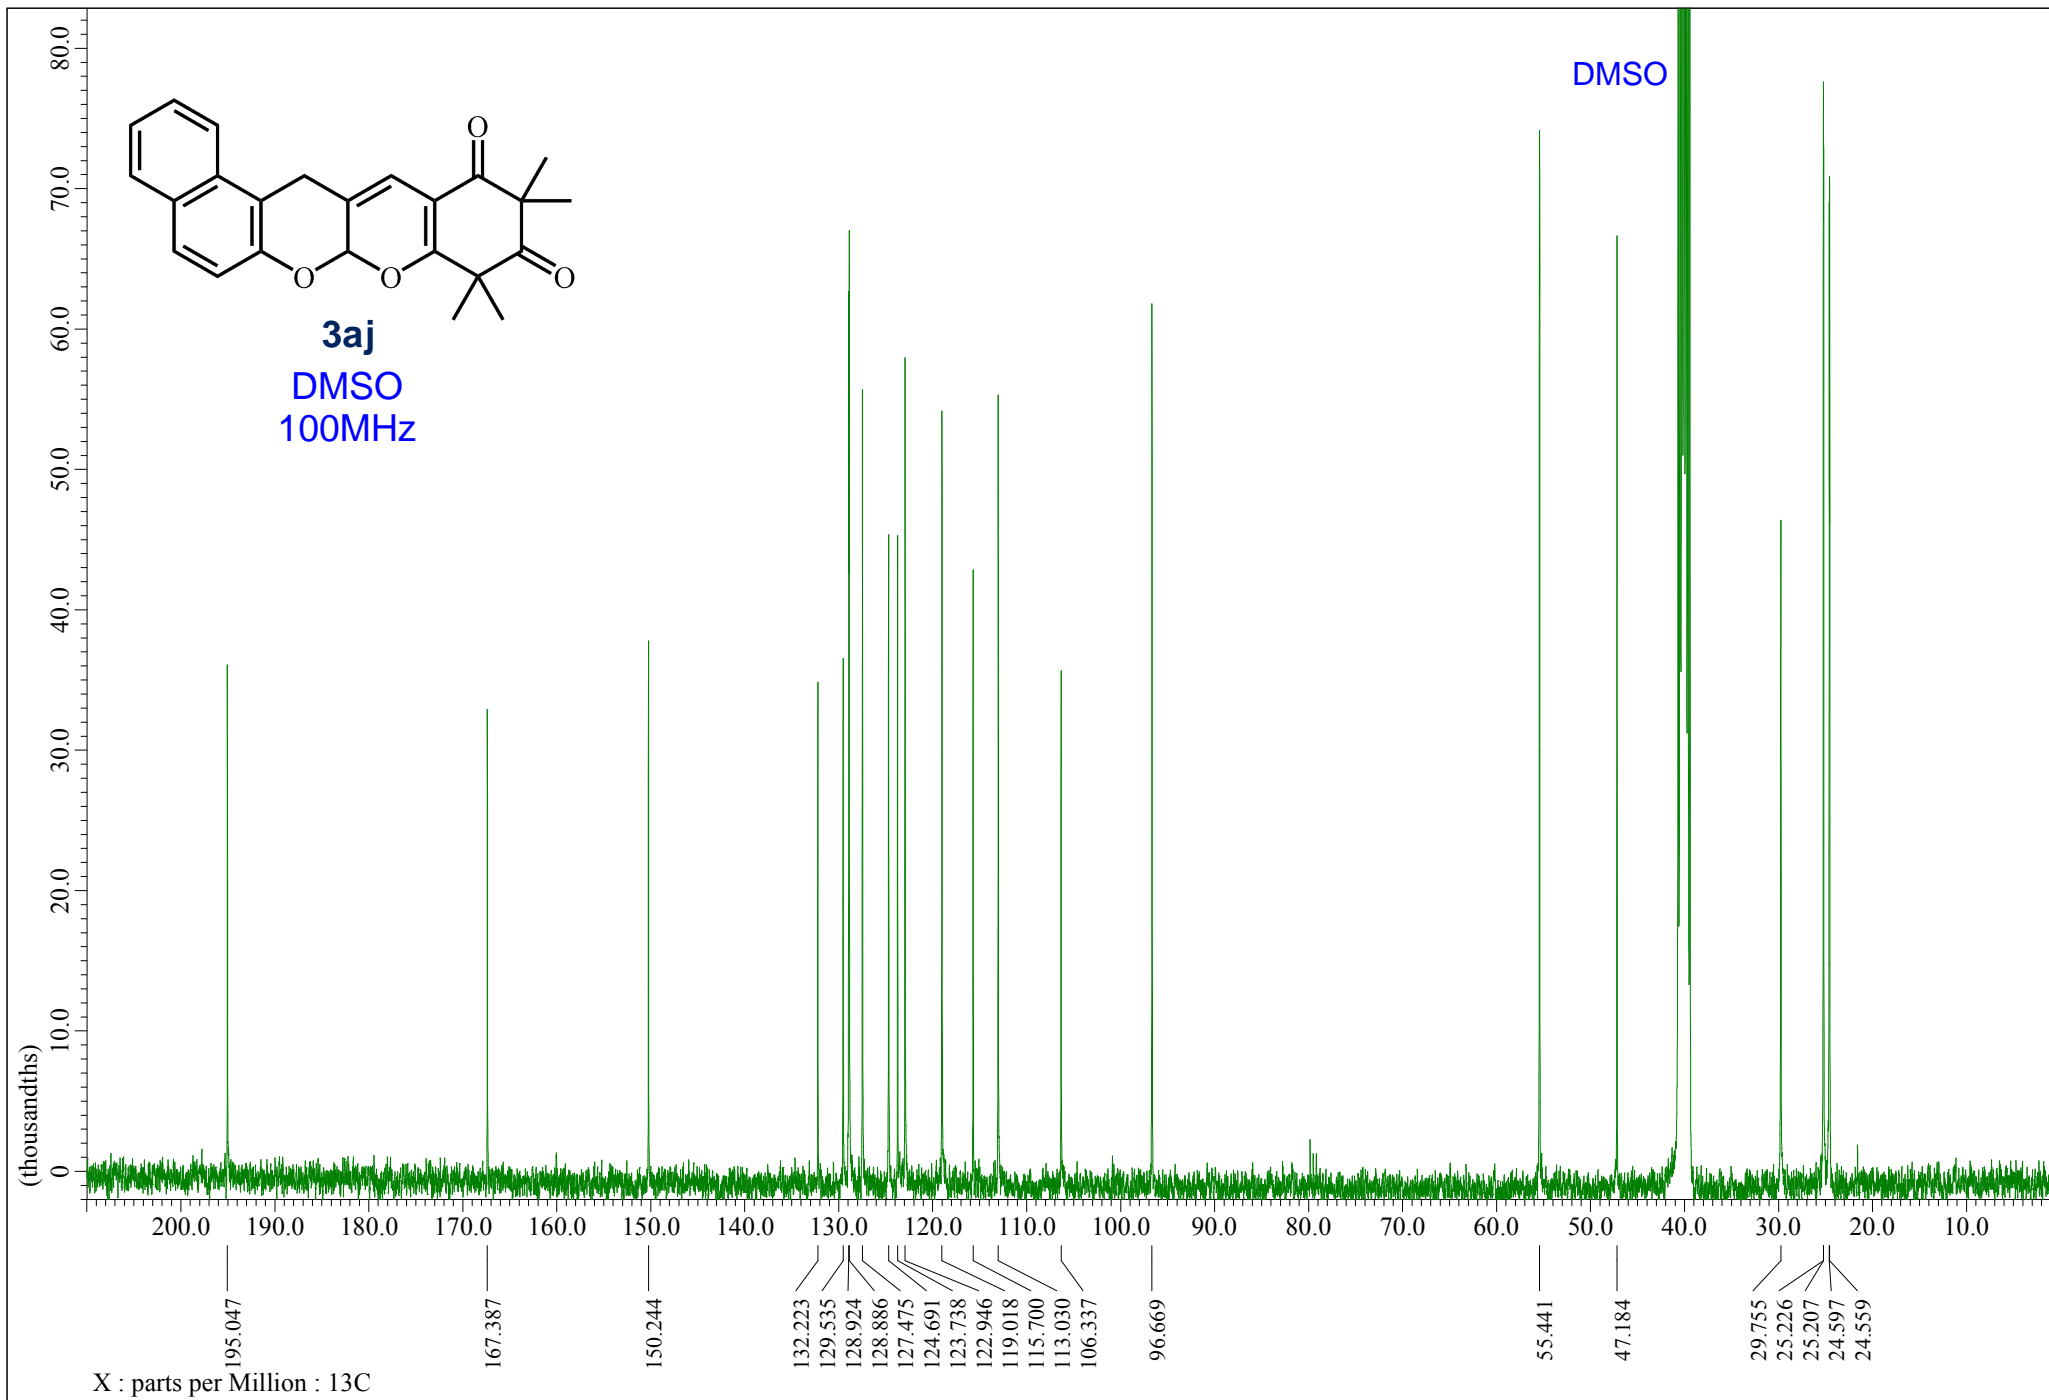

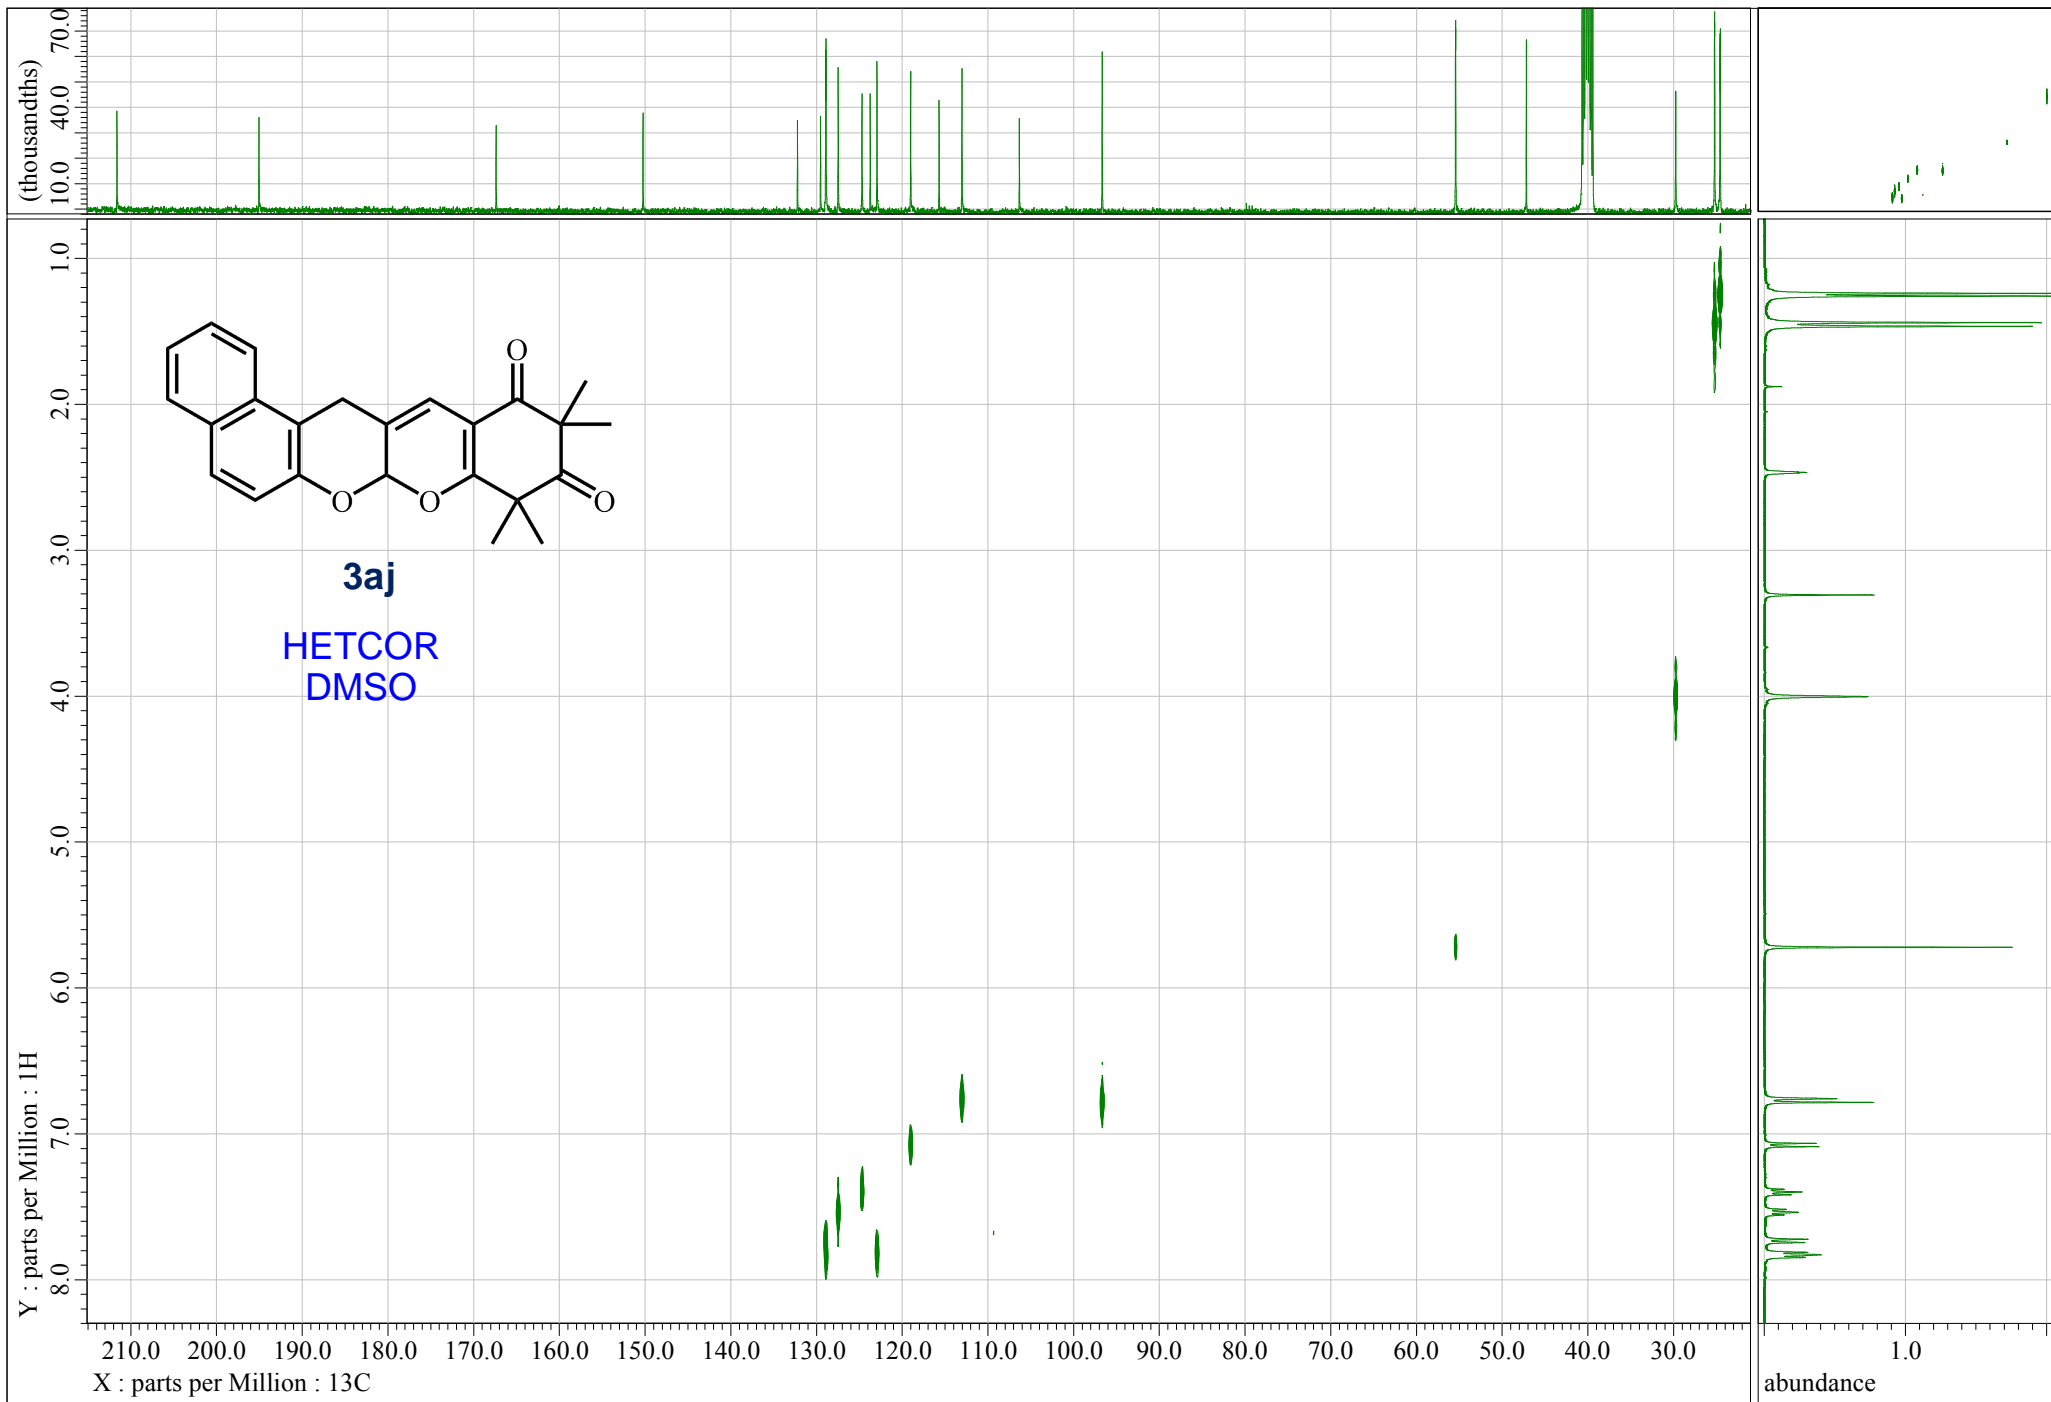



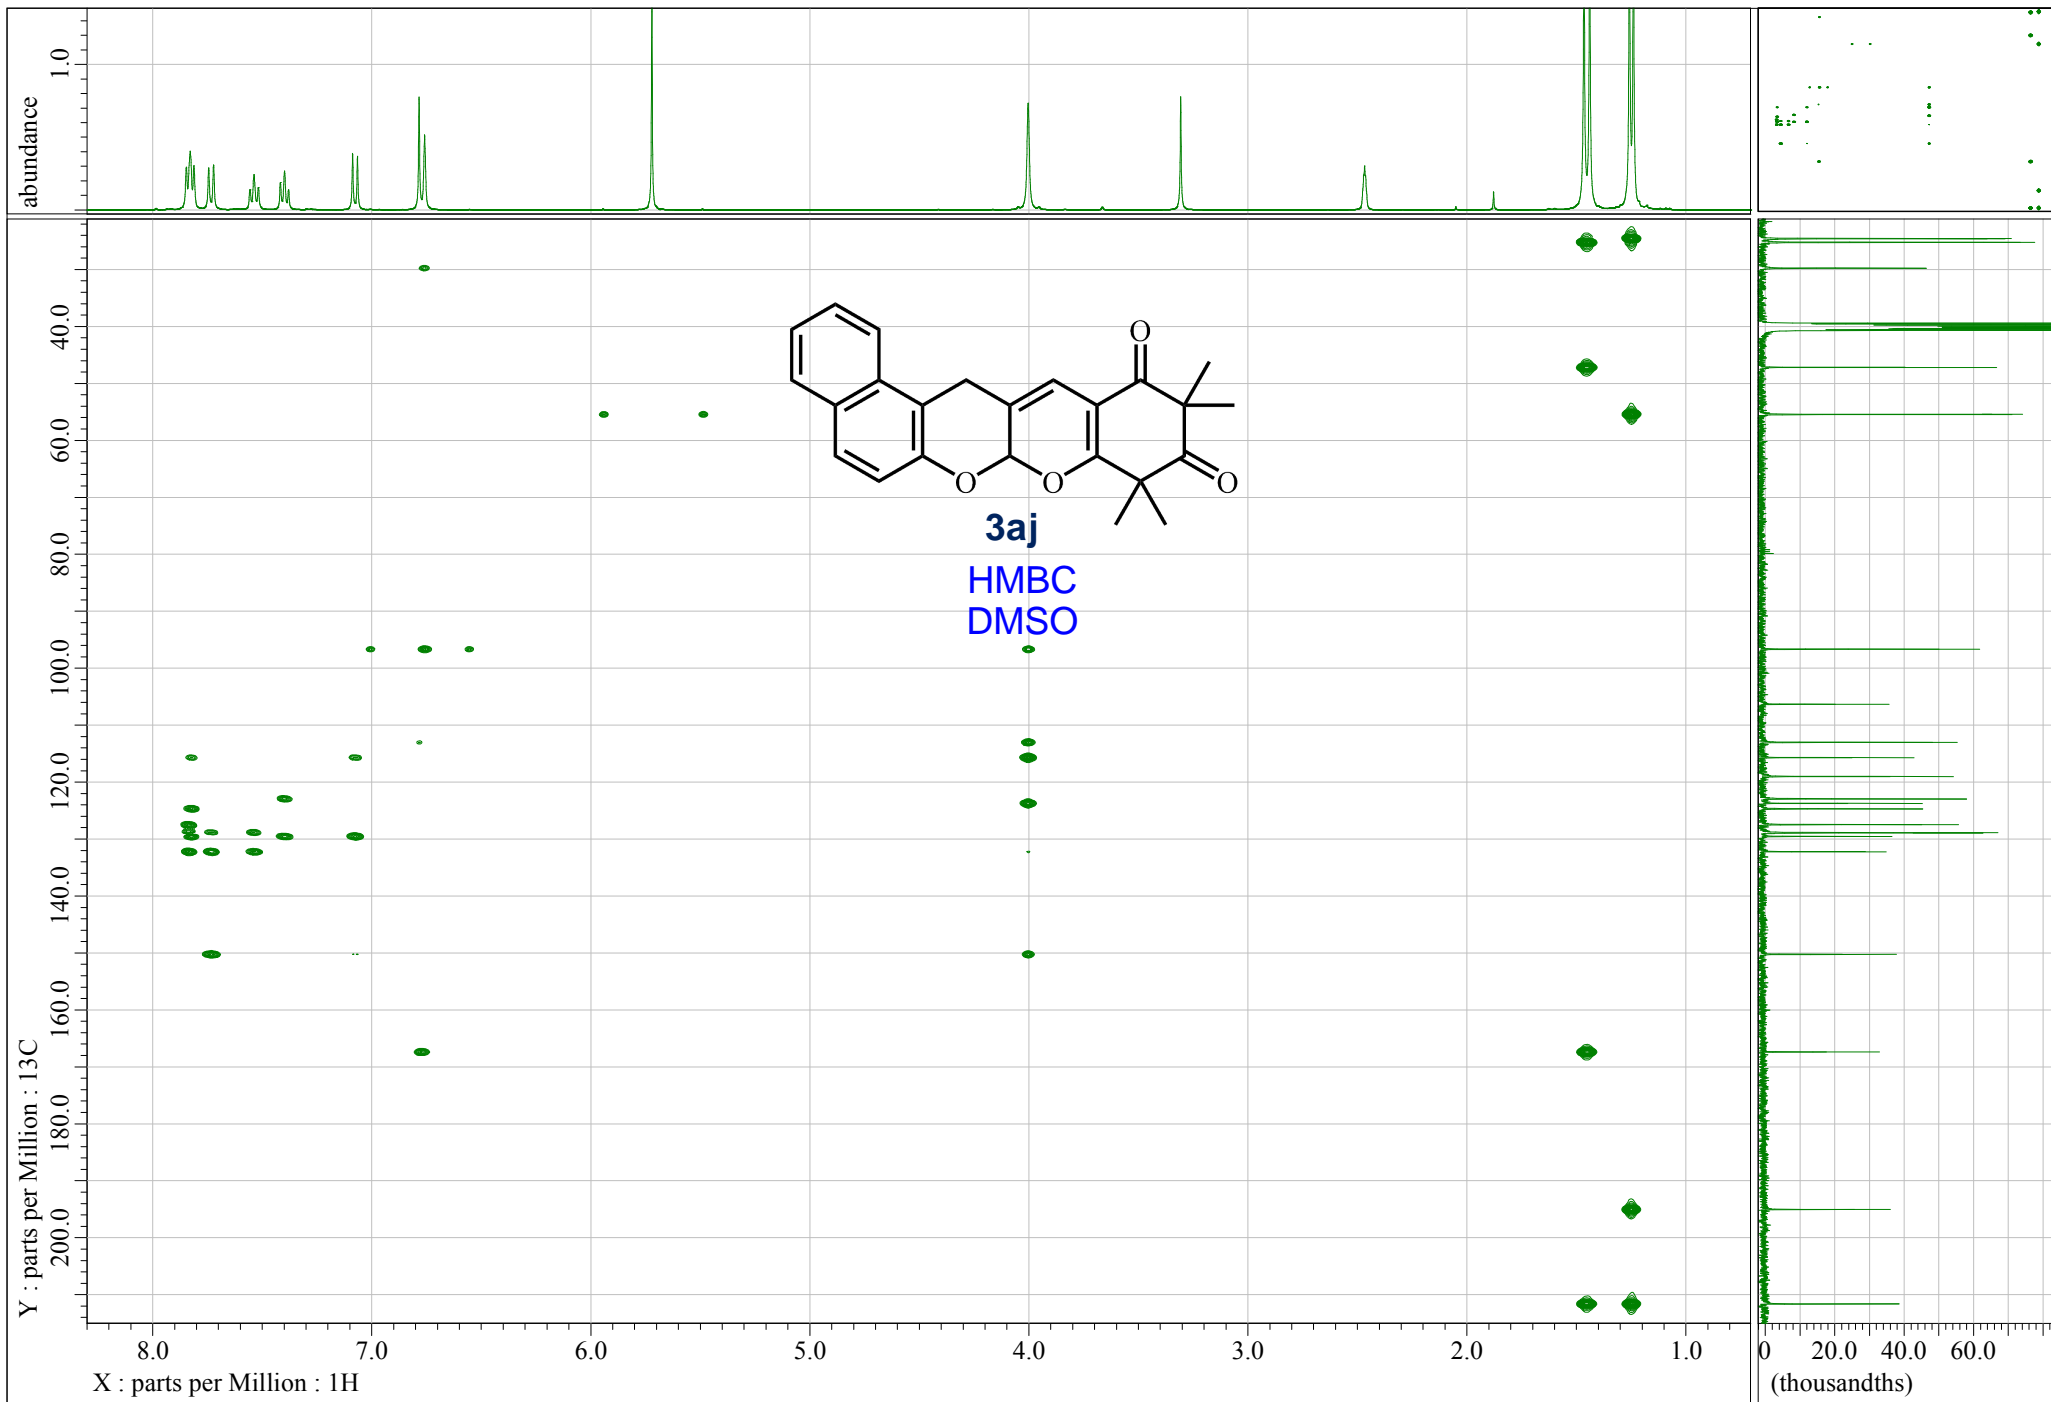

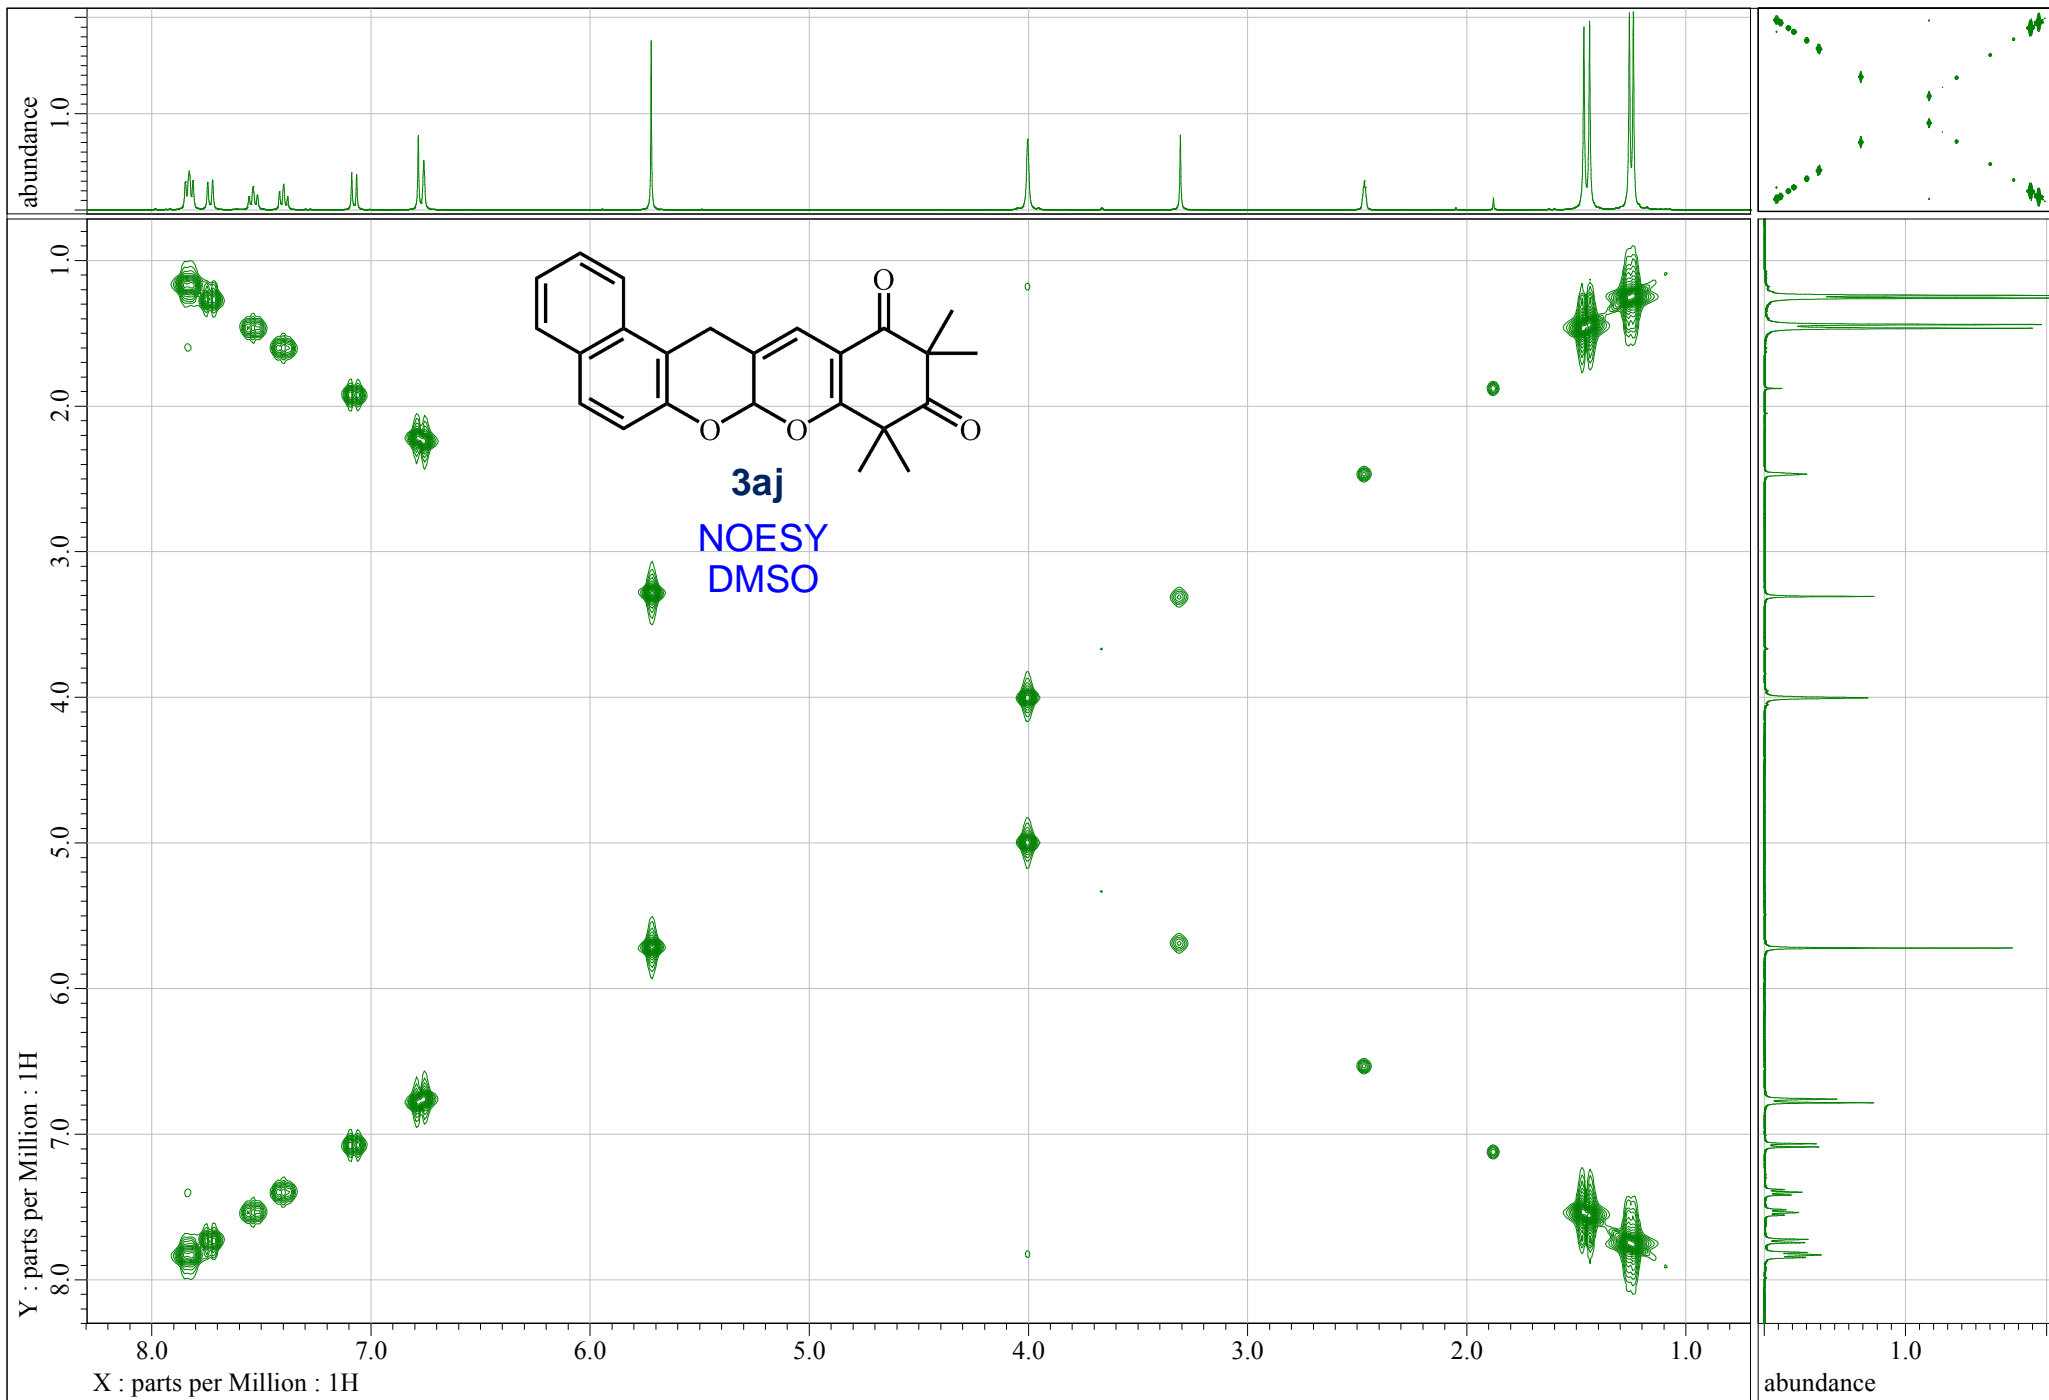

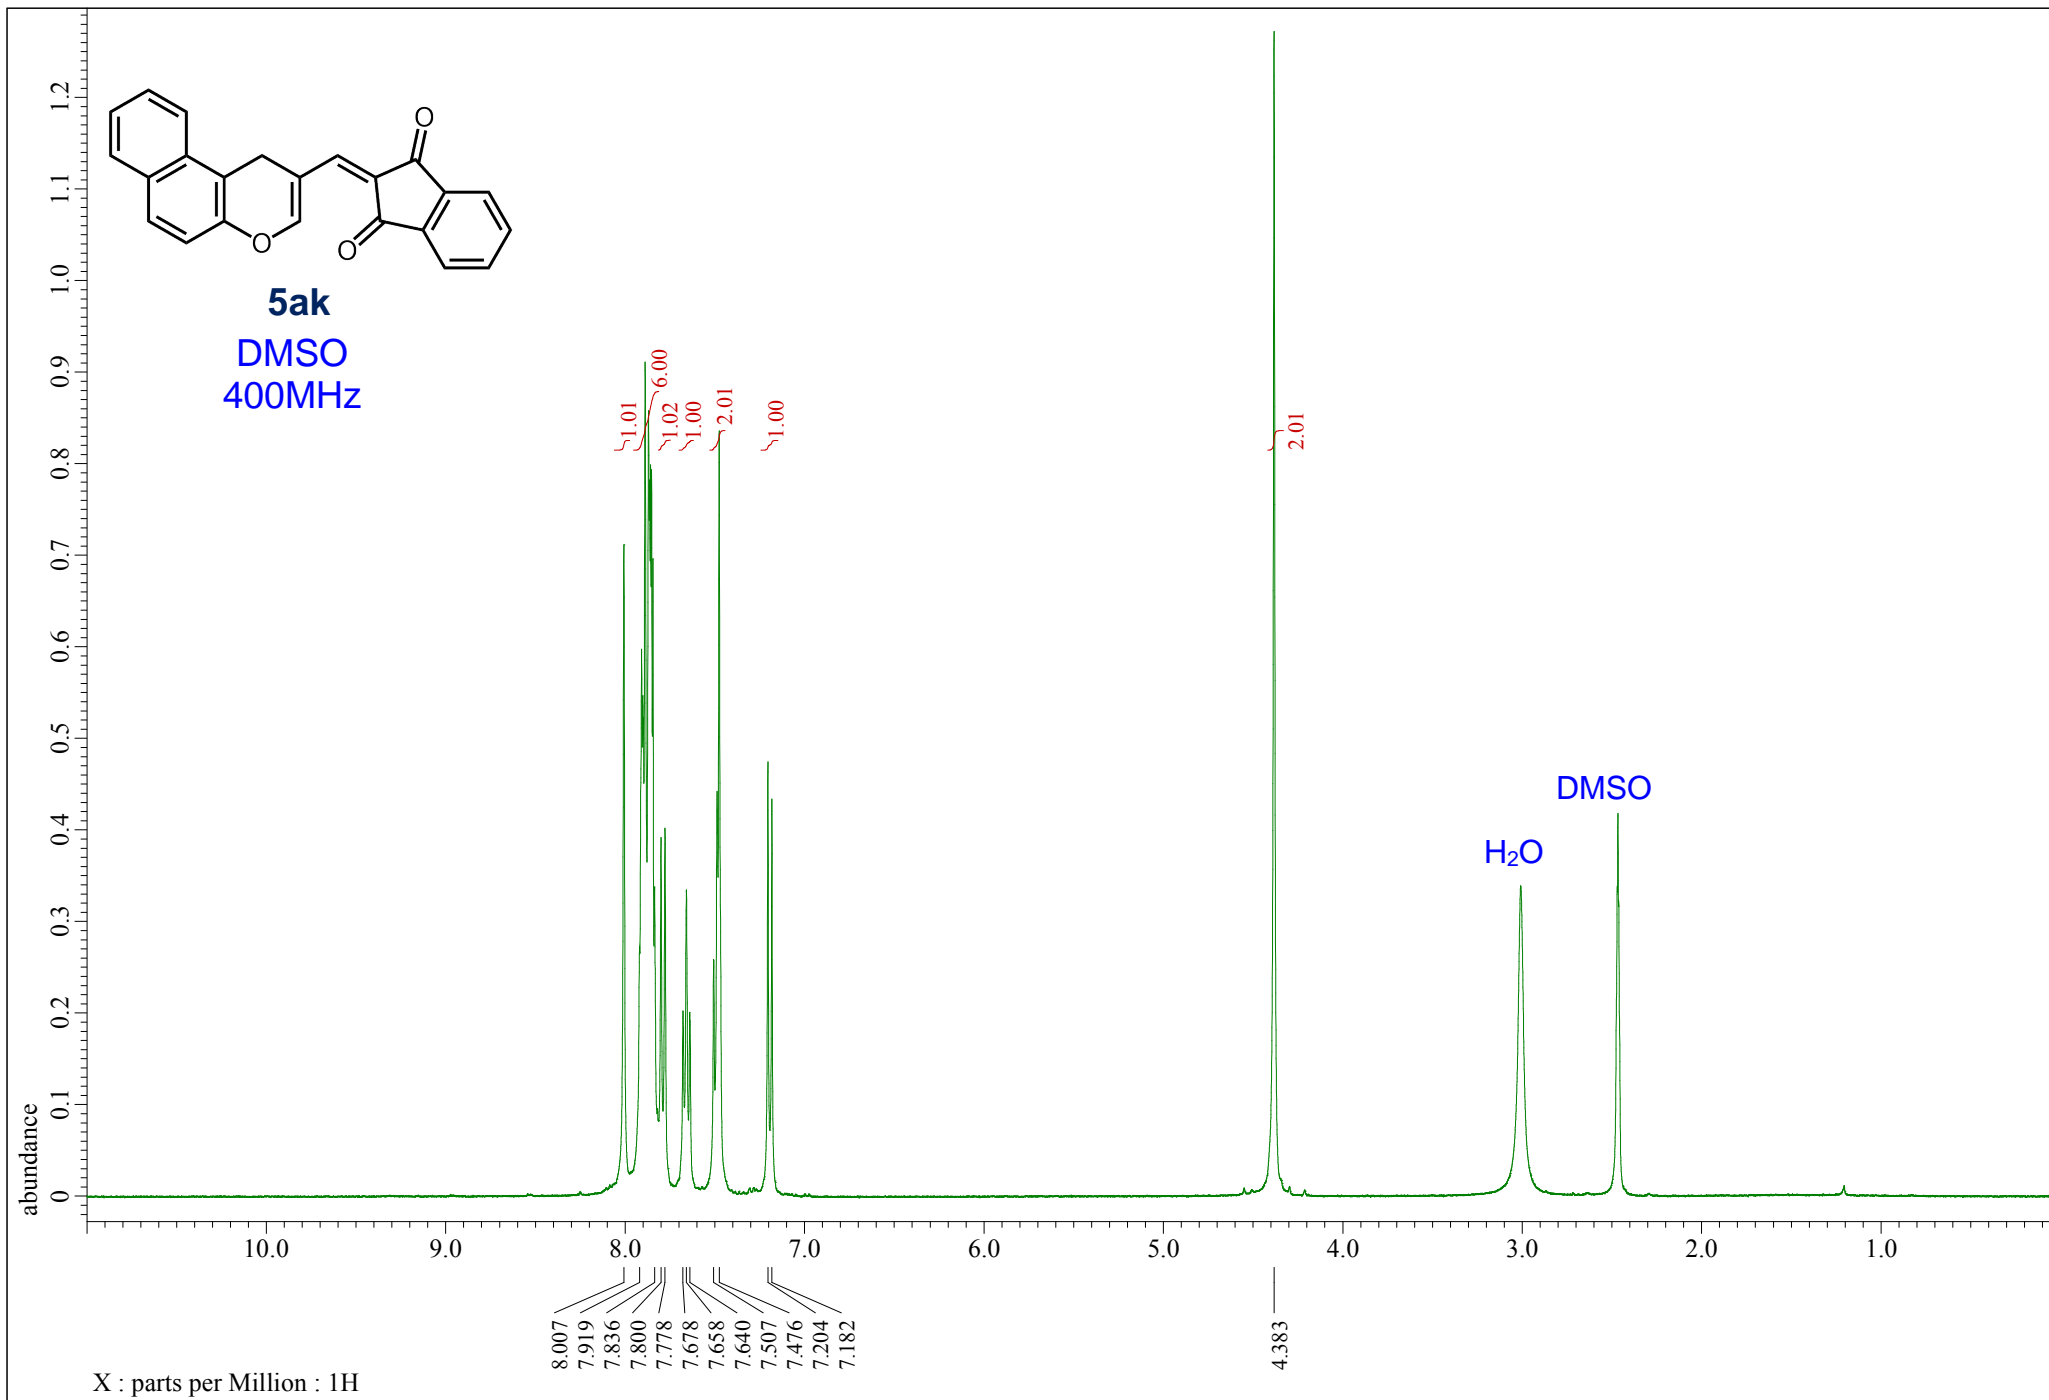

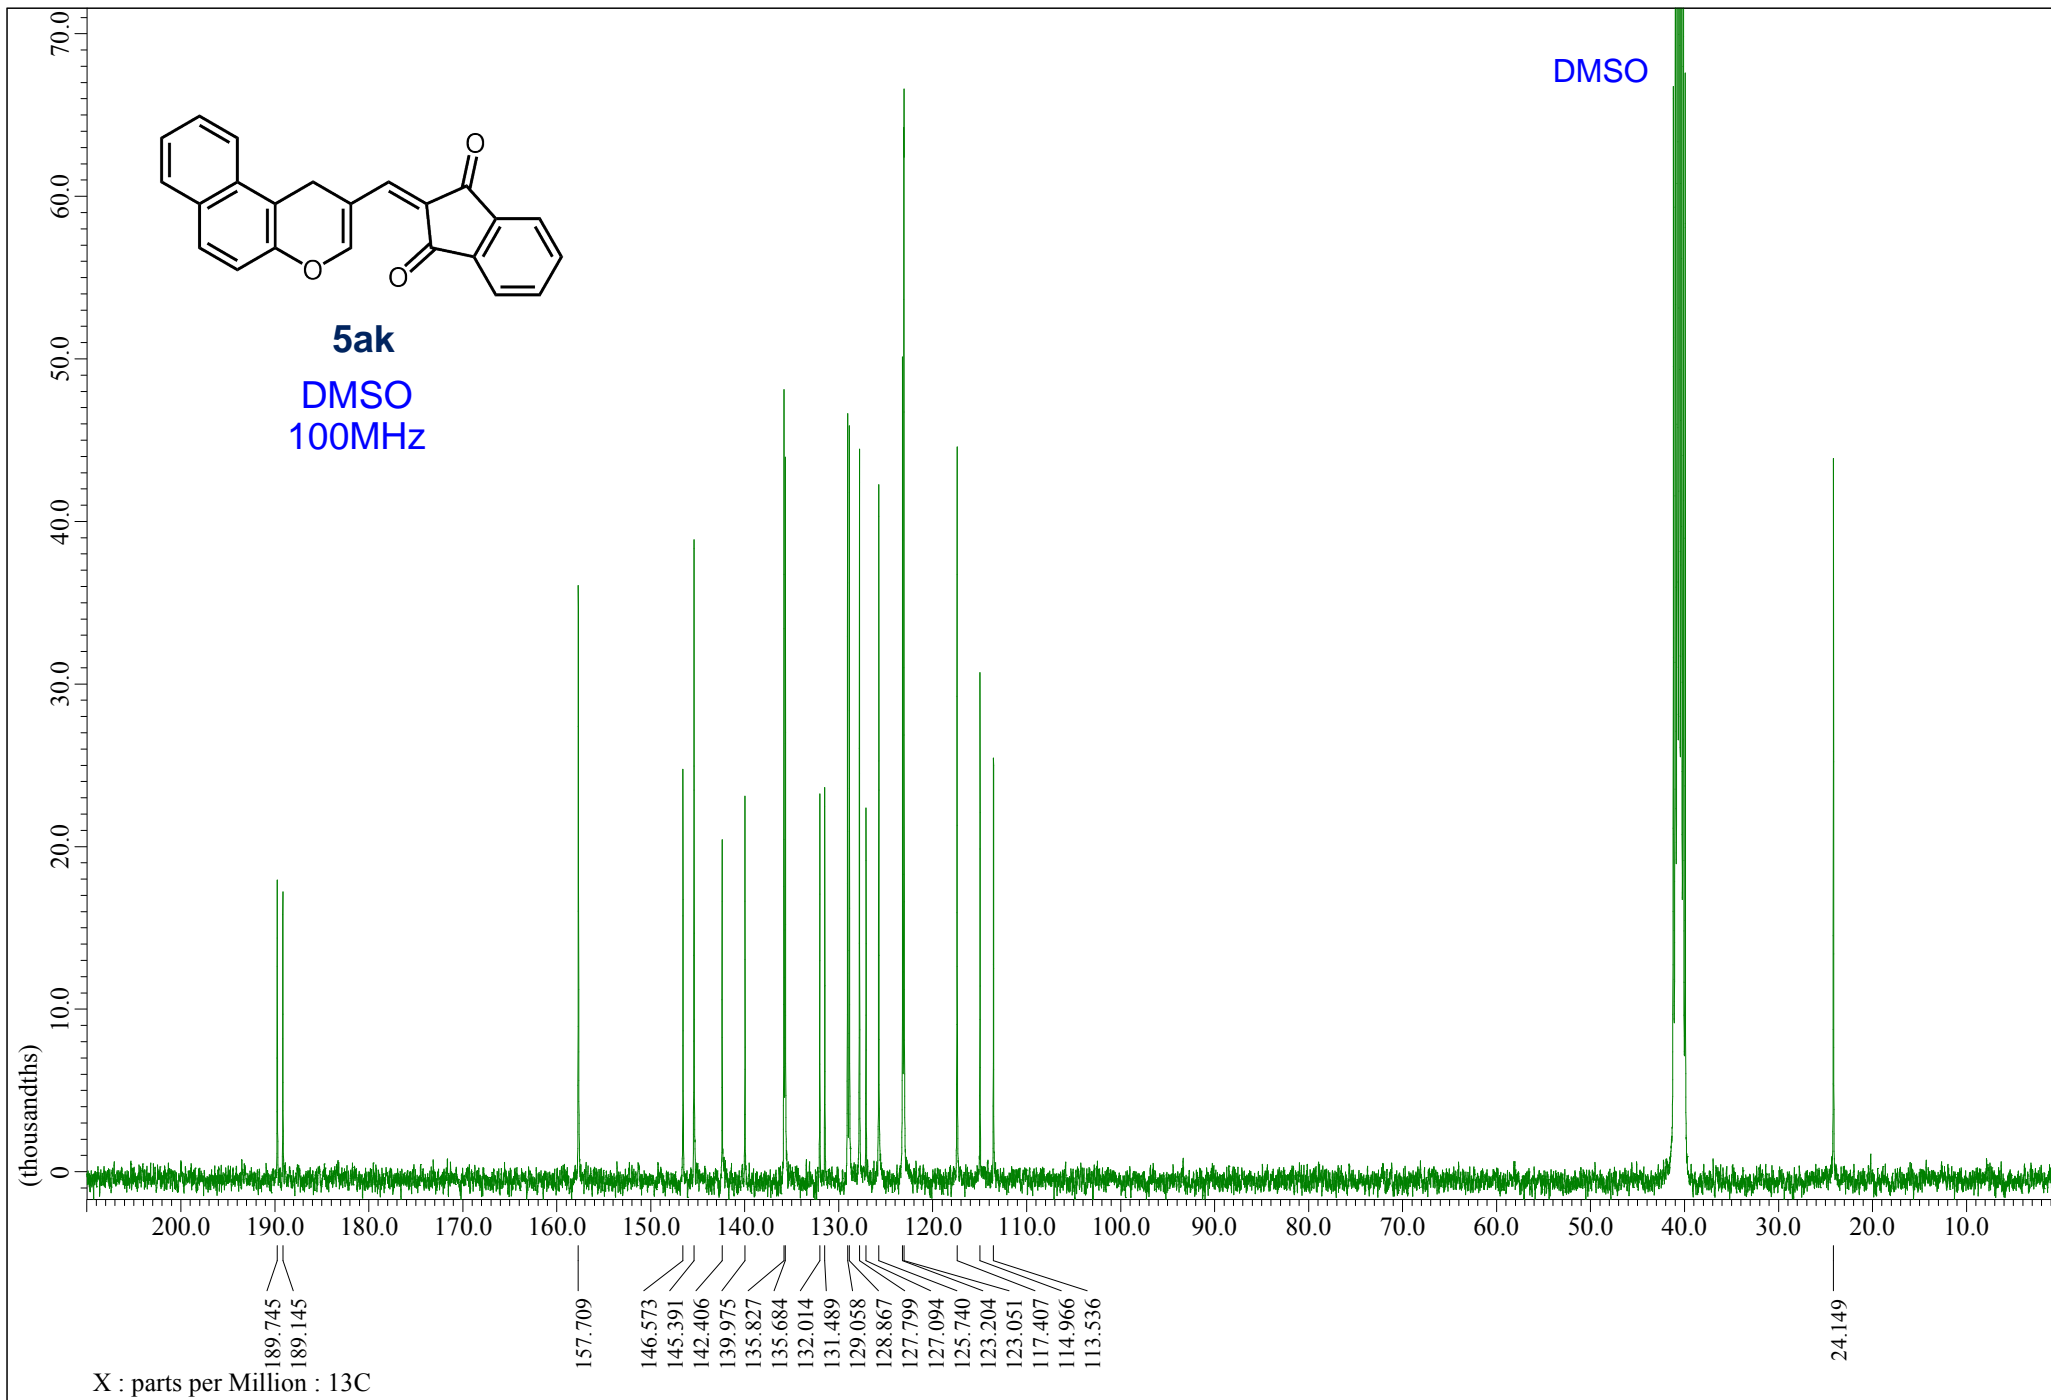

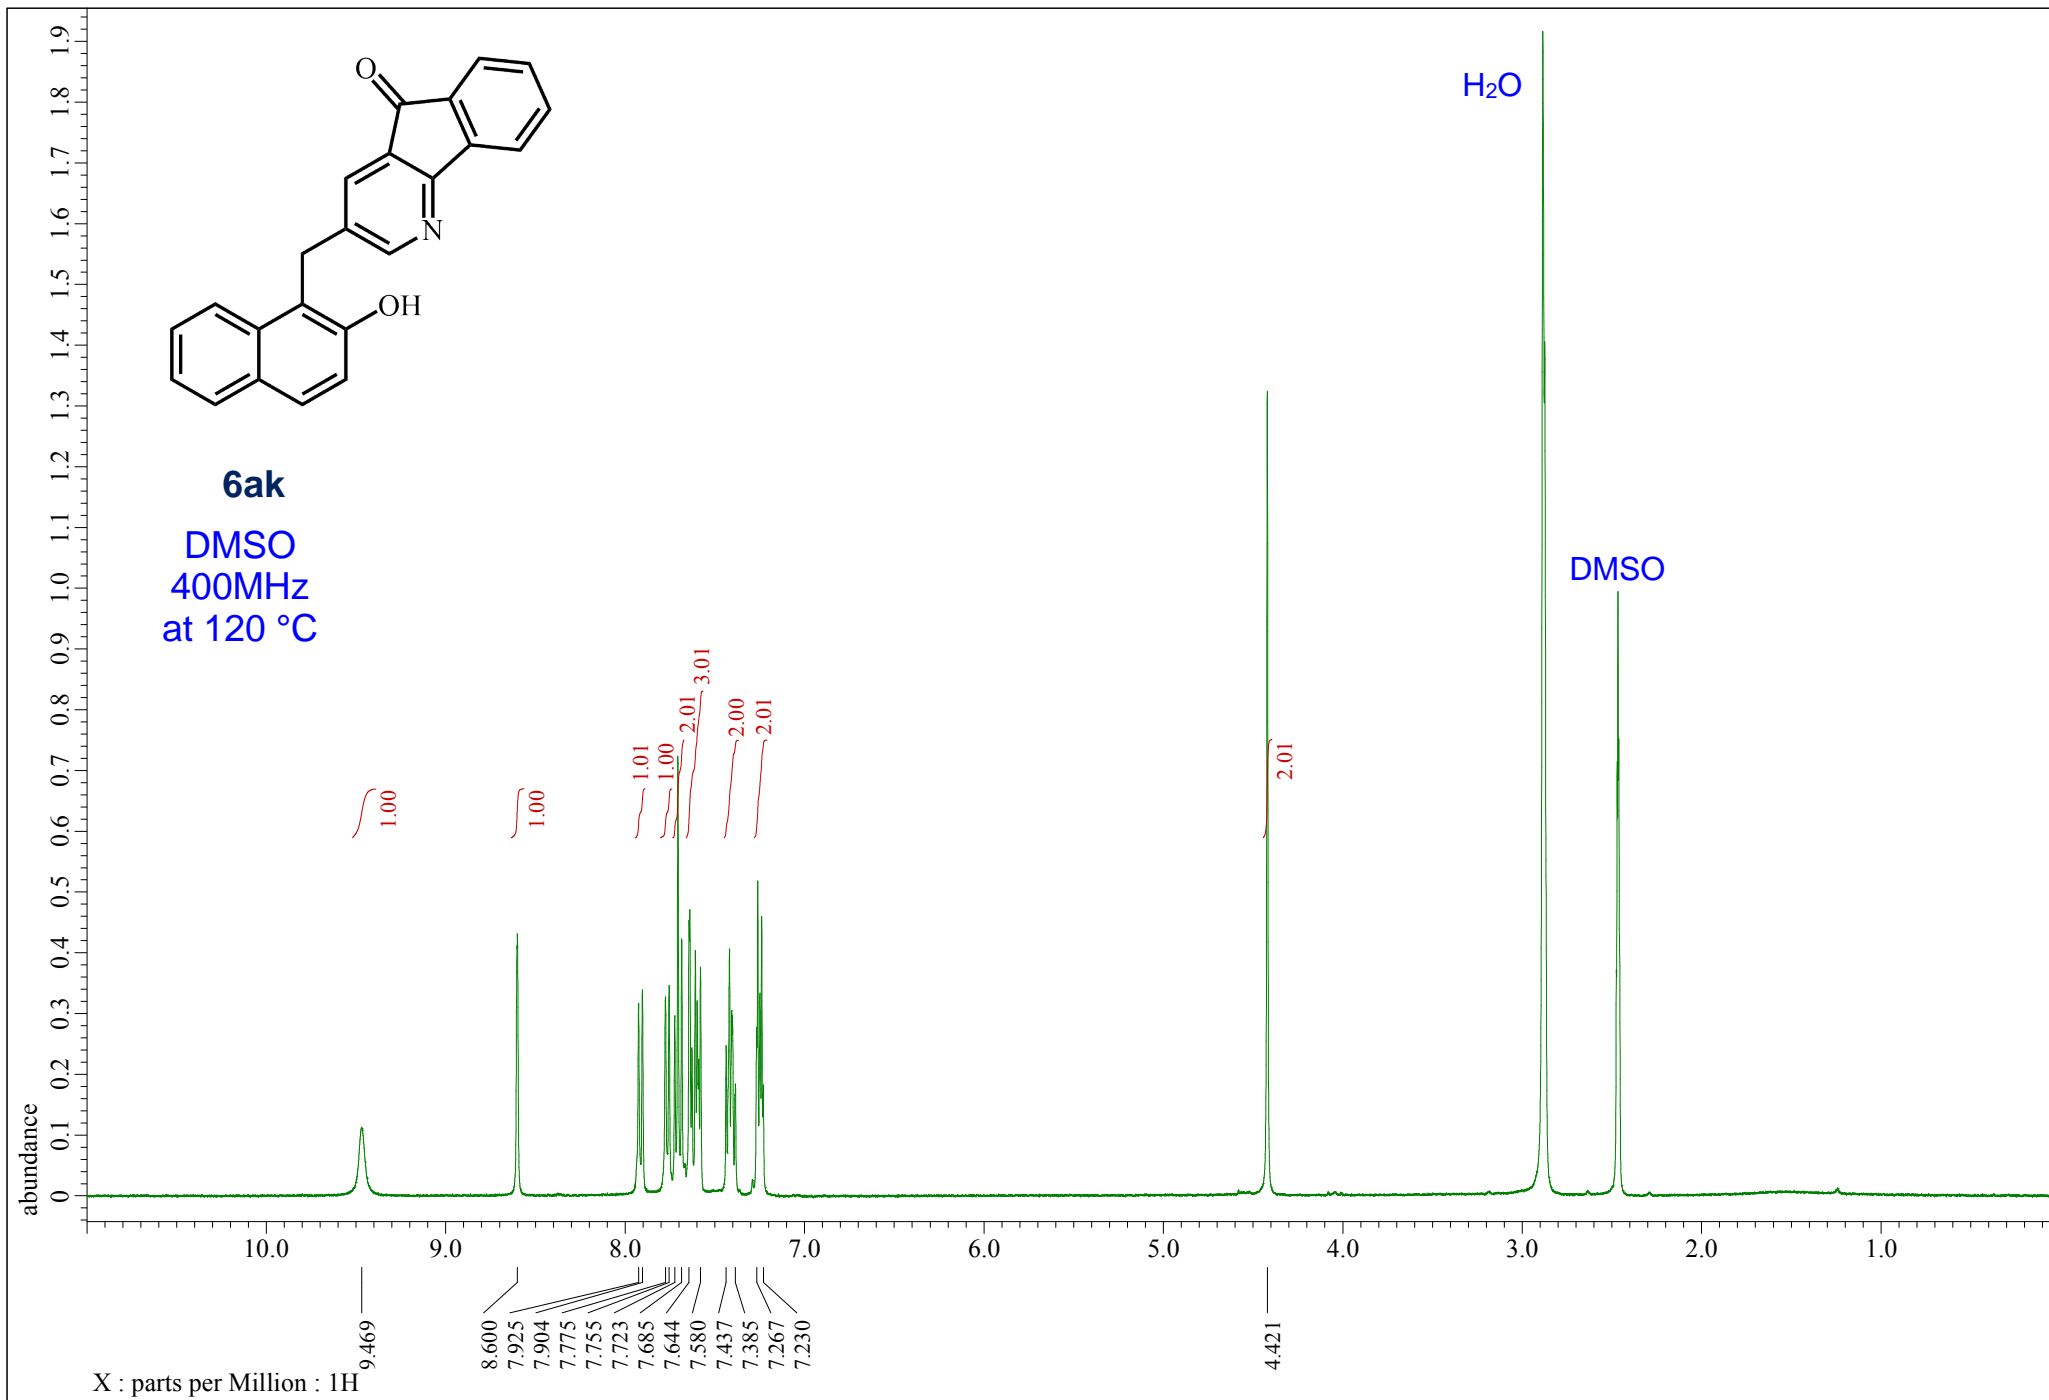

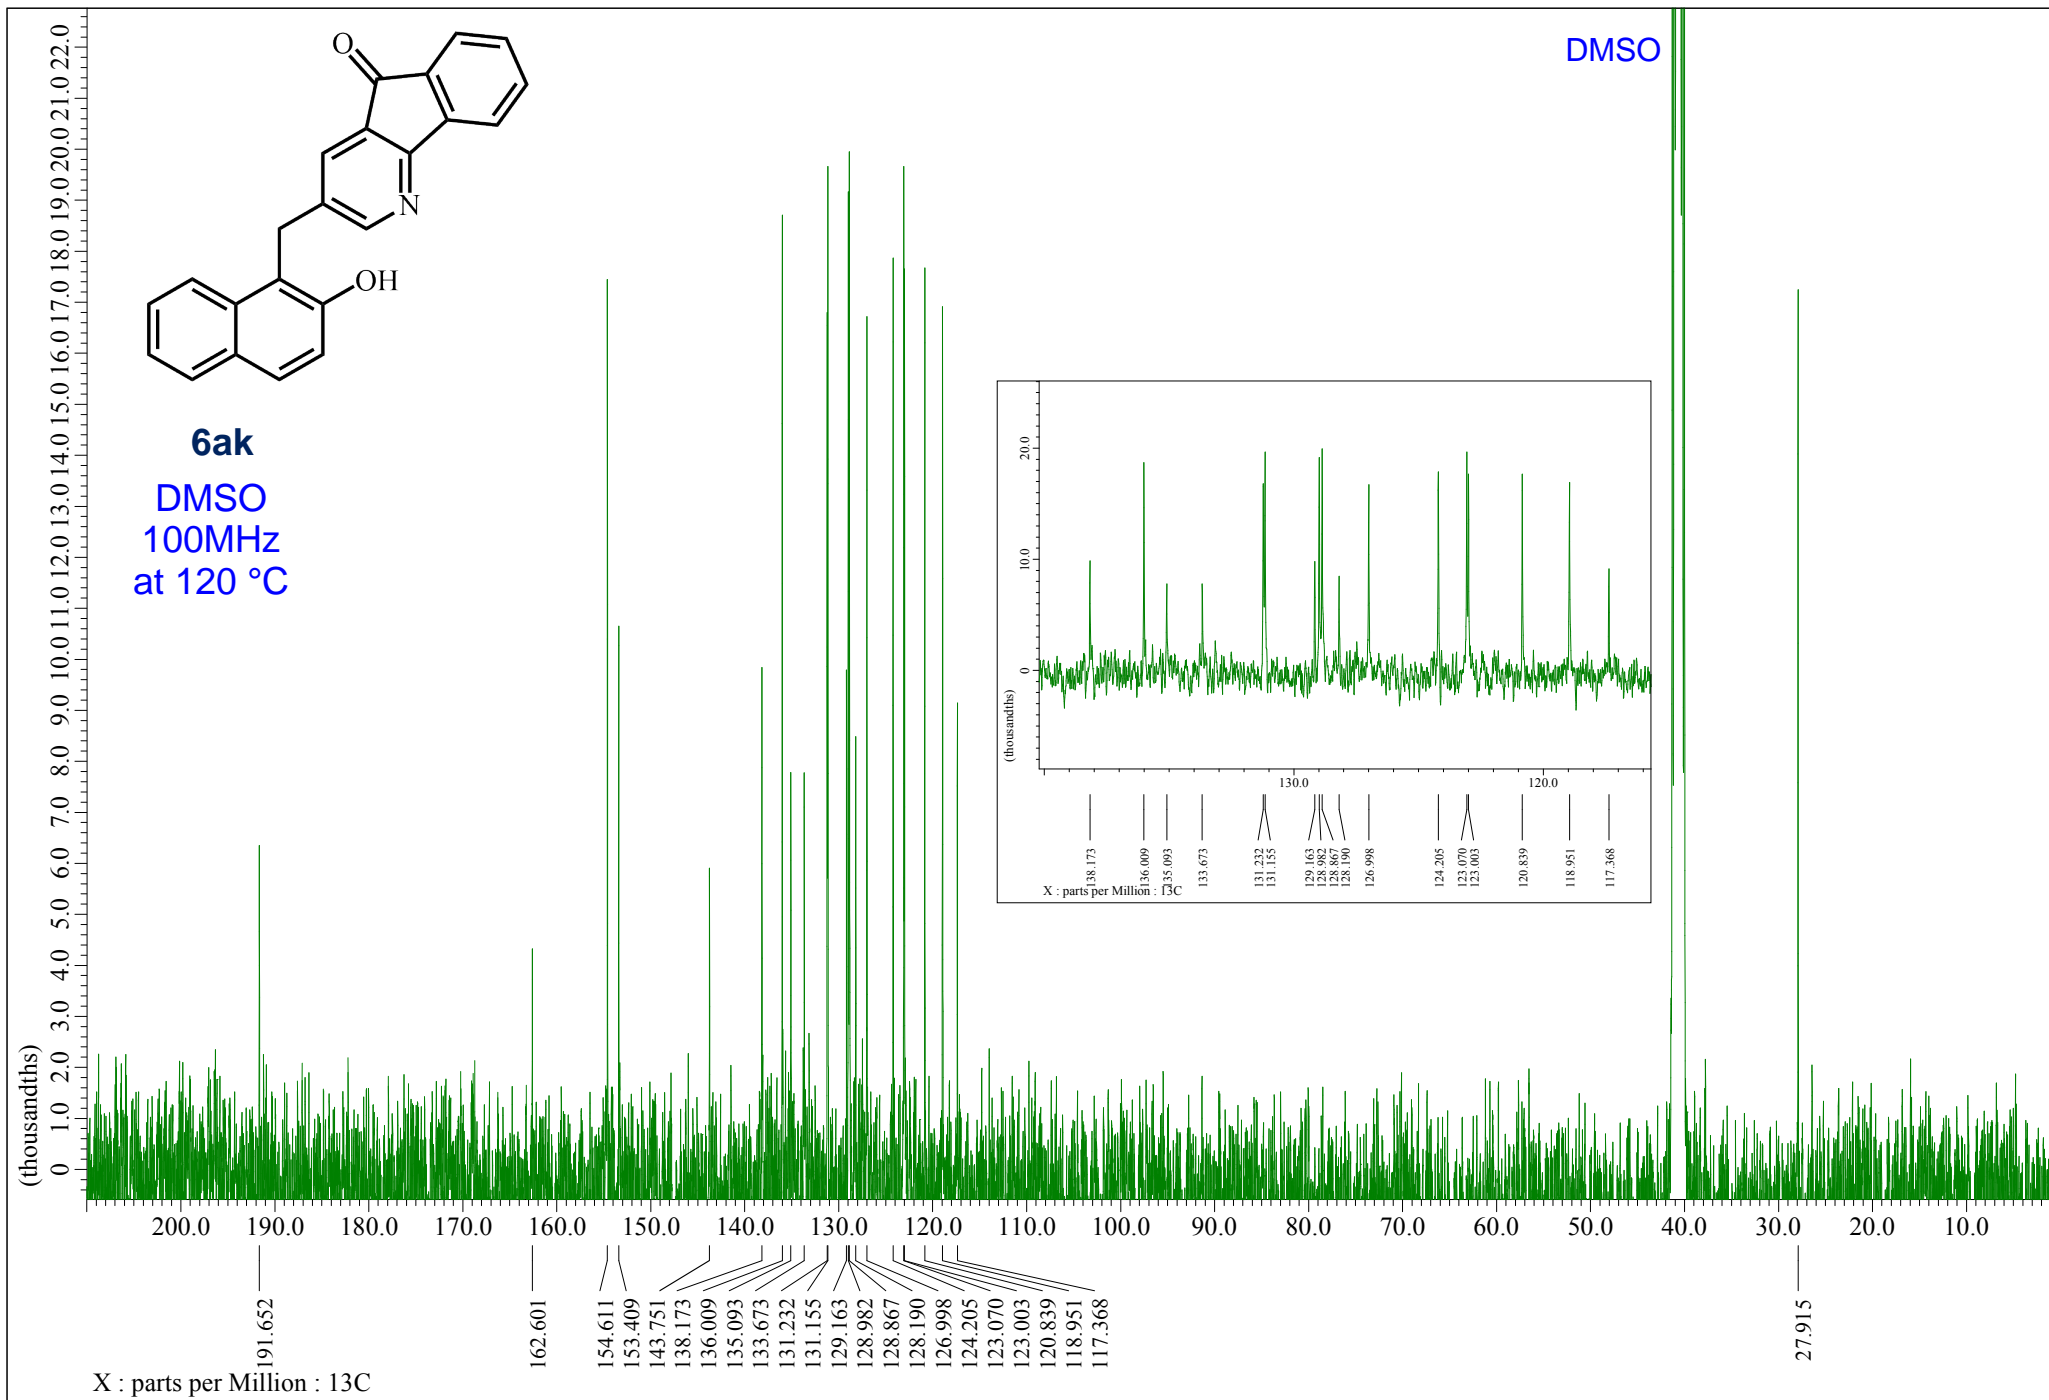

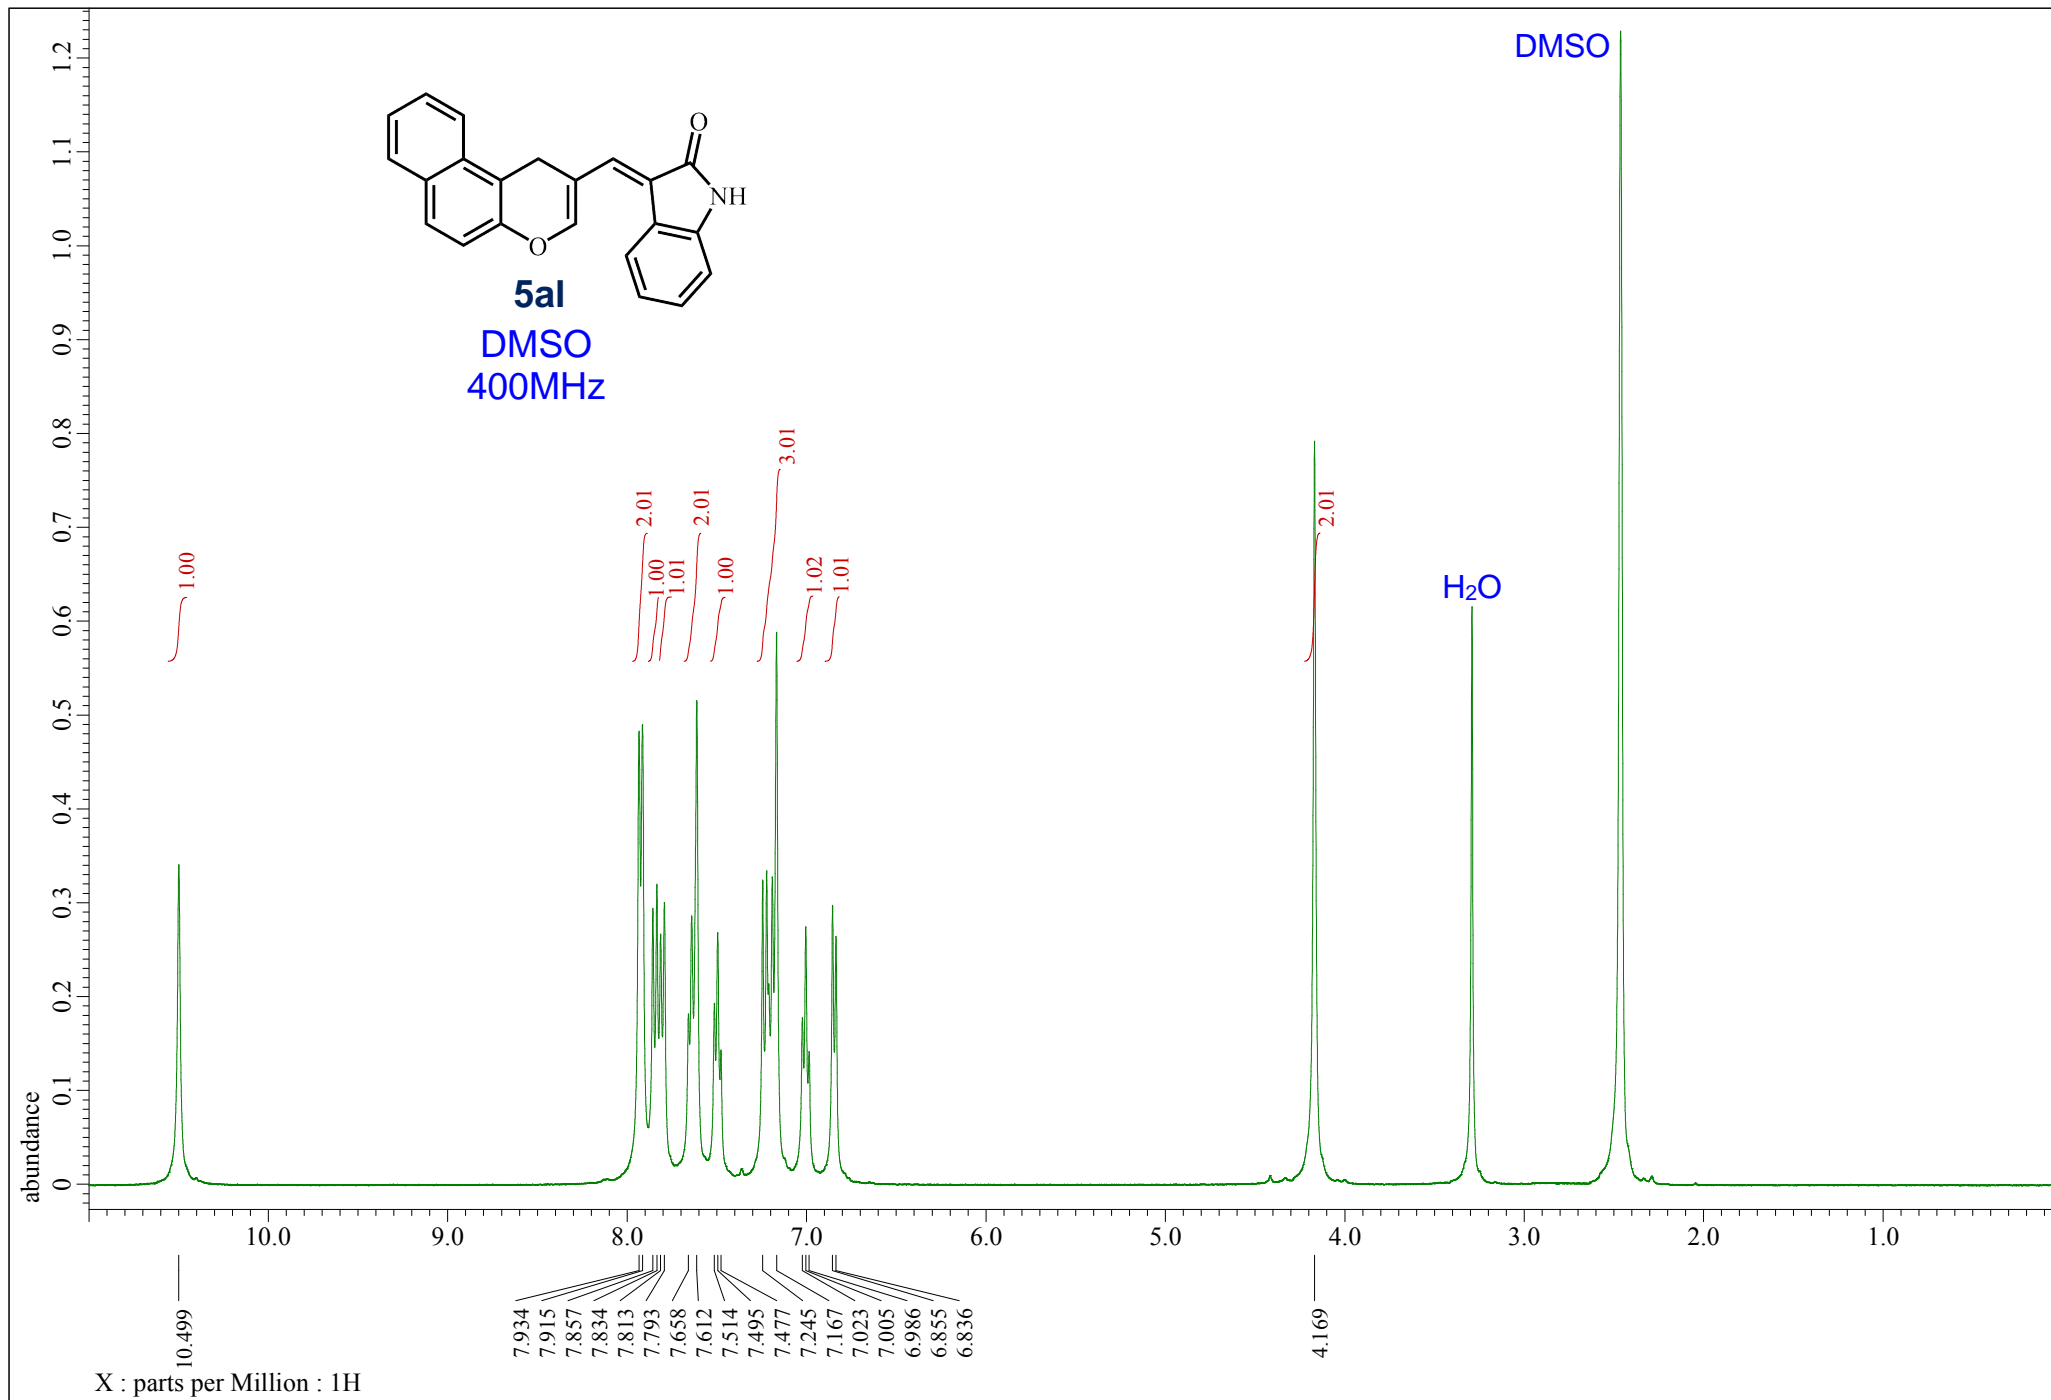

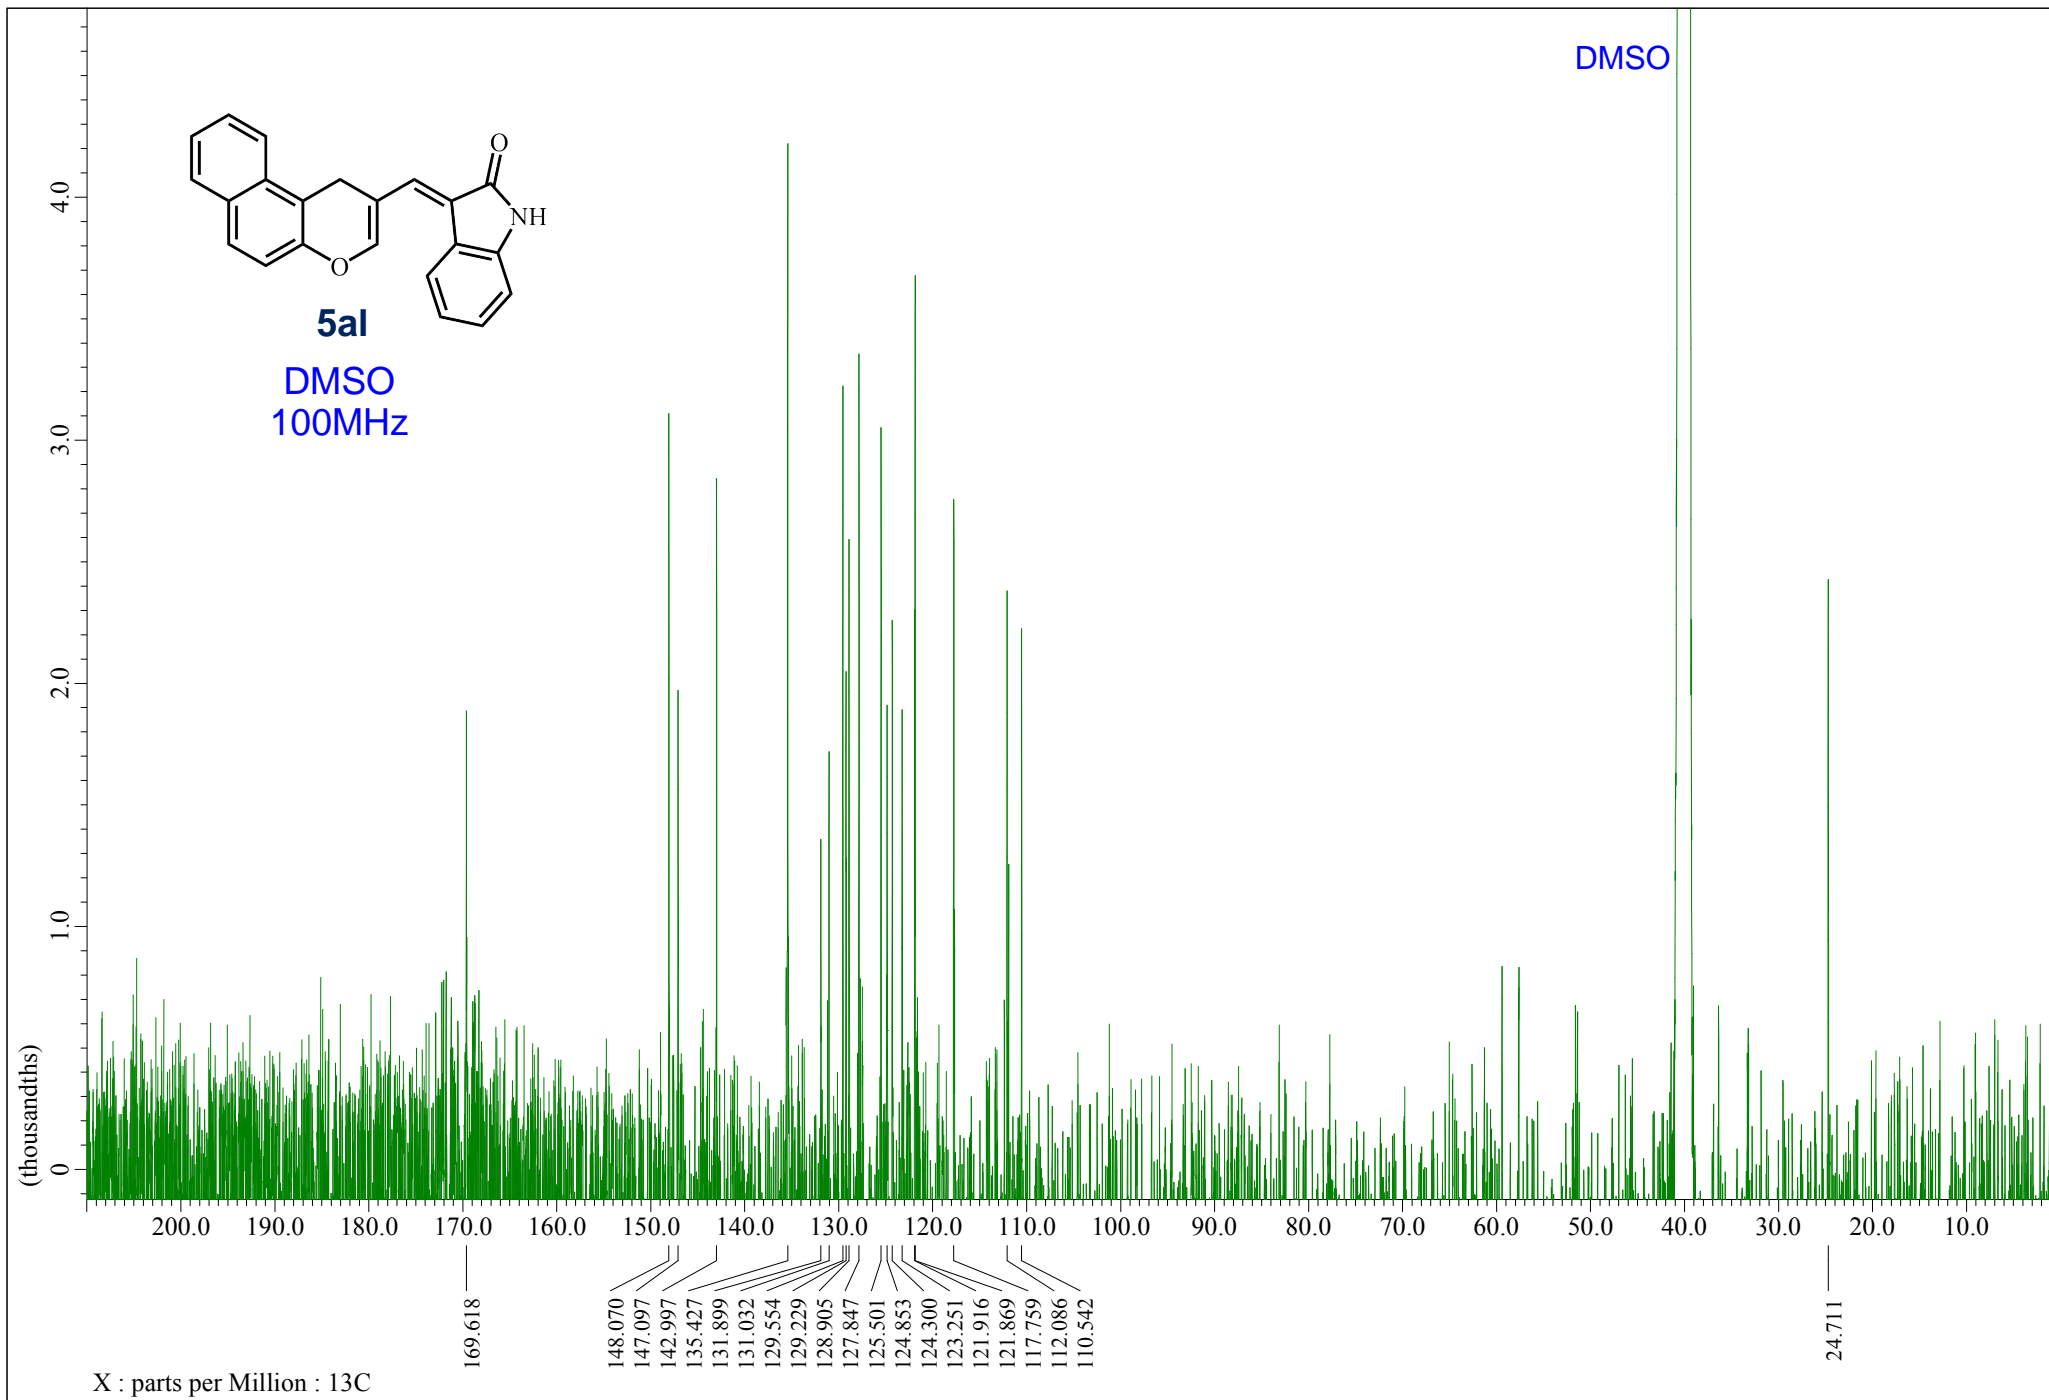



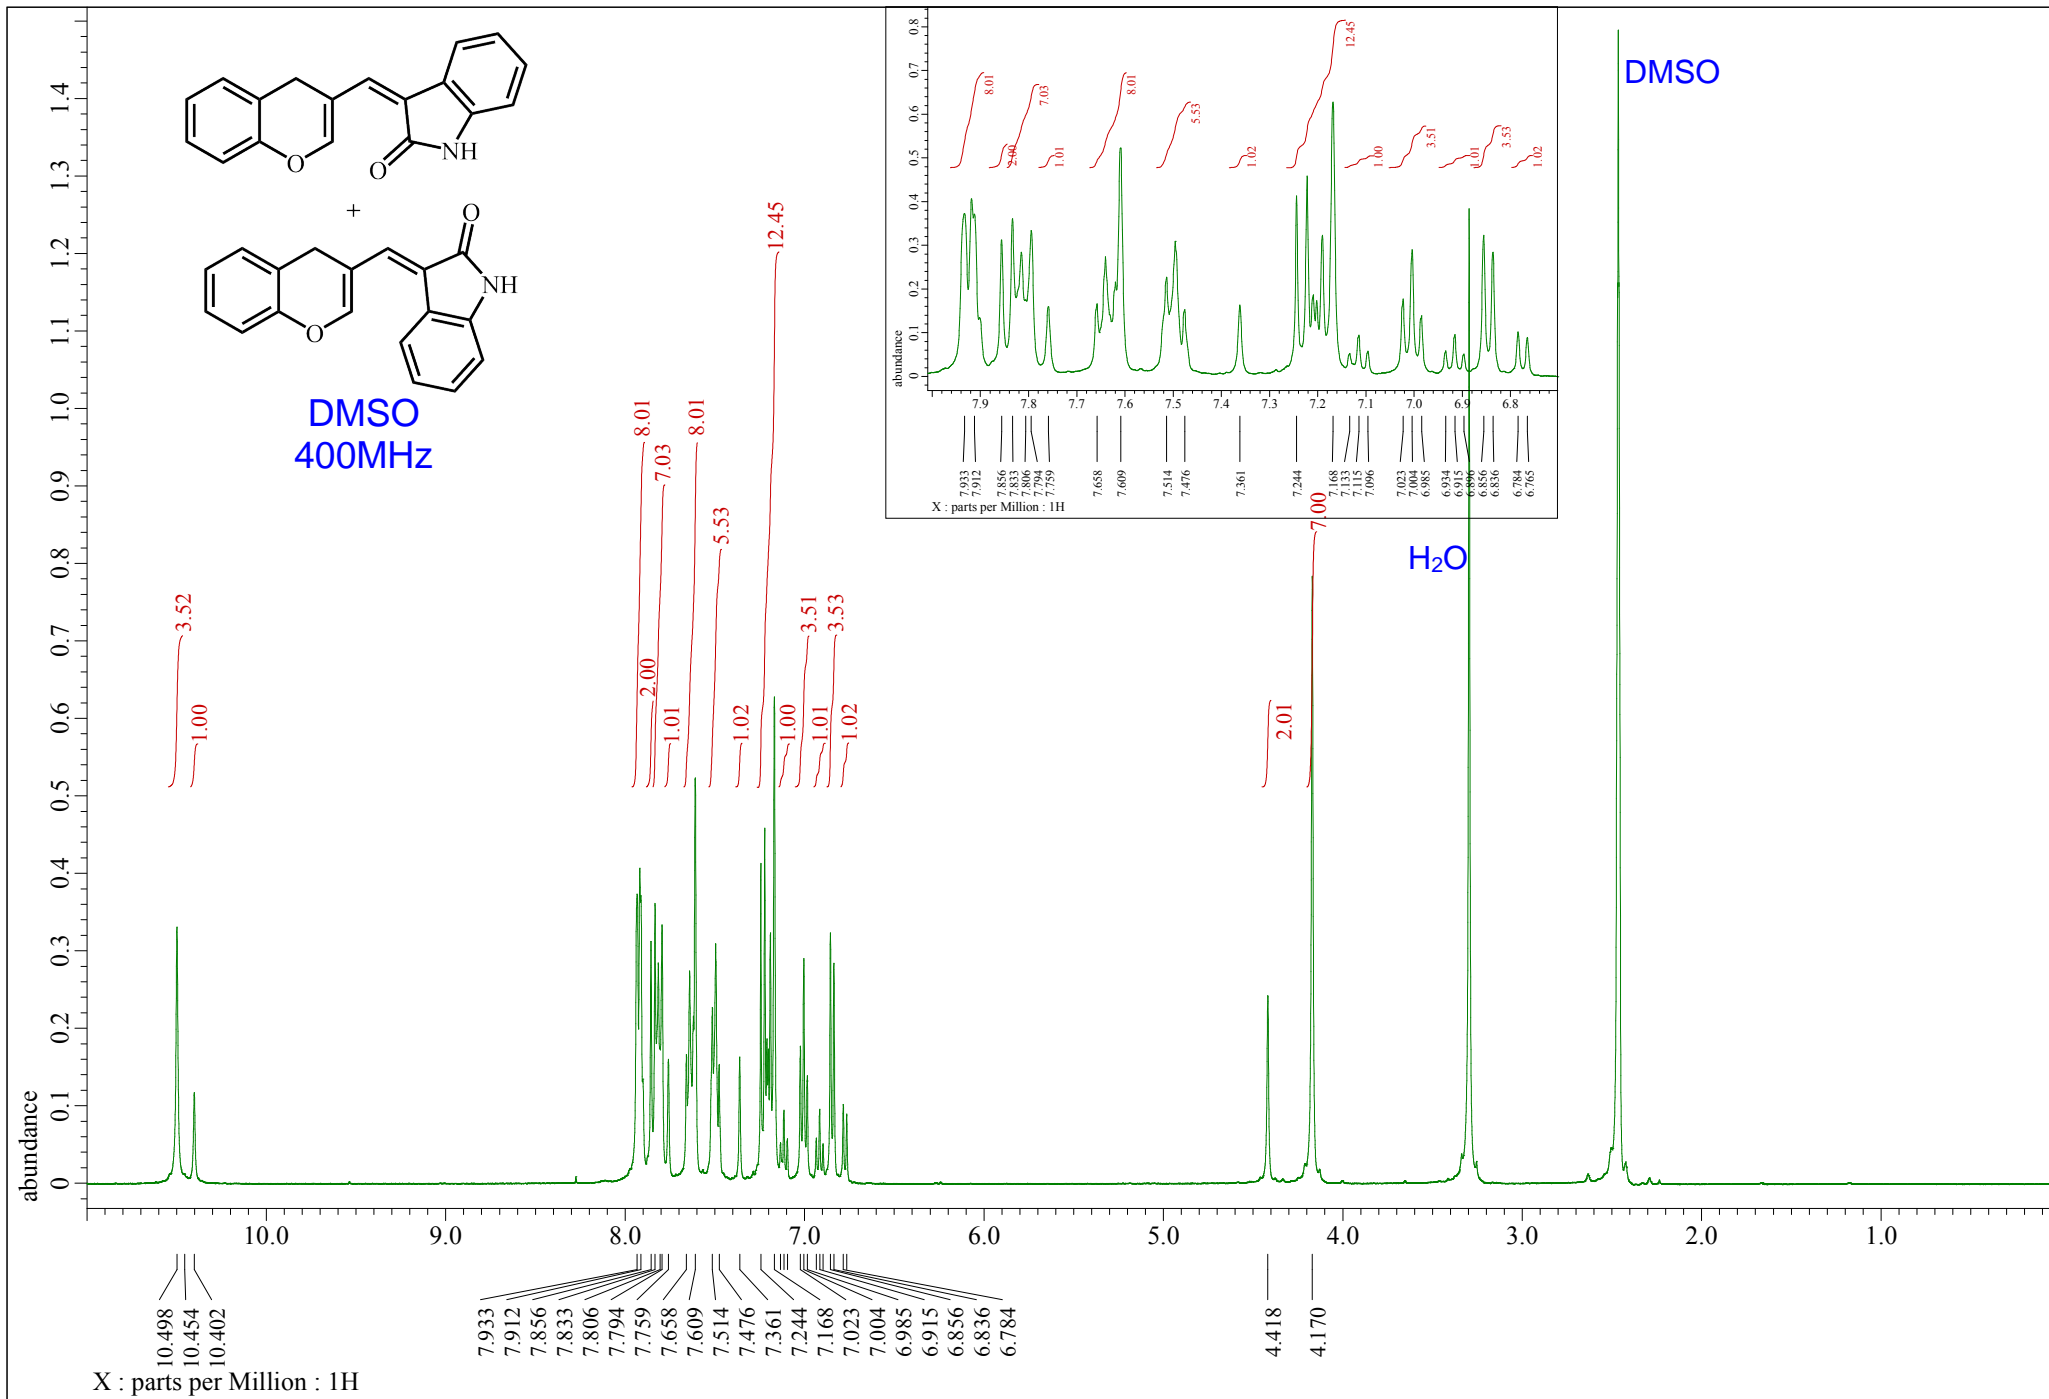

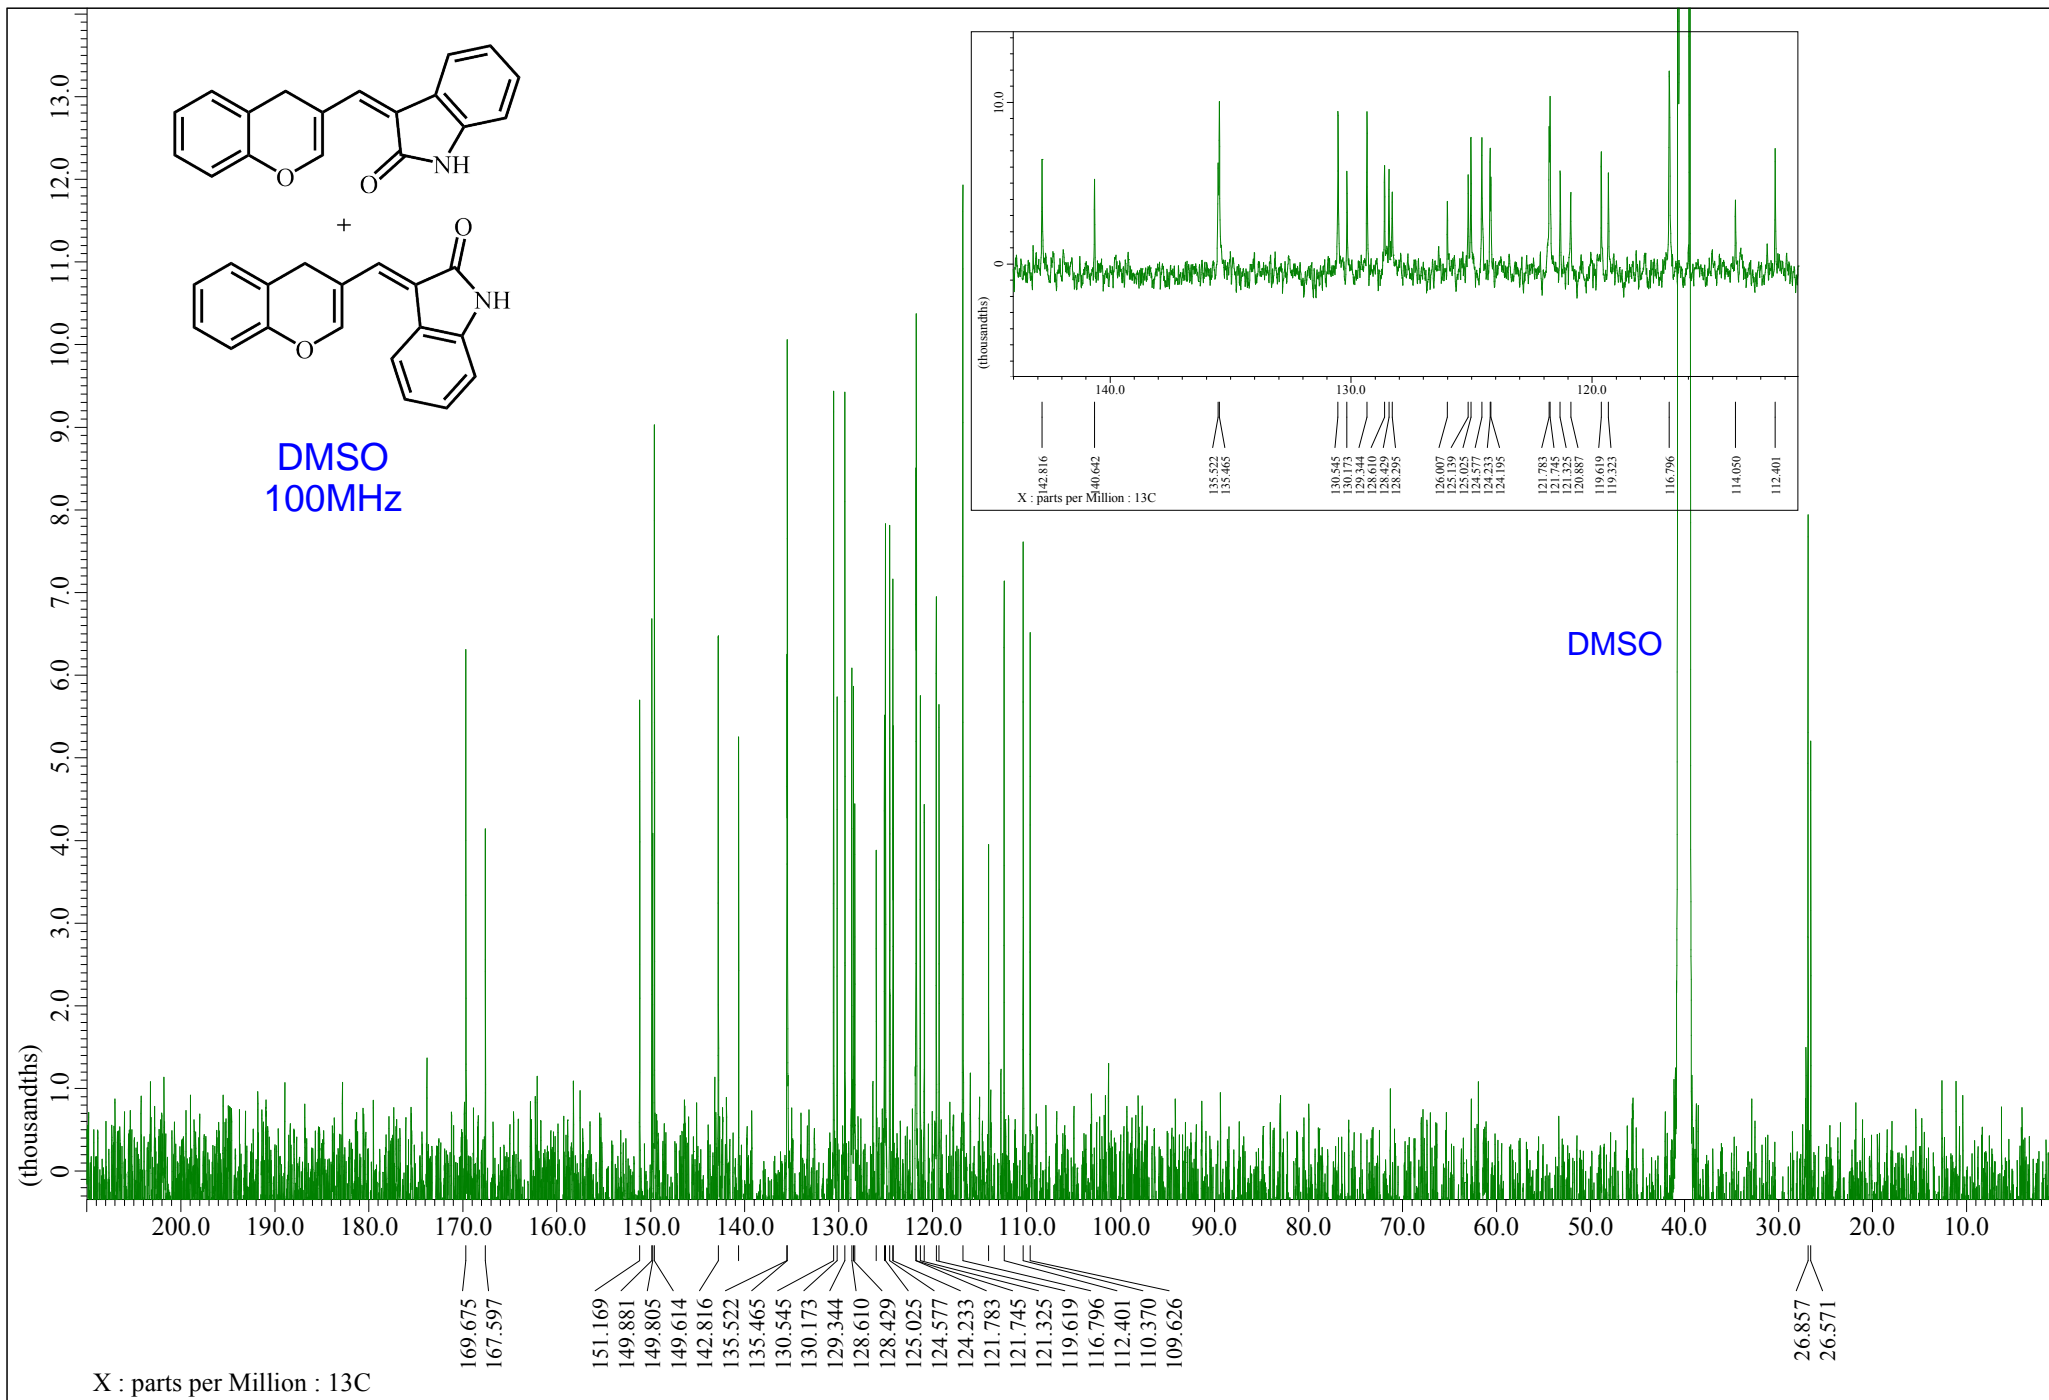

Supplement: d0ra06450e1.pdf [file d0ra06450e1.pdf]
